# Supplementary material for: Transcriptomic Analysis of Resistant and Susceptible Responses in a New Model Root-Knot Nematode Infection System Using Solanum torvum and Meloidogyne arenaria
Source: Front Plant Sci. 2021 May 25;12:680151. doi: 10.3389/fpls.2021.680151 (PMC8194700; doi:10.3389/fpls.2021.680151)
Supplement: Supplementary file 13 [file Table_7.XLSX]

## Sheet: Summary
SUPPLEMENTARY TABLE 7| List of Genes in Self-Organizing Map (SOM) Clusters. The genes in the top 25% of coefficient of variance values were assigned to nine clusters depending on their expression patterns. Scaled expression values represent the average principal component (PC) scores of all genes within a cluster.
Cluster	Treatment	Mock			A2-J			A2-O			Number of genes
	day post inoculation	1	2	3	1	2	3	1	2	3
Cluster 1	Average of scaled expression values	0.151711	0.855266	0.663786	-0.282315	-0.377594	0.740597	0.135098	-0.832286	-1.05426	323
Cluster 2		0.158156	0.0654894	0.0339074	0.0401043	1.71143	-0.557603	-0.449631	-0.330449	-0.671408	429
Cluster 3		0.927405	0.709458	0.704593	0.676979	-0.604614	-0.801069	0.444162	-0.77959	-1.27732	973
Cluster 4		-0.604704	-0.313281	-0.220709	-0.637287	0.418629	2.0852	-0.297304	-0.453413	0.0228709	554
Cluster 5		-0.796204	-0.295299	-0.432696	-0.62181	1.46349	0.138537	-0.759891	0.638946	0.66493	521
Cluster 6		1.07392	0.429676	0.0305488	0.719164	0.207983	-0.986913	-0.84321	0.0718565	-0.703022	333
Cluster 7		-0.780656	-0.494328	-0.542434	-0.809029	0.0433461	1.15929	-0.548297	0.255389	1.71672	1000
Cluster 8		-0.736761	-0.573124	-0.643326	-0.66561	-0.0834566	0.0649792	-0.347772	0.919298	2.06577	1769
Cluster 9		-0.776827	-0.583331	-0.707755	-0.597583	-0.0197679	-0.291704	0.226849	1.60189	1.14823	600

## Sheet: Cluster 1
	Scaled expression									Arabidopsis (TAIR10) BLASTX hit		NCBI non-redundant database BLASTX hit
Accession	Mock.1d	Mock.2d	Mock.3d	A2-J.1d	A2-J.2d	A2-J.3d	A2-O.1d	A2-O.2d	A2-O.3d	AGI locus code	Short description
Storvum000487t1	-0.652462	0.548894	0.778445	-0.446862	0.85225	0.746226	0.885186	-0.754169	-1.95751	AT3G28345.1	ABC transporter family protein	putative ABC transporter B family member 8
Storvum000704t1	0.747789	1.09075	1.19454	-0.504585	-0.909254	-0.0408011	0.854626	-1.05705	-1.37601	AT4G27430.2	COP1-interacting protein 7	COP1-interacting protein 7
Storvum000798t1	-0.935576	0.417491	1.14395	0.223739	0.0108238	1.16317	0.692636	-1.1711	-1.54513	AT5G42710.2		Pre-mRNA-splicing factor like
Storvum000841t1	0.102257	0.915717	0.229771	-0.234608	-0.872708	1.19686	1.19053	-0.919818	-1.608	AT5G44030.1	cellulose synthase A4	cellulose synthase A catalytic subunit 4 [UDP-forming] isoform X1
Storvum000972t1	0.775867	0.914246	0.531659	0.195987	0.0352317	0.33749	0.536717	-1.27451	-2.05269	AT2G47500.1	P-loop nucleoside triphosphate hydrolases superfamily protein with CH (Calponin Homology) domain	kinesin-like protein KIN-14I isoform X1
Storvum001083t1	-0.697483	1.39591	-0.131641	-0.729686	-1.12262	1.46573	0.595096	0.302207	-1.07752	AT2G24130.1	Leucine-rich receptor-like protein kinase family protein	putative leucine-rich repeat receptor-like serine/threonine-protein kinase At2g24130
Storvum001099t1	-0.101198	1.73794	0.552204	-0.317284	-0.835709	1.24002	-0.376425	-0.512818	-1.38673	AT1G75820.1	Leucine-rich receptor-like protein kinase family protein	receptor protein kinase CLAVATA1
Storvum001132t1	-0.472073	0.593031	0.327999	-0.653111	-0.423325	2.03293	0.565123	-0.586295	-1.38428	AT4G18780.1	cellulose synthase family protein	cellulose synthase A catalytic subunit 8 [UDP-forming]
Storvum001149t1	1.0005	1.25014	0.967963	-0.0721492	-0.497465	0.225728	-0.00343962	-1.244	-1.62727	AT2G01980.1	sodium proton exchanger, putative (NHX7) (SOS1)	sodium/hydrogen exchanger 8-like isoform X1
Storvum001523t1	0.705818	-0.398793	1.50295	-0.613881	-1.00581	1.27327	-0.874262	0.459076	-1.04838	AT1G73370.1	sucrose synthase 6	sucrose synthase 5-like
Storvum001637t1	0.0454873	0.523668	0.168834	-0.0316983	0.0775594	2.01547	-0.159713	-1.07814	-1.56146	AT1G63440.1	heavy metal atpase 5	probable copper-transporting ATPase HMA5 isoform X1
Storvum002162t1	0.687397	1.36128	0.737563	-0.447894	-1.31865	0.714016	0.476757	-1.03186	-1.17861	AT3G23430.1	phosphate 1	phosphate transporter PHO1
Storvum002184t1	0.603935	-0.390438	0.391274	0.0818755	-0.114054	1.93862	0.116962	-1.10864	-1.51953	AT2G42490.1	Copper amine oxidase family protein	copper methylamine oxidase-like
Storvum002300t1	0.25785	0.848653	1.83798	-0.386018	-0.0267507	-0.302768	0.309584	-0.897898	-1.64063	AT5G04460.3	RING/U-box superfamily protein	PREDICTED: uncharacterized protein LOC107873846
Storvum002311t1	-0.375508	1.21723	1.52597	-1.54258	-0.374329	0.720674	-0.993467	-0.0302658	-0.147717	AT1G20160.1	Subtilisin-like serine endopeptidase family protein	CO(2)-response secreted protease
Storvum002421t1	0.717827	0.190723	1.4799	-0.146252	-0.802393	1.00358	0.0804314	-0.817741	-1.70607	AT5G67090.1	Subtilisin-like serine endopeptidase family protein	subtilisin-like protease SBT1.9
Storvum002565t1	-0.202856	1.53528	0.270343	-1.34722	0.643565	1.20833	-0.378944	-0.546444	-1.18205	AT2G32540.1	cellulose synthase-like B4	cellulose synthase-like protein H1
Storvum002715t1	-0.0988967	1.76692	0.180971	-1.17416	-0.676214	1.27676	0.248332	-0.490817	-1.03289	AT4G13420.1	high affinity K+ transporter 5	potassium transporter 26-like
Storvum002762t1	0.388967	0.782243	1.03563	-0.288367	-0.4232	1.50179	-0.509679	-0.86074	-1.62665	AT4G35300.4	tonoplast monosaccharide transporter2	monosaccharide-sensing protein 2-like
Storvum002883t1	-0.465619	1.32014	0.0478055	-0.159048	0.579211	1.58531	-0.576155	-1.40448	-0.927167	AT1G54570.1	Esterase/lipase/thioesterase family protein	acyltransferase-like protein At1g54570, chloroplastic isoform X1
Storvum003080t1	0.644698	0.0150354	0.262786	-0.0561539	0.443716	1.48988	0.28728	-1.19202	-1.89522	AT4G31590.1	Cellulose-synthase-like C5	probable xyloglucan glycosyltransferase 5
Storvum003159t1	-0.530472	-0.874953	1.51234	-0.47577	-0.169522	1.55563	0.610523	-0.430968	-1.19681	AT1G64300.2	Protein kinase family protein	mitogen-activated protein kinase kinase kinase 7-like
Storvum003280t1	-0.285497	0.472121	0.526522	-0.391226	-0.0305193	1.12761	1.34409	-0.952044	-1.81105	AT5G63710.1	Leucine-rich repeat protein kinase family protein	probable LRR receptor-like serine/threonine-protein kinase At5g63710 isoform X2
Storvum003366t1	0.717823	0.232855	0.383926	-0.592361	-0.913579	2.0045	0.186925	-0.964028	-1.05606	AT5G55830.1	Concanavalin A-like lectin protein kinase family protein	L-type lectin-domain containing receptor kinase VIII.1-like
Storvum003414t1	1.15504	0.462255	0.800728	-0.625461	-0.655103	-0.0229898	1.35063	-1.48512	-0.979978	AT4G23160.1	cysteine-rich RLK (RECEPTOR-like protein kinase) 8	retrovirus-related Pol polyprotein from transposon TNT 1-94
Storvum003448t1	0.255778	-0.240448	0.352898	-0.0345935	-0.0827761	1.09907	1.53812	-1.44412	-1.44393	AT5G13150.1	exocyst subunit exo70 family protein C1	exocyst complex component EXO70B1-like
Storvum003671t1	-0.111002	0.249417	0.185538	0.0263172	1.49667	1.29051	-0.369282	-1.4767	-1.29147	AT1G23090.1	sulfate transporter 91	probable sulfate transporter 3.3
Storvum003712t1	0.495833	0.624228	0.591421	-0.446515	-0.151731	1.42169	0.476919	-1.44236	-1.56948	AT2G23770.1	protein kinase family protein / peptidoglycan-binding LysM domain-containing protein	lysM domain receptor-like kinase 4
Storvum003879t1	-1.08274	0.942793	0.83738	0.343283	-0.0316878	1.5057	-0.979258	-1.36517	-0.170306	AT1G21270.1	wall-associated kinase 2	wall-associated receptor kinase 2-like
Storvum003888t1	1.18983	-0.16986	0.448961	0.508857	-1.35304	0.901431	0.801513	-0.940056	-1.38764	AT5G02070.1	Protein kinase family protein	wall-associated receptor kinase-like 20
Storvum003955t1	0.639979	0.949628	0.819347	0.00115822	-1.36899	0.209549	0.996067	-1.66337	-0.583372	AT2G14830.1	Regulator of Vps4 activity in the MVB pathway protein	IST1-like protein
Storvum004058t1	-0.358547	0.675155	-0.00913633	-0.090048	-0.0537715	2.06485	0.240831	-1.10403	-1.3653	AT5G60720.1	Protein of unknown function, DUF547	Rho-associated protein kinase
Storvum004116t1	0.980625	0.315697	1.40261	-0.208858	-0.543415	0.858094	-0.0691837	-1.09419	-1.64138	AT1G75730.2		PREDICTED: uncharacterized protein LOC107018171 isoform X2
Storvum004131t1	0.375539	0.0179444	0.315272	-0.00167523	-0.00782841	1.91584	0.226481	-1.41092	-1.43065	AT5G49720.1	glycosyl hydrolase 9A1	endoglucanase 25-like
Storvum004254t1	0.418217	0.236622	0.911404	-0.122406	-0.688621	1.86237	-0.200085	-1.11212	-1.30538	AT5G49460.1	ATP citrate lyase subunit B 2	ATP-citrate synthase beta chain protein 2
Storvum004382t1	-0.259669	1.82349	1.42479	-0.29919	-0.897134	-0.0223223	0.0221882	-0.700871	-1.09127	AT1G32450.1	nitrate transporter 1.5	protein NRT1/ PTR FAMILY 7.3-like
Storvum004499t1	0.732387	0.658749	1.58375	0.462101	-0.775027	0.419708	-0.533606	-1.27542	-1.27264	AT5G24030.1	SLAC1 homologue 3	S-type anion channel SLAH2-like
Storvum004709t1	0.876686	1.73375	0.681013	-0.941764	-1.10871	0.418578	-0.209453	-1.15813	-0.291971	AT2G30520.1	Phototropic-responsive NPH3 family protein	root phototropism protein 2
Storvum005015t1	0.839139	0.527617	1.01488	0.397347	-0.0233542	0.506284	0.0393762	-1.40373	-1.89756	AT4G02320.1	Plant invertase/pectin methylesterase inhibitor superfamily	pectinesterase-like
Storvum005114t1	0.0831049	0.18993	0.964128	-0.338458	0.376612	1.49001	0.199342	-1.24086	-1.7238	AT4G32810.1	carotenoid cleavage dioxygenase 8	carotenoid cleavage dioxygenase 8 homolog B, chloroplastic
Storvum005243t2	0.0263801	1.50622	1.18971	0.410172	-0.546503	0.177051	-0.00794156	-1.27365	-1.48145	AT4G23160.1	cysteine-rich RLK (RECEPTOR-like protein kinase) 8	retrovirus-related Pol polyprotein from transposon TNT 1-94
Storvum005292t1	0.448327	0.146155	1.31702	0.124936	-0.236404	0.345591	0.911718	-1.11199	-1.94536	AT2G42250.1	cytochrome P450, family 712, subfamily A, polypeptide 1	3,9-dihydroxypterocarpan 6A-monooxygenase
Storvum005403t1	0.4549	-1.43907	0.629683	-0.549241	-0.612148	-0.0398356	1.60823	-1.04112	0.988598	AT3G21240.1	4-coumarate:CoA ligase 2	4-coumarate--CoA ligase 1
Storvum005595t1	-0.563287	0.751913	0.660996	-0.70025	-0.855973	1.94584	0.188951	-0.159339	-1.26885	AT5G54690.1	galacturonosyltransferase 12	probable galacturonosyltransferase 12
Storvum005596t1	-0.594444	0.190253	0.887817	-0.676581	-0.760165	1.87079	0.549575	-0.0597146	-1.40753	AT5G54690.1	galacturonosyltransferase 12	probable galacturonosyltransferase 12
Storvum005641t1	0.378998	0.237773	0.535846	0.514758	0.618882	1.32541	-0.509558	-1.4154	-1.68671	AT1G07710.1	Ankyrin repeat family protein	ankyrin repeat-containing protein At5g02620
Storvum005668t1	-0.186275	-0.683983	0.259179	0.162034	0.124538	1.44753	1.41746	-1.10149	-1.439	AT1G19900.1	glyoxal oxidase-related protein	galactose oxidase-like
Storvum005755t1	0.358198	0.832876	0.734342	0.28408	-0.523626	0.786837	0.717303	-1.41872	-1.77129	AT2G47010.2		uncharacterized protein LOC104645869
Storvum005766t1	0.373284	0.486413	0.206503	0.638511	-1.38675	1.36526	0.565402	-1.64339	-0.605229	AT1G19250.1	flavin-dependent monooxygenase 1	probable flavin-containing monooxygenase 1
Storvum006189t1	-0.0534464	1.44842	1.72923	-0.0614231	0.0118432	-0.492598	-0.34437	-0.976924	-1.26073	AT3G14610.1	cytochrome P450, family 72, subfamily A, polypeptide 7	cytochrome P450 CYP72A219-like
Storvum006195t1	0.189596	0.430751	0.601641	-0.0774364	-0.943383	1.7086	0.624357	-1.28306	-1.25107	AT2G45560.1	cytochrome P450, family 76, subfamily C, polypeptide 1	Geraniol 8-hydroxylase
Storvum006246t1	-0.435725	0.0785807	2.01369	-1.32173	-0.107987	1.1525	-0.4254	-0.362545	-0.591389	AT3G07020.2	UDP-Glycosyltransferase superfamily protein	sterol 3-beta-glucosyltransferase UGT80A2-like
Storvum006260t1	0.449714	0.409647	0.646278	-0.27256	-0.360566	1.83041	-0.00105761	-1.41227	-1.2896	AT3G26320.1	cytochrome P450, family 71, subfamily B, polypeptide 36	premnaspirodiene oxygenase-like
Storvum006489t1	0.930735	0.319721	-0.137101	0.463494	0.266507	0.995895	0.448161	-1.38811	-1.89931	AT1G33110.1	MATE efflux family protein	protein DETOXIFICATION 21-like
Storvum006633t1	0.035657	-0.0507884	1.59629	0.302562	-0.974964	1.10829	0.422971	-1.32465	-1.11536	AT4G31140.1	O-Glycosyl hydrolases family 17 protein	glucan endo-1,3-beta-glucosidase 5-like
Storvum006846t1	0.306754	-0.106925	0.304586	0.050579	-0.945762	2.03779	0.43082	-1.49047	-0.58737	AT5G42930.1	alpha/beta-Hydrolases superfamily protein	phospholipase A1-IIbeta-like
Storvum006914t1	-0.0118401	0.0620867	0.423631	-0.72547	0.448174	1.37917	1.13015	-1.00006	-1.70584	AT5G22090.2	Protein of unknown function (DUF3049)	protein FAF-like, chloroplastic
Storvum006950t1	1.3026	-0.401001	0.0684738	0.593452	-0.594645	1.22507	0.479001	-1.08216	-1.5908	AT1G79720.1	Eukaryotic aspartyl protease family protein	aspartyl protease family protein At5g10770-like
Storvum006996t1	-0.280365	0.564727	0.341495	-0.423847	0.118407	1.87914	0.45949	-1.24401	-1.41504	AT3G50150.1	Plant protein of unknown function (DUF247)	UPF0481 protein At3g47200-like
Storvum007259t2	0.496655	0.610002	1.83801	-0.294959	-0.641083	0.428184	0.100761	-1.0545	-1.48307	AT3G02100.1	UDP-Glycosyltransferase superfamily protein	UDP-glycosyltransferase 83A1-like
Storvum007416t1	0.715198	0.485052	0.624434	-0.567196	-0.932252	1.13286	1.0681	-1.43261	-1.09359	AT1G25450.1	3-ketoacyl-CoA synthase 5	3-ketoacyl-CoA synthase 5-like
Storvum007492t1	-0.149569	1.37276	-0.357235	-0.0391819	-0.967736	1.48162	0.698628	-1.38355	-0.655741	AT3G49260.2	IQ-domain 21	protein IQ-DOMAIN 1
Storvum007543t1	0.0896144	0.870428	1.80334	-0.654003	-0.833643	0.923531	-0.250903	-0.823053	-1.12531	AT3G18180.1	Glycosyltransferase family 61 protein	protein O-linked-mannose beta-1,4-N-acetylglucosaminyltransferase 2-like
Storvum007593t1	0.765324	1.33015	0.968503	-1.54272	0.18362	0.474305	-1.27197	-0.314156	-0.593056	AT1G18330.1	Homeodomain-like superfamily protein	protein REVEILLE 1-like isoform X2
Storvum007628t1	1.38979	0.333515	1.05098	0.199982	-1.37541	0.81603	-0.382786	-1.16406	-0.868033	AT2G20570.1	GBF's pro-rich region-interacting factor 1	transcription activator GLK1
Storvum007887t1	0.908257	-0.642817	1.026	-0.914001	0.811253	0.522863	0.834913	-1.23493	-1.31154	AT2G31070.1	TCP domain protein 10	transcription factor TCP3-like
Storvum008032t1	0.482791	-0.408712	0.379611	0.324513	-0.507728	0.530535	1.81994	-1.13111	-1.48984	AT5G19160.1	TRICHOME BIREFRINGENCE-LIKE 11	protein trichome birefringence-like 10
Storvum008338t1	0.91651	0.221125	0.874443	0.248137	0.70407	0.766783	-0.873871	-1.85037	-1.00683	AT1G30080.1	Glycosyl hydrolase superfamily protein	glucan endo-1,3-beta-glucosidase 11-like
Storvum008451t1	0.715078	0.937629	0.66911	-0.325169	-0.735881	0.691004	0.929764	-1.54319	-1.33835	AT5G15900.1	TRICHOME BIREFRINGENCE-LIKE 19	protein trichome birefringence-like 19
Storvum008534t1	-0.374179	0.542801	1.94913	-0.565914	0.254493	-0.465091	0.460952	-0.0860869	-1.71611	AT1G50360.1	P-loop containing nucleoside triphosphate hydrolases superfamily protein	myosin-1-like isoform X1
Storvum008541t2	0.970852	-0.0774483	1.40096	0.0931666	-0.491791	1.09578	-1.23561	-1.41141	-0.344496	AT3G53830.1	Regulator of chromosome condensation (RCC1) family protein	ultraviolet-B receptor UVR8-like isoform X2
Storvum008693t1	0.0750827	0.773428	1.72792	0.120232	-1.26312	0.795799	-0.29169	-0.648744	-1.28891	AT2G46630.1		vegetative cell wall protein gp1-like
Storvum008811t1	0.725625	0.357099	0.452148	0.483268	-0.322769	1.33972	0.124664	-1.55357	-1.60618	AT4G12730.1	FASCICLIN-like arabinogalactan 2	Fasciclin-like arabinogalactan protein 2
Storvum008942t1	0.441109	0.823913	0.703013	-0.155376	-0.908355	1.04967	0.855678	-1.37291	-1.43675	AT3G54950.1	patatin-like protein 6	patatin-like protein 3
Storvum009189t1	-0.25045	0.483948	-0.190579	-0.30162	-1.22268	1.8866	1.12115	-0.986453	-0.539918	AT2G39430.1	Disease resistance-responsive (dirigent-like protein) family protein	dirigent protein 24-like
Storvum009254t1	-0.73673	0.399647	-0.326472	-0.546735	-0.0800383	1.38032	1.31636	0.3595	-1.76586	AT2G13650.3	golgi nucleotide sugar transporter 1	GDP-mannose transporter GONST1-like isoform X1
Storvum009314t1	-0.0588577	1.07839	-0.673362	-0.857824	-1.28978	1.71981	0.76871	-0.0304261	-0.656664	AT1G16310.1	Cation efflux family protein	metal tolerance protein 9-like
Storvum009732t2	0.374246	0.963724	0.39225	0.344034	-1.36095	0.46756	1.26425	-1.23904	-1.20608	AT2G39430.1	Disease resistance-responsive (dirigent-like protein) family protein	dirigent protein 24-like
Storvum009885t1	1.17536	-0.799519	-0.100771	0.271205	-0.602574	0.908937	1.42835	-1.32033	-0.960656	AT1G58410.1	Disease resistance protein (CC-NBS-LRR class) family	putative late blight resistance protein homolog R1A-3
Storvum009926t1	-0.197441	0.241734	2.19118	-0.281429	-0.467752	0.4666	0.0669954	-0.489795	-1.5301	AT1G70560.1	tryptophan aminotransferase of Arabidopsis 1	L-tryptophan--pyruvate aminotransferase 1-like
Storvum010121t1	-0.544341	1.78574	1.01218	-0.116472	0.15835	0.623474	-0.841804	-0.724652	-1.35248	AT4G23160.1	cysteine-rich RLK (RECEPTOR-like protein kinase) 8	Retrovirus-related Pol polyprotein from transposon TNT 1-94
Storvum010242t1	0.422689	1.41387	0.860126	-0.553568	-1.16064	1.21658	-0.285972	-0.820226	-1.09286	AT5G07050.1	nodulin MtN21 /EamA-like transporter family protein	WAT1-related protein At5g07050-like
Storvum010265t1	0.567948	0.283185	-0.128172	-0.170859	-0.0528444	0.557596	1.76836	-1.16778	-1.65743	AT4G25420.1	2-oxoglutarate (2OG) and Fe(II)-dependent oxygenase superfamily protein	gibberellin 20 oxidase 1-like
Storvum010380t1	1.19955	0.979903	0.153921	-0.65517	-0.501071	0.832715	0.622669	-0.89753	-1.73499	AT1G79430.2	Homeodomain-like superfamily protein	myb family transcription factor APL isoform X2
Storvum010388t2	-0.547606	1.52051	1.92043	-0.42963	-0.589859	-0.653045	-0.0119325	-0.676209	-0.532662	AT1G62280.1	SLAC1 homologue 1	S-type anion channel SLAH1-like
Storvum010390t1	0.957454	0.387112	0.743218	0.0231867	-0.722068	0.927407	0.675981	-1.31559	-1.6767	AT1G15125.1	S-adenosyl-L-methionine-dependent methyltransferases superfamily protein	probable S-adenosylmethionine-dependent methyltransferase At5g38100
Storvum010503t1	0.906853	1.1784	0.454351	0.630828	-0.463437	0.482283	-0.126114	-1.40946	-1.65371	AT5G23170.1	Protein kinase superfamily protein	serine/threonine-protein kinase-like protein At5g23170
Storvum010581t2	0.815613	1.88936	-0.457247	-0.916902	-1.09359	-0.222966	0.933293	-0.200184	-0.747376	AT2G47450.1	chloroplast signal recognition particle component (CAO)	signal recognition particle 43 kDa protein, chloroplastic
Storvum010677t1	0.524355	1.31027	-0.241477	-0.685392	-1.10431	1.49387	0.525185	-0.696226	-1.12627	AT1G09380.1	nodulin MtN21 /EamA-like transporter family protein	WAT1-related protein At1g09380-like
Storvum010877t1	-0.145073	-0.633785	1.79296	0.244954	0.376823	0.966332	-1.04256	-1.45938	-0.100276	AT5G54880.1	DTW domain-containing protein	DTW domain-containing protein 2-like
Storvum010901t1	-1.2918	1.68136	0.532589	-0.916076	-0.08387	0.144447	1.20435	-0.417179	-0.853822	AT5G07440.2	glutamate dehydrogenase 2	glutamate dehydrogenase A-like
Storvum010980t1	0.619648	1.24338	0.79865	0.453234	-0.720989	0.409658	0.190091	-1.39203	-1.60164	AT2G46420.1	Plant protein 1589 of unknown function	PREDICTED: uncharacterized protein LOC102583277
Storvum011078t1	0.629956	1.00049	-0.233342	-0.0295503	0.276707	1.43372	-0.120194	-1.36472	-1.59306	AT1G05300.1	zinc transporter 5 precursor	zinc transporter 5-like
Storvum011165t1	0.32276	1.37269	0.742562	0.189731	-0.973123	0.97453	0.0254845	-1.28663	-1.368	AT1G09380.1	nodulin MtN21 /EamA-like transporter family protein	WAT1-related protein At1g09380-like
Storvum011228t1	0.231386	1.15947	0.584852	1.08525	-0.302896	0.600304	-0.363328	-1.57822	-1.41682	AT1G05610.1	ADP-glucose pyrophosphorylase small subunit 2	inactive glucose-1-phosphate adenylyltransferase small subunit 2, chloroplastic
Storvum011238t1	0.167894	1.54215	1.37856	-0.157494	-0.866716	0.196516	-0.0522151	-0.637111	-1.57159	AT2G26150.1	heat shock transcription factor A2	heat stress transcription factor A-7a-like
Storvum011240t1	0.150777	0.653978	0.0519429	0.112668	-0.0963342	0.578637	1.56111	-1.17881	-1.83397	AT1G07730.2	Disease resistance-responsive (dirigent-like protein) family protein	dirigent protein 25-like isoform X1
Storvum011358t1	-0.946739	1.16719	1.88987	-1.0315	-0.362709	0.559486	-0.574664	-0.143988	-0.556942	AT4G00980.1	zinc knuckle (CCHC-type) family protein	Zinc finger, CCHC-type
Storvum011386t1	-0.0403987	0.168421	0.778382	-0.670447	-1.17916	1.66078	1.05601	-0.689267	-1.08432	AT1G75280.1	NmrA-like negative transcriptional regulator family protein	isoflavone reductase-like protein
Storvum011457t1	-0.10523	0.434218	0.797749	-0.459165	-0.777966	2.0614	0.0925224	-0.99045	-1.05308	AT2G26710.1	Cytochrome P450 superfamily protein	cytochrome P450 CYP749A22-like
Storvum011467t1	-0.122757	0.552439	-0.161338	-0.826873	-0.672714	1.70835	1.31092	-0.518539	-1.26949	AT5G55970.2	RING/U-box superfamily protein	E3 ubiquitin-protein ligase At1g63170-like
Storvum011518t1	-0.574128	1.34888	0.556854	-0.880802	-0.652775	1.51009	0.300338	-0.223387	-1.38507	AT4G35350.1	xylem cysteine peptidase 1	xylem cysteine proteinase 1-like
Storvum011568t1	0.206776	0.824803	1.27054	0.0633546	-0.60826	1.34525	-1.05569	-1.39072	-0.65606	AT4G29100.1	basic helix-loop-helix (bHLH) DNA-binding superfamily protein	transcription factor bHLH68-like isoform X1
Storvum011625t1	-0.5837	-0.40017	0.295797	-0.375683	0.51965	-0.600114	2.38615	-0.324792	-0.917139	AT5G35810.1	Ankyrin repeat family protein	ankyrin repeat-containing protein At3g12360-like isoform X1
Storvum011697t1	-0.500378	1.86558	-0.120871	-0.786801	-1.37166	1.29794	-0.212855	-0.154512	-0.0164453	AT5G25980.2	glucoside glucohydrolase 2	---NA---
Storvum011747t1	0.0926723	1.01175	0.670788	-0.409876	-0.263828	1.72459	-0.375807	-1.51046	-0.939833	AT2G38700.1	mevalonate diphosphate decarboxylase 1	diphosphomevalonate decarboxylase MVD2-like
Storvum011804t1	0.546557	-0.494567	1.10124	0.39478	0.453851	0.965178	0.160207	-1.69604	-1.43121	AT4G00430.1	plasma membrane intrinsic protein 1;4	X intrinsic protein
Storvum011819t1	0.0723499	1.01383	0.903935	-0.143127	-1.38923	1.28225	0.190737	-0.39311	-1.53763	AT4G29100.1	basic helix-loop-helix (bHLH) DNA-binding superfamily protein	transcription factor bHLH68-like isoform X2
Storvum011824t1	-0.886647	0.347258	0.49728	0.317627	-0.788682	0.0870044	2.15047	-0.908772	-0.815541	AT2G28315.1	Nucleotide/sugar transporter family protein	uncharacterized membrane protein At1g06890-like
Storvum011977t1	0.846287	1.31287	0.525286	0.428886	-0.190938	0.211246	0.011336	-1.38057	-1.7644	AT4G27250.1	NAD(P)-binding Rossmann-fold superfamily protein	dihydroflavonol-4-reductase isoform X1
Storvum012169t1	0.82286	1.52229	0.340344	0.0508496	-0.691796	0.967	-0.529039	-1.00449	-1.47802	AT4G36540.1	BR enhanced expression 2	Transcription factor HBI1
Storvum012178t1	0.602836	0.514496	0.545616	0.485251	-0.421661	1.02868	0.512606	-1.65172	-1.6161	AT3G12110.1	actin-11	actin
Storvum012203t1	-0.205448	1.8854	1.16371	-0.885583	-0.359563	0.494478	-0.994265	-0.162972	-0.935761	AT2G37180.1	Aquaporin-like superfamily protein	aquaporin PIP2-1-like
Storvum012232t1	1.01577	-0.100787	0.465667	-0.353505	-1.01889	1.87496	-0.0606587	-1.35742	-0.465135	AT4G32272.1	Nucleotide/sugar transporter family protein	UDP-sugar transporter sqv-7-like
Storvum012403t1	0.271126	0.583543	0.659338	-0.330873	-0.702287	1.73221	0.357538	-1.52631	-1.04429	AT1G44970.1	Peroxidase superfamily protein	peroxidase 9-like
Storvum012509t1	-0.402393	0.34816	0.961535	-0.582955	-1.88964	-0.523235	1.03614	-0.174032	1.22642	AT1G15950.1	cinnamoyl coa reductase 1	cinnamoyl-CoA reductase 1-like
Storvum012534t1	-0.197094	0.684152	0.077584	-0.356151	-0.0756214	1.62038	0.974189	-1.53747	-1.18997	AT1G44970.1	Peroxidase superfamily protein	peroxidase 9-like
Storvum012862t1	0.78947	0.144148	-0.0516623	0.619196	0.724996	0.686775	0.45918	-1.49084	-1.88127	AT1G22030.1		PREDICTED: uncharacterized protein LOC102603732
Storvum012890t1	-0.575967	1.50055	1.57739	-1.49403	-0.320637	0.225624	-0.0320276	-0.717589	-0.163314	AT4G17565.1	F-box family protein with a domain of unknown function (DUF295)	f-box/kelch-repeat protein
Storvum012906t1	0.959297	1.44953	0.904421	-0.487182	-1.0978	0.350395	0.180088	-1.05217	-1.20659	AT3G63110.1	isopentenyltransferase 3	adenylate isopentenyltransferase 3, chloroplastic-like
Storvum012915t1	0.868257	0.924385	1.19118	0.306039	-0.757782	0.533769	-0.2918	-1.17829	-1.59575	AT1G78110.1		protein Shroom4-like isoform X1
Storvum013047t1	0.0114964	1.48765	1.31809	-1.53648	-1.14381	-0.332181	-0.112103	0.477848	-0.17052	AT4G08950.1	Phosphate-responsive 1 family protein	protein EXORDIUM-like
Storvum013443t1	0.451823	2.02807	0.145436	-0.848479	-1.22203	0.282964	0.0473341	-1.14054	0.255422	AT5G04160.1	Nucleotide-sugar transporter family protein	probable sugar phosphate/phosphate translocator At5g04160
Storvum013654t1	-0.519703	0.0800874	2.13505	-0.836332	-0.358089	1.1049	-0.539063	-0.175021	-0.891827	AT5G44960.1	F-box/RNI-like/FBD-like domains-containing protein	chitinase 2-like
Storvum013787t1	0.583738	0.434973	-0.0142229	-0.597717	-0.931499	2.0704	0.255783	-1.26833	-0.533125	AT3G19980.1	flower-specific, phytochrome-associated protein phosphatase 3	phytochrome-associated serine/threonine-protein phosphatase
Storvum013857t1	-0.0329641	1.30118	1.54407	0.201685	-0.289262	0.309888	-1.3239	-1.34798	-0.362721	AT4G02810.1	Protein of unknown function (DUF3049)	protein FANTASTIC FOUR 3-like
Storvum013945t1	0.00243258	1.31358	1.36577	-0.553433	0.388631	0.224541	0.029039	-1.20841	-1.56215	AT3G48740.1	Nodulin MtN3 family protein	bidirectional sugar transporter N3-like
Storvum013963t1	-0.0788425	1.57181	0.963148	-0.370931	0.0267123	0.770277	-0.222773	-0.956817	-1.70258	AT3G48740.1	Nodulin MtN3 family protein	bidirectional sugar transporter N3-like
Storvum014001t1	-0.299886	1.29928	1.53851	0.736299	-0.854677	-0.0044833	-0.319767	-0.670201	-1.42508	AT2G02240.1	F-box family protein	F-box protein PP2-B10-like
Storvum014054t1	0.49877	0.901975	0.420775	0.302862	-1.15033	1.32	0.312204	-1.5371	-1.06915	AT2G36830.1	gamma tonoplast intrinsic protein	probable aquaporin TIP1-1
Storvum014299t1	0.85557	0.464537	1.10997	0.147248	-1.29103	0.848189	0.411461	-1.30521	-1.24074	AT3G23730.1	xyloglucan endotransglucosylase/hydrolase 16	xyloglucan endotransglucosylase/hydrolase 2-like
Storvum014337t1	1.06662	0.585358	0.582489	-0.208355	-0.817903	0.798527	0.830802	-1.17967	-1.65787	AT3G48740.1	Nodulin MtN3 family protein	bidirectional sugar transporter SWEET12-like
Storvum014461t1	-0.173368	0.317682	1.55043	-0.263769	0.110681	0.0287869	1.16644	-0.996519	-1.74037	AT2G45660.1	AGAMOUS-like 20	MADS-box protein SOC1-like
Storvum014606t1	1.3204	0.736665	0.41226	-0.284985	-1.62511	0.873721	0.40856	-1.23368	-0.60783	AT3G47470.1	light-harvesting chlorophyll-protein complex I subunit A4	chlorophyll a-b binding protein P4, chloroplastic
Storvum014708t1	0.290263	0.721285	0.357283	0.0813434	0.404734	1.03973	0.500145	-1.65292	-1.74186	AT3G23730.1	xyloglucan endotransglucosylase/hydrolase 16	xyloglucan endotransglucosylase/hydrolase 2-like
Storvum014748t1	0.431747	0.320547	-0.0901548	-0.245484	-1.46573	0.602407	1.96768	-0.987103	-0.533904	AT1G29930.1	chlorophyll A/B binding protein 1	Chlorophyll a-b binding protein 3C, chloroplastic
Storvum014785t1	0.180031	1.57548	1.14609	-0.496115	-0.574228	-0.529919	0.913394	-0.988135	-1.2266	NA	NA	PREDICTED: uncharacterized protein LOC109244218
Storvum014949t1	0.00335248	0.840868	0.833115	0.951111	-0.721138	0.975513	-0.201308	-0.799098	-1.88242	AT2G24790.2	CONSTANS-like 3	PREDICTED: uncharacterized protein LOC102592537
Storvum015091t1	0.678587	1.71222	-0.918614	-0.93932	0.0640451	1.18136	-1.04675	-0.609361	-0.122163	AT5G62740.1	SPFH/Band 7/PHB domain-containing membrane-associated protein family	Hypersensitive-induced response protein 2
Storvum015114t1	0.949846	1.51687	1.19574	-0.160149	-0.725644	-0.148796	-0.404276	-1.39211	-0.831482	AT5G40670.1	PQ-loop repeat family protein / transmembrane family protein	cystinosin homolog isoform X2
Storvum015243t1	1.65813	-0.133286	1.21264	-0.478978	-0.408099	0.398096	0.231675	-1.0419	-1.43829	AT5G52020.1	Integrase-type DNA-binding superfamily protein	ethylene-responsive transcription factor ERF027-like
Storvum015320t1	-0.301342	0.994165	2.05897	-0.549639	-0.219902	-0.211793	0.317673	-0.993686	-1.09445	AT4G00430.1	plasma membrane intrinsic protein 1;4	probable aquaporin PIP1-2
Storvum015354t1	0.118171	0.702174	0.594259	-0.476544	-0.0570451	1.25771	0.879093	-1.48418	-1.53364	AT4G38620.1	myb domain protein 4	myb-related protein 308-like
Storvum015561t2	-0.19792	1.22644	0.606422	-0.175989	-0.880018	0.687251	1.26593	-1.30365	-1.22846	AT2G36100.1	Uncharacterised protein family (UPF0497)	casparian strip membrane protein 2-like
Storvum015648t1	0.293959	0.49772	1.21857	-0.0554392	-0.0391188	0.111515	1.0998	-1.74412	-1.38289	AT5G51790.1	basic helix-loop-helix (bHLH) DNA-binding superfamily protein	transcription factor bHLH118-like
Storvum015691t1	0.624755	0.928085	0.0589548	-0.351466	-0.680896	0.714563	1.39003	-1.57964	-1.10438	NA	NA	PREDICTED: uncharacterized protein LOC102585381 isoform X1
Storvum015911t1	-0.142907	0.931146	0.474474	1.26958	-0.157067	1.05395	-1.4376	-1.20822	-0.783347	AT1G17860.1	Kunitz family trypsin and protease inhibitor protein	kunitz trypsin inhibitor 2-like
Storvum015949t1	-0.0182528	0.826929	0.460199	-0.42522	-0.562814	1.90789	0.217976	-1.09652	-1.31019	AT4G01470.1	tonoplast intrinsic protein 1;3	aquaporin TIP1-3-like
Storvum016020t1	0.11612	-0.0221256	-0.655611	0.113902	-0.73343	2.02008	0.396432	0.383406	-1.61877	AT2G34830.1	WRKY DNA-binding protein 35	probable WRKY transcription factor 65 isoform X1
Storvum016093t1	-1.00527	1.13087	0.95796	-1.67289	-0.967501	-0.135528	0.511997	0.791576	0.388794	AT4G31330.1	Protein of unknown function, DUF599	PREDICTED: uncharacterized protein LOC102602304
Storvum016102t1	0.120134	1.27652	1.23762	-0.204019	-1.07097	0.794388	0.229261	-0.953782	-1.42915	AT4G17340.1	tonoplast intrinsic protein 2;2	probable aquaporin TIP-type RB7-18C
Storvum016183t1	0.652911	1.53706	0.763692	0.169376	-0.634292	0.293352	0.0340506	-1.1394	-1.67674	AT5G05080.2	ubiquitin-conjugating enzyme 22	movement protein
Storvum016220t1	0.422157	1.36843	1.02003	0.159935	-0.164586	-0.0302595	0.188448	-1.02027	-1.94388	AT2G26267.1		---NA---
Storvum016406t1	-0.478761	1.52098	-0.936898	0.960298	-0.260441	0.952051	0.209147	-0.388984	-1.57739	AT4G32270.1	Ubiquitin-like superfamily protein	U11/U12 small nuclear ribonucleoprotein 25 kDa protein-like isoform X2
Storvum016628t1	0.653676	-0.357236	1.43241	-1.34382	-0.0624753	0.834274	0.580066	-1.59048	-0.146418	AT1G30890.2	Integral membrane HRF1 family protein	protein YIF1B-like
Storvum016706t1	0.342068	-0.743138	0.598257	-0.420312	-1.35492	0.73947	1.94832	-0.584924	-0.524824	AT4G31115.1	Protein of unknown function (DUF1997)	PREDICTED: uncharacterized protein LOC107029061
Storvum016870t1	-1.06998	1.31141	0.889356	-1.02953	-0.0404873	1.3667	-0.263079	-0.00433606	-1.16006	AT3G46130.1	myb domain protein 48	transcription factor MYB48-like
Storvum016930t1	-0.332021	1.31353	1.44318	-0.155761	-0.490981	0.0901009	0.65449	-1.57611	-0.946425	AT2G27360.1	GDSL-like Lipase/Acylhydrolase superfamily protein	acetylajmalan esterase-like isoform X1
Storvum017141t1	0.242049	0.522494	0.78904	-0.196978	0.98165	1.22168	-0.75466	-1.25001	-1.55527	AT5G23370.1	GRAM domain-containing protein / ABA-responsive protein-related	putative GEM-like protein 8
Storvum017277t1	-0.164514	1.20699	0.256212	1.61974	-1.16632	0.513541	-0.188636	-1.11018	-0.966838	AT2G27140.1	HSP20-like chaperones superfamily protein	inactive protein RESTRICTED TEV MOVEMENT 2-like
Storvum017665t1	-0.870183	1.19012	0.188537	1.03448	-0.141635	0.0844405	1.09309	-0.994952	-1.5839	AT2G17940.1	Plant protein of unknown function (DUF827)	WEB family protein At2g17940-like isoform X1
Storvum017678t1	-0.565844	0.879941	1.00455	-0.530021	1.3013	0.822447	-0.647093	-0.771263	-1.49402	AT3G18260.1	Reticulon family protein	reticulon-like protein B9
Storvum017930t1	1.43496	-0.225978	0.0357668	0.451659	0.114167	0.834612	0.44548	-1.53162	-1.55905	AT3G44070.1	Glycosyl hydrolase family 35 protein	PREDICTED: uncharacterized protein LOC105961778
Storvum018171t1	-0.82072	1.53572	1.45733	0.12525	0.0272413	0.31214	-0.367054	-1.03655	-1.23335	AT5G65030.1		PREDICTED: uncharacterized protein LOC107062102
Storvum018224t1	-1.03919	1.03625	2.08775	-0.571998	0.126083	-0.120793	-0.0325823	-0.855609	-0.629906	AT5G43700.1	AUX/IAA transcriptional regulator family protein	auxin-induced protein 22D-like
Storvum018229t1	0.548847	1.49293	0.12171	0.345682	-0.742824	0.994957	-0.0675036	-1.63067	-1.06313	AT4G25760.1	glutamine dumper 2	protein GLUTAMINE DUMPER 2-like
Storvum018236t1	-0.592064	0.797522	-0.723358	0.62991	-1.06118	1.68924	0.612335	-0.0342203	-1.31819	AT2G23690.1		protein SSUH2 homolog
Storvum018307t1	0.672933	2.04343	0.822345	-0.996037	-0.601443	-0.169432	-0.389508	-0.370454	-1.01184	AT3G46130.4	myb domain protein 48	transcription factor MYB48
Storvum018416t1	0.110831	1.0542	0.442785	-0.238962	-1.10136	1.1678	1.00344	-1.40087	-1.03786	AT2G36100.1	Uncharacterised protein family (UPF0497)	casparian strip membrane protein 1
Storvum018514t1	-0.979385	-0.62475	1.90015	0.12157	0.759082	0.522357	0.24747	-0.641277	-1.30522	AT1G20450.2	Dehydrin family protein	dehydrin COR47-like
Storvum018614t1	0.0378686	1.57067	-0.488504	-0.757243	-1.63499	1.03419	0.824791	-0.542706	-0.0440839	AT1G67650.1	SRP72 RNA-binding domain	signal recognition particle subunit SRP72-like
Storvum018675t1	1.41717	0.805285	-0.142562	0.610336	-1.0824	0.865063	-0.103572	-0.858442	-1.51087	AT2G30710.1	Ypt/Rab-GAP domain of gyp1p superfamily protein	GTPase-activating protein GYP1
Storvum019092t1	0.672231	-0.348416	2.10951	0.324704	-0.1559	0.226794	-0.65109	-1.08071	-1.09712	AT1G21280.1		UBN2_3 domain-containing protein
Storvum019102t1	0.327364	1.80378	0.964377	-0.308667	-1.14631	0.415565	0.00275118	-0.967258	-1.0916	AT4G31730.1	glutamine dumper 1	protein GLUTAMINE DUMPER 2-like
Storvum019164t1	-0.508098	0.930232	0.559997	0.414889	-1.09538	1.76356	-0.291225	-0.427381	-1.3466	AT5G22870.1	Late embryogenesis abundant (LEA) hydroxyproline-rich glycoprotein family	Late embryogenesis abundant protein, LEA-14 protein
Storvum019330t1	0.0426019	1.22184	0.773077	-0.07101	-1.42992	0.466246	1.11006	-1.35321	-0.75969	AT4G02090.1		Multidrug resistance protein ABC transporter family protein, putative
Storvum019404t1	-0.327961	0.14789	0.276748	-0.417197	-0.907604	0.262261	1.17745	-1.73653	1.52494	AT1G56580.1	Protein of unknown function, DUF538	hypothetical protein BC332_32390
Storvum019461t1	0.53174	1.08225	0.810177	0.0589424	0.311044	0.687436	-0.271276	-1.39283	-1.81748	AT3G13650.1	Disease resistance-responsive (dirigent-like protein) family protein	dirigent protein 22-like
Storvum019538t1	-0.198917	1.81136	0.750513	-0.696386	-1.39834	0.97551	-0.246497	-0.7869	-0.210333	AT5G57685.1	glutamine dumper 3	protein GLUTAMINE DUMPER 2
Storvum019651t1	-0.130826	1.39325	0.392044	-1.75826	1.0078	0.288263	-0.682633	-0.997095	0.487453	AT1G18160.1	Protein kinase superfamily protein	serine/threonine-protein kinase EDR1-like isoform X1
Storvum019738t1	-0.293957	0.400578	0.145841	-0.228157	0.260668	2.07206	0.195249	-1.38396	-1.16832	AT2G44840.1	ethylene-responsive element binding factor 13	ethylene-responsive transcription factor 13-like
Storvum019782t1	0.448293	1.48951	0.524283	-0.0858223	-1.09206	0.60946	0.51904	-0.679972	-1.73273	AT3G45060.1	high affinity nitrate transporter 2.6	Polyprotein, putative
Storvum019835t1	0.00995172	0.00608663	1.48581	-0.119008	-0.266974	0.113863	0.779778	0.233529	-2.24304	AT3G15540.1	indole-3-acetic acid inducible 19	auxin-induced protein AUX22-like
Storvum019868t1	0.0784797	1.31077	0.324741	-0.450832	-0.79592	1.10438	0.941824	-1.44131	-1.07213	AT1G14160.1	Uncharacterised protein family (UPF0497)	casparian strip membrane protein 2-like
Storvum019967t1	0.263785	0.367695	1.01337	0.282554	-1.75804	0.842242	0.944024	-1.18393	-0.771699	AT1G71910.1		PREDICTED: uncharacterized protein LOC107061295
Storvum020150t1	0.263203	0.264369	0.438899	-0.217098	0.0821631	2.05629	-0.366769	-1.06868	-1.45238	AT4G03600.1		uncharacterized protein LOC101264375
Storvum020287t1	0.156637	1.51049	-0.171565	-0.341738	0.55682	1.40791	-0.968882	-1.13003	-1.01965	AT1G23120.1	Polyketide cyclase/dehydrase and lipid transport superfamily protein	Major latex protein domain containing protein
Storvum020385t3	0.0381514	0.279452	0.140995	-0.738293	-1.27358	1.16551	0.64562	-1.52982	1.27197	AT2G40113.1	Pollen Ole e 1 allergen and extensin family protein	Non-classical arabinogalactan protein
Storvum020640t1	-0.41953	1.72067	0.661186	-0.59084	-0.74363	1.41357	-0.906454	-0.740881	-0.39409	AT1G60950.1	2Fe-2S ferredoxin-like superfamily protein	ferredoxin, leaf L-A-like
Storvum020652t1	0.939699	-0.369156	0.497044	-0.398763	-0.740458	1.67053	0.35454	-1.75197	-0.201471	AT4G33800.1		GTP pyrophosphokinase
Storvum020715t1	-1.22373	0.0969309	1.65276	-0.860838	0.226578	0.591064	0.340666	0.628637	-1.45207	AT1G14440.2	homeobox protein 31	zinc-finger homeodomain protein 5-like
Storvum020825t1	0.557391	1.37179	0.0472026	0.778466	0.0283629	0.588679	-0.297821	-1.39869	-1.67537	AT2G03420.1		PREDICTED: uncharacterized protein LOC102604404
Storvum020840t1	-0.428337	1.80559	1.67937	-0.479274	-0.486099	-0.227278	-0.421247	-0.710716	-0.732015	AT3G48480.1	Cysteine proteinases superfamily protein	probable ubiquitin-like-specific protease 2B isoform X1
Storvum021060t1	1.24775	1.39454	0.514973	-0.0898783	-0.923554	0.303082	0.107204	-1.33637	-1.21774	AT4G37700.1		uncharacterized protein LOC104645675
Storvum021089t1	0.207287	0.361974	1.38747	-0.260855	0.403613	0.663345	0.40364	-1.41931	-1.74716	AT3G27200.1	Cupredoxin superfamily protein	mavicyanin
Storvum021171t1	0.166161	0.412182	1.08576	-0.323348	0.549408	1.49595	-1.10636	-0.859998	-1.41976	AT1G11570.1	NTF2-like	Nuclear transport factor 2
Storvum021175t1	-0.252931	2.20368	-0.824548	0.0628474	-0.768251	0.695085	0.324541	-0.420318	-1.02011	AT4G03460.1	Ankyrin repeat family protein	protein ACCELERATED CELL DEATH 6-like
Storvum021789t1	0.163497	1.28672	0.698838	-0.872928	-0.379171	1.49322	-1.14448	-1.17424	-0.0714536	AT3G03270.2	Adenine nucleotide alpha hydrolases-like superfamily protein	universal stress protein A-like protein
Storvum021888t1	1.14543	1.72902	0.00964965	-1.53082	-0.685866	-0.814611	0.376402	-0.277385	0.0481784	AT3G50930.1	cytochrome BC1 synthesis	protein HYPER-SENSITIVITY-RELATED 4-like
Storvum021899t2	0.260666	1.31089	0.742171	-0.244138	-0.803885	0.845588	0.644729	-1.25877	-1.49725	AT2G03440.1	nodulin-related protein 1	nodulin-related protein 1-like
Storvum022038t1	0.296832	1.35126	0.814451	-1.12146	1.13258	-0.0198412	-0.202586	-0.733972	-1.51727	ATMG00710.1	Polynucleotidyl transferase, ribonuclease H-like superfamily protein	Retrovirus-related Pol polyprotein from transposon TNT 1-94
Storvum022097t1	0.0259851	0.361579	0.642437	0.346648	-0.0593091	1.85244	-1.12335	-0.501285	-1.54514	AT3G13050.1	Major facilitator superfamily protein	organic cation/carnitine transporter 7-like
Storvum022133t1	0.109453	1.41437	1.4808	0.170135	-0.730278	0.139245	-0.536161	-1.66777	-0.379796	AT3G14470.1	NB-ARC domain-containing disease resistance protein	disease resistance protein
Storvum022311t1	-0.265283	0.806934	1.11687	0.425457	-0.0234561	0.168893	0.859419	-1.14948	-1.93935	AT3G44840.1	S-adenosyl-L-methionine-dependent methyltransferases superfamily protein	PREDICTED: uncharacterized protein LOC107058932
Storvum022615t1	0.118909	0.992922	-0.0457012	-0.985452	0.482554	1.76095	-0.0805823	-0.830602	-1.413	AT5G02640.1		uncharacterized protein LOC101257533
Storvum023084t1	0.0677584	1.07532	0.66856	0.839361	-0.427983	0.741291	0.168796	-1.47108	-1.66203	AT3G59660.1	C2 domain-containing protein / GRAM domain-containing protein	BAG-associated GRAM protein 1-like isoform X2
Storvum023157t1	-2.02054	1.6879	-0.299724	0.950214	0.119812	-0.189008	-0.068174	-0.138494	-0.0419843	AT5G37590.1	Tetratricopeptide repeat (TPR)-like superfamily protein	hypothetical protein BC332_18001
Storvum023217t1	-0.0995394	1.15671	1.2359	-0.379925	0.115621	1.00471	-0.393878	-0.920643	-1.71895	AT5G39950.1	thioredoxin 2	thioredoxin H2-like
Storvum023233t1	-0.0719628	0.584003	2.18466	-0.878455	-0.471022	0.362829	-0.540166	0.0394385	-1.20933	AT5G01870.1	Bifunctional inhibitor/lipid-transfer protein/seed storage 2S albumin superfamily protein	non-specific lipid-transfer protein 1-like
Storvum023433t1	0.0766101	1.34343	1.10367	-0.0291221	-0.828444	0.271569	0.758156	-1.37683	-1.31904	AT1G75750.1	GAST1 protein homolog 1	Snakin-2
Storvum023514t3	-0.321694	1.0071	0.823888	-0.66384	0.376086	1.59761	-0.512739	-0.882719	-1.42369	AT5G39950.1	thioredoxin 2	thioredoxin H2-like
Storvum023633t1	-0.15524	0.51023	-0.173234	-1.35903	-1.27588	1.04275	1.44295	-0.73764	0.705094	AT3G14470.1	NB-ARC domain-containing disease resistance protein	disease resistance protein
Storvum023826t2	0.471021	0.980312	0.757804	-0.376189	-1.76861	1.11575	0.496237	-0.641718	-1.0346	AT1G74410.1	RING/U-box superfamily protein	RING-H2 finger protein ATL2-like
Storvum023996t1	1.05951	1.40411	1.09798	-0.674132	-0.928116	0.0628837	0.0276593	-1.39828	-0.65161	AT5G42200.1	RING/U-box superfamily protein	E3 ubiquitin-protein ligase ATL23-like
Storvum024506t1	-1.19091	0.42883	1.53719	-1.55559	-0.691503	0.679383	-0.121023	0.805595	0.10803	AT4G30460.1	glycine-rich protein	---NA---
Storvum024698t1	-0.141988	0.703831	0.196823	-1.04188	-1.3689	1.58192	1.17292	-0.544416	-0.558311	AT5G65660.1	hydroxyproline-rich glycoprotein family protein	uncharacterized protein At5g65660-like
Storvum024709t1	0.379819	0.733053	0.620205	-1.10614	-2.11691	-0.232859	0.342438	0.461484	0.918911	AT5G42860.1		---NA---
Storvum024828t2	-0.550145	2.04731	0.36354	-0.522587	-0.0477615	-0.340099	-1.08443	1.01515	-0.880979	AT5G07440.2	glutamate dehydrogenase 2	hypothetical protein T459_15503
Storvum024905t1	0.534153	1.88439	0.839162	-0.235279	-0.492467	0.0662589	-0.0946646	-1.15218	-1.34938	AT2G12400.1		mariner transposase
Storvum025062t1	0.955164	0.511727	-0.130711	0.0372419	-0.424347	1.63344	-0.646923	-1.88085	-0.0547425	AT2G45180.1	Bifunctional inhibitor/lipid-transfer protein/seed storage 2S albumin superfamily protein	14 kDa proline-rich protein DC2.15-like
Storvum025079t1	0.857978	0.115963	2.0274	-0.709569	0.561304	-0.514244	-0.426063	-0.804376	-1.10839	AT2G40980.1	Protein kinase superfamily protein	DNA repair protein XRCC2 homolog isoform X1
Storvum025260t1	0.506612	1.26981	-0.284523	-1.11042	-0.299746	-0.203156	0.753981	1.08323	-1.71579	AT1G32120.1		Protein kinase G11A
Storvum026123t1	0.161981	0.877182	-0.0680098	-0.553094	-0.514053	1.88045	0.479882	-1.51917	-0.745171	AT1G71740.1		Acetate kinase
Storvum026566t1	-0.079553	1.78931	1.05138	-0.0157771	-1.1262	-0.147319	-1.15538	0.552893	-0.869348	AT5G14120.1	Major facilitator superfamily protein	protein NUCLEAR FUSION DEFECTIVE 4-like
Storvum026611t1	-0.22857	0.939415	0.128438	-0.571294	0.210089	1.85597	0.170873	-1.43567	-1.06924	AT3G52200.2	Dihydrolipoamide acetyltransferase, long form protein	---NA---
Storvum026612t1	0.771048	1.16781	-0.0444886	-0.309061	-0.497143	0.171611	1.37999	-1.69339	-0.94638	AT3G52790.1	peptidoglycan-binding LysM domain-containing protein	Spore coat assembly protein like
Storvum026625t1	0.153772	0.612778	1.83739	-0.0869212	-0.339104	0.487314	0.0174875	-0.976612	-1.7061	AT1G09710.1	Homeodomain-like superfamily protein	telomeric repeat-binding factor 1
Storvum026929t1	0.828346	1.73188	-0.640473	-0.330866	0.784065	0.129887	-0.30602	-1.67133	-0.525487	NA	NA	---NA---
Storvum027060t1	0.60641	0.961981	0.314795	-0.401589	-0.561008	0.587631	1.21448	-1.91133	-0.811371	AT3G13275.1		Estrogen receptor beta like
Storvum027283t1	-1.60372	0.912699	1.76252	-0.109495	0.262609	-0.371797	-0.396736	0.48188	-0.937962	AT5G62030.1	diphthamide synthesis DPH2 family protein	---NA---
Storvum028167t1	-0.0760334	1.29495	0.10983	-1.50716	-0.70862	1.75656	-0.524165	0.0636486	-0.409016	AT4G23160.1	cysteine-rich RLK (RECEPTOR-like protein kinase) 8	uncharacterized mitochondrial protein AtMg00810-like
Storvum028412t1	-0.291956	1.50827	0.416322	-0.00811288	0.304659	1.26237	-0.562793	-1.25047	-1.37829	AT1G75580.1	SAUR-like auxin-responsive protein family	auxin-induced protein 15A-like
Storvum028956t1	-0.989854	1.74627	-0.583303	-0.338804	-0.997988	0.631493	0.161617	1.1918	-0.821234	AT1G14060.1	GCK domain-containing protein	maintenance of telomere capping protein 1
Storvum029594t2	-0.123106	2.03501	0.890933	-0.409631	-0.86303	0.598202	-0.722233	-1.06988	-0.336264	AT3G61900.1	SAUR-like auxin-responsive protein family	auxin-responsive protein SAUR32
Storvum029725t1	0.165681	0.64281	1.60103	0.24716	-0.766573	-0.0735461	-0.951022	0.804747	-1.67029	AT1G09920.1	TRAF-type zinc finger-related	XIAP-associated factor 1-like isoform X2
Storvum029736t1	-0.226122	2.03766	0.104657	-1.00407	-0.012352	0.313615	-1.57886	0.427297	-0.0618316	AT5G04440.1	Protein of unknown function (DUF1997)	hypothetical protein CQW23_13181
Storvum029860t1	0.388674	0.865938	2.14492	-0.605026	-0.581522	-0.180737	-0.231461	-1.10842	-0.692365	AT3G54720.1	Peptidase M28 family protein	---NA---
Storvum030044t1	-0.0366564	0.782984	1.49326	-1.12776	-0.939769	1.30072	0.134014	-0.802873	-0.803926	AT2G46370.3	Auxin-responsive GH3 family protein	jasmonic acid-amido synthetase JAR1-like
Storvum030652t1	1.19064	-0.454299	-0.433639	-0.471412	-0.210037	0.806667	1.54465	-1.67164	-0.300934	AT4G14622.1	conserved peptide upstream open reading frame 60	---NA---
Storvum030902t1	0.0082966	1.92671	0.142053	-0.769477	-0.0316724	0.295475	0.778573	-0.843484	-1.50648	AT3G48740.1	Nodulin MtN3 family protein	bidirectional sugar transporter N3-like
Storvum031082t1	-0.31266	0.972623	0.746751	0.0354343	-1.30501	1.5941	0.285884	-1.14459	-0.872531	AT5G26710.1	Glutamyl/glutaminyl-tRNA synthetase, class Ic	---NA---
Storvum031130t1	-0.589664	2.18738	0.566739	-0.85819	0.421428	-0.779357	-0.998256	0.141583	-0.0916693	AT2G15110.1	Protein of unknown function, DUF601	---NA---
Storvum031403t1	-0.32512	1.82228	0.614036	0.219191	-1.48861	0.608451	0.212317	-1.09132	-0.57122	AT1G51400.1	Photosystem II 5 kD protein	photosystem II 5 kDa protein, chloroplastic-like
Storvum031634t1	-0.12818	-0.0483215	0.376826	1.25895	-1.94567	1.03089	-1.11372	0.326716	0.242498	AT4G04650.1	RNA-directed DNA polymerase (reverse transcriptase)-related family protein	CLIP-associated protein-like
Storvum031746t1	0.021868	0.832551	1.25385	-1.12659	-1.10051	0.780697	-0.626534	-1.07862	1.04329	AT2G33470.2	glycolipid transfer protein 1	---NA---
Storvum032447t1	-0.284944	0.155105	0.311744	0.931565	0.992481	1.34462	-1.00193	-0.964583	-1.48406	AT5G66020.1	Phosphoinositide phosphatase family protein	phosphoinositide phosphatase SAC6-like
Storvum032860t1	1.46192	-0.0303363	-0.851519	-0.521	-0.837922	0.887034	1.4513	-0.944241	-0.61524	AT4G20520.1	RNA binding;RNA-directed DNA polymerases	Retrovirus-related Pol polyprotein LINE-1
Storvum033301t1	-0.123084	-0.526171	1.65299	-0.108305	-0.617021	0.765649	-1.06071	1.20659	-1.18994	AT5G61190.1	putative endonuclease or glycosyl hydrolase with C2H2-type zinc finger domain	zinc finger protein 385B-like
Storvum034360t1	-0.0644248	0.181648	-0.0582709	-0.561906	1.09667	1.28124	0.893654	-1.09429	-1.67433	NA	NA	---NA---
Storvum034637t2	-0.343316	0.477251	0.943281	-0.553099	0.0668501	-0.45211	1.99188	-1.1434	-0.987339	AT1G20790.1	F-box family protein	---NA---
Storvum035460t1	0.331294	1.069	1.00014	-0.78704	0.821445	-0.0616489	0.445101	-1.03518	-1.78311	AT3G47790.1	ABC2 homolog 7	---NA---
Storvum035532t1	0.185888	-0.35318	1.8465	-0.31427	0.302971	0.595344	0.450332	-1.32891	-1.38468	AT4G39330.1	cinnamyl alcohol dehydrogenase 9	---NA---
Storvum036163t1	-0.336921	0.938289	-0.163916	-1.00706	-0.515478	1.42517	1.37698	-1.24455	-0.472508	AT5G13800.1	pheophytinase	Protein transport protein Sec24-like CEF
Storvum036597t1	0.400976	1.72636	-0.540039	-0.915253	-1.08027	1.33514	-0.712522	-0.460276	0.245893	AT3G20550.1	SMAD/FHA domain-containing protein	---NA---
Storvum036891t1	-0.815778	1.31327	1.96463	0.121457	-0.524438	-0.383835	-0.20071	-1.04181	-0.432777	NA	NA	---NA---
Storvum036999t1	0.141374	1.39561	1.34611	0.0456599	0.184437	0.0747262	-0.401743	-1.13248	-1.65369	AT5G23660.1	homolog of Medicago truncatula MTN3	bidirectional sugar transporter SWEET11-like
Storvum037354t1	-0.244511	2.40535	-0.538898	-1.10149	-0.540599	0.349861	-0.129426	0.215582	-0.415863	AT5G53590.1	SAUR-like auxin-responsive protein family	auxin-induced protein 6B-like
Storvum038061t1	-1.08602	1.87894	-0.716701	0.248212	-0.234302	1.10427	-1.16034	0.199284	-0.233344	AT5G07760.1	formin homology 2 domain-containing protein / FH2 domain-containing protein	---NA---
Storvum039372t1	0.0759481	1.80323	0.761237	-0.364945	0.531677	0.215737	-0.413967	-1.05333	-1.55559	NA	NA	reverse transcriptase with zinc-finger domain
Storvum039954t1	-0.836223	0.722747	0.711663	-0.157008	-1.39681	0.531434	1.68298	-0.188335	-1.07045	AT4G34050.1	S-adenosyl-L-methionine-dependent methyltransferases superfamily protein	caffeoyl-CoA O-methyltransferase
Storvum039985t1	-1.79385	1.26045	1.50972	0.31257	0.0379181	-0.790161	-0.114789	-0.421287	-0.000568194	AT1G17120.1	cationic amino acid transporter 8	---NA---
Storvum040638t1	1.58556	0.165752	-0.63424	-1.84269	-0.328427	1.12658	0.217827	0.166355	-0.456716	NA	NA	---NA---
Storvum040661t1	0.814276	1.96278	-0.554446	-0.63739	-0.0380977	0.763727	-0.639367	-1.27182	-0.399664	AT3G54560.1	histone H2A 11	probable histone H2A variant 1
Storvum040962t1	0.0297538	-0.704847	0.59135	-0.91796	-0.373754	1.50333	1.56598	-0.955136	-0.738713	AT3G01820.1	P-loop containing nucleoside triphosphate hydrolases superfamily protein	probable adenylate kinase 7, mitochondrial
Storvum040985t1	-0.0754812	1.51953	1.04659	-0.680951	0.719205	0.142982	-0.444753	-0.438744	-1.78838	NA	NA	---NA---
Storvum042735t1	0.694561	-0.594415	0.934136	-0.978859	1.03886	0.604004	0.73427	-1.65878	-0.77378	AT3G62580.1	Late embryogenesis abundant protein (LEA) family protein	---NA---
Storvum043401t1	1.40487	1.15923	-0.00404109	-1.72484	0.240539	0.428709	-0.437668	0.0604094	-1.1272	NA	NA	hypothetical protein A4A49_63405
Storvum043410t1	0.0395807	0.41518	0.446168	-0.250001	-0.700866	0.251385	2.02102	-1.58867	-0.633788	AT1G09920.1	TRAF-type zinc finger-related	TRAF-type zinc finger domain-containing protein 1
Storvum043687t1	-0.313358	1.00324	-0.368663	-0.0849691	-0.425807	1.678	0.919985	-1.26966	-1.13877	AT2G15830.1		---NA---
Storvum044293t1	1.43128	-0.521059	0.357558	0.0289177	0.476773	1.32134	-0.777733	-0.7786	-1.53848	NA	NA	---NA---
Storvum044787t1	-1.2909	-0.0719817	1.87496	-0.924828	-0.0533296	-0.390276	0.452274	1.07275	-0.668668	AT5G57150.4	basic helix-loop-helix (bHLH) DNA-binding superfamily protein	---NA---
Storvum044789t1	1.81467	-0.451078	0.8674	-1.22225	-1.00924	0.0242854	0.879507	-0.283493	-0.619799	AT1G17770.1	SU(VAR)3-9 homolog 7	---NA---
Storvum045853t1	0.691684	-1.46211	0.604891	0.493884	-0.860106	1.02192	1.2294	-0.860198	-0.859367	AT5G58770.1	Undecaprenyl pyrophosphate synthetase family protein	RNA-directed DNA polymerase from mobile element jockey-like
Storvum046074t1	-1.28404	2.17006	0.785706	-0.585724	-0.536048	-0.00710372	-0.581108	-0.147987	0.186237	AT5G17180.1		---NA---
Storvum047087t1	0.958749	0.658693	1.0934	0.104067	0.542335	-0.024832	-0.573481	-0.668454	-2.09048	NA	NA	---NA---
Storvum047546t1	0.240109	1.81597	-0.822445	-0.603439	-0.80571	1.03155	-0.800779	0.76231	-0.817567	AT5G44240.1	aminophospholipid ATPase 2	Replication factor C large subunit like
Storvum048254t1	-0.804359	-0.404491	0.896155	1.90847	-0.154979	0.886542	-1.06225	-0.6849	-0.580182	NA	NA	---NA---
Storvum048498t1	1.18471	1.25541	0.307665	-0.782352	-0.927029	0.791329	0.458365	-1.15684	-1.13125	NA	NA	---NA---
Storvum048660t1	0.477413	0.365765	-0.812319	-0.551734	0.101338	1.6271	0.0885905	0.610585	-1.90674	AT3G10260.2	Reticulon family protein	---NA---
Storvum048858t1	0.826543	1.43516	0.291344	-0.106382	0.935812	-0.0946289	-0.469469	-1.204	-1.61438	NA	NA	---NA---
Storvum049721t1	1.99415	0.124181	0.399409	-0.366638	0.0746946	0.663511	-0.396521	-1.29064	-1.20215	AT1G24190.1	SIN3-like 3	---NA---
Storvum050236t1	-0.579581	0.482674	0.710412	0.356969	-1.50827	1.12908	-0.295352	1.10069	-1.39663	AT1G49380.1	cytochrome c biogenesis protein family	Retrovirus-related Pol polyprotein LINE-1
Storvum050698t1	0.64294	1.49085	0.599208	0.200867	0.271578	0.207759	-0.476337	-1.0759	-1.86097	AT5G39785.2	Protein of unknown function (DUF1666)	---NA---
Storvum050801t1	0.0176914	1.8507	0.609659	0.685777	-0.906934	0.269838	-0.561603	-0.43894	-1.52618	NA	NA	---NA---
Storvum051120t1	-1.06752	1.71338	1.51933	-0.0927371	-0.125282	-0.227147	-0.871337	0.0344962	-0.883191	AT2G20480.1		Interleukin-16 like
Storvum051241t1	0.0940211	1.41914	-0.133556	-0.440403	-0.710745	1.78444	-0.748952	-1.23044	-0.033497	NA	NA	---NA---
Storvum051463t1	0.427647	1.27132	0.318952	0.239899	0.670477	0.227368	0.119925	-1.35385	-1.92174	AT5G14110.1	Protein of unknown function (DUF 3339)	---NA---
Storvum051588t1	1.13046	0.880389	0.0842968	-0.994579	0.917146	-0.0755969	0.579701	-0.718706	-1.80311	AT3G47090.1	Leucine-rich repeat protein kinase family protein	---NA---
Storvum051851t2	-0.156324	-0.138987	0.677484	-0.369121	0.692459	1.65385	-0.543343	0.141295	-1.95732	AT1G27700.1	Syntaxin/t-SNARE family protein	PREDICTED: uncharacterized protein LOC107005320
Storvum052295t1	-0.43729	0.811349	2.22161	-0.747151	-0.833908	0.000788666	-0.667626	0.303145	-0.650915	AT2G25440.1	receptor like protein 20	---NA---
Storvum052363t1	0.848734	1.44981	0.769969	-0.165814	-0.648652	0.489635	-0.0432936	-1.703	-0.997383	AT5G24920.1	glutamine dumper 5	protein GLUTAMINE DUMPER 2-like
Storvum053049t1	1.02498	-0.458567	-0.399163	0.205765	0.107045	1.83051	0.116148	-0.883747	-1.54297	AT2G33020.1	receptor like protein 24	---NA---
Storvum053432t1	-1.35178	1.92378	0.338649	-0.401411	-0.184306	1.03967	-0.0698828	-0.302373	-0.992348	AT1G48240.1	novel plant snare 12	---NA---
Storvum054947t1	-0.0763141	1.46454	1.34378	0.106014	-0.504245	0.127224	0.246158	-1.21772	-1.48944	AT4G36180.1	Leucine-rich receptor-like protein kinase family protein	---NA---
Storvum055300t2	1.00161	0.968994	-0.139136	0.0243902	-0.160782	0.287027	1.08675	-1.67532	-1.39353	NA	NA	---NA---
Storvum056136t1	-0.95464	1.75187	0.0495763	-0.180419	1.14559	0.191229	0.237593	-0.935113	-1.30568	AT3G53830.1	Regulator of chromosome condensation (RCC1) family protein	---NA---
Storvum057580t1	-0.817413	2.36969	-0.0997932	-0.298493	0.460552	-0.436928	-0.472941	0.256915	-0.961589	AT2G28450.2	zinc finger (CCCH-type) family protein	---NA---
Storvum057773t1	0.220807	2.13287	0.45494	-0.283993	0.4289	-0.912519	0.00186875	-0.946663	-1.09621	NA	NA	---NA---
Storvum058290t1	-0.60917	0.627841	1.10724	0.046844	-0.92999	0.54266	-1.88698	1.13378	-0.0322252	AT4G31000.2	Calmodulin-binding protein	---NA---
Storvum059118t1	0.0139749	2.5242	0.229776	-0.424915	-0.56689	-0.00625777	-0.684269	-0.453441	-0.632175	AT3G01070.1	early nodulin-like protein 16	---NA---
Storvum059136t1	0.284439	1.08664	1.37098	0.463399	-0.624199	0.160593	0.064124	-1.02372	-1.78226	AT5G23110.1	Zinc finger, C3HC4 type (RING finger) family protein	---NA---
Storvum059156t1	0.53454	1.71389	-0.284181	0.6534	0.0481737	0.591146	-1.12107	-0.632331	-1.50357	AT1G79630.1	Protein phosphatase 2C family protein	---NA---
Storvum059546t1	0.160068	1.06658	1.98282	-1.1633	-0.677589	-0.554821	0.276169	-0.305422	-0.784505	AT4G02580.1	NADH-ubiquinone oxidoreductase 24 kDa subunit, putative	---NA---
Storvum063716t1	0.393067	-0.156377	0.501675	-0.500251	1.28826	1.07276	0.356781	-1.55767	-1.39824	NA	NA	---NA---
Storvum064197t1	2.05578	-0.123871	-0.403775	0.490079	-0.29726	0.710595	-0.253378	-1.49249	-0.68568	NA	NA	---NA---
Storvum064511t1	-0.927362	0.766105	1.70898	-1.31797	-0.911102	-0.460404	0.123853	0.908923	0.108971	NA	NA	---NA---
Storvum064787t1	0.741911	0.0607581	1.46234	-1.4994	0.306574	1.06633	-0.267629	-0.878615	-0.992267	AT5G39230.1	TFIIB zinc-binding protein	---NA---
Storvum065092t1	-0.659304	0.880804	1.50305	-1.04491	0.159168	0.965023	-1.33693	0.307626	-0.774519	AT3G61740.1	SET domain protein 14	histone-lysine N-methyltransferase ATX4-like isoform X2
Storvum065254t1	-0.0143429	2.15695	-0.967338	0.341218	-0.563026	-0.135931	0.617371	-1.24143	-0.193466	AT1G45332.1	Translation elongation factor EFG/EF2 protein	---NA---
Storvum070056t1	1.195	1.25245	1.13931	-1.07452	0.185083	0.0441211	-0.918631	-0.843079	-0.979734	AT2G15530.3	RING/U-box superfamily protein	---NA---
Storvum071600t1	-0.74387	1.5403	1.38232	0.479956	0.196715	-0.218657	-0.797337	-0.410327	-1.4291	AT4G38200.1	SEC7-like guanine nucleotide exchange family protein	---NA---
Storvum073878t1	0.899094	0.425085	1.15145	-0.27843	0.63481	0.730746	-1.65191	-1.1964	-0.714439	AT5G65000.1	Nucleotide-sugar transporter family protein	---NA---
Storvum077568t1	-0.793138	2.27206	-0.625307	-1.04549	-0.08604	0.0885107	0.250509	0.537243	-0.598343	AT3G15357.1		---NA---
Storvum079194t1	-1.84523	1.40753	-0.287268	1.20611	-0.917837	-0.239275	0.102308	0.319022	0.254647	AT3G13320.1	cation exchanger 2	---NA---
Storvum084159t1	0.346277	0.622239	0.902654	-1.27877	-0.0818923	1.46955	-1.42059	0.312718	-0.872185	AT3G20820.1	Leucine-rich repeat (LRR) family protein	---NA---
Storvum089224t1	0.186177	1.9544	0.139275	-0.5086	0.878029	0.192703	-0.474456	-1.30989	-1.05763	AT3G08900.1	reversibly glycosylated polypeptide 3	---NA---
Storvum095537t1	0.381766	0.74774	0.12911	0.249095	-1.34343	0.630729	1.51276	-1.3306	-0.977175	NA	NA	---NA---
Storvum095661t1	0.38372	0.670323	1.23707	-1.93664	-0.998889	0.997761	0.0948229	-0.323562	-0.124599	NA	NA	---NA---
Storvum097480t1	0.88394	1.12101	-0.738455	-0.299661	0.527228	0.159948	1.1019	-1.30162	-1.45428	NA	NA	---NA---
Storvum097559t1	0.313778	1.99535	0.653021	-0.90674	0.24562	0.0896358	-0.421875	-0.490894	-1.4779	AT1G61065.1	Protein of unknown function (DUF1218)	---NA---
Storvum115336t1	0.582169	0.630544	0.93738	-0.656889	0.927487	0.903697	-0.889339	-0.707252	-1.7278	AT5G58000.1	Reticulon family protein	---NA---
Storvum118623t1	0.141279	1.44031	1.20884	-0.548735	-0.13682	0.42178	-0.844849	0.112641	-1.79445	AT5G07710.1	Polynucleotidyl transferase, ribonuclease H-like superfamily protein	---NA---
Storvum126693t1	-0.0847027	2.088	0.717803	-1.0906	0.108359	-0.724944	-0.303158	0.368039	-1.0788	AT5G49510.2	prefoldin 3	---NA---

## Sheet: Cluster 2
	Scaled expression									Arabidopsis (TAIR10) BLASTX hit		NCBI non-redundant database BLASTX hit
Accession	Mock.1d	Mock.2d	Mock.3d	A2-J.1d	A2-J.2d	A2-J.3d	A2-O.1d	A2-O.2d	A2-O.3d	AGI locus code	Short description
Storvum000112t1	1.02921	-0.281475	-0.530069	0.339528	1.88891	-1.07674	-1.17645	0.312975	-0.505888	ATCG01130.1	Ycf1 protein	hypothetical chloroplast RF1 (chloroplast)
Storvum000483t1	-0.369931	-0.241368	-0.238899	-0.690479	0.733867	-0.797752	2.39927	-0.288291	-0.506422	AT2G26910.1	pleiotropic drug resistance 4	ABC transporter G family member 32
Storvum002271t1	1.00588	-1.4357	0.382306	0.798293	1.53987	-0.974494	-0.0452846	-0.554537	-0.716338	AT1G79840.1	HD-ZIP IV family of homeobox-leucine zipper protein with lipid-binding START domain	homeobox-leucine zipper protein GLABRA 2
Storvum002573t1	0.77982	-0.539741	-0.599739	0.862258	1.83078	-1.05011	-1.22235	0.122661	-0.183579	ATCG01010.1	NADH-Ubiquinone oxidoreductase (complex I), chain 5 protein	NADH-plastoquinone oxidoreductase subunit 5 (chloroplast)
Storvum002950t1	0.368964	0.199523	0.428956	0.216916	2.11355	-0.850318	-0.412273	-0.808936	-1.25639	AT3G42170.1	BED zinc finger ;hAT family dimerisation domain	transposase
Storvum003209t1	0.890234	0.337359	0.345196	0.0783338	1.60486	-0.3537	-0.065993	-1.07097	-1.76532	AT1G77010.1	Pentatricopeptide repeat (PPR) superfamily protein	putative pentatricopeptide repeat-containing protein At1g77010, mitochondrial
Storvum006586t1	1.0182	-0.434778	-0.307721	-0.13714	1.74974	-1.36143	0.147434	0.527879	-1.20219	ATCG01050.1	NADH-Ubiquinone/plastoquinone (complex I) protein	NADH-plastoquinone oxidoreductase subunit 4 (chloroplast)
Storvum006619t2	-0.115093	-0.782848	-0.746981	-0.344146	2.29285	0.905061	-0.15123	-0.389066	-0.668547	AT2G24280.1	alpha/beta-Hydrolases superfamily protein	lysosomal Pro-X carboxypeptidase-like
Storvum006858t2	-0.074169	-0.416834	-0.841679	-0.30636	2.31708	-1.05726	0.396686	0.423891	-0.441355	AT4G29040.1	regulatory particle AAA-ATPase 2A	IS21 family transposase
Storvum008563t2	1.01232	0.635063	1.20761	-0.108109	1.03934	-0.986691	-0.479539	-0.908053	-1.41194	AT3G58690.1	Protein kinase superfamily protein	serine/threonine-protein kinase CDL1
Storvum009546t1	0.9702	-0.16414	-0.636459	-1.14872	1.75432	-1.20426	-0.548129	0.514947	0.462234	AT3G17450.1	hAT dimerisation domain-containing protein	PREDICTED: uncharacterized protein LOC104249122
Storvum009799t1	-0.0613921	0.89661	-0.494571	-0.402911	1.95072	0.69289	-0.756173	-0.55025	-1.27492	AT3G25290.2	Auxin-responsive family protein	cytochrome b561 and DOMON domain-containing protein At3g25290-like
Storvum009851t1	-1.05245	-0.153583	-0.633893	1.23582	1.54341	0.975891	-0.591187	-0.226586	-1.09743	AT3G21630.1	chitin elicitor receptor kinase 1	chitin elicitor receptor kinase 1-like
Storvum009960t1	1.10318	-0.234681	0.16768	0.935032	0.916781	0.181927	0.0299193	-1.27923	-1.82061	AT1G28310.1	Dof-type zinc finger DNA-binding family protein	dof zinc finger protein DOF1.4
Storvum010028t1	-0.620415	-0.097201	-0.845039	0.0817195	2.40576	0.0224093	-0.88913	0.361094	-0.419201	AT1G47710.1	Serine protease inhibitor (SERPIN) family protein	serpin-ZX-like
Storvum010481t1	0.350994	1.05194	0.0913379	-0.0733872	1.79138	-1.24784	-1.14554	0.00455874	-0.823449	AT4G10200.1	TTF-type zinc finger protein with HAT dimerisation domain	zinc finger MYM-type protein 1-like
Storvum011441t1	-0.846175	-0.83398	-0.882384	1.87283	1.08824	-0.693378	0.325973	0.499512	-0.530636	AT3G51680.1	NAD(P)-binding Rossmann-fold superfamily protein	Short-chain dehydrogenase reductase 2a
Storvum012159t1	-0.213383	-0.106405	1.23302	1.02904	1.09425	-0.0311553	-0.15526	-1.22522	-1.62489	AT5G62960.1		PREDICTED: uncharacterized protein LOC102592115
Storvum012842t1	0.419515	0.068008	-0.789516	0.643119	2.24918	-0.507929	-0.637869	-0.6344	-0.810112	AT1G11125.1		translation initiation factor IF-2
Storvum013544t1	-0.187106	0.198712	0.33428	-0.240547	1.89361	0.916955	-0.462749	-1.45704	-0.996116	AT5G59350.1		PREDICTED: uncharacterized protein LOC107018823
Storvum013633t1	0.505014	0.485441	1.21517	-0.326497	1.315	-0.757273	0.177552	-1.01198	-1.60242	AT2G41130.1	basic helix-loop-helix (bHLH) DNA-binding superfamily protein	transcription factor bHLH106-like
Storvum013636t1	0.0549318	0.400743	0.94385	0.711887	1.27209	0.163262	-0.551116	-1.53784	-1.45781	NA	NA	Reverse transcriptase/Ribonuclease
Storvum013721t1	0.275657	-0.469796	-0.17393	-0.0918347	1.77647	1.28153	-0.278718	-1.38221	-0.937162	AT3G25590.1		uncharacterized protein LOC101250888
Storvum014083t1	0.922597	0.612058	0.618918	0.541755	1.18148	-0.572517	-0.416069	-1.32172	-1.5665	AT1G11545.1	xyloglucan endotransglucosylase/hydrolase 8	probable xyloglucan endotransglucosylase/hydrolase protein 8
Storvum014868t2	1.11043	-0.243499	0.279863	0.280872	1.36072	0.287981	-0.0533363	-1.3637	-1.65934	AT3G52720.1	alpha carbonic anhydrase 1	alpha carbonic anhydrase 1, chloroplastic
Storvum015472t1	0.0344464	0.395208	0.127271	0.00432177	2.15401	-0.503144	0.134504	-0.888607	-1.45801	AT1G49320.1	unknown seed protein like 1	BURP domain protein USPL1
Storvum015781t1	0.328176	0.751411	-1.26585	0.94746	1.59605	-0.570293	-1.35481	-0.101759	-0.330381	AT1G21580.1	Zinc finger C-x8-C-x5-C-x3-H type family protein	putative movement protein
Storvum015865t1	-1.34544	0.505328	-0.355336	2.00465	0.66448	-0.748277	0.220995	-0.0914637	-0.854935	AT5G66440.1		PREDICTED: uncharacterized protein LOC107059859
Storvum015889t1	0.588568	0.252339	1.33138	-0.0970602	1.29476	-1.3231	-1.20475	0.115085	-0.957224	ATMG00710.1	Polynucleotidyl transferase, ribonuclease H-like superfamily protein	polypeptide with an integrase domain
Storvum016120t1	-0.271699	-0.531818	-1.1531	0.191901	1.58488	0.862146	1.15061	-1.01143	-0.821491	AT4G21705.1	Tetratricopeptide repeat (TPR)-like superfamily protein	pentatricopeptide repeat-containing protein At4g21705, mitochondrial
Storvum016726t3	0.386712	0.0584576	1.13221	0.435198	1.32777	-0.623879	0.126437	-1.13293	-1.70998	AT1G77510.1	PDI-like 1-2	protein disulfide-isomerase-like
Storvum016812t1	0.341063	0.443249	-0.25053	0.781116	1.60086	-1.41168	-1.52305	0.272966	-0.253986	ATCG00380.1	chloroplast ribosomal protein S4	ribosomal protein S4 (chloroplast)
Storvum016896t1	0.169231	0.27531	-1.33798	0.906344	1.78488	0.393959	-0.579604	-1.19817	-0.41397	AT2G37860.1	Protein of unknown function (DUF3411)	probable polyribonucleotide nucleotidyltransferase 1, chloroplastic
Storvum016981t1	0.452081	0.638796	0.703369	0.423921	1.39308	-1.4326	-0.0847889	-0.536622	-1.55724	AT1G18560.1	BED zinc finger ;hAT family dimerisation domain	Phospholipid-transporting ATPase 2
Storvum017040t1	1.5286	0.411247	0.338383	-0.210066	1.00885	-0.407416	0.183767	-1.58043	-1.27292	AT1G66250.1	O-Glycosyl hydrolases family 17 protein	transposon protein, putative, CACTA, En/Spm sub-class
Storvum017046t1	0.654768	-0.588888	-0.0117873	1.55032	1.51123	-1.00882	-0.830105	-0.5511	-0.72562	AT1G19260.1	TTF-type zinc finger protein with HAT dimerisation domain	zinc finger MYM-type protein 1-like
Storvum018400t1	-0.413171	0.133677	0.790573	-0.639164	2.30199	-0.5617	-0.15393	-0.533866	-0.924406	AT5G02440.1		PREDICTED: uncharacterized protein At3g17950-like
Storvum018429t1	-0.701074	0.838404	0.660717	-0.471196	1.80612	-0.0819835	-1.58315	0.128317	-0.596149	AT1G17230.1	Leucine-rich receptor-like protein kinase family protein	probable LRR receptor-like serine/threonine-protein kinase At3g47570
Storvum018437t1	0.718622	-0.099946	-0.54815	0.512385	1.2586	1.11447	-0.137104	-1.19423	-1.62465	AT1G01490.2	Heavy metal transport/detoxification superfamily protein	FK506-binding protein 4-like
Storvum018468t1	0.537297	-0.587966	-0.264993	-0.583761	1.18103	-2.03345	1.06849	0.499312	0.184051	AT1G63410.1	Protein of unknown function (DUF567)	protein LURP-one-related 4-like
Storvum018673t1	0.492792	-1.14041	-0.45632	-0.115172	2.1808	-0.984576	-0.289475	-0.278137	0.590506	AT5G62900.1		Protein TIC like
Storvum018915t1	-0.19552	-0.855479	-0.700028	0.675695	1.68033	-0.834737	0.082164	1.2454	-1.09783	AT1G58170.1	Disease resistance-responsive (dirigent-like protein) family protein	dirigent protein 22-like
Storvum018965t1	-0.507789	-0.183264	-0.894762	2.23805	0.745149	-0.364735	0.184516	-1.0755	-0.141672	AT3G42170.1	BED zinc finger ;hAT family dimerisation domain	zinc finger BED domain-containing protein RICESLEEPER 2-like
Storvum019237t1	-0.448216	0.962098	-1.08175	-0.760375	2.15784	-0.0751111	0.150282	-0.327268	-0.577497	AT1G08060.2	ATP-dependent helicase family protein	PREDICTED: uncharacterized protein LOC107805567
Storvum019421t1	-0.0285515	-0.972136	-0.266412	1.39631	1.711	0.136743	-0.843237	0.0387667	-1.17248	AT5G42905.1	Polynucleotidyl transferase, ribonuclease H-like superfamily protein	PREDICTED: uncharacterized protein LOC107059902
Storvum019424t1	1.19031	-0.934358	-0.360912	0.341022	1.62069	-1.12447	-0.744452	0.719619	-0.707445	AT5G41210.1	glutathione S-transferase THETA 1	PREDICTED: uncharacterized protein LOC107826876
Storvum019614t1	0.841592	0.208071	0.362651	-1.06292	1.69653	0.66372	-0.789473	-0.642626	-1.27755	AT4G23690.1	Disease resistance-responsive (dirigent-like protein) family protein	disease resistance response protein 206-like
Storvum019664t1	1.34229	0.508308	-0.852876	0.389795	1.618	-1.10129	-0.697414	-0.51623	-0.690586	ATCG01100.1	NADH dehydrogenase family protein	NADH-plastoquinone oxidoreductase subunit 1 (chloroplast)
Storvum019889t1	0.568772	-0.640181	0.113934	0.346865	1.72246	0.808639	-0.576949	-1.63742	-0.706119	AT4G27310.1	B-box type zinc finger family protein	zinc finger protein CONSTANS-LIKE 2-like
Storvum020100t1	-1.46297	-0.264403	0.360559	0.93249	1.43898	-0.407556	0.746954	0.0669973	-1.41106	AT1G48720.1		protein trichome birefringence-like 35
Storvum020169t1	-0.0462487	-0.0335223	-0.909322	0.544574	2.10662	-0.0041316	0.244107	-0.418623	-1.48345	AT3G42860.1	zinc knuckle (CCHC-type) family protein	PREDICTED: uncharacterized protein LOC107032682
Storvum020176t1	-0.502333	-0.334603	1.90272	0.373848	0.619342	-0.857595	-0.666875	-1.30864	0.774128	NA	NA	---NA---
Storvum020605t1	1.44644	-0.390253	-0.361861	0.432919	1.64414	-1.31553	-0.922236	-0.194443	-0.339173	NA	NA	---NA---
Storvum021468t1	-0.350385	-0.0490913	-0.112589	0.0671025	2.52691	-0.289017	-0.19939	-0.597501	-0.996036	AT1G49310.1		Organ specific protein
Storvum021538t1	0.0285147	0.558319	1.07607	-0.198682	1.55505	-1.03675	0.253406	-0.65259	-1.58334	AT3G09280.1		PREDICTED: uncharacterized protein LOC109208818
Storvum021652t1	0.568957	-0.465255	-0.364558	-0.530645	2.21087	-0.515006	-1.1216	-0.443909	0.66115	NA	NA	---NA---
Storvum021724t1	0.696305	-0.0585166	-1.90941	0.321212	1.25287	-0.968642	1.08044	-0.235597	-0.178666	AT5G08020.1	RPA70-kDa subunit B	replication protein A 70 kDa DNA-binding subunit B-like
Storvum021765t1	0.457494	-0.0685811	-0.462634	0.134221	2.10389	-0.240987	-1.1969	-1.19182	0.465319	AT5G51260.1	HAD superfamily, subfamily IIIB acid phosphatase	acid phosphatase 1-like
Storvum021872t2	-0.318164	1.46127	-0.400958	0.278561	1.83994	-0.822954	-0.765191	-0.819732	-0.452768	AT3G25905.1	CLAVATA3/ESR-RELATED 27	CLAVATA3/ESR (CLE)-related protein 27-like
Storvum022046t1	-0.270362	1.55537	-0.649791	-0.261941	1.80005	-1.1393	-0.10587	-0.328538	-0.599618	AT4G23160.1	cysteine-rich RLK (RECEPTOR-like protein kinase) 8	ion channel CASTOR-like
Storvum022088t1	-0.953681	0.425106	0.813007	0.180705	1.78141	-1.52923	-0.718065	0.307404	-0.306653	ATCG00660.1	ribosomal protein L20	ribosomal protein L20 (chloroplast)
Storvum022107t1	0.744185	0.357471	1.09918	-0.306187	1.27806	-0.00835736	-0.618505	-0.656587	-1.88926	AT2G40435.1		transcription factor SCREAM2
Storvum022152t1	1.1498	-1.20211	0.696369	0.199589	1.31027	-1.05407	-0.487743	0.546892	-1.15899	AT2G07760.1	Zinc knuckle (CCHC-type) family protein	hypothetical protein CQW23_33091
Storvum022306t1	-0.964419	-0.427481	0.813897	-0.766758	2.11184	0.589071	-0.142143	-0.416205	-0.797805	AT4G30860.1	SET domain group 4	PREDICTED: LOW QUALITY PROTEIN: uncharacterized protein LOC102594253
Storvum022374t1	-0.507598	-0.303128	2.17792	-0.0300764	0.805402	-0.541808	-0.025683	-0.186289	-1.38874	AT3G51750.3		cilia- and flagella-associated protein 251
Storvum022454t1	0.905974	-1.45362	-0.59398	-0.416472	1.78536	-0.918806	0.316124	0.598687	-0.223274	AT4G08580.1	microfibrillar-associated protein-related	PREDICTED: uncharacterized protein LOC102581414 isoform X1
Storvum022649t1	0.234666	0.181264	-0.9959	0.158828	1.8907	-0.838622	-0.885459	1.0761	-0.821572	AT1G53720.1	cyclophilin 59	peptidyl-prolyl cis-trans isomerase CYP59
Storvum022898t1	1.4436	-0.490841	-0.96818	-0.852969	1.85202	0.0582018	-0.624565	0.0145871	-0.431855	NA	NA	PREDICTED: uncharacterized protein LOC102583839
Storvum023412t1	-0.85283	0.0674514	-0.384632	1.52812	1.36035	0.151877	0.235061	-0.487118	-1.61829	AT4G34670.1	Ribosomal protein S3Ae	40S ribosomal protein S3a-like
Storvum023811t1	-0.537894	-0.562281	1.28111	0.1895	1.62784	-0.883849	0.523529	-0.239859	-1.3981	AT5G66985.1		hypothetical protein A4A49_10332
Storvum023840t1	0.0810844	0.536596	0.503859	0.138316	1.9957	-0.374177	-0.627843	-0.693022	-1.56051	AT5G15600.1	SPIRAL1-like4	---NA---
Storvum023868t1	-1.31881	0.343104	1.85869	0.392118	0.326493	-0.557236	-1.09241	0.703329	-0.655275	AT4G18760.1	receptor like protein 51	receptor-like protein 51
Storvum023895t1	0.272383	-0.0579585	-0.178839	-1.02617	1.55387	-1.53355	0.288867	1.27759	-0.596192	AT1G42190.1	GAG/POL/ENV polyprotein	Putative retrotransposon protein, identical
Storvum023937t1	0.338636	-0.0907419	2.00975	0.373073	0.653637	-0.238072	-0.90903	-1.29737	-0.839878	AT4G13970.1	zinc ion binding	---NA---
Storvum024121t1	0.388853	1.04566	-0.365847	0.776423	1.3695	-0.198447	-0.232272	-1.0962	-1.68766	AT2G23440.1		hypothetical protein BC332_03669
Storvum024147t1	0.0888308	-0.739231	-0.546891	0.410209	1.92561	-0.10157	-1.51441	0.891638	-0.414181	AT5G10860.1	Cystathionine beta-synthase (CBS) family protein	CLIP-associated protein-like
Storvum024357t1	1.18748	0.638924	-0.229898	-0.969902	1.1985	-0.255169	-1.2727	-1.15426	0.857037	AT2G22810.1	1-aminocyclopropane-1-carboxylate synthase 4	---NA---
Storvum024459t1	0.568669	0.700262	1.16771	0.157658	1.30167	-0.658451	-0.746757	-1.31736	-1.17339	AT1G15110.1	phosphatidyl serine synthase family protein	CDP-diacylglycerol--serine O-phosphatidyltransferase 1-like isoform X1
Storvum024600t1	0.145746	-0.0915885	1.69306	-0.453572	1.08533	-1.03453	0.716359	-1.11225	-0.948553	AT3G51330.1	Eukaryotic aspartyl protease family protein	aspartyl protease family protein 1-like
Storvum024623t1	0.820637	-0.378181	-1.05567	-1.16175	1.30095	-0.30643	0.173815	1.46926	-0.862622	AT1G21580.1	Zinc finger C-x8-C-x5-C-x3-H type family protein	DNA ligase 1-like
Storvum024801t1	0.0149238	-0.505613	0.892529	0.082956	2.21026	-0.704911	-0.793791	-0.27203	-0.924327	AT3G24255.1	RNA-directed DNA polymerase (reverse transcriptase)-related family protein	putative ribonuclease h protein
Storvum024908t1	-0.379858	1.40211	-0.150905	0.736749	1.50521	-0.292211	-0.78352	-0.642336	-1.39524	AT2G32810.1	beta galactosidase 9	Beta-galactosidase 9
Storvum024953t1	1.06823	-1.52806	-0.409719	0.305862	1.69237	-0.856873	-0.0233307	0.438225	-0.686701	AT3G24255.1	RNA-directed DNA polymerase (reverse transcriptase)-related family protein	clip-associated protein
Storvum025278t1	0.267397	0.589877	0.97012	-0.304818	1.6958	-1.08115	-0.687451	-1.42431	-0.0254691	AT5G02960.1	Ribosomal protein S12/S23 family protein	40S ribosomal protein S23
Storvum025389t1	0.454514	-0.488759	1.69794	0.744859	0.985128	-1.20081	-0.850624	-0.871047	-0.471195	AT5G44640.1	beta glucosidase 13	furcatin hydrolase-like
Storvum025805t1	1.2997	-0.216493	-0.394935	-0.547252	2.1122	-0.49316	-0.629613	-0.75028	-0.380166	NA	NA	---NA---
Storvum026055t1	-0.134862	-0.486237	-0.655176	-0.0854573	2.55493	-0.219302	-0.359366	0.148314	-0.762843	AT1G10540.1	nucleobase-ascorbate transporter 8	nucleobase-ascorbate transporter 6-like
Storvum026261t2	1.42077	-1.77255	-0.250575	-0.456628	1.49444	-0.370302	-0.0937172	-0.29275	0.321316	AT4G12460.1	OSBP(oxysterol binding protein)-related protein 2B	GATA transcription factor 26-like
Storvum026564t1	0.668548	-0.944775	-0.490786	0.327756	2.21118	-0.635776	0.24756	-0.693004	-0.690705	AT1G48900.2	Signal recognition particle, SRP54 subunit protein	Signal recognition particle 54 kDa protein 2
Storvum026641t1	-0.717624	-0.0465596	1.13299	1.33236	1.34115	-1.20109	-0.530531	-0.800688	-0.510008	AT3G60260.4	ELMO/CED-12 family protein	ELMO domain-containing protein C-like isoform X1
Storvum027025t1	0.494336	-0.288035	-0.364772	0.761754	2.01709	-1.54004	-0.621128	-0.347319	-0.111881	AT5G48800.1	Phototropic-responsive NPH3 family protein	---NA---
Storvum027253t1	1.22818	-0.524196	0.63757	0.109803	1.1862	-1.35033	0.718319	-0.860091	-1.14545	AT2G41710.2	Integrase-type DNA-binding superfamily protein	---NA---
Storvum027301t1	0.175069	-0.464613	-0.477777	-0.19414	2.39597	-1.28419	-0.261215	-0.052585	0.163483	AT5G65205.1	NAD(P)-binding Rossmann-fold superfamily protein	---NA---
Storvum027606t1	1.26478	-0.597103	0.745585	0.00338537	1.47785	-0.95066	0.0612651	-0.563166	-1.44194	NA	NA	---NA---
Storvum028131t2	-0.181117	0.386062	-1.8007	1.06416	1.3455	0.0981232	-1.03346	0.584062	-0.462634	AT1G76065.1	LYR family of Fe/S cluster biogenesis protein	LYR motif-containing protein
Storvum028340t1	0.0459719	0.750182	-1.08118	-0.565563	2.06848	-0.692168	-0.308817	0.622883	-0.839789	AT3G18020.1	Pentatricopeptide repeat (PPR) superfamily protein	pentatricopeptide repeat-containing protein At3g18020
Storvum028458t1	-0.381713	0.702273	1.68591	-0.00296432	1.11158	-0.948321	-0.470796	-0.246278	-1.44969	AT5G54510.1	Auxin-responsive GH3 family protein	indole-3-acetic acid-amido synthetase GH3.6-like
Storvum028606t1	0.3226	0.0206544	-0.962667	0.183623	2.11113	-1.10745	-0.902956	0.603574	-0.268507	AT2G36380.1	pleiotropic drug resistance 6	---NA---
Storvum028649t1	-0.674845	-0.61333	-0.913873	0.539756	2.18604	-0.128374	0.497402	0.101661	-0.994439	AT3G50610.1		hypothetical protein BC332_03669
Storvum028718t1	0.115245	1.40996	-0.4672	-0.349641	1.90296	-0.653876	-0.255572	-0.631975	-1.0699	AT1G64780.1	ammonium transporter 1;2	ammonium transporter 1 member 2
Storvum028738t1	0.367907	-0.226936	-1.65277	0.505205	1.31249	-1.1442	0.421857	1.0828	-0.66636	AT5G56190.1	Transducin/WD40 repeat-like superfamily protein	uncharacterized WD repeat-containing protein C2A9.03-like
Storvum029314t1	0.141412	-0.298132	-0.950386	-0.376716	1.9097	-0.80475	0.043388	1.28426	-0.948778	NA	NA	---NA---
Storvum029579t1	-1.06619	0.543992	0.9643	-0.313211	0.996022	-0.872482	1.44602	-0.493743	-1.2047	AT1G09920.1	TRAF-type zinc finger-related	XIAP-associated factor 1-like
Storvum029683t2	0.340124	-0.276678	-0.297325	-0.229185	2.42574	-0.977591	-0.907529	-0.0261677	-0.0513887	NA	NA	---NA---
Storvum029905t1	0.324044	0.0384995	-0.727696	-0.268995	2.18482	-0.790651	-0.787365	0.811401	-0.784054	AT1G72560.3	ARM repeat superfamily protein	---NA---
Storvum029963t1	1.12624	0.209527	-0.212895	0.0485684	1.78485	-0.753334	0.137797	-0.91714	-1.42361	AT3G27280.1	prohibitin 4	---NA---
Storvum030406t1	-0.6863	-0.17109	-0.658652	1.50509	1.27437	0.958577	-1.26789	-0.78931	-0.164798	AT3G20390.1	endoribonuclease L-PSP family protein	reactive Intermediate Deaminase A, chloroplastic
Storvum030827t1	1.26952	-0.119293	0.206382	-0.0652048	1.84763	-0.976972	-0.822739	-0.230766	-1.10855	AT2G07215.1		---NA---
Storvum031145t1	-1.41638	-0.466994	0.4122	1.12004	1.76055	-0.343304	-0.292412	0.225184	-0.998889	AT3G54650.1	RNI-like superfamily protein	F-box/LRR-repeat protein 17
Storvum031216t1	0.650722	-0.467972	-0.367501	-0.929885	2.05953	0.24945	0.627018	-0.878518	-0.942848	NA	NA	---NA---
Storvum031609t1	-0.631504	0.0211382	0.0541681	0.0475558	2.41595	-0.610642	-1.17181	-0.0128986	-0.111962	AT1G69770.1	chromomethylase 3	---NA---
Storvum031711t2	0.360784	-0.738243	-0.675742	0.613782	1.42066	-1.00443	1.51746	-0.596788	-0.89748	AT1G43760.1	DNAse I-like superfamily protein	putative acyl-activating enzyme 19
Storvum031765t1	-0.970033	0.966435	0.611194	-0.0844094	2.01766	-0.649402	-0.658871	-0.786477	-0.446101	NA	NA	---NA---
Storvum031903t1	-0.596458	0.192231	-0.527647	0.246941	2.1241	0.483165	-1.34622	0.23367	-0.809782	AT3G10480.1	NAC domain containing protein 50	---NA---
Storvum031976t1	1.26927	0.00976801	-0.148664	0.825066	1.41061	-0.760535	-0.133436	-1.38502	-1.08706	AT1G27220.1	paired amphipathic helix repeat-containing protein	putative ribonuclease h protein
Storvum032384t1	0.0200923	-0.109676	1.32624	0.822441	1.14915	0.247747	-0.804138	-1.38713	-1.26473	AT5G24180.1	Lipase class 3-related protein	---NA---
Storvum032446t2	0.208135	0.976031	-0.518078	-0.982941	1.35132	-1.04895	0.451092	0.909589	-1.3462	AT1G50450.1	Saccharopine dehydrogenase	---NA---
Storvum032881t1	1.50891	-0.857344	0.00361098	0.389752	1.44067	-0.574453	-1.18457	-0.981174	0.254601	AT2G18470.1	roline-rich extensin-like receptor kinase 4	---NA---
Storvum033171t1	0.116312	-0.442689	-1.70172	0.838579	1.50285	-0.0910991	-0.335732	-0.893359	1.00686	AT1G23230.2		---NA---
Storvum033217t2	-1.32085	1.24131	0.947763	-0.640656	1.3595	0.156855	-0.776283	-0.00309954	-0.964539	AT2G37050.3	Leucine-rich repeat protein kinase family protein	probable LRR receptor-like serine/threonine-protein kinase At1g67720
Storvum033814t1	-0.189586	0.155921	1.46054	-0.48139	1.07586	0.916827	-1.48154	-0.327735	-1.12889	AT3G13235.2	ubiquitin family protein	---NA---
Storvum033850t1	0.117615	0.637699	1.05188	-0.807489	1.82986	-0.469832	-0.609585	-0.457474	-1.29267	AT2G06255.1	ELF4-like 3	protein ELF4-LIKE 3
Storvum033889t1	0.74376	-0.368562	-1.11866	-0.628049	2.20069	-0.772946	-0.358721	0.309708	-0.0072187	AT1G76065.1	LYR family of Fe/S cluster biogenesis protein	LYR motif-containing protein
Storvum033981t1	0.613447	0.279366	-1.46031	0.840754	1.46403	-0.380905	0.00666367	0.181266	-1.54431	NA	NA	---NA---
Storvum034001t2	1.33318	0.186354	0.272256	0.00597111	1.6784	-1.08665	-1.15393	-0.515251	-0.720339	ATCG00070.1	photosystem II reaction center protein K precursor	photosystem II protein K (chloroplast)
Storvum034337t1	0.476301	-0.0450499	0.517493	-0.185318	2.09114	-0.358072	-0.770181	-0.198094	-1.52822	AT2G33060.1	receptor like protein 27	---NA---
Storvum034377t1	0.275359	-0.0958013	0.203253	1.12225	1.46939	-0.661767	0.447444	-1.4428	-1.31732	NA	NA	---NA---
Storvum034379t4	0.35988	-1.30926	-1.30502	0.872728	1.79391	-0.51618	-0.0749265	-0.215046	0.39391	AT2G20320.1	DENN (AEX-3) domain-containing protein	PREDICTED: uncharacterized protein LOC109218896
Storvum034429t1	-0.136594	-0.0492099	0.645713	-0.288862	1.9331	-1.66135	0.0581165	-0.90342	0.402508	NA	NA	---NA---
Storvum034454t1	-0.782415	-0.0414959	0.112907	-0.108983	2.43565	0.0703343	-0.924455	-0.754622	-0.00692425	NA	NA	---NA---
Storvum034554t1	0.907121	-1.14946	1.5197	-0.674346	1.17266	-0.677204	0.209636	-0.230742	-1.07737	AT5G54670.1	kinesin 3	---NA---
Storvum034700t1	-0.838825	-0.0712614	-1.6864	0.840941	1.6485	0.702003	0.28642	-0.268384	-0.612994	AT3G24255.1	RNA-directed DNA polymerase (reverse transcriptase)-related family protein	CLIP-associated protein-like
Storvum034886t1	0.0818385	0.400564	0.315148	0.511295	2.07429	-0.711412	-0.5032	-0.912745	-1.25578	AT1G26945.1	basic helix-loop-helix (bHLH) DNA-binding superfamily protein	transcription factor PRE6-like
Storvum034934t1	-0.156137	0.265067	1.2514	-0.141568	1.49554	0.130094	-0.133756	-0.922825	-1.78781	AT5G22580.1	Stress responsive A/B Barrel Domain	stress-response A/B barrel domain-containing protein At5g22580
Storvum034970t1	0.0701198	-0.768492	1.51623	0.0340135	0.804033	-1.39097	-0.464017	1.16913	-0.970043	AT3G05040.1	ARM repeat superfamily protein	Protein transport protein Sec24-like CEF
Storvum034991t1	0.367524	1.37766	-0.911845	-0.421459	1.54424	0.374403	-0.405533	-0.506568	-1.41843	AT1G78880.1	Ubiquitin-specific protease family C19-related protein	uncharacterized membrane protein At1g16860-like
Storvum035473t1	0.952572	-0.0476963	-1.60079	0.392897	1.74584	-0.0203227	-0.965447	0.15129	-0.608351	NA	NA	---NA---
Storvum035616t1	-0.529662	-0.0596885	-0.485158	0.301473	2.43197	0.350266	-0.602962	-0.694101	-0.712137	AT5G17910.2		---NA---
Storvum035736t1	-0.904378	1.76497	0.374319	0.570776	0.9846	-1.07405	-1.07798	-0.0821132	-0.55614	AT4G22330.1	Alkaline phytoceramidase (aPHC)	---NA---
Storvum036230t1	0.65221	-0.56188	-0.394979	0.826458	1.72015	-1.50937	-1.00032	0.404285	-0.13655	AT3G54380.3	SAC3/GANP/Nin1/mts3/eIF-3 p25 family	protein chromatin remodeling 20
Storvum036244t1	-0.586348	1.76515	-0.452794	-0.284212	0.976602	-0.897251	0.938234	-1.2544	-0.204988	AT5G04110.1	DNA GYRASE B3	AT-rich interactive domain-containing protein 2-like
Storvum036401t1	-0.677008	0.292747	0.604538	1.563	1.01125	-1.2926	0.364201	-1.13335	-0.732771	AT5G26360.1	TCP-1/cpn60 chaperonin family protein	---NA---
Storvum036686t1	0.0296219	-0.575445	0.127778	-0.304801	2.4942	-0.203424	0.0272025	-0.68951	-0.905626	AT3G11720.2	Polyketide cyclase/dehydrase and lipid transport superfamily protein	---NA---
Storvum036739t1	1.21325	-0.527984	0.473432	0.444196	1.4736	-0.217581	-0.669058	-0.477041	-1.71282	AT3G05936.1		TRNA-specific 2-thiouridylase
Storvum036776t2	0.660779	0.240994	-0.496384	0.113889	2.22951	-0.663719	-0.852369	-0.198978	-1.03372	NA	NA	---NA---
Storvum036782t2	0.754779	-1.01607	0.0674896	0.452267	1.86613	0.276093	-0.634946	-0.304913	-1.46083	AT1G17820.1	Putative integral membrane protein conserved region (DUF2404)	---NA---
Storvum036833t1	-0.00120439	0.082413	-0.935094	-0.613811	1.39337	0.0783539	1.13372	0.62735	-1.76509	AT1G27220.1	paired amphipathic helix repeat-containing protein	putative ribonuclease h protein
Storvum036956t1	0.660992	-0.126556	0.567295	-0.0598736	1.65861	-0.294581	-2.05887	0.032299	-0.379317	NA	NA	putative ubiquitin-like-specific protease 2b
Storvum037262t1	0.390292	1.58552	0.409914	-1.16325	1.38495	-0.698249	-0.29089	-0.889635	-0.728653	AT3G10150.1	purple acid phosphatase 16	---NA---
Storvum037411t1	0.175559	-0.462418	-1.08977	-0.786822	2.16623	0.19933	0.198724	-0.940872	0.540032	AT1G40390.1	DNAse I-like superfamily protein	PREDICTED: uncharacterized protein LOC104241241
Storvum037624t1	1.15389	-2.08811	-0.211479	0.134662	0.939769	-0.981795	0.212681	0.415989	0.424398	AT1G21280.1		Eukaryotic translation initiation factor 4G
Storvum037997t1	-0.539776	0.843141	-0.283967	1.1716	1.59245	-0.784867	-1.49736	-0.139097	-0.36212	AT2G37500.2	arginine biosynthesis protein ArgJ family	arginine biosynthesis bifunctional protein ArgJ, chloroplastic isoform X2
Storvum038092t1	-0.235899	-0.0449914	-0.283837	-1.00144	2.23172	-0.394549	-0.523715	0.967916	-0.7152	AT1G17080.1	Ribosomal protein L18ae family	60S ribosomal protein L18a-like protein
Storvum038122t1	-0.192295	-0.486572	-0.42225	0.130158	2.60428	-0.489894	-0.472847	-0.161611	-0.508971	AT4G34450.1	coatomer gamma-2 subunit, putative / gamma-2 coat protein, putative / gamma-2 COP, putative	Coatomer subunit gamma-2
Storvum038169t1	-1.52325	1.5275	0.316753	-0.428131	1.35431	-0.239518	0.377152	-0.879718	-0.505102	NA	NA	---NA---
Storvum038395t1	0.25686	0.0682216	-0.104218	0.400012	2.01652	-0.841079	0.478009	-0.845663	-1.42867	AT1G35610.1	Cysteine/Histidine-rich C1 domain family protein	---NA---
Storvum038487t1	1.10649	0.420676	0.732618	-0.0937499	1.18183	-0.225335	-0.182545	-1.11603	-1.82396	AT1G61370.1	S-locus lectin protein kinase family protein	Pentatricopeptide repeat-containing protein, chloroplastic
Storvum038502t1	-0.171089	0.814334	1.12171	-1.31266	1.36466	0.264894	-1.35341	0.0209863	-0.749429	AT2G30400.1	ovate family protein 2	PREDICTED: uncharacterized protein LOC107022255
Storvum038590t1	0.667812	-0.020266	-1.30348	0.0021278	1.74949	-1.01727	-0.191477	-0.869733	0.982794	AT5G63520.1		---NA---
Storvum038811t1	0.149737	0.528716	0.00752504	-0.700168	2.34011	-0.615517	-0.948602	-0.0956565	-0.66615	AT5G49810.1	methionine S-methyltransferase	---NA---
Storvum038864t1	1.10468	-0.545495	-0.0697142	-0.419389	1.7369	0.798559	-0.708605	-1.36413	-0.532805	AT3G09820.1	adenosine kinase 1	adenosine kinase 2-like
Storvum038876t1	-0.773024	-0.272958	1.52038	0.54033	1.42568	0.109646	-0.294939	-1.28579	-0.969322	AT1G10300.1	Nucleolar GTP-binding protein	---NA---
Storvum038938t1	-0.132146	1.24161	0.891176	0.274198	1.37608	-0.791117	-0.644396	-0.805314	-1.41008	AT3G27830.1	ribosomal protein L12-A	---NA---
Storvum039310t1	-1.22619	0.0652794	-0.0862294	-0.362036	2.17745	-0.0784968	0.607622	0.0147249	-1.11212	NA	NA	---NA---
Storvum039377t1	-0.0431323	-0.0212611	0.0597239	0.213307	1.5368	-0.704832	-0.800628	1.36666	-1.60664	AT5G59250.1	Major facilitator superfamily protein	ion channel CASTOR-like
Storvum039532t1	0.246714	0.841449	-0.739858	-0.53132	1.80674	0.578403	-1.59931	-0.123825	-0.478986	AT5G17230.3	PHYTOENE SYNTHASE	---NA---
Storvum039876t1	-0.983538	-0.340731	0.456239	0.23344	1.00194	0.459751	-0.535994	1.45272	-1.74383	AT1G50060.1	CAP (Cysteine-rich secretory proteins, Antigen 5, and Pathogenesis-related 1 protein) superfamily protein	---NA---
Storvum039878t1	0.222087	-0.169614	-0.0791379	-0.347331	2.52442	-0.247037	-0.395068	-0.570202	-0.938118	NA	NA	---NA---
Storvum039974t1	0.44504	0.153855	1.01361	0.589655	1.62256	-0.984185	-0.71077	-1.18464	-0.94513	AT4G13630.2	Protein of unknown function, DUF593	---NA---
Storvum040080t1	-0.0513696	0.306633	0.2834	-1.26525	2.08919	-0.503144	-0.912506	0.647101	-0.594055	AT1G15060.1	Uncharacterised conserved protein UCP031088, alpha/beta hydrolase	---NA---
Storvum040124t1	0.0149371	-0.315179	-0.813521	1.01051	1.83972	0.552924	-0.0444721	-1.07057	-1.17435	NA	NA	hypothetical protein BC332_05694
Storvum040212t1	1.43442	-0.537282	-0.0448398	-1.13044	1.84617	-0.595011	-0.151992	-0.764999	-0.0560245	AT1G51480.1	Disease resistance protein (CC-NBS-LRR class) family	---NA---
Storvum040350t1	-0.246611	-0.782976	1.03076	-0.277558	2.12628	-0.922384	-0.770337	0.244683	-0.401857	NA	NA	---NA---
Storvum040634t1	-0.79533	-0.714289	0.458954	0.567507	1.41196	-1.96745	0.0959635	0.414274	0.528407	NA	NA	putative late blight resistance protein homolog R1A-3
Storvum040757t1	0.4817	-0.661355	0.431322	0.0098916	1.63691	-1.94577	-0.224905	0.679837	-0.407629	AT5G07760.1	formin homology 2 domain-containing protein / FH2 domain-containing protein	---NA---
Storvum040861t1	0.590517	-0.103573	-0.154047	0.144788	2.11273	-0.702602	-1.38628	0.292845	-0.794384	ATCG00790.1	ribosomal protein L16	50S ribosomal protein L16, chloroplastic
Storvum040886t1	-1.85974	1.27059	0.299185	-0.179271	1.56475	-0.159047	-0.200562	-0.469358	-0.266546	AT5G66980.1	AP2/B3-like transcriptional factor family protein	---NA---
Storvum041096t1	-1.0248	-0.0275272	-0.57236	-0.383559	1.76578	0.754511	1.17064	-0.81968	-0.863004	NA	NA	---NA---
Storvum041709t1	-1.98797	0.890935	0.120186	1.15311	0.383358	-1.08847	0.742729	-0.0629204	-0.150963	AT5G09890.1	Protein kinase family protein	serine/threonine-protein kinase 38-like
Storvum041778t1	1.4204	-0.486802	-0.272704	0.226491	1.63289	-1.0658	-0.580383	0.304133	-1.17823	NA	NA	---NA---
Storvum041875t1	-0.85166	-0.166309	0.74422	-0.041987	2.30123	-0.647903	-0.944437	-0.254394	-0.138765	AT5G08650.1	Small GTP-binding protein	---NA---
Storvum042054t1	0.580161	-0.74157	0.613784	-0.0313618	1.52138	-0.354259	-1.39594	0.982917	-1.17512	AT4G00110.1	UDP-D-glucuronate 4-epimerase 3	---NA---
Storvum042068t1	0.977423	0.0362101	0.711069	-0.243966	1.55647	-1.53642	0.279161	-1.01837	-0.761587	AT3G06290.1	SAC3/GANP/Nin1/mts3/eIF-3 p25 family	---NA---
Storvum042163t1	-0.30618	-0.135177	-0.318601	-0.706633	2.42293	0.626251	-0.201593	-0.813236	-0.567764	AT4G32410.1	cellulose synthase 1	---NA---
Storvum042167t1	0.504798	0.603442	1.04999	-0.0705014	1.47139	-0.877578	-0.103623	-1.23965	-1.33827	AT1G44760.1	Adenine nucleotide alpha hydrolases-like superfamily protein	uncharacterized protein LOC101260545
Storvum042196t1	1.07412	-0.68763	-0.0479133	-0.42847	1.87179	-1.11457	-0.981458	-0.306122	0.620261	AT5G17680.1	disease resistance protein (TIR-NBS-LRR class), putative	TMV resistance protein N-like
Storvum042419t1	0.409688	-0.0629966	0.499901	1.14875	1.50192	-1.26944	-1.21487	-0.0578831	-0.955071	AT2G16365.2	F-box family protein	---NA---
Storvum042483t1	-0.323644	-0.24376	0.966191	1.18459	1.12387	-0.521686	0.513563	-1.18009	-1.51903	AT1G67900.3	Phototropic-responsive NPH3 family protein	BTB/POZ domain-containing protein At1g67900-like
Storvum042529t2	-1.41734	0.168245	0.262017	-0.359753	1.48386	-0.43137	0.392628	1.21929	-1.31758	NA	NA	---NA---
Storvum042554t1	-0.53514	0.198913	-0.660065	-0.411894	2.41333	-0.181171	-0.598614	-0.756112	0.530757	AT3G57870.1	sumo conjugation enzyme 1	---NA---
Storvum042638t1	-0.215216	-0.0246672	1.12738	0.772553	1.19182	-0.586719	0.375999	-1.90852	-0.732624	AT3G20510.1	Transmembrane proteins 14C	clip-associated protein
Storvum042972t1	0.199909	1.27543	0.553096	0.0362276	1.29549	-1.5271	-1.08732	-0.899865	0.154126	AT1G16830.1	Pentatricopeptide repeat (PPR) superfamily protein	chorismate mutase 1, chloroplastic
Storvum042983t1	-0.548693	1.39577	0.320164	0.364657	1.61022	-0.798723	-1.17682	-0.25225	-0.914326	AT2G35750.1		---NA---
Storvum042991t1	-0.206325	0.643611	-1.02119	-0.653352	2.32441	0.140758	-0.722334	-0.227909	-0.277669	AT3G28360.1	P-glycoprotein 16	---NA---
Storvum043027t1	0.46933	-0.428542	-0.0431158	-0.956929	2.17419	-0.426481	-0.917683	0.742487	-0.613257	AT3G56930.1	DHHC-type zinc finger family protein	PREDICTED: uncharacterized protein LOC104220461 isoform X1
Storvum043126t1	1.06923	-0.717818	1.03076	0.863939	1.14232	-0.812407	-0.495584	-0.759188	-1.32126	AT2G34780.2	maternal effect embryo arrest 22	---NA---
Storvum043185t1	-0.683013	0.98522	0.272961	-0.0897526	1.79101	0.586176	-1.19495	-1.06889	-0.598764	AT2G06570.1		---NA---
Storvum043318t1	-0.200421	0.185425	0.815504	0.534134	1.9515	-0.504513	-0.847341	-0.564953	-1.36933	AT5G60520.1	Late embryogenesis abundant (LEA) protein-related	beta-galactosidase 8
Storvum043429t1	1.10561	-1.74464	-0.49288	0.548791	0.427809	0.466077	1.09419	-0.152343	-1.25262	AT5G14930.2	senescence-associated gene 101	---NA---
Storvum043439t2	1.18324	0.0529557	-0.0178798	-0.0966259	1.66709	-1.34812	-1.41079	-0.0203279	-0.00954446	NA	NA	---NA---
Storvum043454t2	-0.702368	0.131993	0.603831	-0.461311	2.1918	0.022825	-1.23786	-0.735091	0.186173	AT4G12080.1	AT-hook motif nuclear-localized protein 1	AT-hook motif nuclear-localized protein 1-like
Storvum043584t1	-1.32146	1.0398	-0.0470485	0.128062	1.94099	-0.0324474	-1.04287	-0.136638	-0.528386	AT3G62010.2		PREDICTED: uncharacterized protein LOC107796346
Storvum043895t1	0.284631	1.38417	-0.26885	-0.80357	1.55258	-0.215026	-1.15447	-1.16166	0.382193	NA	NA	---NA---
Storvum044075t1	-0.309127	0.777959	-0.609457	0.185701	1.69769	-0.91043	-1.19868	1.09922	-0.732883	AT3G07330.1	Cellulose-synthase-like C6	---NA---
Storvum044355t1	0.124678	1.06478	0.868487	-1.21755	1.49458	-0.685835	0.268084	-0.950529	-0.966689	AT4G38430.1	rho guanyl-nucleotide exchange factor 1	rop guanine nucleotide exchange factor 1
Storvum044404t1	1.35231	0.10279	-0.320937	0.00255798	1.78662	-0.873865	-1.35298	-0.227978	-0.468522	ATCG00050.1	ribosomal protein S16	ribosomal protein S16 (chloroplast)
Storvum044753t1	-0.772442	0.49478	0.343365	-1.00707	2.2531	0.210788	-0.665644	-0.210088	-0.646782	AT1G25230.1	Calcineurin-like metallo-phosphoesterase superfamily protein	---NA---
Storvum045044t1	-0.0770178	0.433444	-0.511901	1.01849	2.05281	-0.808739	-0.87359	-0.377126	-0.856368	AT1G16010.3	magnesium transporter 2	---NA---
Storvum045049t1	-0.603542	-0.00735098	-0.00794617	-0.129476	2.49043	-0.0337881	-0.498896	-0.138246	-1.07119	NA	NA	---NA---
Storvum045220t1	-0.0673983	1.7617	-0.432204	0.199372	1.22705	-0.975442	0.158132	-0.470595	-1.40061	NA	NA	---NA---
Storvum045826t1	-1.14687	1.74209	-1.14275	0.421561	1.00065	0.000459913	-0.466564	0.4529	-0.861475	AT3G09880.1	Protein phosphatase 2A regulatory B subunit family protein	---NA---
Storvum046777t1	-0.30847	0.530671	-0.336735	-0.43542	2.42349	-0.507486	-1.02944	0.0227672	-0.359374	AT1G34430.1	2-oxoacid dehydrogenases acyltransferase family protein	---NA---
Storvum046879t1	0.0724225	0.0335742	-0.478668	0.333973	2.42581	-1.00093	-0.670141	-0.532794	-0.183243	AT1G06410.1	trehalose-phosphatase/synthase 7	---NA---
Storvum046889t1	-1.24849	-0.430502	-0.249979	0.474997	2.36223	-0.100453	-0.594926	-0.128991	-0.0838852	AT4G28000.1	P-loop containing nucleoside triphosphate hydrolases superfamily protein	---NA---
Storvum046971t1	1.44443	0.791367	-0.928061	-0.784536	1.40742	-0.0290338	0.00605202	-1.02214	-0.885491	NA	NA	---NA---
Storvum047197t1	-1.12177	0.501694	0.448526	-1.09937	2.15492	-0.176839	0.123672	-0.564992	-0.265843	AT5G44950.1	F-box/RNI-like/FBD-like domains-containing protein	---NA---
Storvum047350t1	-0.09037	0.252224	-0.781745	-0.442885	2.12536	-0.818677	-0.692116	-0.598722	1.04693	AT5G41220.1	glutathione S-transferase THETA 3	Glutathione S-transferase T1
Storvum047451t1	0.712144	-0.857822	1.28252	-0.920936	1.18	0.728528	-1.44255	-0.458083	-0.2238	AT1G01360.1	regulatory component of ABA receptor 1	abscisic acid receptor PYL9-like
Storvum047491t1	0.0394865	0.128167	0.342899	-0.136556	2.08347	-0.0221682	-1.62729	-0.918764	0.110758	AT1G66830.1	Leucine-rich repeat protein kinase family protein	---NA---
Storvum047719t1	0.886247	-0.40418	0.0585453	-0.980523	2.15277	-0.909944	-0.361861	0.22428	-0.665337	NA	NA	---NA---
Storvum047743t1	0.823553	0.253008	-0.20126	-0.874285	2.17322	-0.677626	-1.06446	-0.365015	-0.067135	ATMG01100.1		---NA---
Storvum047788t1	-0.0305069	0.459965	-0.147149	1.2613	1.5325	-1.18894	-0.139898	-0.215305	-1.53197	NA	NA	---NA---
Storvum048075t1	-0.627617	0.57216	0.613964	0.203495	1.88259	-0.00811153	-0.97906	-0.127254	-1.53017	AT1G47670.1	Transmembrane amino acid transporter family protein	lysine histidine transporter-like 8
Storvum048330t1	-0.00573809	-0.49471	-0.977604	0.00116286	1.96777	-1.39475	0.953417	-0.214293	0.16474	AT1G33600.1	Leucine-rich repeat (LRR) family protein	---NA---
Storvum048387t1	-0.33787	0.264336	1.0055	-0.060773	0.905867	-1.08815	-1.5275	1.44684	-0.608256	AT1G22660.2	Polynucleotide adenylyltransferase family protein	---NA---
Storvum048566t1	0.906837	-0.978155	-0.304257	-0.284873	0.786081	-0.787602	0.952978	1.24345	-1.53446	AT1G19720.1	Pentatricopeptide repeat (PPR-like) superfamily protein	---NA---
Storvum048630t1	0.413915	0.232334	-0.0261763	0.034712	1.50613	-2.29432	-0.30535	0.379044	0.059708	AT1G77690.1	like AUX1 3	---NA---
Storvum048712t1	0.396167	0.47924	0.0248738	0.70805	1.62749	-0.768283	-0.859035	0.155147	-1.76365	AT1G26260.3	cryptochrome-interacting basic-helix-loop-helix 5	60S ribosomal protein L38
Storvum048763t1	-0.163293	-0.172732	1.18552	0.241597	1.90511	-0.904972	-0.640844	-0.191932	-1.25846	AT1G33420.1	RING/FYVE/PHD zinc finger superfamily protein	---NA---
Storvum048833t1	0.816512	0.790868	0.537057	-0.143375	1.53816	-1.10539	-0.660669	-0.253138	-1.52003	AT3G25040.1	endoplasmic reticulum retention defective 2B	ER lumen protein-retaining receptor
Storvum048871t1	-0.289288	0.0621236	1.43017	0.240399	1.73407	-0.683805	-0.745132	-0.520171	-1.22837	AT1G47250.1	20S proteasome alpha subunit F2	---NA---
Storvum048996t1	0.779234	0.109619	0.355775	-0.530405	1.99828	0.0922981	-1.05624	-1.27853	-0.470035	AT1G74190.1	receptor like protein 15	---NA---
Storvum049348t1	0.24423	0.520884	-0.568874	-0.562795	2.43715	-0.529661	-0.568031	-0.407344	-0.565556	NA	NA	protein WVD2-like 1
Storvum050000t1	1.32863	-0.963142	0.375336	-1.04909	1.08276	-1.24498	0.187709	0.937656	-0.654875	AT2G12475.1	Defensin-like (DEFL) family protein	---NA---
Storvum050078t1	-0.72995	-0.0455881	0.548062	1.20678	1.86255	-1.00179	-0.416954	-0.554629	-0.868478	NA	NA	---NA---
Storvum050592t1	-0.648799	0.684175	-0.674774	1.24511	1.86615	-0.437953	-0.834617	-0.687042	-0.512254	AT2G31650.1	homologue of trithorax	histone-lysine N-methyltransferase ATX2-like
Storvum050607t1	-0.493559	0.235032	-0.519445	0.0166276	2.25985	-0.817501	-1.03088	0.690638	-0.340766	NA	NA	---NA---
Storvum050952t1	0.476121	0.727696	-1.37323	0.147762	1.69972	-1.17983	-0.95133	0.0725182	0.380578	AT1G22120.1		---NA---
Storvum051179t1	-0.0368433	-0.697966	0.236626	-0.595938	2.5154	-0.524309	-0.517095	0.0917291	-0.471604	AT3G27770.1		---NA---
Storvum051456t1	0.578796	0.449714	-0.774704	1.16499	1.56237	-1.16451	-0.813257	0.0196024	-1.023	AT2G15620.1	nitrite reductase 1	---NA---
Storvum051749t1	1.19782	0.342778	0.718079	-0.10987	1.37125	-1.42926	-0.977426	-1.01591	-0.0974632	AT2G25440.1	receptor like protein 20	receptor-like protein 12
Storvum051779t1	0.118958	1.93486	0.049604	-0.0281815	1.22021	-0.860712	-0.84036	-0.923618	-0.670757	AT5G43100.1	Eukaryotic aspartyl protease family protein	aspartic proteinase-like protein 2 isoform X1
Storvum052007t1	1.33123	0.199307	-1.54444	-0.425412	1.10865	-1.38973	0.677915	6.14e-05	0.0424149	AT4G09500.1	UDP-Glycosyltransferase superfamily protein	---NA---
Storvum052152t1	0.509059	-0.226968	0.675447	-0.783793	1.47782	-1.12591	-1.06587	1.24097	-0.700754	AT5G62790.1	1-deoxy-D-xylulose 5-phosphate reductoisomerase	---NA---
Storvum052159t1	0.96367	-1.08944	0.614803	1.17736	1.29548	-0.751832	-0.796077	-1.05583	-0.358135	NA	NA	---NA---
Storvum052162t1	1.84148	-1.06003	-0.969295	-0.160475	1.26867	-0.406331	-0.800426	-0.0352281	0.321636	ATCG01270.1	Protein precursor Ycf15, putative, chloroplast	---NA---
Storvum052263t1	-0.422381	-0.615941	0.0281008	-0.937054	2.17381	0.711904	0.204347	-0.00733221	-1.13546	NA	NA	---NA---
Storvum052300t1	-0.59558	1.13541	-1.02464	1.07862	0.920046	-0.851694	-0.246524	0.89305	-1.30869	AT3G61610.1	Galactose mutarotase-like superfamily protein	putative glucose-6-phosphate 1-epimerase
Storvum052399t1	0.904245	-0.164378	-1.09875	0.232356	1.60565	-0.250992	-1.56356	0.780903	-0.445475	AT2G04840.1	Protein of unknown function (DUF295)	---NA---
Storvum052455t1	-0.427718	1.14917	-0.869392	0.437908	1.3889	-0.44091	-1.299	-0.901189	0.962228	AT4G01740.1	Cysteine/Histidine-rich C1 domain family protein	---NA---
Storvum052558t1	0.341791	0.181506	-0.450496	-0.811427	2.22076	-1.37767	0.255413	-0.0592176	-0.300659	NA	NA	---NA---
Storvum052570t1	1.44703	-0.577681	0.776094	-0.18213	1.53066	-0.48536	-0.591481	-1.25087	-0.666261	AT2G06541.2	TTF-type zinc finger protein with HAT dimerisation domain	---NA---
Storvum052574t1	0.561858	0.202592	-0.156613	0.0209349	1.85673	-1.00785	-0.267723	-1.68928	0.479344	AT5G50870.1	ubiquitin-conjugating enzyme 27	---NA---
Storvum053078t1	-0.0140819	0.945857	0.0995745	-0.274424	2.17591	-0.999228	-0.480509	-0.715879	-0.737224	AT3G47910.1	Ubiquitin carboxyl-terminal hydrolase-related protein	---NA---
Storvum053087t1	-0.271001	0.070452	-0.358584	-0.208605	2.32705	-0.565773	-1.29647	0.530617	-0.227693	AT5G47400.1		---NA---
Storvum053155t1	-1.15314	0.016101	1.63548	-0.796049	1.58125	-0.329226	-0.613686	0.22845	-0.569188	AT5G40060.1	Disease resistance protein (NBS-LRR class) family	---NA---
Storvum053213t1	1.06735	-0.582812	0.0740328	0.141989	1.49875	-0.160044	0.684785	-1.5111	-1.21295	AT5G09310.1		---NA---
Storvum053326t1	0.752672	-0.258752	0.834068	0.0836373	1.72755	-1.34357	-0.927594	0.13041	-0.998422	ATCG01120.1	chloroplast ribosomal protein S15	---NA---
Storvum053362t1	-1.26051	0.312859	0.46292	0.0248587	2.06137	-0.198086	-1.31218	0.159144	-0.250375	AT3G16060.1	ATP binding microtubule motor family protein	kinesin-like protein KIN-13B isoform X2
Storvum053387t1	-0.0369276	0.320544	0.27524	1.20175	1.44858	-1.32239	-1.57484	-0.151296	-0.160659	NA	NA	---NA---
Storvum053391t1	0.436766	-0.265808	0.873	-1.10448	1.76389	-1.42483	-0.719449	0.233237	0.207681	AT3G42670.1	chromatin remodeling 38	---NA---
Storvum053396t1	1.20751	-0.464789	0.641865	-0.273136	1.27882	-1.13089	0.457202	-0.0700567	-1.64653	AT1G67750.1	Pectate lyase family protein	probable pectate lyase 8
Storvum053437t1	0.473481	0.449438	0.583954	-0.413952	2.11246	-0.949874	-0.742189	-0.736936	-0.776386	NA	NA	---NA---
Storvum053459t1	-0.443374	0.418586	1.6061	-1.65973	1.32815	-0.0759565	-0.358495	-0.22969	-0.585587	AT5G56000.1	HEAT SHOCK PROTEIN 81.4	---NA---
Storvum053472t1	0.142984	0.0934835	-0.978509	0.605069	2.3092	-0.329278	-0.717474	-0.733418	-0.392062	AT1G54980.1	Plant invertase/pectin methylesterase inhibitor superfamily protein	hypothetical protein SDM1_44t00011
Storvum053556t1	0.888045	0.621318	0.520515	-1.79949	1.43548	-0.443015	-0.00542557	-1.00763	-0.209799	AT1G29470.2	S-adenosyl-L-methionine-dependent methyltransferases superfamily protein	---NA---
Storvum054244t2	-0.700331	1.91684	-0.397043	0.31931	1.32363	-0.304819	-0.406891	-0.747416	-1.00328	AT2G24590.1	RNA recognition motif and CCHC-type zinc finger domains containing protein	---NA---
Storvum054269t1	-1.19289	0.697209	1.56827	-0.151384	0.969464	-0.695836	-0.447967	0.549844	-1.29671	NA	NA	---NA---
Storvum054271t1	0.894786	-0.832323	-0.985929	0.178875	1.87135	0.660281	-0.839764	-0.0204516	-0.926824	NA	NA	---NA---
Storvum054329t1	1.20613	-0.0506828	-0.243355	0.529598	1.82185	-0.709163	-0.723313	-0.614406	-1.21666	ATCG00510.1	photsystem I subunit I	photosystem I subunit VIII (chloroplast)
Storvum054345t1	-0.548793	-0.3084	-0.174565	-0.674202	2.25545	0.60694	0.446329	-1.10107	-0.501688	AT3G47890.1	Ubiquitin carboxyl-terminal hydrolase-related protein	---NA---
Storvum054378t1	-1.04751	-0.364873	-0.0141437	0.294047	2.23262	0.202839	0.306812	-1.17049	-0.439301	AT3G57610.1	adenylosuccinate synthase	adenylosuccinate synthetase, chloroplastic
Storvum054383t1	0.0813471	-1.59941	-0.217589	1.12492	1.58925	0.154179	-0.369025	0.37487	-1.13854	AT3G27630.1		---NA---
Storvum054390t1	-0.588604	-0.862015	0.127941	0.111098	2.34404	-0.159741	-1.07248	0.371232	-0.271476	AT5G15890.1	TRICHOME BIREFRINGENCE-LIKE 21	---NA---
Storvum054400t1	-0.183177	0.56154	0.446029	1.53261	0.873553	-0.35902	-0.354279	-0.581314	-1.93594	AT4G26980.1	RNI-like superfamily protein	hypothetical protein BC332_20016
Storvum054740t1	-0.286074	0.388097	0.218882	0.713171	1.39145	-1.38559	0.665636	0.000875479	-1.70644	AT3G55100.1	ABC-2 type transporter family protein	---NA---
Storvum055053t1	-0.456523	0.877159	0.605622	-0.0276475	1.95749	-1.12675	-1.04917	-0.662303	-0.117883	AT5G26622.2	Beta-galactosidase related protein	---NA---
Storvum055330t1	0.950938	1.17188	-1.38735	-0.486596	1.54961	-0.370489	-0.0239391	-0.567723	-0.836332	AT3G13670.1	Protein kinase family protein	F-box/FBD/LRR-repeat protein At1g13570-like
Storvum055765t1	-0.182925	-0.33971	-0.990415	0.00317091	2.28952	-0.974463	-0.539492	0.61013	0.124187	NA	NA	---NA---
Storvum055938t1	0.307692	0.0918952	-0.024369	-0.661788	2.10495	-0.647457	-1.53103	0.49582	-0.135707	AT1G77940.1	Ribosomal protein L7Ae/L30e/S12e/Gadd45 family protein	60S ribosomal protein L30
Storvum055951t1	0.216113	-0.0895199	-0.610043	0.833471	2.01986	-1.26747	0.135783	-1.07029	-0.167905	AT3G01750.1	Ankyrin repeat family protein	---NA---
Storvum056058t2	0.195852	-0.455291	-0.484922	-0.227028	2.07099	1.04829	-1.07361	-0.118771	-0.955515	AT1G70260.1	nodulin MtN21 /EamA-like transporter family protein	WAT1-related protein At5g40240-like
Storvum056115t1	0.440959	0.98086	0.232581	0.1482	1.49593	-1.73999	-0.726862	0.144448	-0.976126	NA	NA	---NA---
Storvum056156t1	1.64207	-0.093883	-0.732375	-0.285269	1.13754	0.0263248	0.678793	-0.956844	-1.41635	NA	NA	receptor-like serine/threonine-protein kinase ALE2
Storvum056204t1	-0.163962	0.0795187	0.370867	-0.875471	2.44917	-0.298085	-0.58761	-0.766007	-0.208425	AT3G03220.1	expansin A13	expansin-A13-like
Storvum057313t1	-0.802941	-0.447244	0.756564	0.707353	1.98027	-0.168163	-1.37399	-0.198451	-0.453399	AT2G20700.1	LORELEI-LIKE-GPI ANCHORED PROTEIN 2	---NA---
Storvum057357t1	1.32418	-0.359591	-1.13753	-0.297052	1.92641	-0.952652	-0.220511	-0.25926	-0.0239991	AT5G64290.1	dicarboxylate transport 2.1	---NA---
Storvum057688t1	0.431807	0.343519	-0.189975	0.0498475	2.06958	-1.49653	-0.975559	0.162436	-0.395122	AT1G35170.1	TRAM, LAG1 and CLN8 (TLC) lipid-sensing domain containing protein	---NA---
Storvum057830t1	0.500494	-0.271406	0.319264	-0.911453	2.09791	0.302588	-1.13162	-0.981843	0.0760661	AT1G21990.1	F-box/RNI-like/FBD-like domains-containing protein	---NA---
Storvum057921t1	-0.886827	0.401702	1.1338	-0.0391752	1.95736	-0.826254	-0.182988	-0.826838	-0.730779	AT1G67890.2	PAS domain-containing protein tyrosine kinase family protein	---NA---
Storvum058103t1	-0.0326483	0.0328426	1.54006	-0.433508	1.22284	-0.975196	-1.22391	-0.927012	0.796529	AT2G44740.1	cyclin p4;1	---NA---
Storvum058107t1	-0.274499	1.8212	-1.2776	-0.168936	0.883385	-0.316478	0.0161156	0.615731	-1.29892	AT4G35270.1	Plant regulator RWP-RK family protein	protein NLP5-like
Storvum058133t1	1.00987	-0.338723	-0.524436	-0.330178	1.58831	-0.685936	-0.767092	1.22795	-1.17977	NA	NA	---NA---
Storvum058169t1	-0.600761	0.663839	0.335866	-0.573721	1.90087	0.0132805	-0.684623	-1.55645	0.501696	AT3G49650.1	P-loop containing nucleoside triphosphate hydrolases superfamily protein	---NA---
Storvum058365t1	1.15397	-0.228853	-0.53588	0.811002	1.38539	-1.4028	0.461502	-0.491244	-1.15309	AT5G15200.2	Ribosomal protein S4	---NA---
Storvum058416t1	0.54729	-0.965513	1.71252	-0.393215	1.26306	-1.17948	0.0820042	-0.289627	-0.777045	AT2G29960.1	cyclophilin 5	---NA---
Storvum058979t1	1.02211	-0.325527	1.32599	-0.176877	1.11131	0.0768204	-0.920871	-0.448784	-1.66417	AT3G56120.1	S-adenosyl-L-methionine-dependent methyltransferases superfamily protein	---NA---
Storvum059184t1	-0.572231	-0.00935043	1.44979	0.00318208	1.69727	-0.465213	-1.20791	-1.00156	0.106036	AT1G67290.1	glyoxal oxidase-related protein	---NA---
Storvum059189t1	-0.590577	-0.580684	-0.661182	-0.00229586	2.43055	0.281743	-0.59332	0.35661	-0.640848	AT5G15640.1	Mitochondrial substrate carrier family protein	---NA---
Storvum059271t1	0.909136	-0.84747	1.05709	0.627938	1.30149	-0.794398	-0.121449	-1.47261	-0.659728	AT2G25660.1	embryo defective 2410	---NA---
Storvum059420t1	0.659657	0.0772271	0.285075	0.226908	1.60245	0.656571	-1.33017	-1.46743	-0.710297	AT1G50740.1	Transmembrane proteins 14C	protein FATTY ACID EXPORT 5-like
Storvum059480t1	-0.856277	0.748286	0.307141	-0.499559	2.17869	-1.14535	-0.430416	0.0403394	-0.342856	AT1G12050.1	fumarylacetoacetase, putative	---NA---
Storvum059490t1	0.193662	0.631584	-1.06841	-0.0170524	1.80746	-0.839087	-1.35915	0.768004	-0.117008	NA	NA	THO complex subunit 2-like
Storvum059492t2	1.02127	-0.603215	-0.559906	-0.73364	2.13561	-0.0138852	-1.07733	-0.13683	-0.0320705	NA	NA	---NA---
Storvum059548t1	1.11069	0.130912	-0.0962647	0.127429	1.07974	-0.718617	1.05678	-1.73575	-0.954916	AT5G11800.1	K+ efflux antiporter 6	K(+) efflux antiporter 6-like isoform X2
Storvum060055t1	-0.0245814	0.713369	0.584783	-0.661464	2.0543	-1.13389	-0.606776	-0.010936	-0.914805	AT5G25430.1	HCO3- transporter family	---NA---
Storvum060105t1	0.191413	0.162589	-0.49773	-0.427234	2.5541	-0.49904	-0.493597	-0.49547	-0.495034	AT2G17010.1	Mechanosensitive ion channel family protein	---NA---
Storvum060120t1	-0.738297	0.225452	0.0606721	0.119675	2.21629	-1.39206	-0.705493	0.195604	0.0181635	AT4G29430.1	ribosomal protein S15A E	40S ribosomal protein S15a-2-like
Storvum060172t1	0.738949	0.558384	-0.100235	0.332517	1.94363	-1.26635	-0.840141	-0.670226	-0.69653	AT5G15800.2	K-box region and MADS-box transcription factor family protein	---NA---
Storvum060209t1	0.492016	-1.17884	0.868068	-0.790216	2.02796	0.146504	-0.387651	-0.667196	-0.51065	AT2G37020.2	Translin family protein	PREDICTED: uncharacterized protein At1g04910-like isoform X1
Storvum060507t1	-0.415862	-0.68027	-0.219504	-0.275913	2.16044	0.999557	-0.0938324	-0.24878	-1.22583	AT2G47490.1	NAD+ transporter 1	Nicotinamide adenine dinucleotide transporter 2, mitochondrial
Storvum060666t1	0.841081	-0.326664	0.821617	-0.00147776	1.49558	-0.737217	0.509719	-1.09653	-1.50611	AT1G32940.1	Subtilase family protein	---NA---
Storvum060762t1	-0.275453	-0.225824	0.196438	0.743807	2.19714	-1.36025	-0.528094	-0.22363	-0.524133	AT5G65940.3	beta-hydroxyisobutyryl-CoA hydrolase 1	---NA---
Storvum061257t1	0.202835	-0.57171	-0.344529	-0.0950392	2.56175	-0.565335	-0.402122	-0.117584	-0.668266	NA	NA	---NA---
Storvum061299t1	0.904736	0.422235	-1.19439	0.455302	1.70313	-0.969888	0.251936	-0.449438	-1.12361	AT3G26085.1	CAAX amino terminal protease family protein	---NA---
Storvum061453t1	-0.499106	-1.03688	0.308081	-0.404785	2.39581	-0.31268	0.297799	-0.0495118	-0.698719	AT3G60250.1	casein kinase II beta chain 3	---NA---
Storvum061480t1	-0.697796	0.128992	0.920495	0.991212	1.07618	-1.38922	0.125261	0.396013	-1.55113	AT4G35380.1	SEC7-like guanine nucleotide exchange family protein	---NA---
Storvum061578t1	-0.449406	-0.232301	-0.126068	1.63825	1.13258	-1.36359	0.879196	-0.605222	-0.873446	NA	NA	---NA---
Storvum061720t1	-0.849309	0.430714	-0.572809	-0.0268865	2.26874	-0.280437	-0.632738	0.56663	-0.903909	AT1G61580.1	R-protein L3 B	60S ribosomal protein L3-2
Storvum061809t1	0.482542	-0.0204891	0.183999	0.233402	1.9049	-1.19005	-0.414039	-1.5297	0.349439	NA	NA	Calpain-type cysteine protease DEK1
Storvum061856t1	0.524544	-0.682985	-0.54068	0.330227	2.1562	-1.30556	-0.572911	-0.246778	0.337944	ATMG00810.1	DNA/RNA polymerases superfamily protein	uncharacterized mitochondrial protein AtMg00810-like
Storvum062579t1	0.620281	0.149221	-0.590423	0.856277	2.01985	-0.978339	-0.804342	-0.542419	-0.730105	NA	NA	---NA---
Storvum062718t1	-0.0941465	0.586495	0.906052	-0.221247	1.81269	-0.70929	-1.38777	0.12976	-1.02254	AT3G29250.2	NAD(P)-binding Rossmann-fold superfamily protein	short-chain dehydrogenase reductase 3b-like
Storvum062774t1	-0.610474	-0.630874	1.09101	-0.121512	2.06489	0.190213	-1.16843	-0.523861	-0.290953	AT4G00026.1		probable mitochondrial import inner membrane translocase subunit TIM21
Storvum062865t1	-0.279095	0.0290169	1.4654	0.766525	1.11482	-1.51702	-0.108011	-0.212551	-1.25908	AT2G30240.1	Cation/hydrogen exchanger family protein	---NA---
Storvum062987t1	1.0524	0.78614	-0.681188	0.541974	0.917582	0.508419	-0.406272	-0.83297	-1.88609	AT1G31690.1	Copper amine oxidase family protein	---NA---
Storvum063413t1	0.0903314	-0.785031	-0.585797	1.1945	2.09649	-0.416927	-0.432341	-0.876699	-0.284528	NA	NA	---NA---
Storvum063933t1	-0.71139	-0.247556	-0.0966551	-0.25557	2.57464	-0.0215629	-0.0378856	-0.637047	-0.566977	AT1G27970.1	nuclear transport factor 2B	---NA---
Storvum064320t1	-0.123144	-0.296103	0.613325	-1.1972	2.07478	-1.16149	0.139576	-0.479406	0.429669	AT3G53360.1	Tetratricopeptide repeat (TPR)-like superfamily protein	---NA---
Storvum064433t1	0.275635	-0.491533	-0.412366	-0.263847	2.23088	-0.183059	0.254213	-1.53377	0.123849	AT3G44920.1	cation/H+ exchanger 11	---NA---
Storvum064464t1	0.899622	-0.835555	-1.30657	0.205197	1.81095	-0.974215	-0.17466	0.642462	-0.267228	AT3G60300.2	RWD domain-containing protein	PREDICTED: uncharacterized protein LOC109241851
Storvum064474t1	-0.0262554	1.46753	0.329326	-0.08591	1.61808	-1.26906	-0.549159	-0.521338	-0.963216	NA	NA	---NA---
Storvum064500t1	1.39586	0.699328	-0.882388	-0.533052	1.27438	-0.1525	0.215716	-1.6296	-0.387748	AT4G14530.1		---NA---
Storvum064536t1	0.122047	0.37764	1.04762	-0.323765	1.45253	-1.42342	-0.0171059	0.315126	-1.55067	AT4G28760.2	Protein of unknown function (DUF3741)	---NA---
Storvum064780t1	0.199812	-0.249531	-0.415066	0.202957	2.31217	0.322428	-1.20439	-0.359338	-0.809046	AT3G18110.1	Pentatricopeptide repeat (PPR) superfamily protein	---NA---
Storvum064961t1	0.480221	-1.18441	0.76999	0.120299	1.93224	-0.58453	-1.05336	0.23884	-0.719295	AT2G06510.2	replication protein A 1A	---NA---
Storvum065208t1	-0.994591	0.670927	0.646002	0.81809	1.14261	-0.867952	-0.680892	0.790929	-1.52512	AT5G04950.1	nicotianamine synthase 1	---NA---
Storvum065230t1	0.00639125	-0.577679	0.54784	-0.718633	2.3852	-0.85318	-0.123431	-0.645679	-0.0208341	NA	NA	---NA---
Storvum065287t1	-0.344949	0.0554971	-0.180836	-0.0954441	2.58763	-0.318179	-0.636867	-0.712851	-0.353997	NA	NA	---NA---
Storvum065549t1	-0.301537	-0.299342	0.0621154	-0.308965	2.50017	-0.886898	0.0381449	0.0214096	-0.8251	AT5G39220.1	alpha/beta-Hydrolases superfamily protein	---NA---
Storvum065670t1	-0.345165	0.376809	-0.107016	0.284105	2.06859	-0.772025	-0.992592	0.653296	-1.16601	AT3G09690.2	alpha/beta-Hydrolases superfamily protein	---NA---
Storvum065688t1	1.08219	0.721034	-1.14507	-0.582855	0.991124	-0.439644	1.15967	-1.41377	-0.372682	NA	NA	---NA---
Storvum065851t1	-0.300576	1.21609	0.0324372	-1.66429	1.43702	0.0217333	0.383626	-1.20068	0.0746452	AT3G03050.1	cellulose synthase-like D3	---NA---
Storvum065908t1	0.594275	-0.420949	0.803812	0.214834	1.90398	-0.440034	-0.273966	-1.34383	-1.03812	NA	NA	---NA---
Storvum065925t1	0.147909	0.533347	0.726631	-0.948066	2.10005	-0.907025	-0.819064	-0.328928	-0.504855	AT5G26880.1	AGAMOUS-like 26	---NA---
Storvum066377t1	-0.279236	0.857758	-0.639241	-0.888049	2.13692	0.535269	-0.836107	-0.590823	-0.296496	AT2G42250.1	cytochrome P450, family 712, subfamily A, polypeptide 1	---NA---
Storvum066765t1	0.14299	0.0201491	-0.73093	0.559595	2.35879	-0.602865	-0.878888	-0.269302	-0.599537	AT1G31840.1	Tetratricopeptide repeat (TPR)-like superfamily protein	---NA---
Storvum066793t1	-1.25672	0.453194	0.384821	0.437441	2.09742	-0.906275	-0.112735	-0.691364	-0.405783	AT1G11890.1	Synaptobrevin family protein	---NA---
Storvum066826t1	-0.51172	1.11619	-1.04532	-0.304709	0.721501	-1.04827	0.621259	1.49036	-1.03931	AT5G64250.1	Aldolase-type TIM barrel family protein	---NA---
Storvum066870t1	-0.975994	0.155575	0.343625	0.19351	2.2217	-0.298789	-0.984458	0.246303	-0.901473	ATCG01280.1	Chloroplast Ycf2;ATPase, AAA type, core	---NA---
Storvum066895t1	-0.0380134	-0.250658	-0.601492	-0.00897112	2.45625	-0.701319	-0.865782	-0.381796	0.391781	AT2G45460.3	SMAD/FHA domain-containing protein	---NA---
Storvum067042t1	0.182676	0.395076	-0.565269	0.225881	2.31364	-0.780297	-1.0767	-0.54425	-0.150752	AT1G33600.1	Leucine-rich repeat (LRR) family protein	---NA---
Storvum067078t1	-0.692434	1.49635	0.549207	-0.164109	1.1166	-0.94085	-1.26397	0.730059	-0.830856	AT3G16950.2	lipoamide dehydrogenase 1	---NA---
Storvum067190t1	1.0426	0.117763	1.08974	0.101642	1.38249	-0.958301	-0.92476	-0.536352	-1.31483	AT2G31005.1		---NA---
Storvum067321t1	0.606126	-0.119418	-0.624353	-0.708209	2.28147	-0.0717939	0.149535	-1.17453	-0.338826	NA	NA	---NA---
Storvum067324t1	0.484706	-0.150122	-0.381567	0.664082	1.98004	-1.01609	-1.42702	0.201057	-0.355085	AT5G17500.1	Glycosyl hydrolase superfamily protein	---NA---
Storvum067616t1	1.66876	-0.270176	-1.36968	-0.408197	1.60921	-0.157296	-0.424124	-0.542317	-0.106187	NA	NA	---NA---
Storvum067631t1	0.520111	-0.0449406	-1.18851	0.242934	2.24791	-0.620228	-0.29465	-0.00751856	-0.855107	AT4G02570.4	cullin 1	---NA---
Storvum068123t1	0.574737	-0.601562	0.44763	0.6199	1.55595	-1.51593	-1.01521	0.664136	-0.729654	AT3G17580.1		---NA---
Storvum068281t1	-0.898282	0.0298414	-0.467543	1.65711	0.909423	-0.672773	-0.632462	1.16542	-1.09073	NA	NA	---NA---
Storvum068348t1	0.106352	1.49325	-0.880175	0.859897	1.29098	-1.10321	-1.04623	-0.417996	-0.302875	AT5G53680.1	RNA-binding (RRM/RBD/RNP motifs) family protein	---NA---
Storvum068853t1	0.0518448	-1.81296	0.344788	-0.0837146	1.6262	0.721689	0.510328	-0.335223	-1.02295	AT5G38910.1	RmlC-like cupins superfamily protein	---NA---
Storvum069007t1	1.38942	-0.0114237	0.670597	-1.4753	1.06419	-1.08989	0.150404	0.305445	-1.00345	AT2G15480.2	UDP-glucosyl transferase 73B5	---NA---
Storvum069442t1	1.74501	-0.63702	-0.3439	-0.299395	1.57479	0.0295683	-0.276894	-0.597945	-1.19422	AT5G27110.1	Tetratricopeptide repeat (TPR)-like superfamily protein	---NA---
Storvum070742t1	1.10365	0.626065	-0.143683	0.658467	1.45298	-0.968563	-0.464321	-0.901312	-1.36329	AT3G04730.1	indoleacetic acid-induced protein 16	---NA---
Storvum071378t1	0.647081	0.618394	1.52073	-0.391857	0.722804	-1.44596	-0.798073	-1.17864	0.305531	AT5G28960.1		---NA---
Storvum071664t1	0.407185	0.223164	-0.100629	-1.13242	2.21916	-0.475696	-0.911392	-0.606614	0.377241	AT3G25130.1		---NA---
Storvum072515t1	0.605761	-0.207694	0.0403789	0.474978	1.69504	0.713229	-0.907665	-0.85828	-1.55574	AT2G44590.1	DYNAMIN-like 1D	---NA---
Storvum072561t1	0.781949	1.00505	-0.0750476	-0.279894	1.622	-0.177268	-1.5827	-0.266357	-1.02774	NA	NA	---NA---
Storvum072670t1	0.836384	-0.191531	-0.582681	0.674213	1.92699	-0.922202	0.187896	-0.893753	-1.03531	AT4G34020.1	Class I glutamine amidotransferase-like superfamily protein	protein DJ-1 homolog C
Storvum072806t1	-0.905683	1.18733	-0.0264478	-0.0953967	1.93835	0.0666994	-1.2237	-0.64118	-0.299971	AT2G28350.1	auxin response factor 10	---NA---
Storvum072902t1	-0.544683	-0.0463794	-0.213834	0.205985	2.34763	-0.89443	-0.0653717	-1.09666	0.307736	AT1G73030.1	SNF7 family protein	---NA---
Storvum073177t1	0.0515742	0.181178	0.633599	-0.257231	1.02438	1.25399	-1.59537	0.218548	-1.51066	AT1G77880.1	Galactose oxidase/kelch repeat superfamily protein	---NA---
Storvum073672t1	0.0129829	0.944067	-0.578207	-1.5604	2.00961	-0.0888337	-0.151546	-0.514431	-0.0732481	AT3G16920.1	chitinase-like protein 2	---NA---
Storvum074738t1	0.668227	-0.667529	1.78574	-0.550158	1.17538	-1.20108	-0.767166	-0.451257	0.00785221	AT1G02145.2	homolog of asparagine-linked glycosylation 12	---NA---
Storvum075467t1	-0.24625	-0.0654095	0.883111	0.810087	1.88962	-0.972091	-0.640717	-0.514725	-1.14362	AT1G21750.2	PDI-like 1-1	---NA---
Storvum075996t1	-0.650571	0.787336	0.553453	-1.01062	1.80209	-0.916713	-1.04937	0.643954	-0.159564	AT1G04620.1	coenzyme F420 hydrogenase family / dehydrogenase, beta subunit family	---NA---
Storvum077193t1	1.77925	-1.42914	0.477382	-0.710395	0.875314	-0.923286	0.164865	-0.556376	0.322386	AT5G45540.1	Protein of unknown function (DUF594)	---NA---
Storvum077680t1	-0.209288	-1.09521	0.184107	1.98265	1.12854	-0.286352	-0.0328628	-0.697721	-0.973868	AT1G78070.1	Transducin/WD40 repeat-like superfamily protein	---NA---
Storvum077925t1	1.45169	0.481478	-0.64735	-0.00870609	1.65678	-0.297142	-0.717615	-0.798397	-1.12073	AT3G48310.1	cytochrome P450, family 71, subfamily A, polypeptide 22	---NA---
Storvum079005t1	0.818872	0.829565	0.45421	-0.984685	1.74732	-0.510107	-0.384971	-1.16254	-0.807659	NA	NA	---NA---
Storvum079569t1	0.759477	-0.652599	-0.388695	0.762135	1.80862	-1.36486	-0.959715	0.341652	-0.306015	AT1G33410.1	SUPPRESSOR OF AUXIN RESISTANCE1	---NA---
Storvum080984t1	0.0272759	0.464346	-0.505371	0.439408	2.16103	-1.18157	-0.413386	0.0547564	-1.04648	AT4G32370.1	Pectin lyase-like superfamily protein	---NA---
Storvum081237t1	-0.0904689	0.34014	0.745178	1.19143	1.49841	-1.20913	-0.517027	-0.912686	-1.04584	AT1G30690.2	Sec14p-like phosphatidylinositol transfer family protein	patellin-4
Storvum081342t1	0.276711	-0.268091	0.457395	-0.511651	2.04649	0.169436	-1.68518	0.0785607	-0.563669	NA	NA	---NA---
Storvum081377t1	-0.664503	-1.17007	-0.429809	0.470875	1.97814	-1.1885	0.618145	0.172396	0.21333	AT1G80470.1	F-box/RNI-like/FBD-like domains-containing protein	---NA---
Storvum081880t1	0.546952	0.672956	0.103068	-1.71212	1.84988	-0.264626	-0.717963	0.0643614	-0.542499	AT1G06590.1		---NA---
Storvum082052t1	1.0979	-0.208901	0.288614	-0.467453	2.03183	-1.05844	-0.701727	-0.154666	-0.82716	AT2G36380.1	pleiotropic drug resistance 6	---NA---
Storvum082904t1	-0.571813	-0.883766	0.37947	1.98451	1.21407	-0.533856	-0.315198	-0.901838	-0.371581	AT2G24630.1	Glycosyl transferase family 2 protein	---NA---
Storvum083085t1	0.0347694	1.59595	1.09184	-0.292838	0.879614	-0.485099	-1.4274	-0.422937	-0.973892	AT3G47740.1	ABC2 homolog 2	---NA---
Storvum083211t1	0.450495	1.06395	-0.653581	-1.105	1.85358	-0.0771432	-1.12264	-0.544636	0.134983	AT1G03590.1	Protein phosphatase 2C family protein	---NA---
Storvum083977t1	-0.126908	-0.668779	-0.730318	-0.121759	2.39407	-0.559541	-0.418648	0.724881	-0.493002	AT3G53000.1	phloem protein 2-A15	---NA---
Storvum084149t1	0.389394	-0.647841	-0.205521	-0.497687	1.9666	0.155248	-1.18597	0.972125	-0.946351	AT2G35800.1	mitochondrial substrate carrier family protein	---NA---
Storvum086484t1	-0.168606	1.29339	-1.48065	-0.196508	1.59881	-0.924368	-0.459047	0.609875	-0.272899	AT2G20680.1	Glycosyl hydrolase superfamily protein	---NA---
Storvum086581t1	0.0205085	0.252992	1.02709	0.12124	1.72617	-1.66917	-0.693297	0.00154109	-0.787078	AT3G01380.1	transferases;sulfuric ester hydrolases;catalytics;transferases	---NA---
Storvum089365t1	-0.0358636	-0.603193	0.581866	-0.385491	2.37138	-0.100271	-0.2566	-1.1123	-0.459518	AT5G02110.1	CYCLIN D7;1	---NA---
Storvum093710t1	-0.323915	-0.239861	0.156029	-0.202636	2.44953	-0.610832	-0.179166	0.114319	-1.16347	AT2G23780.1	RING/U-box superfamily protein	---NA---
Storvum094259t1	-0.495111	-0.106946	-0.138958	-0.00933976	2.31339	-0.905252	0.554115	-0.10028	-1.11162	AT3G10380.1	subunit of exocyst complex 8	---NA---
Storvum095305t1	0.897295	-1.06414	0.0476159	0.363495	2.04304	-0.838109	-0.0182414	-0.598302	-0.832661	AT1G51870.1	protein kinase family protein	---NA---
Storvum096080t1	0.248887	0.339201	0.118347	-0.414478	2.12912	-1.63374	-0.605397	0.0700649	-0.252009	AT1G64060.1	respiratory burst oxidase protein F	---NA---
Storvum096926t1	0.23978	0.663352	-0.196146	1.12669	1.69397	-1.02171	-0.517268	-0.859824	-1.12884	AT1G74770.1	zinc ion binding	---NA---
Storvum100387t1	0.546033	0.028633	0.0124065	0.294643	1.9769	0.127665	-0.927608	-0.43347	-1.6252	AT5G05690.1	Cytochrome P450 superfamily protein	---NA---
Storvum100628t1	0.559093	0.221646	0.552475	1.38712	1.09744	-0.978146	-0.552365	-1.54793	-0.739335	AT2G29080.1	FTSH protease 3	---NA---
Storvum101455t1	0.42178	1.39053	-0.138838	-0.656108	1.62075	-1.46105	-0.759677	-0.127949	-0.289436	AT4G14940.1	amine oxidase 1	---NA---
Storvum103667t1	1.3867	-0.753445	-0.558298	-0.216397	1.9559	-0.788685	-0.638367	-0.525921	0.138514	NA	NA	---NA---
Storvum103725t1	0.319783	0.953142	-0.626527	-0.333693	1.85987	0.515162	-0.458554	-0.932955	-1.29623	AT5G35830.1	Ankyrin repeat family protein	ankyrin repeat-containing protein NPR4-like
Storvum104014t1	-0.697335	1.71164	-0.0510742	-0.307289	1.11963	0.26792	-1.68019	0.187541	-0.550838	AT1G52640.1	Pentatricopeptide repeat (PPR) superfamily protein	---NA---
Storvum108491t1	-0.14991	0.63023	0.0400556	0.953493	1.70329	-1.64813	-0.680829	-0.0858588	-0.762334	NA	NA	---NA---
Storvum109174t1	-1.04294	-0.376874	1.02472	-0.0102753	2.13884	-0.165128	-0.967038	-0.334381	-0.266921	AT3G21350.2	RNA polymerase transcriptional regulation mediator-related	---NA---
Storvum109334t1	-0.426034	0.680795	-0.148905	-0.531961	2.39349	-0.984527	-0.19966	-0.340599	-0.4426	AT1G54940.1	plant glycogenin-like starch initiation protein 4	---NA---
Storvum110419t1	0.714806	-0.550796	1.53244	0.23409	1.23208	-0.0871221	-0.77605	-1.22352	-1.07593	AT1G12910.1	Transducin/WD40 repeat-like superfamily protein	---NA---
Storvum113015t1	-1.08597	-0.713762	1.71055	0.361705	1.17112	-0.667819	-1.00204	0.564332	-0.338125	AT1G19910.1	ATPase, F0/V0 complex, subunit C protein	---NA---
Storvum113142t1	0.258203	-0.00173765	-0.447741	-0.335473	2.44691	-1.00641	-0.763153	-0.190053	0.0394606	AT1G27080.1	nitrate transporter 1.6	---NA---
Storvum114043t1	-0.103282	0.525999	-0.767327	-0.891626	2.40734	-0.502595	-0.452354	-0.270851	0.0546944	AT2G19920.1	RNA-dependent RNA polymerase family protein	---NA---
Storvum116038t1	0.842995	0.857747	-0.00337379	-0.80945	1.90071	-0.768632	-0.20239	-0.876364	-0.941243	AT4G29670.1	atypical CYS HIS rich thioredoxin 2	---NA---
Storvum118574t1	-0.0424368	-0.327093	0.878289	0.284917	2.0973	-1.23964	-0.319842	-0.426474	-0.90502	AT1G26530.1	PIN domain-like family protein	---NA---
Storvum118719t1	0.768112	1.37155	-1.21723	0.134805	1.10335	-1.14811	-0.0948121	-1.18802	0.270359	NA	NA	---NA---
Storvum119360t1	-0.795079	1.99383	0.390001	-1.1829	0.644558	-1.13902	-0.168542	-0.0542345	0.311386	AT5G07830.1	glucuronidase 2	---NA---
Storvum119398t1	-0.33314	0.114275	-0.250451	0.1054	2.50954	-0.0896783	-0.808822	-0.444082	-0.803045	AT4G17020.1	transcription factor-related	---NA---
Storvum119684t1	-0.680535	-0.657134	0.518873	0.285661	1.8515	-0.592037	1.10656	-1.10548	-0.727399	NA	NA	---NA---
Storvum120753t1	1.90373	-0.626959	0.329988	-0.484301	1.27773	-0.309929	-0.188134	-1.13306	-0.769053	AT5G60020.1	laccase 17	---NA---
Storvum120983t1	1.20231	0.482184	0.201718	0.126703	1.6195	-0.686399	-0.788894	-0.745161	-1.41197	NA	NA	---NA---
Storvum123026t1	0.25943	0.0332261	0.20741	1.701	1.32029	-0.661376	-1.18161	-0.90965	-0.76872	AT1G36970.1	Domain of unknown function (DUF1985)	---NA---
Storvum123102t1	0.561653	0.410346	0.41113	-0.773488	1.85504	-1.01012	-1.00044	-0.996266	0.542142	AT1G12280.1	LRR and NB-ARC domains-containing disease resistance protein	---NA---
Storvum123140t1	0.474695	-0.196652	-0.252441	0.0642964	2.24102	-1.53917	-0.312307	-0.0601996	-0.419236	AT1G10030.1	homolog of yeast ergosterol28	---NA---
Storvum126991t1	-0.504774	1.17621	-0.125442	0.247112	1.43615	-0.488713	-1.21045	0.825338	-1.35543	AT1G26850.3	S-adenosyl-L-methionine-dependent methyltransferases superfamily protein	---NA---
Storvum127221t1	-0.738712	0.2089	0.265765	0.929377	0.912153	-0.638413	-1.01255	-1.41391	1.48738	AT5G61330.1	rRNA processing protein-related	---NA---
Storvum132278t1	0.541449	-0.548079	-0.542134	1.41289	0.911984	1.11124	-0.608647	-0.935612	-1.34309	AT4G09680.2	conserved telomere maintenance component 1	---NA---
Storvum138553t1	0.241058	-0.778787	-0.786898	-0.558551	2.48178	-0.395011	-0.254673	0.132261	-0.0811782	NA	NA	---NA---

## Sheet: Cluster 3
	Scaled expression									Arabidopsis (TAIR10) BLASTX hit		NCBI non-redundant database BLASTX hit
Accession	Mock.1d	Mock.2d	Mock.3d	A2-J.1d	A2-J.2d	A2-J.3d	A2-O.1d	A2-O.2d	A2-O.3d	AGI locus code	Short description
Storvum000264t1	1.2796	0.633244	0.54368	0.923887	-0.347277	-0.578019	0.352718	-1.0222	-1.78563	AT2G07680.1	multidrug resistance-associated protein 11	ABC transporter C family member 13 isoform X1
Storvum000325t1	1.09489	0.37163	0.714814	-0.0277632	0.0382714	-0.0469207	0.998925	-1.24943	-1.89441	AT1G22060.1		sporulation-specific protein 15-like
Storvum000358t1	1.28747	0.799754	0.960866	0.806479	-0.88119	-0.687587	0.083813	-1.00405	-1.36555	AT4G23160.1	cysteine-rich RLK (RECEPTOR-like protein kinase) 8	retrovirus-related Pol polyprotein from transposon TNT 1-94
Storvum000368t1	0.963881	0.879037	0.860002	0.433482	0.278133	-1.14764	0.323359	-0.786693	-1.80356	AT4G38070.1	basic helix-loop-helix (bHLH) DNA-binding superfamily protein	putative centromere protein
Storvum000458t1	1.22753	0.400413	0.59248	0.767749	-0.291404	-0.76284	0.807417	-0.973103	-1.76824	AT3G28860.1	ATP binding cassette subfamily B19	ABC transporter B family member 19
Storvum000464t1	1.67025	0.224042	0.468587	0.836415	-0.641823	-1.50911	0.245111	-0.0744771	-1.21899	AT1G72700.1	ATPase E1-E2 type family protein / haloacid dehalogenase-like hydrolase family protein	probable phospholipid-transporting ATPase 5
Storvum000656t1	1.44341	0.589425	0.233387	0.989132	-0.33693	-1.12652	0.234953	-0.290771	-1.73608	AT3G47570.1	Leucine-rich repeat protein kinase family protein	probable LRR receptor-like serine/threonine-protein kinase At3g47570
Storvum000790t1	1.30969	1.17253	0.409635	0.457831	-0.632691	-1.67917	0.301696	-0.267017	-1.0725	AT1G34110.1	Leucine-rich receptor-like protein kinase family protein	probable LRR receptor-like serine/threonine-protein kinase At1g34110
Storvum000877t2	0.511991	0.179574	0.670895	0.511502	-0.41001	-0.504858	1.68799	-0.993336	-1.65375	AT1G69440.1	Argonaute family protein	Protein argonaute 7
Storvum000898t1	1.08778	-0.348755	-0.348115	1.4123	-0.474981	-1.57293	1.16232	-0.226838	-0.690786	AT3G47570.1	Leucine-rich repeat protein kinase family protein	probable LRR receptor-like serine/threonine-protein kinase At3g47570
Storvum000907t1	1.52153	0.682535	0.808492	0.700382	-0.750392	-0.829769	0.188028	-0.942603	-1.3782	AT4G28650.1	Leucine-rich repeat transmembrane protein kinase family protein	MDIS1-interacting receptor like kinase 1
Storvum000923t1	1.53343	0.753044	0.731755	0.662724	-0.88953	-0.638999	0.234108	-1.14487	-1.24166	AT1G08590.1	Leucine-rich receptor-like protein kinase family protein	leucine-rich repeat receptor-like protein kinase PXL1
Storvum000975t1	1.04844	0.869615	0.803399	0.828888	-0.651161	-0.816346	0.435008	-0.833109	-1.68473	AT3G03680.1	C2 calcium/lipid-binding plant phosphoribosyltransferase family protein	protein QUIRKY
Storvum001000t1	0.877303	0.41403	1.41652	0.61942	-0.696509	-0.772333	0.622097	-0.991701	-1.48883	AT1G04150.1	C2 calcium/lipid-binding plant phosphoribosyltransferase family protein	FT-interacting protein 1
Storvum001148t1	1.00975	0.987362	1.04319	0.687395	-0.837985	-0.816957	0.252245	-0.769639	-1.55536	AT1G78580.1	trehalose-6-phosphate synthase	alpha,alpha-trehalose-phosphate synthase [UDP-forming] 1-like
Storvum001164t1	2.12563	0.276452	0.527769	0.234794	-0.406918	-0.965125	0.0443122	-0.540668	-1.29625	AT3G09040.1	Pentatricopeptide repeat (PPR) superfamily protein	pentatricopeptide repeat-containing protein At3g09040, mitochondrial
Storvum001173t1	0.811508	1.01499	0.81831	0.397543	-0.233944	-0.157131	0.480465	-1.19885	-1.93289	AT1G79620.1	Leucine-rich repeat protein kinase family protein	probable leucine-rich repeat receptor-like protein kinase At5g49770
Storvum001218t1	1.06905	0.810675	0.882936	0.818575	-0.505811	-0.964806	0.453029	-1.0918	-1.47185	AT3G43210.1	ATP binding microtubule motor family protein	kinesin-like protein NACK2
Storvum001230t1	1.24538	0.697111	0.639208	-0.00286835	-1.04371	-1.31028	1.23503	-0.449405	-1.01046	AT2G25790.1	Leucine-rich receptor-like protein kinase family protein	probably inactive leucine-rich repeat receptor-like protein kinase At2g25790
Storvum001309t1	1.1125	0.36296	0.584294	0.75197	0.009226	0.53187	-0.0824827	-1.4273	-1.84304	AT3G57330.1	autoinhibited Ca2+-ATPase 11	putative calcium-transporting ATPase 11, plasma membrane-type
Storvum001390t1	1.28593	-0.23182	0.66512	0.725507	-0.0194947	-0.783651	1.04181	-1.2328	-1.4506	AT2G20580.1	26S proteasome regulatory subunit S2 1A	26S proteasome non-ATPase regulatory subunit 2 homolog A-like
Storvum001395t1	1.38567	0.452006	-0.00412409	1.15176	-0.555532	-1.49362	0.702275	-0.524182	-1.11425	AT2G21300.2	ATP binding microtubule motor family protein	kinesin-like protein NACK2
Storvum001749t1	1.81274	0.556215	0.136694	0.645089	-0.677007	-0.920948	0.539205	-0.742414	-1.34958	AT5G03650.1	starch branching enzyme 2.2	1,4-alpha-glucan-branching enzyme-like
Storvum001764t1	1.50566	1.28125	0.315419	-0.217195	-1.40634	-1.31536	0.329818	-0.302806	-0.190456	AT3G02850.1	STELAR K+ outward rectifier	potassium channel SKOR-like
Storvum001775t1	1.07147	0.337265	0.845742	0.888413	-0.992829	-0.586408	0.825404	-0.765022	-1.62404	AT5G49360.1	beta-xylosidase 1	beta-D-xylosidase 1
Storvum001776t1	1.08589	0.86261	1.22495	0.377525	-0.367122	-0.969645	0.308584	-1.05984	-1.46295	AT3G05650.1	receptor like protein 32	receptor-like protein 12
Storvum001808t1	1.25537	0.572494	0.537544	0.789386	0.486992	-0.972761	-0.118967	-0.668723	-1.88134	AT5G54380.1	protein kinase family protein	receptor-like protein kinase THESEUS 1
Storvum001854t1	1.68415	0.322097	0.813218	0.699787	-0.841328	-0.776241	0.3249	-1.02944	-1.19714	AT2G17550.1		PREDICTED: uncharacterized protein LOC107013963
Storvum001914t1	0.812379	0.311436	0.557904	1.09164	-0.508345	-1.2614	1.14927	-0.72125	-1.43162	AT5G18980.1	ARM repeat superfamily protein	Armadillo-type fold protein
Storvum001975t1	-0.069031	1.10805	0.946763	0.260036	-0.508137	-0.476611	1.34363	-1.54789	-1.05681	AT1G11330.1	S-locus lectin protein kinase family protein	G-type lectin S-receptor-like serine/threonine-protein kinase At1g11330 isoform X1
Storvum002003t1	1.12608	0.842914	0.319703	1.22543	-1.02535	-1.21068	0.472424	-1.14461	-0.605912	AT5G41610.1	cation/H+ exchanger 18	cation/H(+) antiporter 18-like
Storvum002067t1	0.701151	0.765738	0.762601	0.235868	-1.1149	-0.117931	1.29819	-1.00044	-1.53028	AT3G43190.1	sucrose synthase 4	sucrose synthase
Storvum002087t1	1.03114	0.537475	0.588053	0.732608	-1.14316	-0.943735	1.20308	-0.768686	-1.23678	AT3G23590.1	REF4-related 1	mediator of RNA polymerase II transcription subunit 33A
Storvum002181t1	1.45582	0.4546	0.715927	0.839137	-0.495225	-1.07021	0.443959	-0.924674	-1.41933	AT2G47000.1	ATP binding cassette subfamily B4	ABC transporter B family member 11-like
Storvum002214t1	1.51941	0.611135	0.438963	0.608016	-0.421193	-0.187607	0.388213	-1.37722	-1.57972	AT3G05900.1	neurofilament protein-related	fibrous sheath CABYR-binding protein
Storvum002219t1	0.973035	0.80878	1.2993	0.667868	-0.156425	-0.219707	-0.628317	-1.2476	-1.49693	AT1G20160.2	Subtilisin-like serine endopeptidase family protein	CO(2)-response secreted protease-like
Storvum002228t1	0.917512	0.538078	1.38893	0.595559	-0.997123	-0.788329	0.595949	-0.923563	-1.32702	AT5G60010.1	ferric reductase-like transmembrane component family protein	putative respiratory burst oxidase homolog protein H isoform X1
Storvum002233t1	0.830925	0.737014	1.30601	1.02122	-0.731018	-0.393829	-0.316715	-0.896696	-1.55691	AT3G03770.2	Leucine-rich repeat protein kinase family protein	probable inactive leucine-rich repeat receptor-like protein kinase At3g03770
Storvum002323t1	1.45426	0.559253	0.671063	0.672641	-0.129565	-0.905851	0.298255	-0.91573	-1.70432	AT4G32190.1	Myosin heavy chain-related protein	putative leucine-rich repeat-containing protein DDB_G0290503
Storvum002324t1	1.27922	0.568106	0.604559	0.74521	-0.363955	-0.353016	0.535491	-1.38687	-1.62874	AT5G14210.1	Leucine-rich repeat protein kinase family protein	probable inactive leucine-rich repeat receptor-like protein kinase At3g03770
Storvum002336t1	1.0501	0.519786	0.278234	1.52396	-0.460517	-0.502818	0.296991	-1.43532	-1.27042	AT4G22120.6	ERD (early-responsive to dehydration stress) family protein	calcium permeable stress-gated cation channel 1-like
Storvum002347t1	1.18436	0.163463	1.11029	0.85616	-0.282072	-0.883157	0.374236	-0.802423	-1.72086	AT1G15690.1	Inorganic H pyrophosphatase family protein	pyrophosphate-energized vacuolar membrane proton pump-like
Storvum002383t1	1.64741	0.572819	-0.0885312	0.606449	-0.962662	-0.799526	0.999533	-0.806107	-1.16939	AT5G45540.1	Protein of unknown function (DUF594)	Disease resistance protein
Storvum002430t1	1.0363	-0.389328	0.138738	0.791069	-1.12794	-0.904484	1.54296	0.186848	-1.27416	AT1G20160.1	Subtilisin-like serine endopeptidase family protein	CO(2)-response secreted protease-like
Storvum002524t1	1.06543	1.02995	0.440838	0.98266	-1.03802	-0.586945	0.513759	-1.03104	-1.37663	AT3G46530.1	NB-ARC domain-containing disease resistance protein	putative late blight resistance protein homolog R1A-3
Storvum002549t1	1.08351	0.805068	0.998643	0.629563	-1.06979	-0.601373	0.546267	-0.95187	-1.44002	AT2G47160.1	HCO3- transporter family	boron transporter 1-like isoform X2
Storvum002551t1	0.897044	0.569758	-0.645465	0.90076	-0.990053	-0.60829	1.63549	-0.69228	-1.06696	AT1G21250.1	cell wall-associated kinase	wall-associated receptor kinase 1-like
Storvum002581t1	1.24223	0.216669	0.971279	0.940509	-0.448503	-1.05951	0.490232	-0.823022	-1.52989	AT4G02570.4	cullin 1	cullin 1
Storvum002661t1	1.40408	0.729895	0.876412	0.317946	-0.602669	-0.776686	0.593899	-1.07861	-1.46426	AT4G14650.1		PREDICTED: uncharacterized protein LOC107057828
Storvum002672t1	1.49732	0.447003	0.60045	1.28315	-0.406971	-1.05379	-0.524907	-0.532127	-1.31013	AT1G04110.1	Subtilase family protein	subtilisin-like protease SBT1.7
Storvum002723t1	1.25447	0.43203	0.799066	0.857823	-0.323196	-0.269496	0.254996	-1.27256	-1.73314	AT4G35300.4	tonoplast monosaccharide transporter2	monosaccharide-sensing protein 2-like
Storvum002728t1	0.633221	0.7314	0.89657	0.041781	-1.6801	-0.666863	1.30315	-1.12964	-0.129519	AT4G26140.1	beta-galactosidase 12	beta-galactosidase
Storvum002738t1	1.7052	-0.0498012	0.337747	1.19725	-0.62239	-1.19032	0.384734	-0.745191	-1.01723	AT1G09530.2	phytochrome interacting factor 3	transcription factor PIF3-like
Storvum002818t1	1.47905	0.543806	0.933842	0.590038	-0.726244	-0.855245	0.369693	-0.87169	-1.46325	AT5G62170.1		protein LONGIFOLIA 1 isoform X2
Storvum002855t1	0.567156	-0.462062	0.937545	1.2437	0.740177	-0.471529	0.278181	-1.1182	-1.71497	AT3G18750.3	with no lysine (K) kinase 6	probable serine/threonine-protein kinase WNK10
Storvum002856t1	1.42119	0.745192	1.04879	-0.0882493	-0.463267	-0.0537571	0.209718	-1.20911	-1.6105	AT4G02780.1	Terpenoid cyclases/Protein prenyltransferases superfamily protein	Ent-copalyl diphosphate synthase, chloroplastic
Storvum002893t1	0.642636	0.850082	0.798785	0.273552	-1.22474	-0.400771	1.31904	-0.812732	-1.44585	AT1G53430.2	Leucine-rich repeat transmembrane protein kinase	probable LRR receptor-like serine/threonine-protein kinase At1g53430 isoform X3
Storvum002908t1	-0.486931	1.30311	0.740975	0.643091	0.287973	-0.967012	0.745006	-0.43984	-1.82638	AT2G22410.1	SLOW GROWTH 1	pentatricopeptide repeat-containing protein At2g22410, mitochondrial
Storvum002922t1	1.03912	0.872679	0.907982	0.498522	-1.51498	-1.03152	0.62846	-0.281088	-1.11918	AT5G66200.1	armadillo repeat only 2	uncharacterized protein LOC101245822
Storvum002934t1	1.29297	0.666219	0.495628	0.924365	-1.22215	-0.338526	0.551211	-1.00539	-1.36433	AT1G76880.1	Duplicated homeodomain-like superfamily protein	trihelix transcription factor GT-2-like
Storvum002965t1	1.06324	0.430832	-0.674946	-0.181686	-0.373617	-0.764622	1.86883	0.0380569	-1.4061	AT3G53180.1	glutamate-ammonia ligases;catalytics;glutamate-ammonia ligases	protein fluG
Storvum002975t1	1.07593	0.166369	0.937522	1.09702	-0.867794	-1.55023	0.410878	-0.0866112	-1.18309	NA	NA	myb-like protein X
Storvum002981t1	0.788301	1.09485	0.954073	0.778487	-0.162067	-0.831781	0.132875	-1.119	-1.63574	AT2G44830.1	Protein kinase superfamily protein	serine/threonine-protein kinase D6PK-like
Storvum003026t1	1.39201	0.970218	0.794573	0.61519	-0.686718	-1.22232	0.144002	-0.768067	-1.23889	AT1G62530.2	Plant protein of unknown function (DUF863)	hypothetical protein BC332_00526
Storvum003096t1	0.908144	1.3604	0.68038	0.534891	-0.45015	-0.334021	0.141875	-1.1013	-1.74022	AT3G61830.1	auxin response factor 18	auxin response factor 9-like isoform X2
Storvum003111t1	0.104504	1.38492	0.194929	1.06033	-0.664179	0.112941	0.640233	-1.29405	-1.53963	AT3G01680.1		protein SIEVE ELEMENT OCCLUSION C
Storvum003143t1	1.76906	0.815865	-0.296784	0.408862	-0.852789	-0.970166	0.861446	-0.996217	-0.739278	AT3G46530.1	NB-ARC domain-containing disease resistance protein	putative late blight resistance protein homolog R1B-16
Storvum003175t1	1.31467	0.787589	0.93905	0.77864	-0.904579	-1.17222	0.154378	-0.67787	-1.21966	AT1G10560.1	plant U-box 18	U-box domain-containing protein 18-like
Storvum003205t1	0.915112	0.620633	0.766957	0.569602	-0.45996	-1.60067	0.878731	-0.178079	-1.51232	AT1G51190.1	Integrase-type DNA-binding superfamily protein	AP2-like ethylene-responsive transcription factor AIL1
Storvum003206t1	1.39247	0.445758	1.36661	0.568638	-0.774306	-0.755976	-0.0340574	-0.932786	-1.27635	AT3G21090.1	ABC-2 type transporter family protein	ABC transporter G family member 15-like
Storvum003262t1	0.486508	1.39658	1.24396	0.12385	-0.400404	-0.3412	0.268017	-1.23899	-1.53832	AT4G23980.1	auxin response factor 9	auxin response factor 9
Storvum003267t1	0.602268	0.222962	2.15421	-0.290407	-0.492287	-0.265972	0.229873	-0.795285	-1.36536	AT5G43900.1	myosin 2	myosin-7-like isoform X5
Storvum003307t1	0.629185	0.625707	0.727521	0.882458	0.489619	-0.832791	0.395226	-0.928884	-1.98804	AT5G51560.1	Leucine-rich repeat protein kinase family protein	protein NSP-INTERACTING KINASE 2
Storvum003313t1	1.97899	0.465161	0.138861	0.268657	-1.33778	-0.565307	0.606403	-0.565607	-0.989379	AT3G46730.1	NB-ARC domain-containing disease resistance protein	late blight resistance protein R1-A-like
Storvum003360t1	1.28457	0.346359	0.943203	0.617732	-0.470663	-0.602487	0.619259	-1.02081	-1.71716	AT5G48460.1	Actin binding Calponin homology (CH) domain-containing protein	fimbrin-2-like
Storvum003368t1	1.60592	0.299803	0.824179	0.298928	-0.728769	-0.283489	0.643168	-1.34082	-1.31892	AT3G01750.1	Ankyrin repeat family protein	serine/threonine-protein phosphatase 6 regulatory ankyrin repeat subunit B-like
Storvum003377t1	0.759766	0.581627	1.84961	0.237815	-0.460981	-0.796958	0.101844	-0.848089	-1.42463	AT3G01840.1	Protein kinase superfamily protein	protein LYK2
Storvum003396t1	0.702144	0.943088	0.835586	0.669444	-0.809993	-0.938442	0.972797	-0.896879	-1.47774	AT1G48480.1	receptor-like kinase 1	probable inactive receptor kinase At1g48480
Storvum003495t2	0.491267	-0.258262	2.1648	-0.0782524	-0.725681	-0.377346	0.678181	-1.14174	-0.752972	AT5G20600.1		ribosomal RNA processing protein 1 homolog
Storvum003496t1	2.11138	0.569788	0.264682	-0.233332	-1.17966	-0.86671	0.19359	-0.950963	0.0912223	AT1G22150.1	sulfate transporter 1;3	sulfate transporter 1.3-like
Storvum003546t1	1.22819	0.7463	1.20497	0.705501	-0.777606	-0.518413	-0.151867	-0.974837	-1.46223	AT1G12240.1	Glycosyl hydrolases family 32 protein	acid beta-fructofuranosidase-like
Storvum003603t1	1.51754	-0.852432	1.11168	-0.125908	-0.426172	0.249844	0.862266	-1.14782	-1.189	AT5G07380.2		uncharacterized protein LOC101248375 isoform X1
Storvum003664t1	1.00901	0.811273	1.0204	0.576925	0.0609951	-0.882422	0.0966216	-0.830465	-1.86233	AT2G14820.1	Phototropic-responsive NPH3 family protein	BTB/POZ domain-containing protein NPY2
Storvum003690t1	1.83054	0.496488	0.67886	0.144265	-0.438532	-0.0393701	-0.0224274	-0.996422	-1.6534	AT4G23160.1	cysteine-rich RLK (RECEPTOR-like protein kinase) 8	putative ribonuclease H-like domain-containing protein
Storvum003724t1	1.3337	0.418051	0.565917	0.586836	-0.715802	-0.450575	0.928206	-0.979446	-1.68688	AT5G50400.1	purple acid phosphatase 27	probable inactive purple acid phosphatase 27
Storvum003732t1	0.973009	0.759066	0.295988	0.907732	-1.6438	0.0877427	0.755899	-1.02396	-1.11168	AT5G66850.1	mitogen-activated protein kinase kinase kinase 5	mitogen-activated protein kinase kinase kinase YODA-like isoform X1
Storvum003758t1	1.08915	-0.61643	1.53692	0.857507	-0.593212	-1.12638	0.125729	0.0301592	-1.30345	AT4G18750.1	Pentatricopeptide repeat (PPR) superfamily protein	pentatricopeptide repeat-containing protein DOT4, chloroplastic-like
Storvum003762t1	0.957859	1.08168	0.881427	0.543229	-0.778555	-1.23964	0.596406	-0.663279	-1.37912	AT2G46850.1	Protein kinase superfamily protein	probably inactive receptor-like protein kinase At2g46850
Storvum003817t1	0.604391	0.597807	0.725675	0.287526	-1.37583	-0.870534	1.5983	-1.12608	-0.441253	AT3G18660.2	plant glycogenin-like starch initiation protein 1	UDP-glucuronate:xylan alpha-glucuronosyltransferase 1 isoform X1
Storvum003831t1	0.508341	0.216843	1.80404	-0.174823	0.136949	-0.380439	0.652309	-1.34459	-1.41863	AT1G09410.1	pentatricopeptide (PPR) repeat-containing protein	pentatricopeptide repeat-containing protein At1g09410-like
Storvum003859t1	1.78909	0.745186	0.572687	0.196726	-1.37842	0.0861916	-0.0295037	-0.942106	-1.03984	AT1G62660.1	Glycosyl hydrolases family 32 protein	vacuolar invertase
Storvum003889t1	1.41574	0.313491	1.05752	0.782477	-0.0997527	-1.50244	-0.0193596	-0.939019	-1.00865	AT5G57800.1	Fatty acid hydroxylase superfamily	protein ECERIFERUM 3
Storvum003905t1	0.930004	-0.0119286	0.895168	1.34051	-0.702534	-1.19132	0.684042	-0.606927	-1.33701	AT1G02205.2	Fatty acid hydroxylase superfamily	protein ECERIFERUM 1-like
Storvum003924t1	1.21817	0.406869	0.740475	0.860576	-0.421432	-1.17007	0.603582	-0.55078	-1.68739	AT5G20950.2	Glycosyl hydrolase family protein	beta-glucosidase BoGH3B-like
Storvum003928t1	-0.0986607	1.27279	1.29055	0.024707	-1.02732	-0.462949	1.0914	-0.874772	-1.21575	AT2G44990.1	carotenoid cleavage dioxygenase 7	carotenoid cleavage dioxygenase 7, chloroplastic
Storvum003960t1	0.774656	0.899267	1.17099	0.831939	-0.276856	-1.0102	0.0632789	-0.769413	-1.68366	AT2G31920.1	Plant protein of unknown function (DUF936)	Serine/threonine-protein kinase
Storvum003972t1	1.54552	-0.367811	0.509368	0.0233596	0.196885	-1.48043	0.749142	0.342818	-1.51885	AT1G71420.1	Tetratricopeptide repeat (TPR)-like superfamily protein	pentatricopeptide repeat-containing protein At1g71420
Storvum003997t1	0.985684	0.909759	0.770666	0.912059	-1.47924	-1.06541	0.339348	-0.242473	-1.13039	AT5G59730.1	exocyst subunit exo70 family protein H7	exocyst complex component EXO70A1-like
Storvum004006t1	-0.270925	-0.207215	-0.442973	-0.438784	0.024246	-0.739783	2.52641	0.255439	-0.706416	ATMG00300.1	Gag-Pol-related retrotransposon family protein	Retrovirus-related Pol polyprotein from transposon TNT 1-94
Storvum004083t2	1.75136	0.112126	0.681012	0.415528	-0.530214	-0.806499	0.651337	-0.724454	-1.55019	AT3G26120.1	terminal EAR1-like 1	protein terminal ear1 homolog
Storvum004154t1	1.15268	0.741698	0.897903	0.893704	-0.842707	-0.488891	0.252171	-1.0726	-1.53396	AT4G31820.1	Phototropic-responsive NPH3 family protein	BTB/POZ domain-containing protein NPY1
Storvum004174t1	0.877205	0.606654	1.02777	0.768538	-0.178365	-1.14411	0.502547	-0.684333	-1.77591	AT2G37080.1	ROP interactive partner 3	interactor of constitutive active ROPs 2, chloroplastic-like
Storvum004178t1	0.618692	0.143747	0.0990129	0.239983	-0.795304	-1.77887	1.5699	0.746081	-0.843242	AT1G18130.1	Class II aaRS and biotin synthetases superfamily protein	polyphenol oxidase, chloroplastic-like
Storvum004204t1	0.187454	1.01116	1.45166	0.359087	-0.702097	-0.421136	0.645769	-0.811187	-1.72071	AT2G14960.1	Auxin-responsive GH3 family protein	probable indole-3-acetic acid-amido synthetase GH3.1
Storvum004257t1	1.46937	0.100708	0.617009	0.843749	0.155073	-0.956381	0.272754	-0.705986	-1.7963	AT4G03400.1	Auxin-responsive GH3 family protein	jasmonic acid-amido synthetase JAR1-like
Storvum004259t1	1.10873	0.0353972	0.260314	0.291359	-0.536171	0.522875	1.27642	-1.32276	-1.63616	AT1G32450.1	nitrate transporter 1.5	protein NRT1/ PTR FAMILY 7.3-like
Storvum004271t1	1.331	1.15394	1.00243	0.387313	-1.09558	-0.997021	-0.214115	-0.414847	-1.15312	AT4G23160.1	cysteine-rich RLK (RECEPTOR-like protein kinase) 8	Cysteine-rich RLK (receptor-like protein kinase) 8
Storvum004285t1	0.957678	0.757922	1.21669	0.269702	-0.275938	-0.632268	0.464521	-0.899828	-1.85848	AT1G55490.2	chaperonin 60 beta	ruBisCO large subunit-binding protein subunit beta, chloroplastic
Storvum004313t1	1.0542	0.29738	0.43555	0.646419	-0.664004	-1.15917	1.40895	-0.571411	-1.44791	AT5G35980.2	yeast YAK1-related gene 1	Polyphenol oxidase B, chloroplastic
Storvum004357t1	0.645853	1.03102	0.657865	0.692721	-0.426095	-1.46001	0.933367	-0.669514	-1.40521	AT2G17650.1	AMP-dependent synthetase and ligase family protein	probable acyl-activating enzyme 1, peroxisomal
Storvum004467t1	1.24005	0.665203	1.25178	0.520464	-0.772937	-1.11792	0.310064	-0.906013	-1.19069	AT1G50180.1	NB-ARC domain-containing disease resistance protein	putative late blight resistance protein homolog R1A-10
Storvum004468t1	-0.0843696	0.767625	0.216322	-0.335407	-1.7088	-1.2879	1.46106	0.657602	0.313875	AT2G14960.1	Auxin-responsive GH3 family protein	probable indole-3-acetic acid-amido synthetase GH3.1
Storvum004497t1	1.32638	1.70202	0.705428	-0.326978	-1.192	-0.670626	-0.47097	-0.348291	-0.724962	AT3G10400.1	RNA recognition motif and CCHC-type zinc finger domains containing protein	Putative retrotransposon protein, identical
Storvum004512t1	1.36671	0.688439	0.553	0.678191	-1.05721	-0.532132	0.728844	-1.30772	-1.11812	AT1G72160.1	Sec14p-like phosphatidylinositol transfer family protein	patellin-3-like
Storvum004518t1	1.64369	0.573241	-0.492782	0.649655	-0.264171	-0.142539	0.740306	-1.38232	-1.32508	AT5G66020.1	Phosphoinositide phosphatase family protein	phosphoinositide phosphatase SAC6-like
Storvum004521t1	1.06813	0.581728	1.19046	0.771046	-0.603841	-0.197028	0.0405311	-1.28454	-1.56648	AT1G12110.1	nitrate transporter 1.1	protein NRT1/ PTR FAMILY 6.3-like
Storvum004558t1	1.07794	0.603677	1.29085	1.01778	-1.42149	-0.579121	-0.410405	-0.789064	-0.790172	AT3G53960.1	Major facilitator superfamily protein	protein NRT1/ PTR FAMILY 5.6-like
Storvum004590t1	0.880122	0.64833	1.14112	1.05725	-1.71675	-0.843685	-0.109839	-0.807465	-0.249084	AT1G72970.1	Glucose-methanol-choline (GMC) oxidoreductase family protein	protein HOTHEAD-like isoform X2
Storvum004602t1	1.16576	0.550201	0.448208	0.882868	-1.19301	-0.63196	0.997398	-0.912929	-1.30653	AT2G37080.1	ROP interactive partner 3	interactor of constitutive active ROPs 2, chloroplastic-like
Storvum004620t1	0.726143	0.248467	0.786252	0.796167	-0.907701	-0.502578	1.35517	-1.01001	-1.49191	AT1G73710.1	Pentatricopeptide repeat (PPR) superfamily protein	Polyphenol oxidase F, chloroplastic
Storvum004664t1	0.844253	0.900945	0.509487	1.11509	-0.925486	-1.10567	0.768751	-0.851178	-1.25619	AT3G10600.1	cationic amino acid transporter 7	cationic amino acid transporter 7, chloroplastic-like
Storvum004674t1	0.722333	0.967082	0.64357	0.744433	-1.12554	-0.568907	1.02486	-1.0717	-1.33613	AT5G62730.1	Major facilitator superfamily protein	protein NRT1/ PTR FAMILY 4.5-like
Storvum004679t1	0.0884404	0.888009	1.42201	1.32637	-0.793645	-0.895214	-0.413665	-0.309201	-1.3131	AT4G12680.1		uncharacterized membrane protein At3g27390
Storvum004725t1	0.955232	0.817297	1.38799	0.534402	-0.680621	-0.949839	0.146452	-0.671589	-1.53933	AT3G14920.1	Peptide-N4-(N-acetyl-beta-glucosaminyl)asparagine amidase A protein	peptide-N4-(N-acetyl-beta-glucosaminyl)asparagine amidase A-like
Storvum004749t1	0.641304	0.853012	0.969261	0.612959	-1.18177	-1.09595	1.06512	-0.736259	-1.12768	AT4G33330.2	plant glycogenin-like starch initiation protein 3	UDP-glucuronate:xylan alpha-glucuronosyltransferase 2-like isoform X1
Storvum004756t1	1.34169	0.787374	0.482935	0.83632	-0.997167	-0.381731	0.487466	-1.29742	-1.25947	AT4G09160.1	SEC14 cytosolic factor family protein / phosphoglyceride transfer family protein	patellin-3-like
Storvum004761t1	1.23518	0.354998	0.918744	0.598487	0.0683773	-0.902728	0.386702	-0.764322	-1.89544	AT2G39210.1	Major facilitator superfamily protein	protein NUCLEAR FUSION DEFECTIVE 4-like
Storvum004763t1	1.56963	0.635256	0.0120261	0.690306	-1.01567	-0.623686	0.903526	-0.910128	-1.26126	AT3G53950.1	glyoxal oxidase-related protein	aldehyde oxidase GLOX
Storvum004778t1	0.134247	1.00169	1.28485	-0.164613	-1.38984	-0.653023	1.2254	-0.268783	-1.16993	AT5G60020.1	laccase 17	laccase-17-like
Storvum004854t1	1.53086	0.504396	0.166234	1.12476	-1.02563	-0.687495	0.511657	-1.24354	-0.881242	AT2G05160.1	CCCH-type zinc fingerfamily protein with RNA-binding domain	zinc finger CCCH domain-containing protein 18-like isoform X2
Storvum004918t1	0.232304	0.401984	1.10228	0.456834	-0.549056	-0.474663	1.38983	-0.71994	-1.83957	AT1G19900.1	glyoxal oxidase-related protein	galactose oxidase-like
Storvum004923t1	0.765811	1.26458	0.371601	0.312709	-0.983694	-0.641004	1.22908	-1.14868	-1.1704	AT2G30210.1	laccase 3	laccase-3-like
Storvum004938t1	0.716369	1.25021	0.993889	0.378577	-1.32238	-0.69239	0.669963	-0.744913	-1.24933	AT5G60020.1	laccase 17	laccase-17-like
Storvum004946t1	0.0453835	-0.311122	1.12439	0.660265	-0.237455	-0.412065	1.50685	-0.524452	-1.85179	AT5G06440.3		PREDICTED: uncharacterized protein LOC102588943 isoform X1
Storvum004955t1	1.19803	1.01987	0.933543	0.56532	-0.635254	-0.581077	0.115205	-1.02654	-1.5891	AT3G50780.1		BTB/POZ domain-containing protein At3g50780
Storvum004964t1	0.913495	0.839634	1.20853	0.841093	-0.520144	-1.10292	0.0406557	-0.698507	-1.52184	AT2G30900.1	TRICHOME BIREFRINGENCE-LIKE 43	protein trichome birefringence-like 43
Storvum004975t1	1.12972	1.16117	0.692288	0.770632	-1.502	-1.29329	-0.116444	-0.368308	-0.473757	AT3G10720.2	Plant invertase/pectin methylesterase inhibitor superfamily	probable pectinesterase/pectinesterase inhibitor 25
Storvum004999t1	1.1068	0.626431	0.987007	0.511808	-0.224048	-1.39621	0.603637	-0.702494	-1.51293	AT1G51190.1	Integrase-type DNA-binding superfamily protein	AP2-like ethylene-responsive transcription factor PLT2
Storvum005060t1	1.12695	0.724787	1.23186	0.580113	-0.307857	-1.20483	0.0647274	-0.692368	-1.52338	AT3G29180.2	Protein of unknown function (DUF1336)	protein ENHANCED DISEASE RESISTANCE 2-like
Storvum005077t1	1.21761	0.199763	1.12346	0.231053	0.289743	-0.509378	0.367402	-1.00078	-1.91886	AT3G63240.1	DNAse I-like superfamily protein	type I inositol polyphosphate 5-phosphatase 4
Storvum005164t1	0.927043	0.246751	0.69713	1.14154	-0.792734	-1.28655	0.878847	-0.361562	-1.45047	AT5G21482.1	cytokinin oxidase 7	cytokinin dehydrogenase 7
Storvum005170t1	1.03257	0.683913	0.518497	1.49664	-0.504328	-1.15562	0.00100193	-0.705054	-1.36762	AT3G24550.1	proline extensin-like receptor kinase 1	proline-rich receptor-like protein kinase PERK1
Storvum005172t1	1.0062	0.753965	1.03146	1.01086	-0.740576	-1.03942	0.175107	-0.738843	-1.45875	AT5G51490.1	Plant invertase/pectin methylesterase inhibitor superfamily	probable pectinesterase/pectinesterase inhibitor 59
Storvum005219t1	1.34856	1.13188	0.0222983	0.265134	0.204789	-0.772673	0.369628	-0.671455	-1.89816	AT5G48570.1	FKBP-type peptidyl-prolyl cis-trans isomerase family protein	70 kDa peptidyl-prolyl isomerase-like isoform X3
Storvum005247t1	0.756815	0.867117	0.486175	0.053123	-0.388191	-0.204541	1.33218	-1.09346	-1.80922	AT1G60420.1	DC1 domain-containing protein	probable nucleoredoxin 1
Storvum005268t1	1.33297	0.416706	0.793552	0.543173	-0.569974	-1.35187	0.8508	-0.677778	-1.33758	AT3G07130.1	purple acid phosphatase 15	purple acid phosphatase 15 isoform X2
Storvum005298t3	1.08828	0.444391	1.04434	0.793382	-0.108395	-0.588613	0.262371	-1.18354	-1.75221	AT2G39130.1	Transmembrane amino acid transporter family protein	vacuolar amino acid transporter 1-like
Storvum005339t1	0.855365	0.589757	0.699992	-0.0565595	0.336382	-0.363548	1.00306	-1.04208	-2.02237	AT1G20560.1	acyl activating enzyme 1	probable acyl-activating enzyme 1, peroxisomal
Storvum005375t1	1.49955	0.394495	0.851904	0.68478	-0.198923	-1.18439	0.242735	-0.772654	-1.5175	AT3G08820.1	Pentatricopeptide repeat (PPR) superfamily protein	UDP-N-acetylmuramate--L-alanine ligase-like
Storvum005393t1	0.712938	0.985422	0.834419	0.277431	-0.757569	-0.268724	0.909502	-0.777996	-1.91542	AT2G46570.1	laccase 6	laccase-6 isoform X2
Storvum005477t1	0.36322	-0.454441	-0.734746	1.92223	0.44115	-0.81691	1.02106	-0.923977	-0.817595	AT3G54700.1	phosphate transporter 1;7	inorganic phosphate transporter 1-4-like
Storvum005509t1	1.1202	0.178186	0.851081	0.983684	-0.841853	-0.644327	0.846209	-1.05489	-1.43829	AT3G48000.1	aldehyde dehydrogenase 2B4	aldehyde dehydrogenase family 2 member B7, mitochondrial-like
Storvum005512t1	1.289	0.733544	0.719132	0.708204	-0.52111	-1.60656	0.279776	-0.268234	-1.33375	AT5G03795.1	Exostosin family protein	probable glycosyltransferase At5g03795
Storvum005522t1	1.28176	0.654337	0.481674	0.638531	-0.0665487	0.0638855	0.0912485	-1.16796	-1.97693	AT3G22104.1	Phototropic-responsive NPH3 family protein	BTB/POZ domain-containing protein At3g22104 isoform X2
Storvum005540t1	0.907771	1.07746	0.606134	0.112213	-0.968113	-0.406204	1.17075	-1.11378	-1.38623	AT3G59690.1	IQ-domain 13	Protein IQ-DOMAIN 14
Storvum005564t1	1.60108	0.385974	0.746303	0.687142	-1.00985	-1.07745	0.475725	-0.576355	-1.23257	AT5G61790.1	calnexin 1	calnexin homolog 1-like
Storvum005573t1	1.02513	1.06598	0.361463	0.728666	-0.472685	-0.169144	0.46637	-1.21625	-1.78953	AT4G33220.1	pectin methylesterase 44	pectinesterase/pectinesterase inhibitor PPE8B-like
Storvum005665t1	-0.150827	1.96837	0.250259	0.824891	-1.24141	-1.31537	0.00896979	-0.0522973	-0.292586	AT4G23030.1	MATE efflux family protein	protein DETOXIFICATION 49-like
Storvum005688t1	1.01257	0.488408	0.994502	0.390392	-0.466275	0.176741	0.532816	-1.27617	-1.85299	AT5G03760.1	Nucleotide-diphospho-sugar transferases superfamily protein	glucomannan 4-beta-mannosyltransferase 9-like
Storvum005701t1	0.308948	0.906988	0.338584	-0.349225	-1.51655	-0.725176	1.89651	-0.267357	-0.592722	AT2G32990.1	glycosyl hydrolase 9B8	endoglucanase 11-like
Storvum005732t1	1.3554	0.76024	0.949545	0.574908	-0.502102	-0.529179	0.0566646	-0.968715	-1.69676	AT1G31830.1	Amino acid permease family protein	probable polyamine transporter At1g31830 isoform X1
Storvum005832t1	1.34262	0.698583	0.91982	0.658718	-1.203	-0.502515	0.364666	-1.13975	-1.13914	AT5G22400.1	Rho GTPase activating protein with PAK-box/P21-Rho-binding domain	rho GTPase-activating protein 5-like
Storvum005848t1	1.10498	1.06924	-0.0685898	0.498573	-0.458236	-1.33991	0.827007	0.00799589	-1.64107	AT4G39490.1	cytochrome P450, family 96, subfamily A, polypeptide 10	alkane hydroxylase MAH1-like
Storvum005896t1	0.605922	1.03372	0.798962	0.296534	-1.09567	-0.648955	1.26767	-1.30181	-0.956377	AT3G55990.1	Plant protein of unknown function (DUF828)	protein ESKIMO 1-like
Storvum005920t1	0.645413	0.493396	0.254135	-0.0885768	-1.04224	-1.66423	1.80773	-0.0274543	-0.37817	AT5G42650.1	allene oxide synthase	allene oxide synthase, chloroplastic
Storvum005998t1	1.33827	0.909151	0.242433	0.492037	-0.226908	-0.611908	0.699473	-1.16993	-1.67263	AT2G38510.1	MATE efflux family protein	protein DETOXIFICATION 53
Storvum006047t1	-0.0806661	-0.147009	-0.619008	0.545493	-1.25642	0.256837	2.27376	-0.446073	-0.526914	AT3G26300.1	cytochrome P450, family 71, subfamily B, polypeptide 34	premnaspirodiene oxygenase-like
Storvum006074t1	0.386778	0.999615	-0.150049	0.56777	-1.88602	-0.181119	1.45807	-0.402074	-0.792973	AT1G02640.1	beta-xylosidase 2	probable beta-D-xylosidase 2
Storvum006094t1	0.963114	0.875365	0.508408	0.232956	-0.748147	-1.10876	1.32308	-1.44768	-0.598334	AT2G26710.1	Cytochrome P450 superfamily protein	cytochrome P450 734A1-like
Storvum006102t1	1.21488	0.948375	0.456231	0.986897	-0.986513	-0.949857	0.449379	-0.815502	-1.30389	AT3G26590.1	MATE efflux family protein	protein DETOXIFICATION 29-like
Storvum006131t1	0.93128	1.01838	1.20604	0.492785	-1.07837	-0.486257	0.24433	-0.82572	-1.50247	AT5G57480.1	P-loop containing nucleoside triphosphate hydrolases superfamily protein	AAA-ATPase At4g25835-like
Storvum006143t1	1.19148	0.817317	0.489146	0.798465	-0.614058	-0.521478	0.619052	-1.126	-1.65392	AT5G07990.1	Cytochrome P450 superfamily protein	flavonoid 3',5'-hydroxylase
Storvum006261t1	1.1645	0.604626	0.701951	0.968957	-0.567839	-1.00721	0.582352	-0.927027	-1.52031	AT1G01110.2	IQ-domain 18	protein IQ-DOMAIN 1-like
Storvum006300t1	1.123	0.189802	0.69001	0.815856	-0.333514	-0.185447	0.783067	-1.3824	-1.70037	AT2G22240.1	myo-inositol-1-phosphate synthase 2	inositol-3-phosphate synthase
Storvum006329t1	1.23395	0.383818	0.0406095	1.1677	-0.544212	-1.43909	0.790942	-0.252216	-1.3815	AT3G19430.1	late embryogenesis abundant protein-related / LEA protein-related	PREDICTED: uncharacterized protein LOC102599540
Storvum006349t1	1.19551	-0.117627	-0.110464	1.04185	-1.16471	-0.945011	1.48884	-0.573272	-0.815114	AT4G02330.1	Plant invertase/pectin methylesterase inhibitor superfamily	probable pectinesterase/pectinesterase inhibitor 20
Storvum006401t1	1.15298	0.187704	0.817297	0.732342	0.124426	-1.03023	0.667904	-0.884334	-1.76808	AT5G09890.1	Protein kinase family protein	serine/threonine-protein kinase 38-like
Storvum006504t1	1.05742	0.00521987	0.0860241	1.35173	-0.657538	0.262727	0.643221	-0.953606	-1.79521	AT3G14240.1	Subtilase family protein	subtilisin-like protease SBT1.9
Storvum006533t1	1.12738	0.902529	0.805601	0.718472	-0.759092	-1.16942	0.49356	-0.661557	-1.45747	AT3G45010.1	serine carboxypeptidase-like 48	serine carboxypeptidase-like
Storvum006620t1	1.19838	0.53027	0.39874	0.862722	-0.543409	-1.40657	0.88293	-0.473138	-1.44992	AT1G70710.1	glycosyl hydrolase 9B1	endoglucanase 8-like
Storvum006644t1	1.18749	0.526771	0.515704	1.18969	-0.709385	-1.12528	0.52487	-0.63047	-1.47939	AT4G15480.1	UDP-Glycosyltransferase superfamily protein	cinnamate beta-D-glucosyltransferase-like
Storvum006680t1	1.46542	0.52144	0.707207	0.862056	-0.00757513	-1.29714	0.0364264	-1.00916	-1.27867	AT1G64760.2	O-Glycosyl hydrolases family 17 protein	glucan endo-1,3-beta-glucosidase 8-like
Storvum006740t1	1.34909	0.0893068	0.639162	1.00306	-0.938832	-0.2584	0.690405	-1.38761	-1.18618	AT2G36770.1	UDP-Glycosyltransferase superfamily protein	zeatin O-glucosyltransferase-like
Storvum006748t1	0.139888	1.21802	0.890813	1.05513	-1.60629	-1.20893	-0.456249	0.395908	-0.428285	AT1G03840.1	C2H2 and C2HC zinc fingers superfamily protein	protein indeterminate-domain 12-like
Storvum006809t3	0.169398	0.371164	1.40401	0.127957	-1.18006	-0.54068	1.53969	-0.973961	-0.917512	AT3G10230.1	lycopene cyclase	capsanthin/capsorubin synthase
Storvum006832t1	0.842422	1.11232	0.854861	0.783599	-0.46302	-1.27456	0.363186	-0.73799	-1.48082	AT5G03795.1	Exostosin family protein	probable glycosyltransferase At5g03795
Storvum006838t1	0.551175	0.485425	1.17203	0.15939	-0.834645	-0.434589	1.41244	-1.13744	-1.37378	AT1G19630.1	cytochrome P450, family 722, subfamily A, polypeptide 1	abscisic acid 8'-hydroxylase 3-like
Storvum006848t1	1.17813	0.767772	0.777726	0.53927	-0.562957	-0.672683	0.730581	-1.48109	-1.27674	AT5G59010.1	Protein kinase protein with tetratricopeptide repeat domain	probable serine/threonine-protein kinase At5g41260
Storvum006864t1	0.908511	0.918579	0.923625	0.629138	-0.963883	-1.64543	0.104053	0.288005	-1.16259	AT5G59070.1	UDP-Glycosyltransferase superfamily protein	D-inositol 3-phosphate glycosyltransferase 1
Storvum006874t1	1.85093	-0.0220255	0.0641007	0.522508	-1.64118	-0.438131	0.844111	-0.621147	-0.55916	AT5G25320.1	ACT-like superfamily protein	ACT domain-containing protein ACR2
Storvum006893t1	0.898608	-0.639903	0.536054	0.758079	-0.31596	-1.24926	1.68239	-0.70154	-0.968464	AT1G71140.1	MATE efflux family protein	protein DETOXIFICATION 14-like
Storvum006898t1	0.522641	0.786028	1.57658	0.657728	-0.911778	-0.558179	0.206863	-0.68928	-1.5906	AT5G26250.1	Major facilitator superfamily protein	sugar transport protein 8-like
Storvum006941t1	1.28032	0.425933	0.859176	0.0235324	0.509443	-0.564445	0.345848	-0.89389	-1.98591	AT4G08250.1	GRAS family transcription factor	nodulation-signaling pathway 2 protein-like
Storvum006943t1	1.46018	-0.170765	0.908521	1.16865	-0.571928	-1.02828	0.265311	-0.762037	-1.26965	AT5G12460.1	Protein of unknown function (DUF604)	PREDICTED: uncharacterized protein LOC107004361
Storvum007077t1	0.975733	0.787082	0.775394	0.376302	-0.611446	-1.54151	0.70384	0.0938635	-1.55925	AT4G19460.1	UDP-Glycosyltransferase superfamily protein	phosphatidylinositol N-acetylglucosaminyltransferase subunit A
Storvum007084t1	0.939256	0.608593	0.757143	1.3803	-0.888374	-1.42152	0.158437	-0.408049	-1.12579	AT2G38120.1	Transmembrane amino acid transporter family protein	auxin transporter-like protein 4
Storvum007144t1	1.31299	0.484553	1.07212	0.756771	-0.893307	-0.860932	0.25327	-0.584734	-1.54073	AT1G12330.1		IRK-interacting protein isoform X2
Storvum007195t1	0.463672	0.620629	0.312379	0.620509	0.324978	-0.517956	1.26565	-1.25523	-1.83463	AT5G42240.1	serine carboxypeptidase-like 42	serine carboxypeptidase-like 42
Storvum007241t1	1.39077	0.285161	0.806175	0.929891	-0.551757	-0.825233	0.467985	-0.993713	-1.50928	AT2G48020.1	Major facilitator superfamily protein	sugar transporter ERD6-like 7
Storvum007258t1	0.8284	1.01438	0.824957	1.03233	-0.0795389	-0.981976	-0.0794066	-0.900763	-1.65838	AT4G23020.2		Testis-expressed sequence 10 protein
Storvum007260t1	0.629165	0.96635	0.816996	1.25874	-0.411518	-0.819519	0.176909	-1.06209	-1.55503	AT3G26610.1	Pectin lyase-like superfamily protein	polygalacturonase At1g48100
Storvum007265t1	1.36234	0.350877	0.898059	0.862667	-0.727339	-1.19351	0.429989	-0.564035	-1.41904	AT3G11340.1	UDP-Glycosyltransferase superfamily protein	UDP-glucose iridoid glucosyltransferase-like
Storvum007419t1	0.997729	0.804877	0.412336	1.28831	-0.731284	-0.939331	0.43473	-0.715133	-1.55223	AT2G22590.1	UDP-Glycosyltransferase superfamily protein	putative UDP-rhamnose:rhamnosyltransferase 1
Storvum007446t1	1.05559	0.539107	1.23657	0.956031	-1.07599	-1.1842	0.0966802	-0.448422	-1.17536	AT4G33590.1		PREDICTED: uncharacterized protein LOC107015835
Storvum007459t1	0.675013	1.48032	1.22533	0.0700329	-1.06805	-1.39589	0.16776	-0.400061	-0.754463	AT3G23160.1	Protein of unknown function (DUF668)	Kinesin-like protein
Storvum007477t1	1.40576	0.408337	0.0580926	0.365214	0.552678	-1.68081	0.834023	-0.917008	-1.02629	AT5G63290.1	Radical SAM superfamily protein	oxygen-independent coproporphyrinogen-III oxidase-like protein sll1917
Storvum007498t1	1.39759	0.601099	-0.0998183	0.949733	-0.84745	-1.10234	0.923884	-0.507956	-1.31475	AT2G44380.1	Cysteine/Histidine-rich C1 domain family protein	uncharacterized LOC107857153
Storvum007516t1	1.92194	-0.729367	-0.0192203	0.343731	-0.514692	-0.659578	1.09759	-0.12287	-1.31753	AT5G67090.1	Subtilisin-like serine endopeptidase family protein	subtilisin-like protease SBT1.9
Storvum007588t1	1.07463	0.784362	0.564347	0.628928	-0.328806	-0.435476	0.746141	-1.34608	-1.68804	AT1G77690.1	like AUX1 3	auxin transporter-like protein 3
Storvum007650t1	1.46932	0.110196	1.14066	0.856783	-0.869711	-0.991693	0.232849	-1.19956	-0.748843	AT1G34340.1	alpha/beta-Hydrolases superfamily protein	embryogenesis-associated protein EMB8-like isoform X1
Storvum007675t1	1.2774	0.791473	0.376838	1.26712	-0.240878	-0.948375	-0.278243	-0.654382	-1.59096	AT5G42930.1	alpha/beta-Hydrolases superfamily protein	phospholipase A1-IIalpha-like isoform X2
Storvum007725t1	1.35004	0.762773	0.570162	1.04748	-1.22687	0.06302	-0.378687	-1.34613	-0.841785	AT1G09750.1	Eukaryotic aspartyl protease family protein	aspartyl protease AED3-like
Storvum007741t1	0.009596	1.25257	1.25794	-0.181195	-1.23325	-1.16801	-0.571258	-0.520894	1.15451	AT4G19230.1	cytochrome P450, family 707, subfamily A, polypeptide 1	abscisic acid 8'-hydroxylase 1
Storvum007759t1	0.922198	0.894311	0.859242	0.588607	0.405326	-0.970504	0.124886	-1.13314	-1.69093	AT2G39370.1		probable membrane-associated kinase regulator 4
Storvum007767t1	1.24709	0.536667	0.0465032	1.26226	-1.0366	-1.27616	0.774824	-0.934503	-0.620083	AT5G13460.1	IQ-domain 11	protein IQ-DOMAIN 14
Storvum007803t1	0.670033	0.0992062	0.570051	1.67415	-0.758745	-1.10255	0.706214	-0.483814	-1.37454	AT3G52820.1	purple acid phosphatase 22	purple acid phosphatase 22-like
Storvum007812t1	0.484727	0.0731432	1.80761	0.434156	0.23997	-1.25164	0.301775	-0.594875	-1.49486	AT3G42180.1	Exostosin family protein	probable glycosyltransferase At3g42180
Storvum007827t1	1.29064	0.142709	0.907388	0.187971	-0.621329	0.444611	0.636685	-1.49246	-1.49621	AT2G27920.1	serine carboxypeptidase-like 51	serine carboxypeptidase-like 51
Storvum007837t1	1.33002	0.73025	0.620295	0.835903	-0.73849	-0.450857	0.37531	-1.15985	-1.54257	AT4G14750.1	IQ-domain 19	protein IQ-DOMAIN 14
Storvum007864t1	1.42473	0.870869	0.763864	0.300181	-1.06455	-0.57699	0.596009	-1.0171	-1.29701	AT1G61740.1	Sulfite exporter TauE/SafE family protein	sulfite exporter TauE/SafE family protein 2-like
Storvum007912t1	0.9314	1.16004	0.98923	0.564025	-0.888744	-1.0016	0.410582	-0.778328	-1.3866	AT3G51860.1	cation exchanger 3	vacuolar cation/proton exchanger 3
Storvum007914t1	0.817437	0.794322	0.647288	1.07436	-0.97717	-0.27206	0.63432	-1.33398	-1.38451	AT5G25110.1	CBL-interacting protein kinase 25	CBL-interacting serine/threonine-protein kinase 5-like
Storvum007941t1	0.721193	1.40112	0.667146	0.961418	-0.720364	-0.337055	-0.0499985	-1.22587	-1.41759	AT2G11810.1	monogalactosyldiacylglycerol synthase type C	monogalactosyldiacylglycerol synthase 2, chloroplastic-like
Storvum007967t1	0.672564	0.740263	1.20459	1.0324	-0.557543	-0.976863	0.308597	-0.908259	-1.51575	AT5G19160.1	TRICHOME BIREFRINGENCE-LIKE 11	protein trichome birefringence-like 11
Storvum008047t1	0.896665	0.550139	0.629901	1.20918	-0.261213	-1.11846	0.59458	-0.907801	-1.593	AT1G03220.1	Eukaryotic aspartyl protease family protein	basic 7S globulin-like
Storvum008110t1	1.53439	0.464058	0.170216	1.34885	-0.879078	-0.0255982	-0.300732	-1.0058	-1.3063	AT1G01430.1	TRICHOME BIREFRINGENCE-LIKE 25	Protein trichome birefringence-like 25
Storvum008130t1	0.519563	0.482476	0.864504	1.69101	-0.903778	-1.13377	-0.624967	-1.15357	0.258529	AT1G61900.1		uncharacterized GPI-anchored protein At1g61900-like isoform X1
Storvum008142t1	1.69098	0.811302	0.334242	0.73149	-0.922122	-0.589833	0.216426	-1.0714	-1.20109	AT2G36430.1	Plant protein of unknown function (DUF247)	UPF0481 protein At3g47200
Storvum008179t1	1.42452	0.897178	0.042228	1.21864	-1.1362	-1.10034	0.164097	-0.684113	-0.82601	AT1G49030.1	PLAC8 family protein	protein PLANT CADMIUM RESISTANCE 6
Storvum008193t1	1.01064	0.905104	1.41353	0.546711	-0.462281	-1.46869	-0.503768	-0.40494	-1.0363	AT5G24318.1	O-Glycosyl hydrolases family 17 protein	glucan endo-1,3-beta-glucosidase-like
Storvum008227t1	1.17317	0.695203	0.390481	0.952629	-0.733627	-0.794612	0.794444	-0.914665	-1.56302	AT5G66330.1	Leucine-rich repeat (LRR) family protein	probable LRR receptor-like serine/threonine-protein kinase At4g36180
Storvum008243t1	1.52482	0.127258	0.723555	0.475572	-1.34009	-0.259023	0.798605	-0.634408	-1.41629	AT2G30360.1	SOS3-interacting protein 4	CBL-interacting serine/threonine-protein kinase 14-like
Storvum008264t1	1.92369	-0.380193	0.846297	0.223271	-1.26992	-1.31537	0.151129	-0.148894	-0.030014	AT3G22250.1	UDP-Glycosyltransferase superfamily protein	UDP-glycosyltransferase 82A1
Storvum008294t1	0.945724	0.427038	1.33212	0.552965	-0.448596	-0.792802	0.432078	-0.580525	-1.86801	AT3G54320.3	Integrase-type DNA-binding superfamily protein	ethylene-responsive transcription factor WRI1
Storvum008295t1	1.17574	0.867079	-0.103238	0.0909494	0.540389	-0.719445	0.993707	-1.45631	-1.38887	AT3G52910.1	growth-regulating factor 4	growth-regulating factor 3-like
Storvum008327t2	1.07462	0.916205	0.11202	1.21555	-0.598859	-1.38792	0.463718	-0.44819	-1.34715	AT1G03220.1	Eukaryotic aspartyl protease family protein	basic 7S globulin-like
Storvum008334t1	1.28105	0.387093	0.386208	1.03242	-1.00184	-0.759927	0.931286	-1.13608	-1.12021	AT3G26040.1	HXXXD-type acyl-transferase family protein	acylsugar acyltransferase 3-like
Storvum008348t1	0.335614	0.812865	0.431553	0.128348	-1.40911	-0.68755	1.86145	-0.648697	-0.824476	AT2G38320.1	TRICHOME BIREFRINGENCE-LIKE 34	Protein trichome birefringence-like 34
Storvum008396t1	1.11868	0.602487	0.998501	0.893618	-0.439148	-0.771944	0.241719	-0.970025	-1.67388	AT1G01090.1	pyruvate dehydrogenase E1 alpha	pyruvate dehydrogenase E1 component subunit alpha-3, chloroplastic-like
Storvum008407t1	0.375971	1.23363	0.962327	1.11478	-0.480158	-1.17454	0.0540891	-0.607712	-1.47839	AT2G37730.1	Protein of unknown function (DUF604)	PREDICTED: uncharacterized protein LOC104214722
Storvum008409t1	1.31393	0.554305	1.04883	0.775243	-0.790464	-0.59224	0.209733	-1.06969	-1.44965	AT3G07010.1	Pectin lyase-like superfamily protein	probable pectate lyase 8
Storvum008431t1	1.04153	1.15655	0.777206	1.02224	-0.455509	-0.805529	-0.352092	-0.962419	-1.42197	AT2G46210.1	Fatty acid/sphingolipid desaturase	delta(8)-fatty-acid desaturase-like
Storvum008448t1	0.390208	0.807374	1.53167	0.84852	-0.675842	-0.840301	0.204078	-0.709375	-1.55633	AT4G24670.2	tryptophan aminotransferase related 2	Tryptophan aminotransferase-related protein 2
Storvum008458t1	0.919047	1.54827	0.806912	0.327459	-0.524389	-0.857555	0.177498	-0.992952	-1.40429	AT2G14830.1	Regulator of Vps4 activity in the MVB pathway protein	IST1 domain-containing protein
Storvum008481t1	0.722496	0.989476	1.24887	0.777131	-0.715186	-1.16326	0.159912	-0.559157	-1.46028	AT5G35770.1	Transducin/WD40 repeat-like superfamily protein	transcriptional regulator STERILE APETALA-like
Storvum008487t1	1.30638	0.704281	0.720297	0.888133	-0.805603	-0.704372	0.367705	-0.971884	-1.50494	AT3G07010.1	Pectin lyase-like superfamily protein	probable pectate lyase 8
Storvum008488t1	0.599325	1.49878	1.13797	0.613138	-0.0931627	-1.02148	-0.572225	-1.1365	-1.02585	AT5G17230.2	PHYTOENE SYNTHASE	phytoene synthase 2, chloroplastic
Storvum008497t1	1.39219	0.538603	0.585454	0.951502	-0.769779	-0.733084	0.499986	-1.00237	-1.4625	AT3G26040.1	HXXXD-type acyl-transferase family protein	acylsugar acyltransferase 3-like
Storvum008514t1	1.22683	0.82019	0.245963	0.98473	-0.0620665	-1.48401	0.333616	-0.619162	-1.44609	AT1G03220.1	Eukaryotic aspartyl protease family protein	basic 7S globulin-like
Storvum008552t1	0.816762	-0.147411	0.608144	1.02923	0.13934	-1.23695	1.19804	-1.20918	-1.19798	AT2G39710.1	Eukaryotic aspartyl protease family protein	aspartic proteinase PCS1
Storvum008558t1	1.28331	0.251679	0.633809	0.479685	-0.702167	0.217254	0.814802	-1.58535	-1.39302	AT2G35880.1	TPX2 (targeting protein for Xklp2) protein family	protein WVD2-like 4
Storvum008575t1	1.35805	0.792025	0.596	0.572034	-0.996969	0.0696211	0.336604	-1.2783	-1.44907	AT3G26040.1	HXXXD-type acyl-transferase family protein	acylsugar acyltransferase 3-like
Storvum008577t1	1.41689	0.789092	0.714163	0.754703	-1.03489	-0.121346	0.00383163	-1.15381	-1.36863	AT3G20300.1	Protein of unknown function (DUF3537)	PREDICTED: uncharacterized protein LOC107001757
Storvum008593t1	0.82317	0.76694	0.797023	0.654412	-0.705811	0.0451427	0.644448	-1.2136	-1.81173	AT3G26040.1	HXXXD-type acyl-transferase family protein	vinorine synthase-like
Storvum008597t1	0.758679	0.864771	0.968208	1.13539	-1.18989	-0.920055	0.337434	-0.691164	-1.26337	AT3G57920.1	squamosa promoter binding protein-like 15	squamosa promoter-binding-like protein 9
Storvum008599t1	1.04197	0.824781	0.816697	0.679871	-1.04375	0.18639	0.285251	-1.35157	-1.43963	AT5G15900.1	TRICHOME BIREFRINGENCE-LIKE 19	protein trichome birefringence-like 19
Storvum008616t1	1.10553	0.119388	0.747955	0.544328	-0.955359	-0.273564	1.25304	-1.02466	-1.51665	AT3G26040.1	HXXXD-type acyl-transferase family protein	acylsugar acyltransferase 3-like
Storvum008620t1	1.33337	0.892518	0.576382	0.546946	0.477181	-0.927022	-0.206278	-1.20845	-1.48465	AT5G49100.1		uncharacterized protein DDB_G0271670
Storvum008645t1	1.18864	0.307586	0.839266	0.767426	-0.37391	-0.837279	0.743474	-0.909262	-1.72594	AT5G35630.3	glutamine synthetase 2	Glutamine synthetase leaf isozyme, chloroplastic
Storvum008675t2	1.15928	0.79346	0.974579	0.833436	-0.931448	-0.81754	0.217938	-0.719354	-1.51035	AT5G25830.1	GATA transcription factor 12	GATA transcription factor 12
Storvum008677t1	1.25038	1.21402	0.705365	0.479426	-0.613405	-0.940009	0.289107	-1.03747	-1.34741	AT5G44680.1	DNA glycosylase superfamily protein	DNA-3-methyladenine glycosylase 1-like
Storvum008690t1	1.39118	0.653058	0.936057	0.945374	-0.751692	-1.37356	-0.174394	-0.634005	-0.992019	AT1G02810.1	Plant invertase/pectin methylesterase inhibitor superfamily	probable pectinesterase/pectinesterase inhibitor 7
Storvum008697t1	0.815734	0.658309	1.72	0.624871	-1.00225	-0.891998	-0.381336	-0.315681	-1.22765	AT1G55580.1	GRAS family transcription factor	scarecrow-like protein 18
Storvum008700t1	0.933151	0.436605	1.22584	0.537778	-1.25113	-0.756471	0.924847	-0.86521	-1.18541	AT3G16210.1	F-box family protein	putative F-box protein At3g25460 isoform X1
Storvum008752t1	0.783529	0.782049	0.820828	0.334199	-0.812334	0.107302	0.942046	-1.31084	-1.64678	AT3G23090.1	TPX2 (targeting protein for Xklp2) protein family	protein WVD2-like 1
Storvum008843t1	1.28207	0.612354	0.483208	0.893472	-1.12944	-0.433835	0.721024	-1.12461	-1.30425	AT5G01360.1	Plant protein of unknown function (DUF828)	protein trichome birefringence-like 3
Storvum008873t1	0.955446	0.90006	0.597333	0.00869421	-1.24795	-1.42297	0.96598	0.369559	-1.12615	AT5G10150.1	Domain of unknown function (DUF966)	protein UPSTREAM OF FLC
Storvum009040t1	0.957505	0.568008	0.495743	1.10735	-0.974269	-0.107865	0.714492	-1.32686	-1.43411	AT4G29310.1	Protein of unknown function (DUF1005)	PREDICTED: uncharacterized protein LOC102579879
Storvum009055t1	0.589947	0.854448	1.11881	1.04084	-0.989411	-0.798016	0.511016	-1.14226	-1.18538	AT3G18930.2	RING/U-box superfamily protein	RING-H2 finger protein ATL65
Storvum009070t1	1.79145	-0.0287052	0.678293	-0.214762	-0.860383	-1.27366	1.04464	-0.265359	-0.871506	AT5G66330.1	Leucine-rich repeat (LRR) family protein	LRR receptor-like serine/threonine-protein kinase FLS2
Storvum009074t1	0.909108	0.740993	0.835081	0.93627	-0.660931	-1.45354	0.54753	-0.436597	-1.41791	AT3G19430.1	late embryogenesis abundant protein-related / LEA protein-related	uncharacterized protein LOC101257909
Storvum009158t1	1.03676	0.653019	0.750398	0.729984	-0.127478	-0.950063	0.679406	-1.08583	-1.68619	AT1G23000.1	Heavy metal transport/detoxification superfamily protein	heavy metal-associated isoprenylated plant protein 37
Storvum009175t1	-0.592266	0.828405	2.29581	-0.193858	-0.389484	-1.01584	-0.275525	-0.627878	-0.0293666	AT5G49960.1		ion channel CASTOR-like isoform X1
Storvum009196t1	0.765398	1.25362	0.513199	0.387973	-0.465287	-0.528757	0.891708	-1.11966	-1.69819	AT3G47620.1	TEOSINTE BRANCHED, cycloidea and PCF (TCP) 14	transcription factor TCP14-like
Storvum009237t1	0.560255	0.507219	1.01945	0.264032	-1.27134	-0.961818	1.49141	-0.444513	-1.16471	AT5G61840.1	Exostosin family protein	probable beta-1,4-xylosyltransferase IRX10L
Storvum009239t1	1.26898	0.457313	0.581513	1.06795	-0.226377	-1.13543	0.329128	-0.667521	-1.67556	AT5G11680.1		NB-LRR tospovirus immune receptor
Storvum009323t1	0.884158	0.636389	0.712726	0.46649	-0.3383	-0.768566	1.20711	-1.34789	-1.45211	AT2G38320.1	TRICHOME BIREFRINGENCE-LIKE 34	protein trichome birefringence-like 34
Storvum009387t1	0.798314	0.993239	0.941214	1.04132	-0.202253	-1.02651	0.0262858	-1.24095	-1.33066	AT1G49380.1	cytochrome c biogenesis protein family	cytochrome c biogenesis protein CCS1, chloroplastic-like
Storvum009400t1	1.33827	0.247724	0.409099	0.0501409	-0.116427	-0.25213	1.21838	-1.11172	-1.78334	AT1G68130.1	indeterminate(ID)-domain 14	protein SHOOT GRAVITROPISM 5-like
Storvum009422t1	1.00963	0.103142	0.285876	1.04378	-1.14942	-1.43137	1.08919	0.153263	-1.10409	AT5G15050.1	Core-2/I-branching beta-1,6-N-acetylglucosaminyltransferase family protein	beta-glucuronosyltransferase GlcAT14B-like
Storvum009433t1	1.8076	0.497668	0.336489	0.596661	-0.879196	-0.656669	0.5074	-1.34172	-0.868234	AT5G03960.1	IQ-domain 12	protein IQ-DOMAIN 14-like
Storvum009457t1	1.28701	0.530188	-0.0627083	1.07003	-1.15311	-0.818483	1.04198	-0.818989	-1.07591	AT2G44380.1	Cysteine/Histidine-rich C1 domain family protein	eukaryotic translation initiation factor 5B-like
Storvum009515t1	1.24954	0.899868	0.583415	0.722157	-1.24031	-0.687056	0.521939	-0.586684	-1.46287	AT3G63140.1	chloroplast stem-loop binding protein of 41 kDa	chloroplast stem-loop binding protein of 41 kDa a, chloroplastic
Storvum009525t1	0.882437	1.3551	1.03225	0.262091	-0.95426	-0.35655	0.275173	-1.14393	-1.35231	AT5G03960.1	IQ-domain 12	protein IQ-DOMAIN 14-like
Storvum009580t1	1.061	0.829339	0.190937	1.07258	-0.36292	0.109808	0.201537	-1.59091	-1.51136	AT5G50120.1	Transducin/WD40 repeat-like superfamily protein	myosin heavy chain kinase B-like
Storvum009623t1	0.940093	1.09505	0.18117	0.169497	-1.32241	0.280929	1.06305	-1.20083	-1.20654	AT5G06800.1	myb-like HTH transcriptional regulator family protein	myb family transcription factor PHL5-like
Storvum009625t1	0.831238	1.31194	0.676866	0.497705	-0.681374	-1.46642	0.687099	-0.740252	-1.1168	AT1G77670.1	Pyridoxal phosphate (PLP)-dependent transferases superfamily protein	kynurenine--oxoglutarate transaminase-like
Storvum009668t1	0.916081	0.601424	1.02558	0.997716	-0.421658	-1.25912	0.418905	-0.810529	-1.4684	AT1G74210.1	PLC-like phosphodiesterases superfamily protein	glycerophosphodiester phosphodiesterase GDPD6
Storvum009671t1	0.992724	1.04095	0.994057	0.635011	-0.429552	-1.08832	0.200758	-0.737329	-1.60829	AT1G75710.1	C2H2-like zinc finger protein	Double zinc ribbon and ankyrin repeat-containing protein
Storvum009681t1	1.38098	0.455107	0.682629	0.928982	-0.7705	-0.445665	0.439361	-1.28739	-1.3835	AT3G01550.1	phosphoenolpyruvate (pep)/phosphate translocator 2	phosphoenolpyruvate/phosphate translocator 2, chloroplastic-like isoform X1
Storvum009706t1	0.552415	0.854206	1.33695	-0.225775	-0.983782	-1.40688	1.11673	-0.340032	-0.903826	AT1G67190.2	F-box/RNI-like superfamily protein	F-box/LRR-repeat protein At1g67190-like
Storvum009749t1	0.291889	1.71744	0.638578	0.750874	-1.37773	-0.695865	0.385239	-0.851435	-0.858991	AT3G51160.1	NAD(P)-binding Rossmann-fold superfamily protein	GDP-mannose 4,6 dehydratase 1
Storvum009782t1	0.384843	0.623345	1.25661	-0.476856	-1.02834	-1.06344	1.49984	-0.0961323	-1.09988	AT4G12730.1	FASCICLIN-like arabinogalactan 2	fasciclin-like arabinogalactan protein 2
Storvum009785t1	1.68551	1.48193	0.176212	-0.0324681	-1.00526	-0.282045	-0.150797	-0.757936	-1.11514	AT1G31350.1	KAR-UP F-box 1	F-box/kelch-repeat protein SKIP25-like
Storvum009786t1	1.32436	0.716171	-0.0476602	1.51152	-1.07306	-0.713	0.136707	-0.774064	-1.08098	AT5G07610.1	F-box family protein	F-box protein At5g07610-like
Storvum009793t1	0.806692	0.556763	1.23478	0.638912	-0.957307	-0.580761	0.787678	-0.978564	-1.50819	AT5G44680.1	DNA glycosylase superfamily protein	dual specificity protein kinase splA-like
Storvum009809t1	1.06346	0.952031	0.893335	0.852725	-0.561119	-0.561081	-0.00895035	-0.897926	-1.73248	AT5G23870.2	Pectinacetylesterase family protein	Pectin acetylesterase 9
Storvum009818t1	-0.0762042	0.203104	0.553781	1.38362	0.143932	-1.55229	0.965531	-0.0845548	-1.53692	AT2G43890.1	Pectin lyase-like superfamily protein	polygalacturonase-like
Storvum009858t1	1.57699	0.778852	0.448446	0.79192	-1.26802	-1.19468	0.257169	-0.624582	-0.766091	AT2G43870.1	Pectin lyase-like superfamily protein	polygalacturonase-like
Storvum009871t1	1.20192	0.620321	0.770004	1.14857	-0.196256	-0.919614	-0.164487	-0.830048	-1.63041	AT1G04360.1	RING/U-box superfamily protein	RING-H2 finger protein ATL16-like
Storvum009878t1	1.00257	0.246303	0.677772	1.65135	-0.514748	-0.754965	0.0930977	-1.09837	-1.303	AT3G07940.1	Calcium-dependent ARF-type GTPase activating protein family	probable ADP-ribosylation factor GTPase-activating protein AGD11
Storvum009890t1	0.107173	-0.1952	1.8534	-0.243253	-1.37355	-1.35914	0.793291	0.262814	0.154462	AT3G12120.2	fatty acid desaturase 2	delta(12)-fatty-acid desaturase FAD2-like
Storvum009908t1	1.16589	0.949311	0.910215	0.322273	-1.57555	-0.722963	0.579422	-0.549501	-1.0791	AT3G50760.1	galacturonosyltransferase-like 2	probable galacturonosyltransferase-like 1
Storvum009956t1	0.711489	0.218956	-0.130474	0.820534	-0.520034	-1.05654	1.78272	-0.40225	-1.42441	AT2G43890.1	Pectin lyase-like superfamily protein	polygalacturonase-like
Storvum009975t1	0.710604	0.797795	0.837241	1.03761	-0.670122	-0.0382152	0.185797	-0.92833	-1.93238	AT3G21330.1	basic helix-loop-helix (bHLH) DNA-binding superfamily protein	transcription factor bHLH87
Storvum010033t1	0.915791	1.00558	0.252427	1.26148	-1.1456	-0.430867	0.46921	-1.34712	-0.980898	AT3G21120.1	F-box and associated interaction domains-containing protein	F-box protein At3g07870-like
Storvum010066t1	1.24912	0.129063	-0.0390762	0.509829	0.202725	-0.40813	1.22387	-1.01833	-1.84907	AT3G61750.1	Cytochrome b561/ferric reductase transmembrane with DOMON related domain	cytochrome b561 and DOMON domain-containing protein At3g61750-like
Storvum010071t1	1.16509	0.503027	0.296965	1.224	-0.550528	-1.26139	0.629	-0.502601	-1.50357	AT1G03230.1	Eukaryotic aspartyl protease family protein	basic 7S globulin-like
Storvum010134t1	1.6219	0.676022	0.800178	0.576318	-0.540431	-0.528481	-0.102778	-0.915028	-1.5877	AT3G51470.1	Protein phosphatase 2C family protein	probable protein phosphatase 2C 47
Storvum010161t2	1.74107	0.39364	0.543494	0.833173	-0.572163	-0.549641	0.118246	-1.11957	-1.38826	AT2G06510.2	replication protein A 1A	replication protein A 70 kDa DNA-binding subunit B-like isoform X1
Storvum010169t1	1.60169	1.02032	-0.0523049	0.292112	0.0276001	-1.0167	0.487516	-0.828004	-1.53224	AT5G19790.1	related to AP2 11	Ethylene-responsive transcription factor RAP2-11
Storvum010177t1	1.22535	1.40648	0.620418	0.551342	-0.94123	-0.580854	0.000771373	-1.09773	-1.18454	AT5G16760.1	Inositol 1,3,4-trisphosphate 5/6-kinase family protein	inositol-tetrakisphosphate 1-kinase 1-like
Storvum010182t1	1.12818	0.890219	-0.0741804	1.0561	-0.965004	-1.32836	0.81524	-0.377083	-1.14512	AT2G42060.1	Cysteine/Histidine-rich C1 domain family protein	X-linked retinitis pigmentosa GTPase regulator-interacting protein 1-like
Storvum010230t1	1.11782	0.850159	0.602254	0.573453	-0.322069	-0.0368892	0.355149	-1.27372	-1.86616	AT1G75500.2	Walls Are Thin 1	protein WALLS ARE THIN 1-like
Storvum010300t1	0.818559	0.700516	1.25247	0.549608	-0.501118	-1.33999	0.572049	-0.531574	-1.52052	AT4G36930.1	basic helix-loop-helix (bHLH) DNA-binding superfamily protein	transcription factor SPATULA
Storvum010320t1	1.21885	1.00832	0.521765	1.06122	-1.17004	-1.08433	0.168775	-1.00181	-0.722758	AT5G02890.1	HXXXD-type acyl-transferase family protein	protein ECERIFERUM 1-like
Storvum010328t1	0.226484	1.25463	0.532482	-0.374697	-0.96048	-0.595378	1.67232	-0.467549	-1.28781	AT1G66810.1	Zinc finger C-x8-C-x5-C-x3-H type family protein	zinc finger CCCH domain-containing protein 14
Storvum010345t1	1.20713	0.374082	0.707236	0.89887	-0.739235	-1.14254	0.761914	-0.52129	-1.54617	AT3G52910.1	growth-regulating factor 4	growth-regulating factor 3-like
Storvum010361t1	1.33457	0.661297	0.239671	0.536806	0.134897	-0.463553	0.590771	-1.16372	-1.87074	AT1G77020.1	DNAJ heat shock N-terminal domain-containing protein	chaperone protein dnaJ 10
Storvum010382t1	0.0334025	0.177464	0.165958	1.94382	-1.07777	-1.06353	0.0324343	-1.06642	0.854644	AT2G33320.1	Calcium-dependent lipid-binding (CaLB domain) family protein	serine/threonine-protein kinase DDB_G0283821-like
Storvum010383t1	1.00027	0.520789	1.04547	0.551534	-0.364206	-0.274099	0.56181	-1.21905	-1.82251	AT1G79760.1	downstream target of AGL15-4	1-aminocyclopropane-1-carboxylate oxidase 3
Storvum010392t1	0.409182	1.80516	1.22285	0.20156	-0.930001	-0.868099	-0.190464	-0.929103	-0.721086	AT3G05200.1	RING/U-box superfamily protein	E3 ubiquitin-protein ligase ATL6-like
Storvum010403t1	0.620135	0.818125	1.15231	0.848018	0.15267	-1.13715	0.0305965	-0.744909	-1.7398	AT5G49610.1	F-box family protein	F-box protein At5g49610-like
Storvum010417t1	0.998252	0.90176	0.844969	1.00198	-0.895436	-1.04392	0.388495	-1.002	-1.1941	AT1G21880.2	lysm domain GPI-anchored protein 1 precursor	lysM domain-containing GPI-anchored protein 1-like
Storvum010431t1	-0.270245	-0.38185	-0.473181	1.72867	-1.40546	-0.277723	1.09729	0.801282	-0.81878	AT4G12840.2	Protein of unknown function (DUF707)	PREDICTED: uncharacterized protein LOC102586402 isoform X1
Storvum010433t3	1.09086	0.744512	1.21949	0.735791	-0.482251	-1.24117	0.023567	-0.679432	-1.41136	AT3G19430.1	late embryogenesis abundant protein-related / LEA protein-related	basic proline-rich protein-like
Storvum010535t1	1.6451	0.630562	0.439561	0.707323	-0.536009	-0.736895	0.357868	-1.02977	-1.47774	AT1G10070.2	branched-chain amino acid transaminase 2	branched-chain-amino-acid aminotransferase 2, chloroplastic-like
Storvum010624t1	0.85558	0.840885	1.26215	0.950183	-0.815771	-0.856685	0.00766872	-0.850181	-1.39383	AT5G11420.1	Protein of unknown function, DUF642	uncharacterized protein LOC101250580
Storvum010638t1	1.35372	1.02867	0.673553	0.520804	-1.10618	-1.03765	0.483898	-0.878503	-1.03831	AT3G51240.1	flavanone 3-hydroxylase	flavanone 3-hydroxylase
Storvum010644t1	0.666744	1.30285	-0.00956433	0.161276	-1.2828	-0.295946	1.42207	-0.711548	-1.25307	AT3G48690.1	alpha/beta-Hydrolases superfamily protein	probable carboxylesterase 12
Storvum010673t1	1.80218	0.433804	0.201403	1.02609	-1.076	-0.973905	0.205178	-0.886731	-0.73203	AT1G29050.1	TRICHOME BIREFRINGENCE-LIKE 38	protein trichome birefringence-like 41
Storvum010682t1	-0.324639	-0.524711	-0.207116	1.14157	-0.0176	0.149215	1.95258	-1.29097	-0.878332	AT2G46495.1	RING/U-box superfamily protein	putative RING-H2 finger protein ATL21A
Storvum010693t1	0.939716	0.924572	1.15525	0.632043	-0.474796	-0.855384	0.236167	-0.929092	-1.62847	AT3G06240.1	F-box family protein	F-box/kelch-repeat protein At3g23880-like
Storvum010767t1	1.04813	1.0937	0.705616	0.304539	-0.893442	-0.587064	0.839641	-1.01695	-1.49417	AT5G58360.1	ovate family protein 3	transcription repressor OFP4-like
Storvum010807t1	0.575102	0.514787	1.52703	-0.240245	-1.67922	-1.052	0.870609	0.0559019	-0.571967	AT1G05577.1	Domain of unknown function (DUF966)	protein UPSTREAM OF FLC
Storvum010835t1	0.92176	0.315861	0.977973	0.651739	-1.63816	-1.28672	0.958465	-0.503781	-0.397131	AT3G20820.1	Leucine-rich repeat (LRR) family protein	DNA-damage-repair/toleration protein DRT100-like
Storvum010876t1	0.765075	0.209333	0.935583	0.805816	-1.29498	-0.352134	0.724917	0.080741	-1.87435	AT2G37590.1	DNA binding with one finger 2.4	dof zinc finger protein DOF2.4-like
Storvum010939t1	1.41167	1.00531	0.670695	0.292103	-1.01724	-1.33247	0.535715	-0.519937	-1.04585	AT5G23730.1	Transducin/WD40 repeat-like superfamily protein	WD repeat-containing protein RUP2-like
Storvum010972t1	0.792578	0.949707	0.714197	1.3539	-0.407728	-1.62625	-0.445998	-0.324675	-1.00573	AT5G58770.1	Undecaprenyl pyrophosphate synthetase family protein	dehydrodolichyl diphosphate synthase 2-like
Storvum010990t1	0.859037	0.92341	0.812165	0.491566	-0.808546	-0.95642	1.04544	-1.03142	-1.33524	AT2G37090.1	Nucleotide-diphospho-sugar transferases superfamily protein	probable beta-1,4-xylosyltransferase IRX9
Storvum011016t1	0.322739	1.0361	1.39927	0.617043	-0.431312	-1.16915	0.377025	-0.589242	-1.56247	AT4G23160.1	cysteine-rich RLK (RECEPTOR-like protein kinase) 8	putative ribonuclease H-like domain-containing protein
Storvum011103t1	0.946439	0.396753	1.80747	0.413487	-0.135168	-0.48253	-0.562235	-0.969102	-1.41511	AT4G35160.1	O-methyltransferase family protein	trans-resveratrol di-O-methyltransferase-like
Storvum011105t1	1.13637	1.06668	0.553889	0.661679	-1.06563	0.244111	0.0853792	-1.22727	-1.45521	AT1G77920.1	bZIP transcription factor family protein	transcription factor TGA1-like
Storvum011155t1	-0.369863	-0.0190058	0.275493	0.630203	0.370559	-1.48558	1.19426	1.01377	-1.60983	AT1G68040.1	S-adenosyl-L-methionine-dependent methyltransferases superfamily protein	probable S-adenosylmethionine-dependent methyltransferase At5g38100
Storvum011156t1	0.646912	0.697778	0.463797	1.22715	-1.09377	-0.676175	1.03491	-1.11409	-1.18651	AT1G29670.1	GDSL-like Lipase/Acylhydrolase superfamily protein	GDSL esterase/lipase At1g29670-like
Storvum011171t1	0.993081	0.4607	1.67466	0.100609	-1.10301	-1.34485	0.36064	-0.27113	-0.870703	AT4G08150.1	KNOTTED-like from Arabidopsis thaliana	homeotic protein knotted-1
Storvum011222t1	0.588616	0.164684	0.9077	1.26833	-1.00889	-1.18933	0.874818	-0.208543	-1.39738	AT1G68640.1	bZIP transcription factor family protein	transcription factor HBP-1b(c38)-like
Storvum011258t1	0.723025	0.58478	1.08149	1.20734	-0.348801	-1.53897	0.043103	-0.385419	-1.36656	AT1G17020.1	senescence-related gene 1	protein SRG1-like
Storvum011260t1	1.4399	0.674747	0.480259	0.464308	0.0243459	-0.447415	0.309434	-1.03096	-1.91462	AT4G30850.2	heptahelical transmembrane protein2	heptahelical transmembrane protein 2-like
Storvum011266t1	0.743976	0.846658	0.415744	0.670087	-0.328482	0.0279747	0.810576	-1.22919	-1.95734	AT5G57770.1	Plant protein of unknown function (DUF828) with plant pleckstrin homology-like region	VAN3-binding protein
Storvum011305t1	1.37871	0.058556	0.643153	0.298872	-0.10699	-0.106332	0.842596	-1.09543	-1.91313	AT3G18200.1	nodulin MtN21 /EamA-like transporter family protein	WAT1-related protein At3g18200
Storvum011314t1	0.195939	-0.088892	2.05028	0.870653	-0.231962	-0.773205	-0.0331963	-0.570551	-1.41906	AT5G66430.1	S-adenosyl-L-methionine-dependent methyltransferases superfamily protein	benzoate carboxyl methyltransferase-like
Storvum011334t1	1.23936	0.620979	0.524381	0.770167	-0.276573	-1.23932	0.715342	-0.780509	-1.57382	AT1G32240.1	Homeodomain-like superfamily protein	probable transcription factor KAN2 isoform X2
Storvum011382t1	0.199284	0.551627	1.41554	0.110476	-1.22876	-1.03568	1.41462	-0.575485	-0.851614	AT2G28315.1	Nucleotide/sugar transporter family protein	uncharacterized membrane protein At1g06890-like
Storvum011422t1	0.580737	0.209865	1.73952	0.561664	-0.184877	-0.798065	0.382542	-0.823565	-1.66782	AT4G39330.1	cinnamyl alcohol dehydrogenase 9	probable cinnamyl alcohol dehydrogenase 6
Storvum011459t1	1.00512	0.828616	0.590229	0.983726	-0.797752	-0.822394	0.589945	-0.688719	-1.68877	AT5G25830.1	GATA transcription factor 12	GATA transcription factor 12-like
Storvum011462t1	1.35408	0.773308	0.700201	0.513598	-0.725117	-0.584847	0.631859	-1.35713	-1.30595	AT4G17220.1	microtubule-associated proteins 70-5	microtubule-associated protein 70-5-like
Storvum011469t1	1.025	1.1543	0.488272	1.1103	-0.347186	-0.833718	-0.146009	-0.834807	-1.61615	AT2G34060.1	Peroxidase superfamily protein	peroxidase 19
Storvum011526t1	0.897974	0.548397	0.290178	1.18815	-0.655052	-1.33635	0.861353	-0.253212	-1.54144	AT5G15650.1	reversibly glycosylated polypeptide 2	alpha-1,4-glucan-protein synthase [UDP-forming] 1-like
Storvum011530t1	1.11309	0.974101	0.581358	1.00888	-0.892223	-1.28449	0.355611	-0.644492	-1.21184	AT1G28220.1	purine permease 3	purine permease 3-like
Storvum011548t1	1.07133	1.07176	0.918312	0.668546	-0.695508	-0.723766	0.236165	-1.04236	-1.50448	AT3G44510.2	alpha/beta-Hydrolases superfamily protein	probable lysophospholipase BODYGUARD 1
Storvum011563t2	1.46709	0.914976	0.701255	0.458103	-0.919459	-0.522537	0.370374	-1.27536	-1.19444	AT1G33800.1	Protein of unknown function (DUF579)	glucuronoxylan 4-O-methyltransferase 3
Storvum011564t1	1.03735	0.776342	1.01672	0.788659	-0.929876	-1.19009	0.487264	-0.698012	-1.28836	AT3G08900.1	reversibly glycosylated polypeptide 3	alpha-1,4-glucan-protein synthase [UDP-forming]-like
Storvum011575t1	1.00161	0.79213	0.883493	0.640305	-0.500469	-0.711593	0.643448	-1.03565	-1.71328	AT1G78110.1		kinesin-related protein 4-like
Storvum011597t1	1.31653	1.39442	0.892007	0.412596	-0.888541	-0.661786	-0.589102	-1.04303	-0.83309	AT4G33870.1	Peroxidase superfamily protein	putative Peroxidase 48
Storvum011613t1	0.71942	0.555838	0.901899	1.20971	-0.206402	-1.34742	0.260599	-0.422749	-1.67089	AT3G02230.1	reversibly glycosylated polypeptide 1	alpha-1,4-glucan-protein synthase [UDP-forming] 1-like
Storvum011636t1	0.22754	0.96947	1.53193	0.477763	-0.802533	-0.924655	0.672254	-0.786702	-1.36507	AT1G49390.1	2-oxoglutarate (2OG) and Fe(II)-dependent oxygenase superfamily protein	protein SRG1-like
Storvum011650t1	0.169697	0.971904	1.24779	0.35857	-1.09685	-0.661276	1.16749	-1.00573	-1.1516	AT5G19530.1	S-adenosyl-L-methionine-dependent methyltransferases superfamily protein	thermospermine synthase ACAULIS5-like
Storvum011729t1	0.182869	0.61318	-0.0434452	0.0357413	-0.0392114	-1.67901	1.46277	0.84825	-1.38114	AT1G28710.3	Nucleotide-diphospho-sugar transferase family protein	pentatricopeptide repeat-containing protein, putative
Storvum011765t1	0.376554	0.572453	0.482816	0.19874	-0.213308	-0.854747	1.87371	-1.17678	-1.25945	AT5G06710.1	homeobox from Arabidopsis thaliana	Homeobox-leucine zipper protein HAT14
Storvum011771t1	0.756764	1.04593	1.14838	0.807293	-0.463642	-0.549224	-0.0913793	-0.929747	-1.72437	AT1G73620.1	Pathogenesis-related thaumatin superfamily protein	thaumatin-like protein
Storvum011799t1	0.782972	0.314335	0.844968	1.47509	-0.671013	-1.45372	0.195336	-0.15681	-1.33116	AT4G18910.1	NOD26-like intrinsic protein 1;2	nodulin-26-like
Storvum011807t2	1.30957	0.656999	0.528834	1.17503	-0.292507	-0.609312	-0.103967	-1.03634	-1.62831	AT4G03210.1	xyloglucan endotransglucosylase/hydrolase 9	xyloglucan endotransglucosylase/hydrolase protein 9-like
Storvum011820t1	2.04112	0.380056	0.654455	0.241032	-0.745286	-0.150128	-0.261347	-0.745227	-1.41468	AT1G61260.1	Protein of unknown function (DUF761)	PREDICTED: uncharacterized protein LOC107866577
Storvum011851t1	0.38281	0.78911	1.61975	0.556672	-0.809055	-0.449599	0.411046	-0.981313	-1.51942	AT1G49390.1	2-oxoglutarate (2OG) and Fe(II)-dependent oxygenase superfamily protein	protein SRG1-like
Storvum011854t1	1.07353	1.49876	0.860644	0.36584	-1.07832	-0.987502	-0.0572583	-0.536594	-1.1391	AT2G42040.1		DNA-directed RNA polymerase II subunit RPB1-like isoform X1
Storvum011951t1	0.0628901	0.402539	0.389452	0.989447	-0.791264	-0.543298	1.75424	-0.865687	-1.39832	AT5G51910.2	TCP family transcription factor	transcription factor TCP19
Storvum011953t1	1.62905	0.760248	0.29559	0.765911	-0.611634	-1.39344	0.295708	-0.575145	-1.16629	AT2G43480.1	Peroxidase superfamily protein	probable peroxidase 61
Storvum012002t1	0.82778	1.18114	0.859826	1.00102	-0.807549	-1.48333	-0.0149194	-0.55535	-1.00862	AT5G60520.1	Late embryogenesis abundant (LEA) protein-related	Root_cap domain-containing protein
Storvum012060t1	0.742214	1.24567	1.07174	0.820951	-0.6258	-0.977408	-0.130926	-0.622022	-1.52442	AT5G50740.1	Heavy metal transport/detoxification superfamily protein	heavy metal-associated isoprenylated plant protein 3-like
Storvum012101t1	1.12004	-0.624604	1.49699	0.769072	-1.1153	-0.794494	0.683958	-0.788631	-0.747041	AT3G57670.1	C2H2-type zinc finger family protein	zinc finger protein WIP2
Storvum012126t1	0.859648	0.540878	1.56822	0.554143	-0.251339	-0.945206	0.162413	-0.997242	-1.49151	AT3G13960.1	growth-regulating factor 5	growth-regulating factor 1-like
Storvum012144t1	0.83423	-0.347148	1.26151	1.1066	-0.918281	-1.19214	0.404805	0.224747	-1.37433	AT5G17600.1	RING/U-box superfamily protein	E3 ubiquitin-protein ligase Os04g0590900-like
Storvum012191t1	0.800518	1.05298	0.360773	0.748897	-0.222688	0.0387027	0.379997	-1.14732	-2.01185	AT5G16760.1	Inositol 1,3,4-trisphosphate 5/6-kinase family protein	inositol-tetrakisphosphate 1-kinase 1-like
Storvum012200t1	1.26131	-0.0837256	-0.403746	1.26728	-1.41868	-1.42966	0.717144	0.215531	-0.125447	AT1G23380.1	KNOTTED1-like homeobox gene 6	homeobox protein knotted-1-like 6
Storvum012210t1	0.908633	1.1334	0.843619	0.499894	-1.13899	-0.207125	0.525533	-1.17692	-1.38804	AT4G00430.1	plasma membrane intrinsic protein 1;4	probable aquaporin PIP-type pTOM75
Storvum012233t1	0.239127	0.348369	0.328637	0.923747	-1.19295	-1.40901	1.67242	-0.108507	-0.801836	AT2G01820.1	Leucine-rich repeat protein kinase family protein	serine/threonine protein kinase
Storvum012267t5	1.27448	0.959057	0.558453	0.947844	-0.380805	-1.07929	0.0336795	-0.797083	-1.51634	AT3G01190.1	Peroxidase superfamily protein	peroxidase 27-like
Storvum012294t1	1.46521	-0.166016	0.273584	1.4448	-0.940755	-0.476885	0.506466	-0.858441	-1.24797	AT4G24180.1	THAUMATIN-LIKE PROTEIN 1	pathogenesis-related protein 5
Storvum012320t1	1.43551	0.651256	0.978834	0.799701	-0.809771	-0.81781	-0.0288277	-0.82825	-1.38064	AT4G35690.1	Arabidopsis protein of unknown function (DUF241)	uncharacterized protein LOC101267386
Storvum012327t1	0.534542	1.06864	1.17853	0.166014	0.115042	-0.969079	0.237087	-0.319523	-2.01125	AT3G01280.1	voltage dependent anion channel 1	protamine P1 family protein
Storvum012375t1	0.712352	0.751923	0.796789	0.691823	-0.997007	-0.944485	1.2029	-0.986533	-1.22776	AT5G61340.1		PREDICTED: uncharacterized protein LOC107060149
Storvum012381t1	0.812152	0.807722	1.22142	0.410808	-0.915094	-0.310787	0.651681	-1.13512	-1.54279	AT5G06860.1	polygalacturonase inhibiting protein 1	Polygalacturonase inhibitor
Storvum012440t2	0.492811	1.12166	1.60076	0.119133	-0.754325	-0.778705	0.251204	-0.488947	-1.56359	AT5G08640.2	flavonol synthase 1	flavonol synthase/flavanone 3-hydroxylase-like
Storvum012476t5	0.993137	0.864509	0.690641	1.31571	-1.07586	-0.880271	0.139945	-0.954916	-1.0929	AT5G09810.1	actin 7	actin-75
Storvum012497t1	0.823056	1.02271	0.596247	0.836461	0.225596	-1.25192	0.307518	-0.938703	-1.62096	AT3G15030.3	TCP family transcription factor 4	transcription factor TCP3-like
Storvum012540t1	0.415237	1.10516	0.920976	-0.00744443	-1.03422	-0.926374	1.38992	-0.646642	-1.21662	AT1G05260.1	Peroxidase superfamily protein	peroxidase 3-like
Storvum012549t1	0.521119	1.06013	0.956675	0.163437	-1.07049	-1.0771	1.25403	-0.630199	-1.17762	AT1G05260.1	Peroxidase superfamily protein	peroxidase 3-like
Storvum012607t1	0.720137	1.13195	0.661956	0.264868	-1.24919	-0.755313	1.2387	-1.0131	-1.00001	AT1G05260.1	Peroxidase superfamily protein	peroxidase 3-like
Storvum012627t1	1.19242	0.848366	1.17924	0.346465	-1.44034	-0.258961	0.211791	-1.04917	-1.02981	AT5G60850.1	OBF binding protein 4	dof zinc finger protein DOF5.4
Storvum012641t1	1.22499	1.12775	0.519616	1.02039	-1.06901	-0.982536	0.0377065	-0.795193	-1.08373	AT4G30170.1	Peroxidase family protein	peroxidase 16-like
Storvum012710t1	0.163032	1.13729	0.646593	1.44469	-0.754575	-1.75826	-0.34668	0.0890521	-0.621139	AT5G25930.1	Protein kinase family protein with leucine-rich repeat domain	receptor-like protein kinase HSL1
Storvum012713t1	1.14022	0.993812	0.883231	0.243957	-0.558098	-0.110986	0.376479	-1.50404	-1.46457	AT1G11915.1		LEAF RUST 10 DISEASE-RESISTANCE LOCUS RECEPTOR-LIKE PROTEIN KINASE-like 2.7
Storvum012714t1	1.49221	0.825986	0.879139	0.269608	-1.1003	-0.274467	0.296983	-1.10169	-1.28747	AT4G33420.1	Peroxidase superfamily protein	Peroxidase 47
Storvum012721t1	1.04263	0.43903	-0.05513	0.685575	-1.1959	-1.13565	1.56819	-0.392873	-0.955865	AT5G04200.1	metacaspase 9	metacaspase-9
Storvum012734t1	1.11541	0.822631	0.637178	0.902424	-0.473118	-0.660691	0.414665	-1.04622	-1.71228	AT4G22900.1	Protein of unknown function (DUF1191)	Dihydrolipoyllysine-residue succinyltransferase component of 2-oxoglutarate dehydrogenase
Storvum012780t1	1.40111	0.787805	0.505683	0.965971	-1.07013	-0.868265	0.360409	-0.919029	-1.16356	AT3G01190.1	Peroxidase superfamily protein	peroxidase 27-like
Storvum012839t1	0.803849	0.562466	0.973907	0.924357	-0.111332	-0.993513	0.511338	-0.884821	-1.78625	AT2G37390.2	Chloroplast-targeted copper chaperone protein	protein SODIUM POTASSIUM ROOT DEFECTIVE 2-like
Storvum012840t1	1.11023	1.0426	0.831743	0.659501	-0.902319	-0.936383	0.48384	-1.08031	-1.20891	AT2G37540.1	NAD(P)-binding Rossmann-fold superfamily protein	short-chain dehydrogenase TIC 32, chloroplastic
Storvum012884t1	1.53586	0.434374	0.586439	1.16758	-0.680604	-0.67167	-0.0140729	-1.01949	-1.33842	AT3G08600.1	Protein of unknown function (DUF1191)	PREDICTED: uncharacterized protein LOC107872957 isoform X1
Storvum012895t1	1.34129	0.555805	0.586834	0.812093	-0.779711	-0.87438	0.744336	-0.953849	-1.43241	AT1G14700.1	purple acid phosphatase 3	purple acid phosphatase 3-like
Storvum012933t1	0.896903	1.28101	1.12537	0.116888	-0.617835	-0.392814	0.267339	-1.13332	-1.54354	AT2G46890.1	Protein of unknown function (DUF1295)	PREDICTED: uncharacterized protein C594.04c-like
Storvum012944t1	0.949338	0.448069	1.0938	1.02971	-0.28619	-1.2203	0.107812	-0.426007	-1.69622	AT1G13420.1	sulfotransferase 4B	cytosolic sulfotransferase 5-like
Storvum012984t2	0.880547	0.871422	0.417861	0.440428	-0.730959	-0.387389	1.25323	-1.18043	-1.56471	AT5G42180.1	Peroxidase superfamily protein	peroxidase 64-like
Storvum012985t1	1.28099	1.84157	0.0344766	0.0256345	-0.887672	-0.786038	0.218829	-0.765082	-0.962704	AT2G14760.1	basic helix-loop-helix (bHLH) DNA-binding superfamily protein	transcription factor bHLH84-like
Storvum013050t1	0.539664	1.04187	0.398844	0.441393	-0.61755	0.14797	1.09474	-1.41001	-1.63692	AT5G42180.1	Peroxidase superfamily protein	peroxidase 64-like
Storvum013114t1	1.67605	0.972953	-0.191047	0.55216	-1.48708	-0.637172	0.319574	-1.08062	-0.124826	AT4G38690.1	PLC-like phosphodiesterases superfamily protein	PI-PLC X-box domain-containing protein DDB_G0293730-like
Storvum013173t1	-0.1735	-0.587853	1.58392	0.193943	0.0265263	-0.460934	1.45835	-0.447416	-1.59304	AT4G35720.1	Arabidopsis protein of unknown function (DUF241)	uncharacterized protein LOC101250469
Storvum013189t1	0.600709	0.92973	0.865798	1.56429	-1.25091	-0.650277	-0.387492	-0.982227	-0.689623	AT3G48420.1	Haloacid dehalogenase-like hydrolase (HAD) superfamily protein	haloacid dehalogenase-like hydrolase domain-containing protein At3g48420
Storvum013221t1	0.419799	1.21116	1.51637	0.421225	-0.633919	-0.142217	-0.227587	-1.52425	-1.04059	AT5G62420.1	NAD(P)-linked oxidoreductase superfamily protein	aldo-keto reductase family 4 member C9-like
Storvum013230t1	1.10987	1.0676	1.01788	0.457766	-0.720618	-0.707239	0.280881	-0.984734	-1.52141	AT1G77330.1	2-oxoglutarate (2OG) and Fe(II)-dependent oxygenase superfamily protein	1-aminocyclopropane-1-carboxylate oxidase 5
Storvum013235t1	1.0364	0.695207	-0.274982	0.500793	0.255273	0.21767	0.624524	-0.839187	-2.2157	AT1G02170.1	metacaspase 1	metacaspase-1-like
Storvum013268t1	1.13388	0.730787	1.13187	0.460412	-0.830589	-0.00843308	0.183027	-1.54366	-1.2573	AT3G11180.2	2-oxoglutarate (2OG) and Fe(II)-dependent oxygenase superfamily protein	flavonol synthase/flavanone 3-hydroxylase-like
Storvum013269t1	1.10074	0.761825	0.786743	1.03191	-0.842016	-0.980959	0.405501	-0.880641	-1.3831	AT1G76240.1	Arabidopsis protein of unknown function (DUF241)	GRIP domain-containing protein
Storvum013425t1	1.29822	0.591034	0.444691	1.17895	-0.91257	-0.644337	0.435355	-0.994567	-1.39678	AT5G44130.1	FASCICLIN-like arabinogalactan protein 13 precursor	Fasciclin-like arabinogalactan protein 9
Storvum013438t1	-0.817859	0.276902	1.9659	0.730567	0.376124	-0.863353	0.185572	-1.25577	-0.598076	AT5G46060.1	Protein of unknown function, DUF599	PREDICTED: uncharacterized protein LOC107010482
Storvum013449t1	0.530646	0.932363	0.827533	1.40331	-1.275	-0.753409	0.292112	-0.993763	-0.963784	AT2G35600.1	BREVIS RADIX-like 1	protein BREVIS RADIX-like
Storvum013464t1	1.42513	0.853095	0.640579	0.894267	-0.801378	-0.872266	0.142435	-1.0941	-1.18777	AT1G69780.1	Homeobox-leucine zipper protein family	homeobox-leucine zipper protein ATHB-13-like
Storvum013471t1	0.630305	0.742059	1.47469	0.984804	-0.807346	-1.0734	-0.250889	-0.304587	-1.39564	AT5G66870.1	ASYMMETRIC LEAVES 2-like 1	LOB domain-containing protein 36-like
Storvum013476t1	1.03392	0.696523	0.22981	-0.545446	-1.3592	-1.66799	0.593892	-0.0360031	1.05449	AT5G57620.1	myb domain protein 36	transcription factor RAX2-like
Storvum013501t1	1.32535	0.451243	1.44257	0.524604	-0.238852	-0.804378	-0.34709	-0.964921	-1.38852	AT3G57670.1	C2H2-type zinc finger family protein	zinc finger protein WIP2-like
Storvum013519t1	0.28637	1.15763	0.587276	0.339527	-1.19875	-0.877303	1.50814	-0.976926	-0.825954	AT5G67210.1	Protein of unknown function (DUF579)	protein IRX15-LIKE-like
Storvum013536t1	1.88099	0.67729	0.357842	0.780064	-0.877133	-1.01964	-0.141712	-0.650672	-1.00704	AT3G17840.1	receptor-like kinase 902	probable inactive receptor kinase RLK902
Storvum013537t1	0.736881	0.676245	1.81667	0.200806	-0.532048	-1.33164	0.199389	-0.92228	-0.844021	AT3G52440.1	Dof-type zinc finger DNA-binding family protein	dof zinc finger protein DOF3.5-like
Storvum013563t1	1.47935	0.641758	1.00346	0.631248	-0.700139	-1.26275	0.108964	-0.739879	-1.16201	AT5G62610.1	basic helix-loop-helix (bHLH) DNA-binding superfamily protein	Transcription factor bHLH79
Storvum013663t1	0.57142	0.69857	0.945443	1.09925	-0.30622	-1.2434	0.41848	-0.426786	-1.75675	AT1G18590.1	sulfotransferase 17	cytosolic sulfotransferase 5-like
Storvum013678t1	1.31779	0.863353	0.571041	0.795559	-0.652408	-0.850384	0.477236	-1.23111	-1.29108	AT5G01450.1	RING/U-box superfamily protein	E3 ubiquitin-protein like
Storvum013694t1	1.05229	1.09043	0.580159	0.823492	-1.06482	-0.311323	0.393958	-1.1943	-1.36989	AT2G37170.1	plasma membrane intrinsic protein 2	aquaporin PIP2-4-like
Storvum013726t1	1.00187	1.66142	0.297832	-0.390586	-0.963975	-0.875084	0.894817	-0.516045	-1.11025	AT3G48740.1	Nodulin MtN3 family protein	bidirectional sugar transporter SWEET12-like
Storvum013752t1	0.504135	0.913703	1.29724	0.624071	0.314538	-0.717067	-0.18099	-0.932791	-1.82284	AT2G17080.1	Arabidopsis protein of unknown function (DUF241)	Receptor-type tyrosine-protein like
Storvum013759t1	1.01149	1.15167	0.499147	0.586867	-1.0483	-0.245627	0.6527	-1.11553	-1.49241	AT1G10380.1	Putative membrane lipoprotein	wall-associated receptor kinase-like 15
Storvum013800t1	1.33787	0.80566	0.554032	0.92205	-0.801357	-1.07882	0.394672	-0.779909	-1.35419	AT3G58120.1	Basic-leucine zipper (bZIP) transcription factor family protein	basic leucine zipper 61-like
Storvum013803t1	0.823957	1.38176	1.05062	0.31053	-0.35836	-0.0619294	-0.498071	-0.921786	-1.72672	AT5G24580.2	Heavy metal transport/detoxification superfamily protein	heavy metal-associated isoprenylated plant protein 9-like
Storvum013806t1	1.40348	0.771961	0.551745	0.951132	-0.948995	-0.862193	0.346962	-1.03709	-1.177	AT3G58120.1	Basic-leucine zipper (bZIP) transcription factor family protein	basic leucine zipper 61-like
Storvum013817t1	1.15008	0.665421	0.960611	1.03234	-0.0604579	-0.976767	-0.394731	-0.795431	-1.58107	AT5G13870.1	xyloglucan endotransglucosylase/hydrolase 5	probable xyloglucan endotransglucosylase/hydrolase protein B
Storvum013965t1	0.651085	1.11791	1.0699	0.690245	-0.993938	-0.695671	0.529309	-0.912814	-1.45602	AT5G10750.1	Protein of unknown function (DUF1336)	protein ENHANCED DISEASE RESISTANCE 2-like
Storvum013990t1	0.150214	0.630964	1.73876	0.0611057	-1.14419	-0.85874	0.474634	0.402675	-1.45543	AT5G25310.1	Exostosin family protein	probable glycosyltransferase At5g25310
Storvum013999t1	1.38669	0.677935	0.898581	0.85944	-1.17929	-0.668012	0.123709	-0.959749	-1.1393	AT1G69780.1	Homeobox-leucine zipper protein family	homeobox-leucine zipper protein HAT7-like isoform X1
Storvum014021t1	0.540323	0.848496	0.555702	1.60436	-0.589759	-1.15089	0.131095	-0.452334	-1.487	AT2G37730.1	Protein of unknown function (DUF604)	PREDICTED: uncharacterized protein LOC109230627
Storvum014067t1	1.24087	0.80661	0.610054	0.85933	-1.04945	-0.459569	0.481285	-1.07583	-1.4133	AT1G78260.1	RNA-binding (RRM/RBD/RNP motifs) family protein	RNA-binding protein 38-like
Storvum014201t1	1.34507	0.958622	0.541762	0.611551	0.206836	-0.539951	-0.227088	-1.34185	-1.55495	AT4G31690.1	Transcriptional factor B3 family protein	B3 domain-containing protein REM10-like isoform X2
Storvum014217t1	1.77913	1.20174	0.614931	-0.583768	-0.171204	-1.11093	-0.0549799	-0.802691	-0.872227	AT4G03480.1	Ankyrin repeat family protein	trypsin-like peptidase domain protein
Storvum014230t1	0.219662	1.09919	1.01238	0.634745	-0.742263	-0.337282	0.729422	-0.717348	-1.89851	AT3G60390.1	homeobox-leucine zipper protein 3	homeobox-leucine zipper protein HAT3-like
Storvum014258t4	0.231338	0.536452	2.20795	-0.526066	-0.882516	-0.728628	0.518429	-0.74079	-0.616163	AT5G48850.1	Tetratricopeptide repeat (TPR)-like superfamily protein	protein SULFUR DEFICIENCY-INDUCED 1-like
Storvum014293t1	1.26673	0.846588	0.471408	1.02304	-1.33104	-0.877135	0.423765	-1.02771	-0.795646	AT3G23730.1	xyloglucan endotransglucosylase/hydrolase 16	probable xyloglucan endotransglucosylase/hydrolase protein 16
Storvum014300t1	0.905913	0.502812	1.26521	0.349912	-0.854457	-1.12284	0.92068	-0.52005	-1.44718	AT3G02150.1	plastid transcription factor 1	transcription factor TCP13-like
Storvum014301t1	1.19578	1.44059	-0.0812782	0.974469	-1.44297	-0.435308	-0.0704895	-0.869468	-0.711329	AT1G24480.1	S-adenosyl-L-methionine-dependent methyltransferases superfamily protein	Sterol 24-C-methyltransferase
Storvum014312t1	0.992858	0.743604	0.517863	1.1637	-0.965076	-0.628822	0.62363	-0.971442	-1.47631	AT1G27930.1	Protein of unknown function (DUF579)	probable methyltransferase At1g27930
Storvum014316t1	0.359105	0.0157572	2.065	0.540067	0.15783	-1.18088	-0.221691	-0.454739	-1.28045	AT2G23610.1	methyl esterase 3	salicylic acid-binding protein 2-like
Storvum014336t1	1.47332	1.08645	0.60619	0.267475	-1.47518	0.0198337	0.0124643	-0.833856	-1.15669	AT1G54780.1	thylakoid lumen 18.3 kDa protein	UPF0603 protein At1g54780, chloroplastic
Storvum014351t1	1.69909	-0.355454	1.06289	0.893018	-1.20103	-0.8275	-0.133927	-0.202589	-0.934504	AT4G09040.1	RNA-binding (RRM/RBD/RNP motifs) family protein	28 kDa ribonucleoprotein, chloroplastic
Storvum014375t2	0.968246	0.619513	0.778506	1.13234	0.174425	-1.18545	-0.212583	-0.536786	-1.73821	AT1G11545.1	xyloglucan endotransglucosylase/hydrolase 8	probable xyloglucan endotransglucosylase/hydrolase protein 8
Storvum014382t1	0.201325	0.815169	1.05375	1.11988	0.0668985	-1.37137	0.380877	-0.726033	-1.54049	AT5G04820.1	ovate family protein 13	transcription repressor OFP15
Storvum014437t1	0.996995	0.856325	0.764534	0.745967	-1.40773	-0.167654	0.574422	-1.19566	-1.1672	AT4G00430.1	plasma membrane intrinsic protein 1;4	probable aquaporin PIP-type pTOM75
Storvum014443t1	1.94249	-0.224953	-0.0651235	0.686985	-0.511817	-0.402643	0.836315	-1.03106	-1.23019	AT2G41660.1	Protein of unknown function, DUF617	protein MIZU-KUSSEI 1-like
Storvum014486t1	1.29328	0.601307	0.245673	0.776309	-1.2183	-0.384757	0.994955	-1.24395	-1.06452	AT4G17460.1	Homeobox-leucine zipper protein 4 (HB-4) / HD-ZIP protein	homeobox-leucine zipper protein HAT4-like
Storvum014517t1	1.09319	1.17048	0.869764	-0.410376	-1.5517	-0.218852	0.614994	-1.25682	-0.310679	AT3G08940.2	light harvesting complex photosystem II	chlorophyll a-b binding protein CP29.1, chloroplastic
Storvum014524t1	0.408014	0.359172	1.64967	0.07843	-1.38045	-1.07804	1.07564	-0.297974	-0.814461	AT2G42040.1		uncharacterized protein LOC104645889 isoform X1
Storvum014531t1	1.01845	2.14367	0.214909	-0.528738	-1.06736	-0.6117	-0.206128	-0.376656	-0.586438	AT5G50790.1	Nodulin MtN3 family protein	bidirectional sugar transporter SWEET12-like
Storvum014541t1	1.3712	0.539756	0.15486	1.38962	-1.07241	-0.631647	-0.161691	-1.51412	-0.0755694	AT2G23610.1	methyl esterase 3	salicylic acid-binding protein 2-like
Storvum014561t1	0.91889	0.90332	0.316813	1.28559	-0.93045	-0.884321	0.460816	-0.495607	-1.57505	AT1G51700.1	DOF zinc finger protein 1	dof zinc finger protein DOF2.2-like
Storvum014592t1	1.18002	0.636241	0.564596	0.974855	-0.963364	-0.388928	0.627097	-1.29014	-1.34037	AT4G35100.2	plasma membrane intrinsic protein 3	aquaporin PIP2-7-like
Storvum014600t1	0.143539	0.656717	0.177602	1.32792	-0.748245	-0.399294	1.17174	-0.477063	-1.85292	AT1G54740.1	Protein of unknown function (DUF3049)	protein FANTASTIC FOUR 4
Storvum014633t1	0.214508	1.10664	0.887738	1.17945	-0.129052	-1.29842	0.289358	-0.784447	-1.46578	AT3G19500.1	basic helix-loop-helix (bHLH) DNA-binding superfamily protein	transcription factor bHLH113
Storvum014648t1	1.21454	0.798993	0.99342	0.681434	-0.829284	-0.573385	0.264812	-1.05609	-1.49443	AT2G38090.1	Duplicated homeodomain-like superfamily protein	transcription factor DIVARICATA-like
Storvum014670t1	0.905546	1.0328	0.0966053	0.295813	0.00589538	0.0632443	0.836821	-1.42605	-1.81068	AT1G69080.1	Adenine nucleotide alpha hydrolases-like superfamily protein	universal stress protein PHOS32
Storvum014676t1	0.89715	1.2467	1.13141	0.153875	-1.22919	-1.3679	0.417491	-0.619627	-0.629914	AT5G02140.1	Pathogenesis-related thaumatin superfamily protein	Thaumatin-like protein
Storvum014698t1	1.25377	0.602845	0.64325	1.05044	-0.783188	-1.15909	0.484561	-0.757926	-1.33466	AT5G06060.1	NAD(P)-binding Rossmann-fold superfamily protein	tropinone reductase homolog At5g06060-like
Storvum014721t1	1.23216	0.892671	0.797029	0.7157	-0.873185	-1.19033	0.421838	-0.691044	-1.30484	AT1G24480.1	S-adenosyl-L-methionine-dependent methyltransferases superfamily protein	S-adenosyl-L-methionine-dependent methyltransferases superfamily protein
Storvum014746t1	0.446669	0.479681	0.57468	0.957456	-0.282856	-1.11138	1.34835	-0.832219	-1.58038	AT1G52340.1	NAD(P)-binding Rossmann-fold superfamily protein	secoisolariciresinol dehydrogenase-like
Storvum014754t1	0.793036	1.09206	1.08544	0.577154	-0.852962	-1.02889	0.569181	-0.94511	-1.28991	AT3G56230.1	BTB/POZ domain-containing protein	BTB/POZ domain-containing protein At3g56230
Storvum014778t1	0.700424	0.0373288	0.403142	1.24041	-0.577668	-1.13622	1.37808	-0.713658	-1.33183	AT3G48310.1	cytochrome P450, family 71, subfamily A, polypeptide 22	cytochrome P450 CYP736A12-like
Storvum014850t1	1.35974	0.629063	0.325011	0.86443	-1.43277	-1.05161	0.0238924	-1.22076	0.502992	AT2G28660.1	Chloroplast-targeted copper chaperone protein	protein SODIUM POTASSIUM ROOT DEFECTIVE 2
Storvum014880t1	0.791421	0.848788	1.09839	0.557139	-1.18878	-0.869169	0.605241	-0.249587	-1.59345	AT1G09610.1	Protein of unknown function (DUF579)	glucuronoxylan 4-O-methyltransferase 1
Storvum014961t1	0.732471	1.09018	1.52469	-0.143394	-0.790981	-0.827906	0.11978	-0.0937768	-1.61106	AT2G18460.1	like COV 3	protein LIKE COV 3
Storvum015035t1	1.58608	-0.00726575	0.374283	-0.119064	-1.35708	0.168173	1.25704	-1.13927	-0.762887	AT1G29930.1	chlorophyll A/B binding protein 1	Chlorophyll a-b binding protein 3C, chloroplastic
Storvum015141t1	1.13994	0.72377	0.173794	1.19297	-1.46631	-0.926889	0.67318	-0.510054	-1.0004	AT3G47550.6	RING/FYVE/PHD zinc finger superfamily protein	Protein involved in mRNA turnover and stability
Storvum015145t1	0.971594	0.998131	0.362877	1.04925	-1.11359	-0.725771	0.654969	-0.769389	-1.42806	AT3G50560.1	NAD(P)-binding Rossmann-fold superfamily protein	3-ketodihydrosphingosine reductase-like
Storvum015166t1	1.27398	0.800681	-0.407179	0.864443	-1.18798	0.68141	0.22183	-0.691681	-1.5555	AT5G60440.1	AGAMOUS-like 62	agamous-like MADS-box protein AGL62
Storvum015211t1	1.28473	0.0893631	1.09602	-0.883817	-0.467414	-1.65693	1.09551	-0.419598	-0.137863	AT3G46620.1	zinc finger (C3HC4-type RING finger) family protein	E3 ubiquitin-protein ligase RING1-like
Storvum015359t2	0.828683	1.03759	0.643752	1.02507	-0.50601	-1.36795	0.392561	-0.590272	-1.46343	AT2G29390.2	sterol 4-alpha-methyl-oxidase 2-2	methylsterol monooxygenase 2-2
Storvum015406t1	0.0879085	0.821485	1.2905	1.16139	-0.862571	-0.581661	0.509996	-1.30151	-1.12553	AT2G25080.1	glutathione peroxidase 1	glutathione peroxidase
Storvum015433t1	0.509089	1.424	0.40027	1.03493	-0.82056	-0.91153	0.467644	-0.529515	-1.57432	AT3G50870.1	GATA type zinc finger transcription factor family protein	GATA transcription factor 19-like
Storvum015468t1	0.650731	0.217908	1.1102	0.517376	-0.449556	0.40933	0.595496	-0.956187	-2.0953	AT5G43290.1	WRKY DNA-binding protein 49	probable WRKY transcription factor 49
Storvum015470t1	1.10402	0.822403	0.825406	1.14316	-0.576877	-1.0263	0.0440983	-1.15287	-1.18304	AT5G15150.1	homeobox 3	homeobox-leucine zipper protein HAT7-like isoform X2
Storvum015494t1	1.7678	0.75994	0.651223	0.169362	-0.601508	-0.776368	0.310423	-0.838357	-1.44251	AT1G10780.1	F-box/RNI-like superfamily protein	F-box/FBD/LRR-repeat protein At5g53840-like
Storvum015601t1	0.720298	1.19017	1.31059	0.400205	-0.427417	-0.685752	0.0672948	-0.961306	-1.61408	AT3G24750.1		PREDICTED: uncharacterized protein LOC102592016
Storvum015608t1	0.688932	0.999472	0.680851	1.26173	-1.10497	-0.9396	0.391505	-0.629983	-1.34794	AT2G47140.1	NAD(P)-binding Rossmann-fold superfamily protein	short-chain dehydrogenase reductase 3b-like
Storvum015612t1	0.867015	0.353756	0.151994	1.20786	-1.24552	-1.40105	0.935272	0.226499	-1.09582	AT5G39530.1	Protein of unknown function (DUF1997)	PREDICTED: uncharacterized protein LOC102603431
Storvum015657t1	0.961373	0.9639	0.735136	1.13492	-1.09452	-0.556572	0.203545	-1.09334	-1.25445	AT2G25810.1	tonoplast intrinsic protein 4;1	aquaporin TIP4-1
Storvum015668t1	0.800302	0.228298	-0.122904	1.66333	-1.13344	-1.71233	0.276681	0.340853	-0.340781	AT2G37640.1	Barwin-like endoglucanases superfamily protein	expansin-A3-like
Storvum015686t1	0.925332	1.07885	0.97049	0.725785	-0.191344	-1.10517	-0.165141	-0.519462	-1.71933	AT3G60530.1	GATA transcription factor 4	GATA transcription factor 4-like
Storvum015719t1	1.21731	0.886721	0.880143	0.749486	-0.613	-1.09931	0.170354	-0.659713	-1.532	AT2G37640.1	Barwin-like endoglucanases superfamily protein	expansin-A3-like
Storvum015752t1	0.708492	0.881613	0.762131	1.07997	0.106458	-1.57188	-0.0566455	-0.378903	-1.53124	AT2G47610.1	Ribosomal protein L7Ae/L30e/S12e/Gadd45 family protein	60S ribosomal protein L7a-1-like
Storvum015798t1	0.475423	0.586354	1.22441	0.401177	-1.27818	-0.923434	1.28776	-0.724688	-1.04883	AT2G03810.4	18S pre-ribosomal assembly protein gar2-related	protein BREAKING OF ASYMMETRY IN THE STOMATAL LINEAGE-like isoform X2
Storvum015881t1	0.950851	0.359599	0.82091	-0.217908	-1.12563	-0.458072	1.64583	-0.755287	-1.2203	AT5G52900.1		probable membrane-associated kinase regulator 6
Storvum015886t1	0.917779	1.45703	0.0541988	-0.482211	0.00725818	-1.34618	0.910877	-0.0508528	-1.46791	AT3G29300.1		Regulatory protein
Storvum015899t1	0.726431	1.729	0.684011	0.497387	-0.390192	-0.952328	-0.121335	-0.678588	-1.49439	AT5G65340.1	Protein of unknown function, DUF617	protein MIZU-KUSSEI 1-like
Storvum015931t1	0.276846	-0.75777	1.78119	0.835527	0.420874	-1.39062	0.0900436	-0.0939889	-1.16211	AT1G12700.1	ATP binding;nucleic acid binding;helicases	putative pentatricopeptide repeat-containing protein At1g12700, mitochondrial
Storvum015950t1	0.296618	0.941749	1.41349	1.07211	-0.535783	-0.866755	-0.0566908	-0.7638	-1.50094	AT5G66320.2	GATA transcription factor 5	GATA transcription factor 5-like
Storvum015962t1	1.03896	0.907565	0.823872	0.684132	-0.900535	-0.867831	0.667331	-0.884193	-1.4693	AT1G53163.1		probable membrane-associated kinase regulator 1
Storvum015975t2	1.04401	0.246452	2.00759	-0.431699	-0.702661	-1.2002	-0.336622	0.127325	-0.754185	AT3G26420.1	RNA-binding (RRM/RBD/RNP motifs) family protein with retrovirus zinc finger-like domain	Putative polyprotein, identical
Storvum016040t1	0.569961	1.33179	1.45839	0.264363	-1.13939	-0.384592	0.00139696	-0.893582	-1.20834	AT5G47450.1	tonoplast intrinsic protein 2;3	probable aquaporin TIP-type RB7-18C
Storvum016082t1	1.13634	0.0316432	0.740482	1.17499	-0.715233	-1.35869	0.618547	-0.216826	-1.41125	AT5G25930.1	Protein kinase family protein with leucine-rich repeat domain	receptor-like protein kinase 5
Storvum016108t1	0.208394	1.31386	0.295953	1.33593	-0.182127	-0.744324	0.36636	-0.928161	-1.66588	AT2G03090.1	expansin A15	expansin-A15-like
Storvum016146t1	1.7227	0.477044	0.106952	-0.0528254	-1.25647	-0.146646	0.928909	-1.49967	-0.27999	AT1G44000.1		protein STAY-GREEN LIKE, chloroplastic
Storvum016150t1	0.519693	1.23374	0.434003	1.10277	0.139398	-1.28452	0.221184	-0.805408	-1.56087	AT5G56120.1		RNA polymerase II elongation factor ELL3 isoform 1
Storvum016153t2	1.52058	0.76686	0.416053	0.715902	-0.743641	-1.0708	0.550733	-1.28731	-0.868369	AT5G20110.1	Dynein light chain type 1 family protein	Dynein light chain 1, cytoplasmic
Storvum016174t1	0.581724	1.62406	0.453065	0.980073	-0.419021	-1.0691	0.00748967	-0.754732	-1.40356	AT2G01050.1	zinc ion binding;nucleic acid binding	PREDICTED: uncharacterized protein LOC107063010
Storvum016184t1	0.767927	1.00763	0.483648	0.190427	-1.62597	-0.0563676	1.21405	-1.1339	-0.847448	AT2G36830.1	gamma tonoplast intrinsic protein	aquaporin TIP1-1
Storvum016185t1	0.423622	1.28017	0.680796	0.158036	-1.02995	-0.114654	1.15863	-1.21246	-1.34419	AT3G24020.1	Disease resistance-responsive (dirigent-like protein) family protein	dirigent protein 16-like
Storvum016193t1	0.43467	0.632879	1.169	0.57672	-1.03443	0.252252	0.744206	-1.09378	-1.68151	AT1G66140.1	zinc finger protein 4	zinc finger protein 4-like
Storvum016199t1	0.797172	0.947603	0.872198	1.08493	-1.27413	-0.489459	0.314362	-1.00446	-1.24822	AT3G16240.1	delta tonoplast integral protein	aquaporin TIP2-1
Storvum016204t1	0.73547	1.01319	0.672253	0.424177	-1.2836	-0.178542	1.02881	-0.927981	-1.48377	AT3G16240.1	delta tonoplast integral protein	aquaporin TIP2-1-like
Storvum016221t1	1.36471	0.602722	0.26329	0.895639	-1.10492	-0.404023	0.786635	-1.13062	-1.27343	AT3G16240.1	delta tonoplast integral protein	aquaporin TIP2-1
Storvum016227t1	1.02076	0.605266	1.13046	0.437773	-0.238268	0.0392999	0.12256	-1.25212	-1.86574	AT2G24700.1	Transcriptional factor B3 family protein	B3 domain-containing protein REM10-like isoform X2
Storvum016234t2	0.668121	0.38082	0.0301456	0.4263	-1.27124	-1.12116	1.94704	-0.537664	-0.52236	AT2G19080.1	metaxin-related	PREDICTED: uncharacterized protein LOC107854480, partial
Storvum016250t1	0.538446	1.06664	1.30789	0.478799	-0.58858	-0.864316	0.424731	-0.650156	-1.71346	AT3G50870.1	GATA type zinc finger transcription factor family protein	GATA transcription factor 19-like
Storvum016252t1	0.800865	0.504534	0.436644	0.99238	-1.20118	-0.873251	1.19289	-0.386242	-1.46664	AT5G59360.1		rho GTPase-activating protein gacU-like
Storvum016253t1	1.60052	0.0332341	-0.217031	0.935518	-0.512066	-1.08792	1.118	-0.74765	-1.12261	AT1G21460.1	Nodulin MtN3 family protein	bidirectional sugar transporter SWEET1-like
Storvum016358t1	0.965883	0.840084	0.268991	0.708708	-0.287051	-1.17137	1.12532	-1.04752	-1.40305	AT5G46060.1	Protein of unknown function, DUF599	PREDICTED: uncharacterized protein LOC102594521
Storvum016417t1	1.56059	0.215652	1.0159	0.65229	-1.1433	-0.590957	0.401334	-0.972662	-1.13885	AT1G06620.1	2-oxoglutarate (2OG) and Fe(II)-dependent oxygenase superfamily protein	1-aminocyclopropane-1-carboxylate oxidase homolog
Storvum016428t1	0.988336	0.397093	0.223378	-0.104791	-0.395207	-1.2478	1.86258	-1.12339	-0.600195	AT5G04820.1	ovate family protein 13	transcription repressor OFP13-like
Storvum016437t1	0.316527	0.985932	1.42334	0.899142	-0.320516	-1.57116	-0.369625	-0.204457	-1.15918	AT4G13600.1	Carbohydrate-binding X8 domain superfamily protein	PLASMODESMATA CALLOSE-BINDING PROTEIN 3-like
Storvum016448t1	0.179292	1.29087	1.13937	0.610743	-0.725982	-0.192908	0.464319	-1.26908	-1.49663	AT1G10200.1	GATA type zinc finger transcription factor family protein	LIM domain-containing protein WLIM1-like
Storvum016469t1	1.65136	0.994846	0.348484	0.5437	-0.00636203	-0.832071	-0.204407	-1.34319	-1.15236	AT1G67050.1		probable membrane-associated kinase regulator 1
Storvum016502t1	0.0932123	1.0607	-0.0250768	1.08535	-0.746258	-1.44521	0.706643	0.702273	-1.43163	AT1G70190.2	Ribosomal protein L7/L12, oligomerisation;Ribosomal protein L7/L12, C-terminal/adaptor protein ClpS-like	50S ribosomal protein L7/L12-like
Storvum016514t1	1.84864	0.306779	0.679549	-0.720663	-0.871163	-0.228683	0.519195	0.0238736	-1.55753	AT4G19840.1	phloem protein 2-A1	protein PHLOEM PROTEIN 2-LIKE A1-like
Storvum016575t1	1.3434	0.702894	0.448903	0.520994	0.434825	-0.03708	-0.280584	-1.40832	-1.72503	AT1G70680.1	Caleosin-related family protein	probable peroxygenase 5
Storvum016589t1	1.01593	0.838642	0.476306	0.277158	-0.731344	-0.220907	1.08769	-0.907609	-1.83586	AT2G33310.2	auxin-induced protein 13	auxin-responsive protein IAA13-like
Storvum016621t1	0.784863	0.528734	0.19584	1.27605	-0.866516	-1.05976	1.16555	-0.733524	-1.29123	AT1G17860.1	Kunitz family trypsin and protease inhibitor protein	Serine protease inhibitor 1
Storvum016629t1	0.583289	0.668368	1.63665	0.89173	-0.881217	-0.9624	-0.306878	-0.260418	-1.36912	AT5G15900.1	TRICHOME BIREFRINGENCE-LIKE 19	protein trichome birefringence-like 19
Storvum016638t1	1.01989	0.648994	0.714436	0.754812	-0.033159	-0.0515382	0.229559	-1.56085	-1.72214	AT2G01770.1	vacuolar iron transporter 1	vacuolar iron transporter 1
Storvum016716t1	0.467407	0.21034	0.515392	0.955387	-1.45776	0.217532	1.27597	-0.660354	-1.52392	AT3G07880.1	Immunoglobulin E-set superfamily protein	rho GDP-dissociation inhibitor 1-like
Storvum016767t1	0.489089	1.12854	0.521694	0.465909	-1.07188	-0.57816	1.30007	-0.752459	-1.5028	AT4G03965.1	RING/U-box superfamily protein	putative E3 ubiquitin-protein ligase XBAT35
Storvum016804t1	1.10105	0.8806	0.479277	0.597616	-1.00773	-0.158108	0.820658	-1.23378	-1.47958	AT1G10200.1	GATA type zinc finger transcription factor family protein	LIM domain-containing protein WLIM1-like
Storvum016805t1	1.75475	-0.15725	1.26913	0.383903	-0.621328	-0.579157	0.139102	-1.11741	-1.07174	AT3G06890.1		PREDICTED: uncharacterized protein LOC104115453
Storvum016818t1	0.249331	0.268212	0.0982518	0.53502	-0.316421	-0.89997	2.12436	-0.911613	-1.14717	AT1G30750.1		---NA---
Storvum016836t1	1.34699	1.28128	0.755974	-0.031471	-0.81334	-0.955087	0.285286	-0.401615	-1.46801	AT3G51950.2	Zinc finger (CCCH-type) family protein / RNA recognition motif (RRM)-containing protein	zinc finger CCCH domain-containing protein 53-like isoform X2
Storvum016878t1	1.05347	1.10466	0.917146	0.657729	-0.534796	-1.28754	0.0877594	-0.526012	-1.47242	AT4G36020.1	cold shock domain protein 1	PREDICTED: girdin-like
Storvum016886t1	1.1702	0.885355	1.02084	0.876798	-0.317695	-1.09198	-0.328963	-0.805462	-1.4091	AT1G52820.1	2-oxoglutarate (2OG) and Fe(II)-dependent oxygenase superfamily protein	probable 2-oxoglutarate-dependent dioxygenase AOP1
Storvum016931t1	0.473319	0.90479	1.22368	1.02051	-0.847437	-0.966428	0.24418	-0.478528	-1.57409	AT3G45230.1	hydroxyproline-rich glycoprotein family protein	arabinogalactan protein 1-like isoform X2
Storvum017072t1	0.787836	0.911594	1.55032	0.383128	-0.277697	-1.03547	-0.0210059	-0.828202	-1.4705	AT3G05980.1		protein BNI4-like
Storvum017074t1	1.46703	0.123188	-0.36661	0.654088	-0.812179	-1.08815	1.5179	-0.698708	-0.796555	AT1G04550.2	AUX/IAA transcriptional regulator family protein	auxin-responsive protein IAA13-like
Storvum017083t1	0.37406	0.782135	1.19271	0.866155	-0.145904	-1.18289	0.445887	-0.559136	-1.77301	AT2G28190.1	copper/zinc superoxide dismutase 2	superoxide dismutase [Cu-Zn], chloroplastic
Storvum017176t1	0.624335	1.03644	0.674543	0.965406	0.229008	-0.216571	-0.248813	-1.14966	-1.91468	AT5G65340.1	Protein of unknown function, DUF617	protein MIZU-KUSSEI 1-like
Storvum017195t1	0.52087	1.10812	0.77238	0.174412	-1.13672	-0.308164	1.25846	-1.03909	-1.35027	AT2G36100.1	Uncharacterised protein family (UPF0497)	casparian strip membrane protein 1
Storvum017206t1	0.133296	1.64948	1.16521	0.337652	-0.409397	-0.997408	0.0787332	-0.385055	-1.57252	AT5G62280.1	Protein of unknown function (DUF1442)	DUF1442 domain-containing protein
Storvum017241t1	0.83265	1.08155	1.00048	0.515101	-0.287959	-0.845679	0.257757	-0.666644	-1.88725	AT3G05980.1		protein BNI4-like
Storvum017249t2	0.702091	1.46503	0.402458	0.608682	-0.96006	-0.236347	0.639865	-1.26295	-1.35877	AT1G72230.1	Cupredoxin superfamily protein	blue copper protein-like
Storvum017307t1	1.6794	0.698942	0.630682	0.349496	-1.26948	-0.389953	0.0716265	-0.239324	-1.53139	AT4G23160.1	cysteine-rich RLK (RECEPTOR-like protein kinase) 8	uncharacterized mitochondrial protein AtMg00810-like
Storvum017345t1	1.86945	0.830197	0.767467	-0.644013	-1.32234	-0.0478411	-0.209309	-0.971234	-0.272375	AT2G46150.1	Late embryogenesis abundant (LEA) hydroxyproline-rich glycoprotein family	late embryogenesis abundant protein
Storvum017393t1	0.734545	0.976367	0.884399	0.954171	-0.924376	-1.03154	0.574337	-0.755132	-1.41277	AT5G28640.1	SSXT family protein	GRF1-interacting factor 1-like isoform X1
Storvum017421t1	-0.00822507	0.804626	1.61902	0.0115148	-1.3064	-0.140354	1.00177	-0.854674	-1.12728	AT4G34050.1	S-adenosyl-L-methionine-dependent methyltransferases superfamily protein	caffeoyl-CoA O-methyltransferase 6
Storvum017428t1	1.20381	0.770899	0.852144	0.850501	-0.243674	-1.02789	0.147669	-1.51044	-1.04302	AT3G09270.1	glutathione S-transferase TAU 8	probable glutathione S-transferase
Storvum017446t1	1.04084	0.828398	0.461786	0.998616	-0.984616	-1.32806	0.79529	-0.82833	-0.983925	AT1G30450.2	cation-chloride co-transporter 1	wound-induced proteinase inhibitor 2-like
Storvum017496t1	0.65567	1.29706	1.09537	0.649769	-0.782603	-0.819026	0.291715	-1.04208	-1.34588	AT1G80690.1	PPPDE putative thiol peptidase family protein	deSI-like protein At4g17486 isoform X1
Storvum017713t1	-0.166987	0.938251	0.88871	-0.660216	-1.08174	-1.84408	0.808587	0.651276	0.466198	AT2G40475.1		PREDICTED: uncharacterized protein LOC109214328
Storvum017756t1	1.01191	0.659357	0.859711	1.3152	-0.642881	-0.447791	-0.180612	-1.0519	-1.52299	AT4G23160.1	cysteine-rich RLK (RECEPTOR-like protein kinase) 8	retrovirus-related Pol polyprotein from transposon TNT 1-94
Storvum017767t3	0.687428	1.02727	1.24804	0.731493	-1.15479	-0.00640775	-0.131986	-0.930356	-1.47069	AT1G08650.2	phosphoenolpyruvate carboxylase kinase 1	phosphoenolpyruvate carboxylase kinase 1-like
Storvum017777t1	0.311054	1.06553	1.24461	0.317123	-0.858488	-0.491823	0.862298	-0.781385	-1.66891	AT1G52140.1		TRNA methyltransferase 10 B like
Storvum017789t1	1.52198	0.346079	0.38344	1.21997	-0.584498	-0.976342	0.331975	-1.18735	-1.05526	AT2G31100.1	alpha/beta-Hydrolases superfamily protein	phospholipase A1-IIgamma-like
Storvum017796t1	0.862186	1.35762	0.593547	0.320331	-0.418727	-0.338804	0.496441	-1.0515	-1.82109	AT2G37210.1	lysine decarboxylase family protein	Cytokinin riboside 5'-monophosphate phosphoribohydrolase LOG3
Storvum017798t1	-0.332869	-0.0256607	1.71856	0.731924	0.331188	-1.30214	0.781271	-0.655838	-1.24643	AT2G37210.1	lysine decarboxylase family protein	cytokinin riboside 5'-monophosphate phosphoribohydrolase LOG3
Storvum017840t1	1.10418	1.0111	0.732115	0.81051	-1.21138	-1.10553	0.389084	-0.527437	-1.20263	AT1G49620.1	Cyclin-dependent kinase inhibitor family protein	cyclin-dependent kinase inhibitor 7
Storvum017854t1	0.310941	1.38171	0.676501	1.28543	-0.559173	-1.21971	-0.137329	-0.34287	-1.3955	AT2G40470.1	LOB domain-containing protein 15	LOB domain-containing protein 15
Storvum017964t1	0.612308	1.10605	0.822266	1.1119	-0.241719	-1.37475	0.0408644	-0.601145	-1.47577	AT1G62770.1	Plant invertase/pectin methylesterase inhibitor superfamily protein	21 kDa protein-like
Storvum017980t1	1.09512	0.919381	0.518266	1.05358	-1.27955	-0.56488	0.373644	-1.40639	-0.709171	AT4G20260.5	plasma-membrane associated cation-binding protein 1	plasma membrane-associated cation-binding protein 1
Storvum017988t1	0.363036	0.445675	1.1719	1.35139	-0.781284	-1.26843	0.605357	-0.717301	-1.17033	AT1G29500.1	SAUR-like auxin-responsive protein family	auxin-responsive protein SAUR68-like
Storvum018014t1	1.0688	1.49989	0.264014	0.195189	-1.05193	-0.207057	0.609815	-1.46298	-0.91573	AT5G24270.2	Calcium-binding EF-hand family protein	calcineurin B-like protein 7
Storvum018053t2	0.56102	0.579102	0.679101	0.620905	-0.590945	-0.810904	1.44237	-0.828517	-1.65213	AT2G47810.1	nuclear factor Y, subunit B5	nuclear transcription factor Y subunit B-4-like
Storvum018125t1	0.848671	0.731522	1.0494	0.816984	-0.228515	-0.731223	0.41059	-1.34174	-1.55569	AT3G10080.1	RmlC-like cupins superfamily protein	germin-like protein subfamily 3 member 2
Storvum018130t1	1.64643	0.516157	-0.0307578	0.970326	-1.54455	-0.808709	0.36656	-0.934724	-0.180733	AT4G25250.1	Plant invertase/pectin methylesterase inhibitor superfamily protein	21 kDa protein-like
Storvum018228t1	0.474618	0.171616	1.92239	0.128336	0.594198	-0.537874	-0.229097	-0.985841	-1.53834	AT3G28420.1	Putative membrane lipoprotein	DUF761 domain-containing protein
Storvum018283t1	1.87624	-0.612682	0.80694	-0.433883	-0.136355	0.00579498	0.737485	-0.81708	-1.42646	AT4G23160.1	cysteine-rich RLK (RECEPTOR-like protein kinase) 8	retrovirus-related pol polyprotein from transposon tnt 1-94
Storvum018317t1	0.572547	0.320352	0.112206	1.48292	-0.0651507	-0.930719	0.758186	-0.294325	-1.95601	AT4G23160.1	cysteine-rich RLK (RECEPTOR-like protein kinase) 8	uncharacterized mitochondrial protein AtMg00810-like
Storvum018358t1	1.31427	0.991717	0.492825	0.965759	-0.794164	-1.00478	0.224919	-0.986825	-1.20372	AT4G31320.1	SAUR-like auxin-responsive protein family	auxin-responsive protein SAUR72-like
Storvum018367t1	1.29174	0.843315	0.362946	0.719664	-0.925815	-1.3773	0.703477	-0.354816	-1.26321	AT1G14900.1	high mobility group A	HMG-Y-related protein A-like
Storvum018519t1	0.897402	1.07322	-0.131096	0.94676	-0.876253	-0.775714	1.10912	-1.04067	-1.20276	AT1G14160.1	Uncharacterised protein family (UPF0497)	casparian strip membrane protein 1
Storvum018564t1	0.594389	1.24742	0.854307	-0.0120593	-1.0292	-0.919596	1.2304	-0.912321	-1.05334	AT4G23690.1	Disease resistance-responsive (dirigent-like protein) family protein	disease resistance response protein 206-like
Storvum018629t1	1.0669	0.749986	1.16238	0.815621	-0.67272	-0.0986488	-0.432972	-0.922653	-1.66789	NA	NA	---NA---
Storvum018640t1	0.940299	1.4425	0.813716	0.563847	-1.15231	-0.778907	0.11253	-1.30455	-0.637126	AT2G38480.1	Uncharacterised protein family (UPF0497)	CASP-like protein 4B1
Storvum018642t1	0.618561	0.965172	0.2146	1.21237	0.20461	-0.466423	-0.16165	-0.416837	-2.1704	AT5G20635.1		guanine nucleotide-binding protein subunit gamma 3
Storvum018679t1	0.754716	0.842515	1.4188	0.764353	-1.00506	-1.09472	0.182058	-0.660328	-1.20234	AT5G14920.1	Gibberellin-regulated family protein	gibberellin-regulated protein 14-like
Storvum018765t1	1.51483	1.05128	0.250499	0.888626	-1.09058	-1.44829	-0.387076	-0.450241	-0.329041	AT5G60920.1	COBRA-like extracellular glycosyl-phosphatidyl inositol-anchored protein family	protein COBRA-like
Storvum018800t1	1.10237	0.995667	0.631649	0.859867	-1.16085	-1.20198	0.493338	-1.12466	-0.595404	AT5G23750.2	Remorin family protein	Remorin
Storvum018842t1	1.16113	0.299601	-0.178367	1.47845	-0.888356	0.00970819	0.627859	-1.18162	-1.32841	AT1G07970.1		trypsin proteinase inhibitor precursor
Storvum018929t1	1.35125	0.0267518	0.350856	1.0349	-0.567078	-0.758892	0.981607	-0.90024	-1.51915	AT5G46910.1	Transcription factor jumonji (jmj) family protein / zinc finger (C5HC2 type) family protein	lysine-specific demethylase JMJ706-like
Storvum018936t1	0.692369	0.913634	0.797548	1.00401	-0.92749	-1.33544	0.5825	-0.330957	-1.39617	AT5G48480.1	Lactoylglutathione lyase / glyoxalase I family protein	early tobacco anther 1
Storvum019048t1	1.06321	1.12004	0.504941	0.42998	-0.975527	-0.457448	0.778136	-0.798761	-1.66458	AT5G45970.1	RAC-like 2	rac-like GTP-binding protein RAC13
Storvum019052t1	0.974498	0.59549	0.832397	0.675549	0.79566	-0.581649	-0.352956	-1.21289	-1.7261	AT1G64640.1	early nodulin-like protein 8	early nodulin-like protein 1
Storvum019055t1	0.673413	0.965326	0.961086	0.777625	-0.505669	0.292439	-0.0867151	-1.507	-1.57051	NA	NA	---NA---
Storvum019057t1	0.640299	0.527494	1.3939	1.30332	-0.886016	-0.906351	-0.122918	-0.702977	-1.24675	AT5G66800.1		PREDICTED: uncharacterized protein LOC107010491
Storvum019149t2	0.57658	0.774998	0.830899	1.25444	-0.368552	-0.759001	0.38528	-0.952353	-1.74229	AT2G16700.1	actin depolymerizing factor 5	actin-depolymerizing factor 5-like
Storvum019174t1	1.52914	0.484594	-0.0490048	0.801389	-0.940697	-0.640514	0.997081	-0.853902	-1.32808	NA	NA	PREDICTED: uncharacterized protein LOC107815828
Storvum019284t1	1.45206	0.217287	-0.00643214	0.607162	-0.520068	-0.614982	1.31393	-0.998798	-1.45016	AT3G25510.1	disease resistance protein (TIR-NBS-LRR class), putative	TMV resistance protein N-like
Storvum019301t1	0.925778	0.615006	0.549982	1.20167	-1.00145	-0.0749965	0.463399	-1.01922	-1.66016	AT5G20740.1	Plant invertase/pectin methylesterase inhibitor superfamily protein	21 kDa protein-like
Storvum019316t1	1.00074	0.884996	0.190972	1.5013	-1.06408	-0.908637	0.22504	-0.567789	-1.26254	AT4G15630.1	Uncharacterised protein family (UPF0497)	CASP-like protein 1E2
Storvum019344t1	-0.0793518	0.553095	1.50994	1.11455	0.487383	-1.09923	-0.313308	-0.725653	-1.44743	AT1G53350.1	Disease resistance protein (CC-NBS-LRR class) family	putative late blight resistance protein homolog R1A-3
Storvum019382t1	1.3502	1.00517	0.685289	-0.145135	-0.517333	-0.582472	0.718964	-0.815595	-1.69909	AT2G21910.1	cytochrome P450, family 96, subfamily A, polypeptide 5	glycine-rich cell wall structural protein-like
Storvum019402t1	0.807857	0.639874	1.69923	0.451713	-0.562932	-0.825991	0.0335127	-0.715378	-1.52789	AT1G01470.1	Late embryogenesis abundant protein	desiccation protectant protein Lea14 homolog
Storvum019506t2	0.72409	-0.0637534	1.1597	1.16155	0.655275	-0.720943	-0.160005	-1.32672	-1.42919	AT1G68350.1		PREDICTED: uncharacterized protein LOC102590943
Storvum019518t1	1.43354	0.242783	0.457236	0.65172	-0.145973	-0.102888	0.57977	-1.67825	-1.43794	AT3G46730.1	NB-ARC domain-containing disease resistance protein	disease resistance protein RPP13-like
Storvum019632t1	-0.10644	0.254724	-0.709593	0.520185	0.73457	-0.862724	1.69933	0.185647	-1.7157	AT5G20220.2	zinc knuckle (CCHC-type) family protein	uncharacterized protein LOC101258793
Storvum019684t1	1.04006	0.600498	0.732608	0.925792	-1.36581	-1.27161	0.490533	0.0473344	-1.19941	AT5G20810.1	SAUR-like auxin-responsive protein family	auxin-responsive protein SAUR71-like
Storvum019694t1	0.125999	0.43837	1.43643	1.09951	0.457691	-1.53059	-0.236046	-0.503707	-1.28766	NA	NA	leucine-rich repeat extensin-like protein 3
Storvum019697t1	0.929689	-0.177459	0.525233	1.26352	-1.18342	-0.91107	0.77234	0.30218	-1.52101	AT3G02140.1	AFP2 (ABI five-binding protein 2) family protein	craniofacial development protein 2-like
Storvum019759t1	1.16989	1.08824	0.675469	0.743859	-0.985049	-0.107112	0.0123691	-1.5009	-1.09676	AT3G48940.1	Remorin family protein	remorin-like
Storvum019760t1	0.492009	0.462077	1.19142	1.14571	-0.887164	-1.21407	0.596066	-0.344851	-1.44119	AT1G08940.1	Phosphoglycerate mutase family protein	phosphoglycerate mutase-like protein AT74
Storvum019761t1	1.5165	0.590884	0.822555	0.839966	-1.13909	-0.66325	0.131187	-0.972189	-1.12656	AT3G48550.1		protein SHOOT GRAVITROPISM 5
Storvum019845t3	0.800289	1.18455	0.686114	0.851788	-0.471546	-1.37447	0.260062	-0.374537	-1.56226	AT2G36026.1	Ovate family protein	transcription repressor OFP6-like
Storvum019847t1	1.15757	0.868647	1.06466	0.580124	-0.263955	-0.255864	-0.311379	-1.1274	-1.7124	AT5G20810.1	SAUR-like auxin-responsive protein family	auxin-responsive protein SAUR72-like
Storvum019861t1	0.317246	-0.215865	1.9916	-0.203507	-0.0758796	-0.223664	0.806576	-0.832968	-1.56354	AT5G52050.1	MATE efflux family protein	NBS-LRR resistance protein-like protein
Storvum019869t1	0.466631	-0.0508379	0.452412	1.69356	-0.384878	-0.0389311	0.685804	-1.18823	-1.63553	AT1G22900.1	Disease resistance-responsive (dirigent-like protein) family protein	dirigent protein 11-like
Storvum019878t1	0.584082	1.42237	0.532549	0.150633	-1.06489	-0.647772	1.18632	-0.962163	-1.20113	AT5G15290.1	Uncharacterised protein family (UPF0497)	casparian strip membrane protein 2
Storvum020072t1	0.190983	0.427711	-1.31019	1.51625	0.122421	-0.618972	1.12518	-1.44943	-0.00395525	AT3G56380.1	response regulator 17	two-component response regulator ARR17-like
Storvum020111t1	0.657619	-0.112748	0.741737	-0.19224	0.212517	-1.84687	1.26496	0.545441	-1.27042	AT1G58807.2	Disease resistance protein (CC-NBS-LRR class) family	putative late blight resistance protein homolog R1B-16 isoform X1
Storvum020143t1	0.965985	0.617052	1.05957	1.11148	-0.746698	-0.963884	0.220033	-1.47179	-0.791743	AT2G20080.1		protein SPEAR3-like
Storvum020202t1	0.465409	1.80319	0.622697	0.592964	-1.27021	-0.933991	-0.353538	0.150163	-1.07668	AT4G02790.1	GTP-binding family protein	Ribosomal protein S10
Storvum020232t1	1.08433	1.28486	0.10075	1.22932	-0.454794	-0.695503	-0.293878	-0.71991	-1.53518	AT1G12100.1	Bifunctional inhibitor/lipid-transfer protein/seed storage 2S albumin superfamily protein	14 kDa proline-rich protein DC2.15-like
Storvum020256t1	0.22045	1.28345	0.990665	0.988776	0.286762	-1.28551	-0.24722	-1.27079	-0.966578	AT3G27330.1	zinc finger (C3HC4-type RING finger) family protein	putative E3 ubiquitin-protein ligase RING1a
Storvum020268t2	1.21926	0.304021	0.318779	0.964978	-1.41606	0.663686	0.278277	-1.43456	-0.898378	AT2G45180.1	Bifunctional inhibitor/lipid-transfer protein/seed storage 2S albumin superfamily protein	14 kDa proline-rich protein DC2.15-like
Storvum020275t1	1.55933	1.43688	0.556453	0.307468	-0.793096	-0.725672	-0.505897	-0.960933	-0.874524	AT4G31470.1	CAP (Cysteine-rich secretory proteins, Antigen 5, and Pathogenesis-related 1 protein) superfamily protein	pathogenesis-related protein PRB1-3-like
Storvum020341t1	1.23328	0.693403	0.451789	1.17155	-1.10826	-0.41896	0.287486	-1.52013	-0.790171	AT3G22600.1	Bifunctional inhibitor/lipid-transfer protein/seed storage 2S albumin superfamily protein	non-specific lipid-transfer protein-like protein At2g13820
Storvum020434t1	1.32095	1.0872	1.17638	-0.0938134	-0.308419	-0.829088	-0.180845	-1.58898	-0.583394	AT4G27300.1	S-locus lectin protein kinase family protein	G-type lectin S-receptor-like serine/threonine-protein kinase At4g27290 isoform X1
Storvum020455t1	2.10807	0.0283873	0.361899	0.374678	-0.852511	-1.2732	0.18535	0.0167601	-0.949434	AT4G23160.1	cysteine-rich RLK (RECEPTOR-like protein kinase) 8	retrovirus-related Pol polyprotein from transposon TNT 1-94
Storvum020564t1	-0.110002	2.00061	0.737116	0.0322786	-0.0328171	-1.21883	0.445124	-0.787732	-1.06575	AT3G03280.1		serinethreonine-protein kinase ctr1
Storvum020629t1	1.17478	0.501132	0.771711	-0.0110394	0.446532	-0.322327	0.223125	-0.513056	-2.27086	AT3G57410.1	villin 3	villin-2-like
Storvum020633t1	1.28463	0.876883	0.266537	0.867041	-0.451214	-0.800146	0.61537	-1.32213	-1.33696	AT2G39518.1	Uncharacterised protein family (UPF0497)	CASP-like protein PIMP1
Storvum020635t1	0.37109	1.64998	1.10754	0.587349	-0.554464	-1.07024	-0.108981	-0.727671	-1.25459	AT5G66800.1		PREDICTED: uncharacterized protein LOC102596045
Storvum020663t1	0.972538	0.987888	0.722423	0.751355	-0.545186	-1.10685	0.619316	-0.882652	-1.51883	AT1G60010.1		T10O24.15, related
Storvum020681t1	1.32071	0.679848	1.31399	0.495793	-0.0215506	-0.689567	-0.81605	-0.950823	-1.33236	AT2G47270.1	sequence-specific DNA binding transcription factors;transcription regulators	transcription factor upbeat1
Storvum020710t1	-0.219081	1.44289	0.574235	1.63606	-0.832182	-0.414638	-0.219376	-0.898074	-1.06983	AT5G35110.1		PREDICTED: uncharacterized protein LOC107025371
Storvum020734t1	1.24068	0.865948	0.0953158	1.15113	-0.574581	-0.261179	0.274008	-1.33449	-1.45683	AT2G45180.1	Bifunctional inhibitor/lipid-transfer protein/seed storage 2S albumin superfamily protein	14 kDa proline-rich protein DC2.15-like
Storvum020754t1	0.0841855	0.953893	1.69711	-0.843164	-1.20714	-1.08194	0.541491	-0.601595	0.457164	AT3G63030.1	methyl-CPG-binding domain 4	methyl-CpG-binding domain-containing protein 4-like
Storvum020824t1	0.600252	-0.0963188	0.857219	1.66592	0.15794	-1.21842	0.282218	-1.16058	-1.08823	AT3G11210.1	SGNH hydrolase-type esterase superfamily protein	GDSL esterase/lipase At2g38180-like
Storvum020885t1	0.479277	0.649966	-0.107751	1.15311	-0.209599	-0.195242	1.21386	-1.49599	-1.48763	AT5G16490.1	ROP-interactive CRIB motif-containing protein 4	CRIB domain-containing protein RIC4-like
Storvum020906t1	1.05961	0.656054	1.08242	1.16674	-0.444869	-0.574931	-0.408045	-1.24847	-1.28851	AT4G21310.1	Protein of unknown function (DUF1218)	At4g21310p-like protein
Storvum020964t1	1.68423	1.10058	0.349772	0.344987	-0.758396	-1.16811	0.257695	-0.72475	-1.08601	AT1G13570.1	F-box/RNI-like superfamily protein	F-box/FBD/LRR-repeat protein At1g13570-like
Storvum020972t1	0.686827	0.748739	0.813335	1.2362	-0.426129	-1.17102	0.435767	-0.75236	-1.57135	AT3G27200.1	Cupredoxin superfamily protein	mavicyanin-like isoform X1
Storvum021037t3	0.0812182	1.61002	0.986799	0.749119	0.0776569	-0.544693	-0.354411	-1.15607	-1.44964	AT4G23160.1	cysteine-rich RLK (RECEPTOR-like protein kinase) 8	uncharacterized mitochondrial protein AtMg00810-like
Storvum021058t1	0.949712	0.663836	0.899117	0.89871	0.126972	-1.09308	0.214912	-0.979469	-1.68071	AT4G11600.1	glutathione peroxidase 6	glutathione peroxidase
Storvum021083t1	1.34347	-0.152709	0.784096	1.39105	-0.64974	-0.936611	0.105705	-0.425785	-1.45948	AT1G21280.1		Eukaryotic translation initiation factor 4G
Storvum021092t1	0.805082	1.02058	0.748122	1.09426	-0.574707	-0.51093	0.0806343	-0.879064	-1.78398	AT1G74670.1	Gibberellin-regulated family protein	gibberellin-regulated protein 6-like
Storvum021157t1	1.10677	0.765426	0.683978	1.14155	-0.757731	-0.710619	0.292485	-1.06903	-1.45283	AT4G18550.1	alpha/beta-Hydrolases superfamily protein	phospholipase A1-IIgamma-like
Storvum021271t1	0.90594	1.30595	0.636975	0.941078	-0.677129	-0.606214	0.039193	-1.0338	-1.51199	AT4G29340.1	profilin 4	profilin-1
Storvum021294t1	0.741098	0.86152	0.57155	0.998151	0.00752678	-1.65932	0.279353	-0.216431	-1.58344	AT1G50060.1	CAP (Cysteine-rich secretory proteins, Antigen 5, and Pathogenesis-related 1 protein) superfamily protein	pathogenesis-related protein 1
Storvum021328t1	0.996536	0.662607	1.42193	0.472783	-1.4901	0.0520927	-0.0700808	-0.992384	-1.05339	AT5G46450.1	Disease resistance protein (TIR-NBS-LRR class) family	putative late blight resistance protein homolog R1A-10
Storvum021400t1	0.172369	1.44021	0.73053	1.15465	-0.626865	-1.19762	-0.345045	0.110746	-1.43897	AT4G04690.1	F-box and associated interaction domains-containing protein	hypothetical protein CDL15_Pgr000026
Storvum021430t1	0.60698	1.07333	0.91295	1.05604	-0.92952	-1.40569	0.30412	-0.428921	-1.18928	AT1G50720.1	Stigma-specific Stig1 family protein	Stigma-specific STIG1-like protein 2
Storvum021435t1	0.725281	1.16185	0.898349	0.698125	-0.677603	-0.537352	0.431062	-0.995063	-1.70464	AT3G15680.1	Ran BP2/NZF zinc finger-like superfamily protein	TATA-binding protein-associated factor 2N isoform X1
Storvum021518t1	0.688927	0.816748	0.653755	1.37655	0.236264	-1.27296	-0.209468	-0.833251	-1.45656	AT4G12880.1	early nodulin-like protein 19	blue copper protein-like
Storvum021612t1	0.953006	1.08159	0.471365	1.06674	-1.29327	-0.865905	0.519013	-0.929124	-1.00341	AT1G68630.1	PLAC8 family protein	cell number regulator 2-like
Storvum021635t1	0.384709	-0.529107	1.46768	0.467487	-0.169757	-1.55103	0.262436	0.982871	-1.31529	AT3G20380.1	TRAF-like family protein	replication protein A 70 kDa DNA-binding subunit B-like
Storvum021700t1	1.75968	0.0372666	-0.0468991	0.559311	-1.01476	-0.35705	0.979934	-0.396945	-1.52054	AT1G50180.1	NB-ARC domain-containing disease resistance protein	putative late blight resistance protein homolog R1A-10
Storvum022000t1	0.675886	0.823602	1.02511	0.970324	-0.538472	-1.438	0.466782	-0.588745	-1.39648	AT1G50720.1	Stigma-specific Stig1 family protein	stigma-specific STIG1-like protein 2
Storvum022034t1	1.39273	0.24812	0.773547	0.734517	-0.25911	-1.64897	0.564121	-0.650054	-1.15491	AT1G21280.1		Eukaryotic translation initiation factor 4G
Storvum022065t1	0.316019	0.960882	0.997805	0.769113	-1.31118	-0.353038	0.728594	-0.424507	-1.68369	AT3G01516.1		Chromo domain-containing protein isoform 1
Storvum022173t1	1.18568	0.44824	0.618766	1.1405	0.420374	-0.664264	-0.330494	-1.47888	-1.33991	AT1G01050.1	pyrophosphorylase 1	soluble inorganic pyrophosphatase
Storvum022192t1	0.630803	0.734782	1.43506	0.664331	-1.06481	-0.574233	0.327776	-0.497524	-1.65618	AT1G24020.2	MLP-like protein 423	S-norcoclaurine synthase 2-like
Storvum022218t2	-0.00238332	1.31815	1.48887	0.405338	0.369104	-0.524741	-0.558629	-1.10039	-1.39533	AT4G34750.2	SAUR-like auxin-responsive protein family	auxin-induced protein 6B-like
Storvum022298t1	1.25676	0.501025	0.747778	1.00394	-0.890429	-1.07094	0.501876	-0.631613	-1.4184	AT1G78520.1	Carbohydrate-binding X8 domain superfamily protein	glucan endo-1,3-beta-D-glucosidase-like
Storvum022363t1	0.633457	1.65413	0.41165	0.916677	-1.29761	-0.708085	-0.816131	0.188743	-0.982826	AT1G19890.1	male-gamete-specific histone H3	orf125 (mitochondrion)
Storvum022428t1	-0.100971	0.876372	1.81274	0.594114	-1.36379	-0.483427	-0.298742	0.138711	-1.17501	AT4G29090.1	Ribonuclease H-like superfamily protein	CLIP-associated protein-like
Storvum022449t1	1.56665	0.750154	1.08016	-1.08777	-1.0047	-1.217	-0.0958534	0.262218	-0.253851	AT1G21410.1	F-box/RNI-like superfamily protein	reverse transcriptase
Storvum022518t1	0.370992	1.12706	1.16933	0.669942	-0.674446	-1.11146	0.5869	-0.592135	-1.54618	NA	NA	---NA---
Storvum022525t1	0.574902	1.51723	0.367444	1.01074	-1.16514	-1.09664	0.475636	-0.786166	-0.898002	AT5G50175.1		PREDICTED: uncharacterized protein LOC109243997
Storvum022571t1	0.659327	-0.0442819	-0.411404	-0.307474	0.555252	-0.855562	2.12162	-0.482519	-1.23496	AT4G09160.1	SEC14 cytosolic factor family protein / phosphoglyceride transfer family protein	zinc finger BED domain-containing protein DAYSLEEPER-like
Storvum022635t1	0.19972	1.1234	1.55229	0.195409	0.0801148	-1.29987	0.213953	-0.598764	-1.46625	AT1G25422.1		Mucin-3A like
Storvum022755t1	1.20569	0.526352	1.18645	0.819028	-0.650414	-1.12317	0.206227	-0.851739	-1.31842	AT3G19430.1	late embryogenesis abundant protein-related / LEA protein-related	basic proline-rich protein-like
Storvum022849t1	0.516081	1.06515	1.13514	0.538218	0.227286	-0.876167	0.00739033	-0.679094	-1.934	AT1G11120.2		PREDICTED: uncharacterized protein LOC102578637
Storvum022852t1	0.294476	1.2053	1.25475	0.650099	-0.0973997	-0.871957	-0.0162257	-0.590019	-1.82902	AT1G09030.1	nuclear factor Y, subunit B4	nuclear transcription factor Y subunit B-4-like
Storvum023023t1	0.462619	0.779538	1.01357	1.22543	0.29921	-1.72403	-0.361758	-0.745296	-0.949289	AT2G05920.1	Subtilase family protein	subtilisin-like protease SBT1.7
Storvum023229t1	1.25999	0.847716	1.43216	0.228678	-0.83755	-1.11818	-0.153771	-0.484004	-1.17503	AT5G59030.1	copper transporter 1	copper transporter 6-like
Storvum023243t1	0.146292	0.957816	1.59263	0.0133189	-0.0454137	-0.733625	0.223417	-0.179002	-1.97543	AT3G21510.1	histidine-containing phosphotransmitter 1	histidine-containing phosphotransfer protein 1-like
Storvum023263t3	1.20517	0.890139	0.533588	1.06066	-0.862608	-1.24483	0.348156	-0.781222	-1.14905	AT2G38530.1	lipid transfer protein 2	Non-specific lipid-transfer protein 2
Storvum023345t1	1.01363	1.38626	0.788638	0.139202	-0.284876	-1.10328	-0.219567	0.029856	-1.74986	AT1G29270.1		Transcription factor bHLH13 like
Storvum023354t1	0.218102	0.521998	-0.0348965	0.746887	-1.31674	-1.47715	1.74663	-0.0120459	-0.392791	AT2G01300.1		PREDICTED: uncharacterized protein LOC107062687
Storvum023608t1	0.327964	0.871224	1.03786	0.483659	-0.436699	-0.838729	1.09968	-0.782335	-1.76262	AT5G38790.1		histone deacetylase HDT1-like
Storvum023691t1	1.01438	1.3699	0.710282	0.800323	-1.12195	-0.810847	0.0494894	-0.944727	-1.06685	AT5G38790.1		PREDICTED: uncharacterized protein LOC107019909
Storvum023789t1	1.44538	1.58297	0.581212	-0.084709	-0.475711	-0.498105	-0.506081	-1.36792	-0.677037	AT1G25330.1	basic helix-loop-helix (bHLH) DNA-binding superfamily protein	---NA---
Storvum023813t1	0.298378	1.49406	-0.125711	1.47908	-0.199416	-0.214089	-0.192975	-1.01636	-1.52297	AT3G23740.1		---NA---
Storvum023912t1	0.377327	0.965337	1.38513	0.915183	-1.37524	-1.07799	0.0458287	-0.198949	-1.03663	AT5G05310.3	TLC ATP/ADP transporter	nadh-ubiquinone oxidoreductase chain 2
Storvum023932t2	0.552143	0.943873	0.283086	1.28268	0.167371	-0.141797	0.0352945	-1.28384	-1.83881	AT2G23440.1		protein transport protein SEC31-like
Storvum023979t2	1.03286	1.45793	0.617734	0.30004	-1.04702	-0.756673	0.553109	-0.950878	-1.20711	AT2G35730.1	Heavy metal transport/detoxification superfamily protein	Protein SODIUM POTASSIUM ROOT DEFECTIVE 1 like
Storvum024011t1	0.620982	1.01965	0.854187	0.277181	-1.27282	-1.49461	1.10884	-0.736866	-0.376543	AT4G09890.1	Protein of unknown function (DUF3511)	hypothetical protein A4A49_07365
Storvum024070t1	1.10721	0.464826	0.736166	0.0765002	-0.685872	-1.08589	1.17226	-0.058044	-1.72716	AT2G01300.1		mediator of RNA polymerase II transcription subunit
Storvum024117t1	0.935174	0.885984	-0.726303	0.931349	-0.892384	-0.115286	1.19752	-0.757015	-1.45904	NA	NA	---NA---
Storvum024145t1	0.573258	0.986268	0.747464	0.417146	-1.07004	-1.07254	1.32186	-0.71529	-1.18813	AT1G05260.1	Peroxidase superfamily protein	peroxidase 3-like
Storvum024295t1	2.02663	0.154432	0.739287	0.184826	-1.15767	-0.483659	0.187634	-0.428744	-1.22274	AT2G24880.1	Plant self-incompatibility protein S1 family	---NA---
Storvum024402t1	1.0773	0.987464	-0.331289	0.856324	0.53112	-0.732345	0.426516	-1.2364	-1.57869	AT5G66816.1		precursor of CEP9-like
Storvum024572t1	0.319072	1.45703	1.33757	0.647876	-0.693502	-1.30819	-0.67117	-0.137524	-0.951172	AT5G24510.1	60S acidic ribosomal protein family	60S acidic ribosomal protein P1-like
Storvum024642t3	0.500378	0.748322	0.597114	1.06724	-0.341726	-0.613079	0.886731	-0.993411	-1.85157	AT3G58110.2		---NA---
Storvum024699t1	0.118891	1.81842	0.158377	0.195584	0.348419	-0.535421	0.60904	-1.07749	-1.63582	AT1G06340.1	Plant Tudor-like protein	DUF724 domain-containing protein 3-like
Storvum024703t1	1.24641	0.479566	0.187291	1.47566	-1.12574	-1.17669	0.413443	-0.917409	-0.582534	AT5G03890.1		Cold shock domain-containing protein 3
Storvum024842t1	1.02775	-0.780707	-0.95837	1.41892	-0.750691	-0.918623	1.11059	-0.687025	0.538164	ATMG00810.1	DNA/RNA polymerases superfamily protein	uncharacterized mitochondrial protein AtMg00810-like
Storvum025037t1	1.2385	0.727959	0.310101	1.23581	-0.539239	-0.593135	0.292505	-1.25405	-1.41845	AT2G45180.1	Bifunctional inhibitor/lipid-transfer protein/seed storage 2S albumin superfamily protein	14 kDa proline-rich protein DC2.15-like
Storvum025094t1	1.10168	1.3112	0.614839	0.726831	-0.590982	-0.982403	-0.634528	0.0165197	-1.56316	AT3G01920.1	DHBP synthase RibB-like alpha/beta domain	PREDICTED: uncharacterized protein LOC104120188
Storvum025158t1	0.590353	0.916177	0.558925	1.44883	-0.56099	-0.357617	0.194374	-1.27669	-1.51337	AT3G29370.1		Transcription factor like
Storvum025227t1	1.1407	1.1307	0.18346	1.16409	-0.858806	-1.01434	0.311217	-0.866341	-1.19068	AT2G21045.1	Rhodanese/Cell cycle control phosphatase superfamily protein	rhodanese-like domain-containing protein 19, mitochondrial
Storvum025280t1	1.4368	-0.158521	0.398867	0.119127	-0.393297	-1.01514	1.56308	-0.654723	-1.2962	AT1G74800.1	Galactosyltransferase family protein	---NA---
Storvum025395t1	0.0614307	1.07626	1.90003	-0.812329	-0.773264	-1.16534	0.525673	-0.353501	-0.458956	AT3G20340.1		Centrosomal protein
Storvum025409t1	0.65157	0.638991	0.28481	1.19661	0.650667	-1.21005	0.308549	-0.763935	-1.7572	AT5G50720.1	HVA22 homologue E	HVA22-like protein e
Storvum025414t1	-0.0939704	-1.686	0.686473	1.21288	-0.957822	-0.515475	1.22766	0.567107	-0.440852	AT5G51800.1	Protein kinase superfamily protein	---NA---
Storvum025450t1	-0.997424	0.182602	0.726749	1.71158	0.354532	-1.59642	0.162085	-0.848822	0.305118	AT5G56130.1	Transducin/WD40 repeat-like superfamily protein	THO complex subunit 3
Storvum025462t1	0.900897	0.642514	1.33916	0.784185	0.024905	-0.788196	-0.210517	-1.15274	-1.54021	NA	NA	---NA---
Storvum025663t2	2.08038	-0.827963	0.934087	-0.221596	-0.655493	-0.208021	0.444371	-1.08894	-0.456825	AT5G46070.1	Guanylate-binding family protein	guanylate-binding protein 1-like
Storvum025775t1	0.745105	1.96405	-0.22733	0.524612	-0.816902	-0.191232	0.208024	-0.904021	-1.30231	AT5G25570.2		Kinectin like
Storvum025834t1	0.594795	1.34345	0.0240412	0.755989	-1.00348	-0.320629	1.06083	-1.12599	-1.32901	AT2G41970.1	Protein kinase superfamily protein	probable protein kinase At2g41970
Storvum025897t1	0.616347	1.12427	0.0752833	1.79029	-0.385329	-0.99503	-0.327507	-0.728141	-1.17018	AT1G54120.1		PREDICTED: uncharacterized protein LOC107818456
Storvum026066t2	1.62087	1.39099	0.200913	-0.22141	0.0434838	-0.555365	-0.317165	-0.533519	-1.6288	AT2G39240.1	RNA polymerase I specific transcription initiation factor RRN3 protein	NBS-LRR resistance protein-like protein
Storvum026467t1	0.165506	1.56299	0.820364	0.539922	-0.0374766	-1.34545	0.509712	-0.96751	-1.24806	AT3G59770.3	sacI homology domain-containing protein / WW domain-containing protein	---NA---
Storvum026634t1	0.645749	1.66137	0.602533	0.72592	-0.346809	-1.28373	-0.171204	-0.44057	-1.39327	AT1G13620.1		root meristem growth factor 1-like
Storvum026759t1	0.370375	1.42073	1.08839	0.639099	0.0532848	-1.25807	-0.10462	-0.777081	-1.43211	AT2G42110.1		Kinesin-like protein
Storvum026836t1	2.0299	0.62396	0.266158	0.106036	-1.02407	0.0460426	-0.215228	-0.354535	-1.47826	AT4G33530.1	K+ uptake permease 5	---NA---
Storvum026891t1	1.15883	0.616414	0.218956	0.838531	-1.3452	-1.16644	1.07729	-0.36933	-1.02905	AT1G56220.3	Dormancy/auxin associated family protein	auxin-repressed 12.5 kDa protein-like
Storvum026939t1	1.90216	0.787457	0.850433	-0.0422336	-1.17386	-0.160546	-0.923267	-0.544012	-0.696126	AT1G43760.1	DNAse I-like superfamily protein	PREDICTED: uncharacterized protein LOC104103336, partial
Storvum027053t1	0.682378	0.814179	-0.635732	0.69456	-1.46046	0.176029	1.03075	-1.62843	0.326721	AT5G48290.1	Heavy metal transport/detoxification superfamily protein	heavy metal-associated isoprenylated plant protein 47-like
Storvum027113t1	0.619022	0.586765	0.39153	1.21303	-0.0252658	-0.076946	0.435431	-2.07707	-1.06649	AT2G22240.2	myo-inositol-1-phosphate synthase 2	---NA---
Storvum027121t1	2.02644	0.784888	0.221844	-0.0843415	-1.28093	-0.949032	0.296333	-0.311899	-0.7033	AT4G28070.1	AFG1-like ATPase family protein	putative F-box protein At3g25750
Storvum027133t4	0.362784	0.868474	1.01455	1.27238	-1.34328	0.469311	-0.855613	-0.660232	-1.12838	AT1G50010.1	tubulin alpha-2 chain	alpha-tubulin
Storvum027141t1	0.945541	0.588258	0.648918	0.575778	0.523496	-0.412457	0.38521	-1.38442	-1.87033	AT2G35450.1	catalytics;hydrolases	Pleiotropic drug resistance protein 1
Storvum027296t1	0.746386	1.28692	0.895571	0.972037	-0.680594	-0.84686	0.00473907	-1.06357	-1.31463	AT5G19190.1		PREDICTED: uncharacterized protein LOC102594885
Storvum027316t1	0.31907	1.01916	1.00604	0.206924	-0.625475	-1.46694	0.992112	0.0570455	-1.50794	AT2G03830.1		probable root meristem growth factor 8
Storvum027343t1	-0.0862336	0.329264	0.382409	0.145895	-0.552518	-1.46495	1.44031	1.16226	-1.35644	AT5G34882.1	Protein of unknown function (DUF784)	---NA---
Storvum027553t1	0.40597	1.04804	1.10383	1.48216	-0.806056	-0.734632	-0.651157	-0.912526	-0.935639	AT4G34760.1	SAUR-like auxin-responsive protein family	auxin-induced protein 15A-like
Storvum027591t1	1.0567	-0.0651693	1.27052	1.22033	-1.00472	-1.24178	0.117491	-0.292894	-1.06049	AT2G38120.1	Transmembrane amino acid transporter family protein	auxin transporter-like protein 4
Storvum027685t2	0.283523	0.536855	1.2876	0.872773	0.883843	-1.32017	-0.391455	-0.747224	-1.40575	AT2G01505.1	CLAVATA3/ESR-RELATED 16	CLAVATA3/ESR (CLE)-related protein 16-like
Storvum027781t1	0.35221	0.324965	-0.460167	1.51889	-0.931436	-1.5561	1.31152	-0.0728837	-0.486995	AT3G11600.1		ras guanine nucleotide exchange factor P-like
Storvum027966t2	1.96229	-0.272532	0.893926	-0.804168	0.160615	-1.0464	0.554875	-0.449103	-0.999502	AT1G24090.1	RNase H family protein	Hop-interacting protein THI034
Storvum028016t1	0.878262	0.405368	0.630137	0.763053	-0.0913958	0.139847	0.606726	-1.40343	-1.92857	AT5G59120.1	subtilase 4.13	subtilisin-like protease SBT1.9
Storvum028018t1	1.39137	0.78812	0.378119	0.786722	-0.694828	-0.712446	0.58079	-0.95593	-1.56191	NA	NA	PREDICTED: uncharacterized protein LOC108947473
Storvum028019t1	0.514567	1.92471	0.493113	0.581381	-0.174805	-0.647343	-0.333022	-0.947406	-1.41119	AT3G13520.1	arabinogalactan protein 12	hypothetical protein CQW23_04178
Storvum028054t1	0.783695	1.36075	-0.217465	1.28891	-1.18918	-0.988575	-0.394919	-1.05351	0.410294	AT3G13520.1	arabinogalactan protein 12	hypothetical protein CQW23_04178
Storvum028165t1	0.958542	0.934058	0.643342	0.344948	-1.30619	-0.812999	1.18367	-0.884852	-1.06052	AT3G19890.1	F-box family protein	---NA---
Storvum028497t7	0.697562	1.01316	0.103435	0.915303	-1.11181	-1.30156	1.2042	-0.53373	-0.98656	NA	NA	---NA---
Storvum028553t1	1.52138	0.802192	0.511818	0.727828	0.154257	-1.14957	-0.217274	-0.957395	-1.39323	AT4G16447.1		hypothetical protein A4A49_11175
Storvum028654t1	0.861955	1.31507	1.28576	0.287985	-0.761565	-0.725671	0.0474509	-1.07677	-1.23421	AT3G07870.1	F-box and associated interaction domains-containing protein	F-box protein At5g49610-like
Storvum028664t1	0.301181	1.12563	1.08661	0.87087	-1.15506	-1.0778	0.544842	-0.362443	-1.33382	AT2G40170.1	Stress induced protein	em protein H5
Storvum028720t1	1.0815	0.192194	0.713217	1.09812	0.516772	-0.0442562	-0.56326	-1.56692	-1.42736	NA	NA	PREDICTED: uncharacterized protein LOC102591099
Storvum028721t1	0.71888	1.13899	0.864839	0.523529	-1.06039	-1.16629	0.907133	-0.974726	-0.951974	AT2G40320.1	TRICHOME BIREFRINGENCE-LIKE 33	protein trichome birefringence-like 33
Storvum028844t1	0.978792	1.3803	0.00914057	0.2087	0.203422	-0.131193	0.436838	-1.34054	-1.74546	AT5G25900.1	GA requiring 3	Decaprenyl diphosphate synthase
Storvum029018t1	1.39522	0.391307	0.804538	-0.00485716	0.359348	0.102514	0.0727944	-1.2154	-1.90546	AT2G34330.1		MuDR family transposase containing protein
Storvum029339t2	0.635491	1.16514	1.13344	0.791751	0.0274081	-0.578154	-0.4123	-1.32849	-1.43428	NA	NA	---NA---
Storvum029548t1	0.906255	0.823496	0.760198	0.253019	0.274446	-1.4538	0.851363	-1.08727	-1.32771	AT4G21520.1	Transducin/WD40 repeat-like superfamily protein	---NA---
Storvum029635t1	0.583544	0.555631	0.716902	1.26856	-0.180565	-0.649914	0.651233	-1.3992	-1.54619	AT5G39860.1	basic helix-loop-helix (bHLH) DNA-binding family protein	transcription factor PRE1-like
Storvum029660t1	0.625855	0.837516	0.610325	1.15105	0.339816	-1.36648	0.053646	-0.539052	-1.71267	AT2G46225.2	ABI-1-like 1	hypothetical protein A4A49_25704
Storvum029670t1	0.612169	1.23483	1.14311	0.763178	0.120999	-1.19336	-0.758268	-0.543432	-1.37922	AT1G10330.1	Tetratricopeptide repeat (TPR)-like superfamily protein	putative pentatricopeptide repeat-containing protein At1g10330
Storvum029733t1	1.29642	1.4608	0.623207	0.206275	-0.0774157	-0.447185	-0.494988	-1.2189	-1.34822	NA	NA	---NA---
Storvum029845t1	-0.999018	-0.784395	1.61711	0.214737	0.279335	-1.07169	1.42268	-0.68911	0.0103481	AT5G40100.1	Disease resistance protein (TIR-NBS-LRR class) family	TMV resistance protein N-like
Storvum030023t1	0.26039	-0.309256	1.86664	0.642272	-0.358872	-1.41707	0.812523	-0.854781	-0.64185	NA	NA	---NA---
Storvum030267t1	-0.0213458	1.11873	1.694	0.052986	-1.27717	-1.05838	0.535707	-0.140381	-0.904148	AT2G45220.1	Plant invertase/pectin methylesterase inhibitor superfamily	probable pectinesterase/pectinesterase inhibitor 17
Storvum030346t1	1.74824	-0.28824	-0.511609	0.745484	-1.10356	0.243296	1.0151	-0.808721	-1.03999	AT4G04510.1	cysteine-rich RLK (RECEPTOR-like protein kinase) 38	---NA---
Storvum030374t3	0.166193	1.49315	-0.493965	0.765962	0.909666	-1.20552	0.434946	-0.648635	-1.4218	AT1G77510.1	PDI-like 1-2	---NA---
Storvum030419t2	1.33566	0.429253	-0.183674	0.935515	-0.589944	-0.88574	1.0201	-0.388163	-1.67301	AT4G36080.2	phosphotransferases, alcohol group as acceptor;binding;inositol or phosphatidylinositol kinases	---NA---
Storvum030440t1	1.32746	1.73766	0.422422	0.087656	-0.679207	-0.579651	-0.330814	-0.714968	-1.27056	NA	NA	---NA---
Storvum030768t2	1.01721	0.899038	1.49566	0.50428	-0.607666	-0.95066	-0.36766	-0.622868	-1.36733	AT3G11600.1		ras guanine nucleotide exchange factor P-like
Storvum030996t1	1.40208	0.659473	0.31921	0.31141	-1.12547	-1.02596	1.20055	-0.621933	-1.11937	AT1G05260.1	Peroxidase superfamily protein	peroxidase 3-like
Storvum031147t1	-0.663719	1.81501	0.223303	1.51907	-0.599885	-0.340072	-0.486603	-0.489285	-0.97781	AT4G02050.1	sugar transporter protein 7	---NA---
Storvum031383t1	0.49522	1.79765	-0.547331	0.753257	-0.303404	-1.67649	0.488423	-0.565484	-0.441844	AT5G59970.1	Histone superfamily protein	histone h4
Storvum031736t1	0.465982	1.09322	-0.0737272	0.912532	-0.114133	-1.69375	1.10245	-0.514657	-1.17791	AT1G75580.1	SAUR-like auxin-responsive protein family	auxin-induced protein 15A-like
Storvum031806t1	0.49057	0.914768	0.0977027	0.250341	-1.74296	-1.09579	1.54627	0.00884214	-0.469746	AT5G01075.1	Glycosyl hydrolase family 35 protein	PREDICTED: uncharacterized protein LOC102589291
Storvum031862t1	0.925652	0.582379	1.41313	0.42018	-1.17016	-1.00285	0.694959	-1.06703	-0.796253	AT1G73080.1	PEP1 receptor 1	---NA---
Storvum031872t2	0.677305	0.678349	-0.0472375	1.54619	-0.220752	-1.85126	0.282622	-0.00107769	-1.06414	AT3G29370.1		transcription factor PAR1
Storvum031933t2	1.09852	1.2261	0.622117	0.967691	-0.885943	-0.942803	0.0293036	-0.891213	-1.22376	AT1G23965.1		hypothetical protein BC332_08949
Storvum031967t1	0.871432	0.909928	1.82722	-0.282154	-0.37896	-0.451118	-0.216902	-1.10685	-1.1726	AT5G11425.1		---NA---
Storvum032002t1	-0.241906	1.9413	0.411993	0.422192	0.0992853	-1.40726	0.432699	-0.460111	-1.19819	AT1G43760.1	DNAse I-like superfamily protein	putative acyl-activating enzyme 19
Storvum032302t1	1.02562	1.31271	1.06807	-0.220677	-0.369901	-0.626394	-0.167599	-0.164068	-1.85775	AT1G73965.1	CLAVATA3/ESR-RELATED 13	CLAVATA3/ESR (CLE)-related protein 13
Storvum032324t1	0.598592	0.832689	1.13946	0.502098	-1.01343	-0.124405	0.784077	-1.50763	-1.21144	AT4G31690.1	Transcriptional factor B3 family protein	B3 domain-containing protein REM5-like
Storvum032393t1	1.32285	0.495898	0.329943	-0.0413023	0.659032	-0.647658	0.829929	-1.5168	-1.4319	AT3G59690.1	IQ-domain 13	---NA---
Storvum032639t1	0.581844	1.46713	0.650142	0.657175	-0.740617	-1.28937	-0.28975	0.436247	-1.4728	AT2G07599.1		uncharacterized protein LOC109119291, partial
Storvum032753t1	0.719278	-0.196302	1.91875	0.331865	-0.189668	-0.945894	0.0249491	-0.0134617	-1.64951	AT4G19890.1	Pentatricopeptide repeat (PPR-like) superfamily protein	---NA---
Storvum032913t1	0.795161	0.495658	0.167229	1.58535	0.125725	-1.23834	0.446382	-1.24665	-1.13051	AT3G54810.1	Plant-specific GATA-type zinc finger transcription factor family protein	GATA transcription factor 8-like
Storvum032948t1	1.45779	0.791341	0.526908	0.940895	-1.19105	-1.16039	0.169656	-0.529393	-1.00577	AT1G48120.1	hydrolases;protein serine/threonine phosphatases	replication protein A 70 kDa DNA-binding subunit B-like
Storvum033181t1	1.9211	0.651872	0.351629	0.645391	-1.04783	-1.0932	-0.222755	-0.232878	-0.97333	AT1G76480.1		---NA---
Storvum033184t1	1.20532	0.910572	-0.151642	0.787704	-0.685849	-0.658414	1.05707	-1.14358	-1.32118	AT2G38680.1	5'-nucleotidases;magnesium ion binding	---NA---
Storvum033408t1	0.929611	0.81733	1.14813	0.747111	-0.497247	-0.557715	-0.379816	-0.251484	-1.95592	AT1G73670.1	MAP kinase 15	protein ABHD17C-like
Storvum033433t2	1.38129	-0.244227	1.15527	0.644919	-0.0305398	-0.533044	0.317874	-0.975961	-1.71558	AT3G25610.1	ATPase E1-E2 type family protein / haloacid dehalogenase-like hydrolase family protein	---NA---
Storvum033837t1	1.11155	0.0901669	0.701	1.02735	-0.998163	0.658242	0.130299	-1.18346	-1.53698	AT1G55365.1		PREDICTED: uncharacterized protein LOC107858292
Storvum033876t1	0.408018	0.168934	0.393107	0.188428	-1.56458	-1.17747	1.81725	-0.591658	0.357977	AT1G06590.1		---NA---
Storvum034270t1	1.18434	0.801648	0.678154	1.00066	0.266421	-1.17612	-0.385686	-0.980434	-1.38898	AT2G32250.4	FAR1-related sequence 2	fruit-specific protein-like
Storvum034309t1	1.51049	1.01011	1.04862	-0.856526	-0.417743	-0.552184	0.0248099	-0.242439	-1.52514	NA	NA	---NA---
Storvum034445t1	2.01641	0.547259	0.182119	0.617448	-0.182896	-0.806277	-0.129101	-1.12686	-1.11811	AT5G64070.1	phosphatidylinositol 4-OH kinase beta1	---NA---
Storvum034889t1	1.77897	0.678745	1.03772	-0.0606035	-0.497221	-1.36492	-0.209066	-0.357509	-1.00612	AT1G16020.2	Protein of unknown function (DUF1712)	---NA---
Storvum034908t1	0.730542	0.527821	0.677465	0.710117	-1.46259	-0.929	1.3583	-1.00249	-0.610173	AT3G11470.2	4'-phosphopantetheinyl transferase superfamily	late blight resistance protein R1-A-like
Storvum035010t1	1.22073	0.318486	1.16391	1.14579	-0.645749	-0.825394	-0.118741	-0.933493	-1.32555	NA	NA	---NA---
Storvum035035t1	1.82852	0.588806	0.280541	0.578527	-0.550895	-0.140793	0.0786952	-1.23146	-1.43194	AT2G40660.1	Nucleic acid-binding, OB-fold-like protein	---NA---
Storvum035097t1	1.35173	0.801756	0.849162	0.808503	-0.9061	-0.604361	0.106508	-1.02987	-1.37733	AT4G23160.1	cysteine-rich RLK (RECEPTOR-like protein kinase) 8	retrovirus-related Pol polyprotein from transposon TNT 1-94
Storvum035302t1	2.11027	0.312254	0.173911	0.687843	-0.369143	-0.815047	-0.158866	-0.62715	-1.31407	AT5G66600.4	Protein of unknown function, DUF547	Extensin-3
Storvum035467t1	0.932366	0.735006	0.165238	1.27565	-0.0979376	-1.37483	0.461538	-0.489787	-1.60724	AT1G60460.1		hypothetical protein A4A49_18263
Storvum035604t1	0.573932	0.56502	0.887596	0.432216	0.701384	-0.505506	0.589733	-1.71829	-1.52609	AT3G60770.1	Ribosomal protein S13/S15	---NA---
Storvum035608t1	-0.00275985	1.03491	1.71592	0.757669	-0.931569	-0.988269	0.120282	-0.633977	-1.07221	AT4G23160.1	cysteine-rich RLK (RECEPTOR-like protein kinase) 8	uncharacterized mitochondrial protein AtMg00810-like
Storvum035928t1	1.74572	0.227625	0.918969	0.690864	-0.649932	-0.557521	0.0031332	-1.09973	-1.27913	AT1G06650.2	2-oxoglutarate (2OG) and Fe(II)-dependent oxygenase superfamily protein	1-aminocyclopropane-1-carboxylate oxidase homolog
Storvum035985t1	0.95175	1.58003	0.338483	0.742663	-0.43959	-0.806171	0.0998394	-1.10045	-1.36655	AT3G45800.1	Plant protein 1589 of unknown function	---NA---
Storvum036050t1	0.271891	0.26989	-0.0139064	2.23053	-0.365343	-0.849573	0.363486	-0.763559	-1.14341	AT1G78360.1	glutathione S-transferase TAU 21	probable glutathione S-transferase parC
Storvum036104t1	0.460129	-0.0397078	0.764605	0.694081	0.322889	-0.558458	1.32886	-1.7319	-1.2405	AT1G16860.1	Ubiquitin-specific protease family C19-related protein	uncharacterized membrane protein At1g16860-like
Storvum036267t1	1.21265	0.280011	-0.154129	0.0989235	-1.86891	-0.872644	1.29831	0.491562	-0.485773	AT4G26140.1	beta-galactosidase 12	Beta-galactosidase
Storvum036330t1	1.94549	-0.180577	0.122186	0.724739	-0.413198	-0.0118416	0.385569	-1.20196	-1.37041	AT5G09870.1	cellulose synthase 5	Cellulose synthase A catalytic subunit 2 [UDP-forming]
Storvum036553t1	1.718	0.275401	0.394994	0.962991	-0.538719	-0.654938	0.134771	-0.634329	-1.65818	AT3G47950.1	H(+)-ATPase 4	---NA---
Storvum036634t1	0.885937	0.651508	0.57107	0.749617	-0.676883	-0.93236	1.14321	-0.744873	-1.64723	AT5G49555.1	FAD/NAD(P)-binding oxidoreductase family protein	polyphenol oxidase
Storvum036990t1	0.849333	0.993976	1.41053	0.534135	-0.960793	-0.912203	0.188942	-0.975931	-1.12799	AT2G04070.1	MATE efflux family protein	---NA---
Storvum037138t1	-0.411807	1.92791	0.946992	0.547425	-1.05182	-0.589281	-0.299778	0.098278	-1.16791	AT5G27600.1	long-chain acyl-CoA synthetase 7	cytochrome c biogenesis FN (mitochondrion)
Storvum037160t1	0.674104	0.547338	0.64402	0.242719	-0.147143	0.0942289	1.18773	-1.43103	-1.81197	AT2G41970.1	Protein kinase superfamily protein	---NA---
Storvum037264t1	0.178692	0.82195	1.11937	1.10543	-0.612638	-1.22458	0.378853	-0.0968486	-1.67023	AT5G02550.1		hypothetical protein A4A49_07414
Storvum037463t1	1.54877	0.626243	0.855554	0.644708	-0.560306	-0.737102	0.12221	-1.4291	-1.07098	AT4G10613.1	RNA-directed DNA polymerase (reverse transcriptase)-related family protein	---NA---
Storvum037467t1	1.35578	0.879851	0.535894	1.20783	-0.43079	-0.970248	-0.441644	-0.932407	-1.20427	AT1G07460.1	Concanavalin A-like lectin family protein	hypothetical protein BC332_19273
Storvum037517t1	1.98514	-0.695511	0.74484	0.0267082	-0.261651	-1.15079	0.358921	0.199969	-1.20763	AT3G51690.1	PIF1 helicase	ATP-dependent DNA helicase PIF1-like
Storvum037542t1	0.35524	-0.603748	0.672598	0.314526	-0.491209	-1.04365	1.6929	0.637859	-1.53451	AT5G53360.1	TRAF-like superfamily protein	---NA---
Storvum037601t1	0.541015	1.41404	0.365655	1.10442	-0.987414	-0.785192	0.558462	-1.04742	-1.16356	AT5G59710.1	VIRE2 interacting protein 2	hypothetical protein BC332_00837
Storvum037908t1	-0.950909	1.63658	-0.181441	0.727718	-0.177726	-0.758361	1.22793	-0.223651	-1.30014	AT4G16400.1		hypothetical protein A4A49_55295
Storvum037960t1	0.540864	0.420025	-0.111098	0.631394	-2.09858	-0.858417	1.36452	0.291229	-0.179937	AT3G05390.1		Putative retrotransposon protein, identical
Storvum038031t1	0.847078	0.656859	0.919544	1.42834	-0.83213	-0.663566	0.0226105	-1.1517	-1.22703	AT2G36400.1	growth-regulating factor 3	growth-regulating factor 10-like
Storvum038128t3	0.877136	1.26264	0.548353	1.1293	0.0788429	-0.900536	-0.603904	-1.101	-1.29084	AT1G01110.2	IQ-domain 18	---NA---
Storvum038192t1	1.43811	0.987776	0.322841	0.730223	-0.719567	-0.734959	0.433197	-1.39181	-1.06581	AT2G01600.1	ENTH/ANTH/VHS superfamily protein	---NA---
Storvum038229t1	0.552251	0.68506	1.52763	-0.324763	-0.729901	-0.512728	1.11721	-0.978856	-1.3359	AT4G20400.1	JUMONJI 14	---NA---
Storvum038272t1	0.873911	1.26458	0.528975	1.17385	-1.13125	-0.263604	-0.1805	-1.00986	-1.2561	NA	NA	---NA---
Storvum038286t1	1.16437	1.04195	1.00524	0.155258	-0.738294	-0.208552	0.313192	-1.14053	-1.59264	AT4G23400.1	plasma membrane intrinsic protein 1;5	Major intrinsic protein
Storvum038568t2	0.53063	0.0299375	1.20021	0.896841	-1.25143	0.469216	0.637341	-1.50467	-1.00808	AT5G59616.1	Interleukin-1 receptor-associated kinase 4 protein	---NA---
Storvum038582t1	0.85768	0.926182	0.699318	1.26892	-0.163145	-0.736144	-0.134789	-1.47494	-1.24308	AT3G61060.1	phloem protein 2-A13	---NA---
Storvum038596t1	1.55603	-0.233316	-0.404619	-0.150483	-0.590915	-0.491967	1.79668	-0.281685	-1.19973	AT3G53180.1	glutamate-ammonia ligases;catalytics;glutamate-ammonia ligases	protein fluG
Storvum038612t1	0.687292	-0.285335	1.14457	1.18779	0.569168	-1.65347	0.0499711	-1.18161	-0.518374	AT2G18650.1	RING/U-box superfamily protein	probable protein phosphatase 2C 55
Storvum038670t2	0.957895	0.642547	0.159585	1.66464	0.128649	-0.997733	-0.296347	-0.797059	-1.46217	AT2G25180.1	response regulator 12	---NA---
Storvum038777t1	0.784929	0.728276	1.31781	0.834398	-0.0506563	-1.18165	-0.213887	-0.602879	-1.61635	AT1G13570.1	F-box/RNI-like superfamily protein	F-box/FBD/LRR-repeat protein At1g13570-like isoform X1
Storvum038780t1	0.979395	0.861197	0.320921	1.11745	0.0480295	-0.681595	0.266963	-1.16601	-1.74635	NA	NA	---NA---
Storvum038930t1	0.0913765	1.41437	-0.41295	-0.461562	-0.896713	-1.32915	1.42767	0.785161	-0.6182	AT4G01060.3	CAPRICE-like MYB3	---NA---
Storvum039029t1	0.327739	-1.36176	0.224776	1.59627	0.515279	-1.14402	0.981243	-0.925569	-0.21395	ATMG00860.1	DNA/RNA polymerases superfamily protein	Putative gag-pol polyprotein, identical
Storvum039201t1	0.0283252	0.164218	1.16964	0.966353	0.239405	-1.4624	0.555388	0.114681	-1.77561	AT1G53708.1	ROTUNDIFOLIA like 9	DEVIL-like protein
Storvum039326t1	0.629916	1.11587	1.49434	0.750761	-0.418738	-0.909175	-0.858528	-1.21394	-0.590508	AT1G04600.1	myosin XI A	---NA---
Storvum039413t1	1.44437	0.337263	0.385674	0.965641	-0.918413	-0.21959	0.552673	-0.90198	-1.64564	AT1G11990.1	O-fucosyltransferase family protein	---NA---
Storvum039473t1	2.02803	-0.314395	-0.724035	0.644185	-0.562237	-0.729641	0.987503	-0.398489	-0.93092	AT4G13640.2	Homeodomain-like superfamily protein	---NA---
Storvum039633t1	0.496289	1.43808	-1.03397	1.35828	-1.21872	-0.932489	0.38926	0.0179728	-0.514706	AT5G54030.1	Cysteine/Histidine-rich C1 domain family protein	---NA---
Storvum039834t1	0.375499	1.28359	0.677585	1.11945	0.26911	-0.899921	-0.31355	-0.829233	-1.68253	AT4G34760.1	SAUR-like auxin-responsive protein family	auxin-induced protein 15A-like
Storvum040446t1	1.80638	1.17166	-0.212538	0.660295	-1.30898	-0.580303	-0.391158	-0.463328	-0.682036	AT1G13470.1	Protein of unknown function (DUF1262)	---NA---
Storvum040466t1	-0.039077	0.420524	0.518363	1.57588	-1.55328	0.253325	0.2405	0.16709	-1.58333	AT3G24255.1	RNA-directed DNA polymerase (reverse transcriptase)-related family protein	putative ribonuclease h protein
Storvum040502t1	0.47124	0.710405	1.28089	0.867087	-0.734794	-0.886672	0.625846	-0.698393	-1.6356	AT1G17980.2	poly(A) polymerase 1	---NA---
Storvum040870t1	0.36048	0.341023	1.93062	0.678735	-0.151597	-1.42076	-0.443371	-0.153106	-1.14202	ATMG00820.1	Reverse transcriptase (RNA-dependent DNA polymerase)	---NA---
Storvum040896t1	1.0183	0.936299	1.21923	0.571679	-1.27401	-0.830306	0.294586	-0.959	-0.976781	AT2G33630.1	NAD(P)-binding Rossmann-fold superfamily protein	---NA---
Storvum041271t1	1.85812	-0.608941	-0.481783	0.106196	0.427406	-0.00282072	0.903449	-0.595484	-1.60614	AT5G38340.1	Disease resistance protein (TIR-NBS-LRR class) family	---NA---
Storvum041303t1	0.454321	-0.343102	1.92815	1.02535	0.0220179	-1.0576	-0.504561	-0.331568	-1.19301	AT1G52160.1	tRNAse Z3	---NA---
Storvum041352t1	0.904603	1.02273	0.839213	1.2642	-0.517731	-1.01235	-0.282264	-1.11218	-1.10622	AT2G40860.1	protein kinase family protein / protein phosphatase 2C ( PP2C) family protein	phospholipase D Z-like
Storvum041641t1	1.20438	-0.393831	1.04573	0.0482546	0.0671615	-1.94284	0.705291	-0.98043	0.24629	AT1G49640.1	alpha/beta-Hydrolases superfamily protein	---NA---
Storvum041908t1	1.25502	0.361692	0.527795	0.949613	-0.804514	-0.778247	0.861134	-0.795785	-1.57671	AT1G70590.1	F-box family protein	---NA---
Storvum041916t1	1.70126	0.0861831	0.712954	0.533676	-0.478534	-0.828675	0.155308	-0.0483281	-1.83385	AT1G77420.1	alpha/beta-Hydrolases superfamily protein	hypothetical protein CQW23_24614
Storvum042136t1	1.23771	1.03547	0.113045	1.09733	-0.118385	-1.40959	0.124137	-1.04108	-1.03864	AT1G25230.1	Calcineurin-like metallo-phosphoesterase superfamily protein	purple acid phosphatase 3-like
Storvum042543t1	1.65538	0.838281	-0.00518009	0.889903	-1.23191	-0.398388	0.251365	-0.884238	-1.1152	AT5G15150.1	homeobox 3	homeobox-leucine zipper protein HAT7-like isoform X2
Storvum042545t1	0.173419	0.0671399	1.69397	1.3895	-0.929356	-1.25566	0.0562613	-0.537193	-0.658078	AT5G05130.1	DNA/RNA helicase protein	---NA---
Storvum042560t1	1.22129	-0.677759	0.895196	0.857567	0.328582	-0.274909	0.479111	-1.63518	-1.19389	AT5G14210.1	Leucine-rich repeat protein kinase family protein	probable inactive leucine-rich repeat receptor-like protein kinase At3g03770
Storvum042907t1	1.44929	0.615814	1.19853	-0.0933721	-0.828348	-0.6429	0.335329	-0.387099	-1.64724	AT3G48190.1	ataxia-telangiectasia mutated	---NA---
Storvum042960t2	0.390436	1.32713	-0.0144003	0.979976	-1.35747	-0.990907	0.925885	-0.060589	-1.20007	AT1G19410.1	FBD / Leucine Rich Repeat domains containing protein	hypothetical protein A4A49_18263
Storvum043010t1	-0.946795	-0.175582	0.643922	-0.430796	0.103939	-1.03856	2.05674	0.645317	-0.858193	AT4G23320.1	cysteine-rich RLK (RECEPTOR-like protein kinase) 24	receptor-like serine/threonine-protein kinase SD1-8 isoform X2
Storvum043134t1	0.757655	1.16373	0.826041	1.24499	-1.30031	-0.789861	-0.177703	-0.807293	-0.917258	AT1G77550.1	tubulin-tyrosine ligases;tubulin-tyrosine ligases	---NA---
Storvum043215t1	1.24849	0.307178	0.765276	0.389755	0.665973	-1.12555	0.412126	-1.02941	-1.63385	AT3G27503.1	SCR-like 19	---NA---
Storvum043435t1	1.26749	0.578974	0.510698	1.33951	-0.753147	-1.00929	0.184494	-0.796009	-1.32272	NA	NA	---NA---
Storvum043673t1	0.386757	0.393588	1.17094	1.04419	0.496321	-1.30736	0.320099	-1.11129	-1.39324	AT5G12370.2	exocyst complex component sec10	exocyst complex component SEC10-like
Storvum043814t1	-0.0968288	0.938346	0.277179	1.59115	0.320797	-0.677605	0.378677	-1.18561	-1.5461	AT4G34810.1	SAUR-like auxin-responsive protein family	auxin-responsive protein SAUR21-like
Storvum043871t1	1.50925	0.688048	0.527472	0.870122	0.176442	-0.980393	-0.387611	-0.899298	-1.50404	ATCG01280.1	Chloroplast Ycf2;ATPase, AAA type, core	---NA---
Storvum043884t1	1.4707	0.312326	0.493766	0.321151	0.0872436	-0.86861	0.569423	-0.338683	-2.04732	AT2G22240.2	myo-inositol-1-phosphate synthase 2	---NA---
Storvum044315t1	1.57848	0.805009	0.261404	-0.0300516	0.488833	-1.47311	0.312153	-0.525484	-1.41723	AT1G66210.1	Subtilisin-like serine endopeptidase family protein	uncharacterized protein LOC101247440
Storvum044658t1	1.06945	0.229514	-0.44759	1.52024	-0.17386	-0.315745	0.12587	-2.03607	0.0281822	NA	NA	---NA---
Storvum044706t1	0.550726	1.37283	1.08847	0.758629	-0.436665	-0.586659	-0.117867	-1.16307	-1.46639	AT3G61740.1	SET domain protein 14	hypothetical protein JCGZ_06806
Storvum045178t1	0.131322	1.13517	0.624701	0.265586	-1.45148	-0.807757	1.46202	-1.13386	-0.225694	AT4G18930.1	RNA ligase/cyclic nucleotide phosphodiesterase family protein	cyclic phosphodiesterase-like
Storvum045421t2	1.19454	-0.490268	0.288548	1.96561	-0.662417	-1.09358	0.00834849	-0.700425	-0.510351	AT5G23910.1	ATP binding microtubule motor family protein	---NA---
Storvum045422t1	0.447556	1.1575	1.02742	1.03288	0.246738	-0.94655	-0.696245	-0.734029	-1.53527	AT3G51470.1	Protein phosphatase 2C family protein	probable protein phosphatase 2C 47
Storvum045910t1	0.895325	0.196699	0.970645	1.08778	-0.512886	-0.833581	0.794503	-1.11342	-1.48507	AT4G20520.1	RNA binding;RNA-directed DNA polymerases	THO complex subunit 2-like
Storvum046009t1	-0.429873	0.242575	0.2065	-0.211255	-0.0152726	-1.19195	2.17258	0.397255	-1.17056	AT3G57450.1		hypothetical protein BC332_02579
Storvum046359t1	0.352171	0.315887	0.281117	1.07052	-0.0230019	-0.867127	1.31604	-1.95637	-0.489234	AT5G45428.1	conserved peptide upstream open reading frame 24	PREDICTED: uncharacterized protein LOC104241281
Storvum046428t2	0.60768	1.39848	1.15383	0.217267	-0.438419	-0.453602	0.256999	-1.18071	-1.56153	AT4G22160.1		---NA---
Storvum047010t1	1.81193	1.33974	-0.122665	-0.178292	-1.02969	-0.758052	0.332245	-0.41782	-0.977394	AT3G61260.1	Remorin family protein	---NA---
Storvum047335t1	0.877881	0.531917	1.0024	0.771469	-0.137472	-1.52237	0.712696	-1.14011	-1.09642	AT3G27740.2	carbamoyl phosphate synthetase A	60S ribosomal protein L38
Storvum047372t1	0.180446	1.29037	0.793857	1.26294	-0.281038	-0.0912964	-0.416898	-1.18654	-1.55183	AT5G23750.2	Remorin family protein	---NA---
Storvum047425t1	1.0536	0.988172	1.21496	0.673046	-0.676186	-0.985883	-0.103178	-0.764543	-1.39999	AT2G17540.3		---NA---
Storvum047472t1	1.07383	-0.114394	1.00449	1.05891	-1.0162	-0.702922	0.865281	-0.889897	-1.2791	AT1G74600.1	pentatricopeptide (PPR) repeat-containing protein	---NA---
Storvum047575t1	1.34904	0.819595	0.64818	1.08486	-1.09119	-0.737498	-0.230923	-0.459098	-1.38297	NA	NA	Integrase core domain containing protein
Storvum047742t1	1.28904	0.135659	-0.080703	1.66941	-0.957318	-0.227105	0.269484	-1.42613	-0.672335	AT5G56570.1	Leucine-rich repeat (LRR) family protein	---NA---
Storvum047826t1	0.0684463	0.181465	1.01463	0.619461	0.276148	-1.33723	1.44434	-1.01455	-1.25272	AT4G25330.1		PREDICTED: uncharacterized protein LOC109229761
Storvum048486t1	0.769317	0.639899	1.59698	0.846561	-0.508453	-0.995164	-0.207339	-0.800593	-1.34121	AT5G24530.1	2-oxoglutarate (2OG) and Fe(II)-dependent oxygenase superfamily protein	protein DOWNY MILDEW RESISTANCE 6
Storvum048844t1	0.893409	0.236526	1.19496	0.704877	0.321117	-0.807273	0.15587	-0.717931	-1.98156	AT4G18820.1	AAA-type ATPase family protein	Protein STICHEL-like 3
Storvum049235t1	1.1137	0.692616	0.604779	0.980344	-0.815064	-1.18411	0.722195	-0.802608	-1.31185	AT1G68630.1	PLAC8 family protein	---NA---
Storvum049408t1	0.962763	0.905987	1.21248	0.33359	-0.739286	-0.116499	0.245871	-1.16104	-1.64387	AT4G37470.1	alpha/beta-Hydrolases superfamily protein	---NA---
Storvum049942t1	0.728431	0.868606	0.769263	0.818283	0.339616	-1.04651	0.189275	-0.763019	-1.90395	AT1G63460.1	glutathione peroxidase 8	---NA---
Storvum050487t1	-0.072446	0.442075	1.094	1.74805	0.0409923	-0.812121	-0.477728	-0.376827	-1.58599	AT2G30840.1	2-oxoglutarate (2OG) and Fe(II)-dependent oxygenase superfamily protein	---NA---
Storvum051641t1	0.522574	1.18448	0.700338	-0.252213	-0.738761	-0.479654	1.44646	-1.01577	-1.36746	AT5G47530.1	Auxin-responsive family protein	cytochrome b561 and DOMON domain-containing protein At5g47530-like
Storvum051848t1	1.29677	0.814706	0.816047	0.318752	-0.599506	-0.768599	0.509183	-1.83709	-0.550267	AT1G18420.1	Aluminium activated malate transporter family protein	---NA---
Storvum052047t1	1.53037	-0.0316855	-0.913921	0.790762	-0.107472	-0.153584	1.19613	-0.98055	-1.33006	AT3G09470.2	Major facilitator superfamily protein	unc93-like protein 3
Storvum052106t1	0.665471	1.06521	0.805274	0.757222	0.359237	-1.30645	-0.168398	-0.393971	-1.78359	AT1G16480.1	Tetratricopeptide repeat (TPR)-like superfamily protein	---NA---
Storvum052203t1	1.50651	1.1186	0.905225	0.234378	-0.200227	-0.876444	-0.414972	-0.993465	-1.2796	AT1G73970.1		---NA---
Storvum052354t1	0.793851	0.530212	0.468103	1.3312	0.587864	-0.952351	-0.058397	-1.03781	-1.66267	NA	NA	---NA---
Storvum052514t2	1.18252	1.22605	0.610591	0.353468	0.284692	-1.0333	-0.116031	-1.63707	-0.870909	AT4G02070.2	MUTS homolog 6	---NA---
Storvum052538t2	0.949594	1.33476	0.372155	0.879755	-0.861033	-1.26847	-0.346538	0.298056	-1.35827	NA	NA	---NA---
Storvum052839t1	0.388225	0.621121	0.453345	1.292	-0.89663	-0.882618	1.22216	-1.31939	-0.878219	AT5G53610.1	Carbohydrate-binding X8 domain superfamily protein	---NA---
Storvum052924t1	-0.0699451	1.66588	0.0346157	0.442333	-0.379913	-0.679634	0.599458	0.367692	-1.98048	AT5G07680.1	NAC domain containing protein 80	PREDICTED: uncharacterized protein LOC107058554
Storvum053059t1	0.74364	0.599695	1.81264	-0.10883	-0.456603	-0.704942	0.475251	-0.991044	-1.36981	AT3G43890.1	Cysteine/Histidine-rich C1 domain family protein	---NA---
Storvum053235t1	0.827729	1.75588	0.552147	0.371837	-0.725111	-1.58343	-0.155112	-0.2165	-0.827438	AT1G20320.1	Haloacid dehalogenase-like hydrolase (HAD) superfamily protein	ribosomal protein S10
Storvum053325t1	0.784341	0.688212	1.25357	0.475906	0.72295	-1.0799	-0.396883	-0.856629	-1.59156	AT4G03950.1	Nucleotide/sugar transporter family protein	---NA---
Storvum053365t1	0.810082	0.777402	1.37492	-0.43726	-1.27943	-0.892072	1.07547	-0.868304	-0.560799	NA	NA	---NA---
Storvum053535t1	1.50665	-0.842144	0.123254	1.03324	0.574672	-1.17873	0.666315	-0.964585	-0.918679	AT2G23100.1	Cysteine/Histidine-rich C1 domain family protein	---NA---
Storvum053918t1	0.720491	1.04112	0.661437	1.27767	-0.577935	-0.490649	0.0765905	-1.15713	-1.55159	AT4G22753.2	sterol 4-alpha methyl oxidase 1-3	hypothetical protein T459_18455
Storvum054206t1	1.4718	0.184282	0.514055	0.479781	-0.57792	-2.18613	0.385067	-0.195688	-0.0752411	AT1G03930.1	dual specificity kinase 1	---NA---
Storvum054391t1	0.864579	1.04666	0.551481	0.818493	0.512564	-1.22934	-0.0193171	-0.981237	-1.56388	NA	NA	protein FAR-RED IMPAIRED RESPONSE 1-like
Storvum054425t1	1.71803	0.536899	-0.52633	0.301622	-0.814427	-1.25005	1.11546	-0.129842	-0.95136	ATMG00640.1	hydrogen ion transporting ATP synthases, rotational mechanism;zinc ion binding	ATPase subunit 4 (mitochondrion)
Storvum055337t1	1.12576	0.853123	1.62331	-0.232058	-0.473031	-1.39464	-0.106487	-0.413938	-0.982033	AT5G47450.1	tonoplast intrinsic protein 2;3	aquaporin TIP2-3
Storvum055437t1	0.645958	0.987156	0.550657	0.440285	-0.746955	-1.21956	1.39654	-0.972424	-1.08166	ATCG00590.1	electron carriers	---NA---
Storvum055796t1	1.48647	1.24018	-0.275441	0.721463	-1.30684	-0.0231827	0.122694	-0.957408	-1.00794	AT5G24318.2	O-Glycosyl hydrolases family 17 protein	---NA---
Storvum055920t1	0.505839	1.12126	0.503211	0.225704	-0.375119	-0.475298	1.32759	-1.27487	-1.55831	AT5G50300.1	Xanthine/uracil permease family protein	hypothetical protein A4A49_29567
Storvum056097t1	0.881314	0.279854	0.191826	1.75219	-0.518119	-1.53578	0.312053	-0.243385	-1.11995	NA	NA	---NA---
Storvum056727t1	1.03814	1.5151	0.767991	-0.0232761	-0.589744	-0.174268	0.14139	-1.5102	-1.16513	AT5G09350.1	phosphatidylinositol 4-OH kinase beta2	---NA---
Storvum056985t2	-0.292932	-0.762146	1.53711	0.393549	-0.879063	-0.339337	1.0198	0.814479	-1.49146	AT2G38695.1		---NA---
Storvum057207t1	1.20623	1.24902	0.449846	-0.353254	0.36799	-0.495199	0.337023	-0.962366	-1.79929	AT5G06350.1	ARM repeat superfamily protein	---NA---
Storvum058228t1	0.887655	1.29174	0.921808	0.491384	-0.872657	-0.501613	0.139906	-0.613895	-1.74433	AT5G26960.1	Galactose oxidase/kelch repeat superfamily protein	---NA---
Storvum058355t1	0.702654	-0.862421	-0.150568	0.829983	0.488395	-1.10286	1.70043	-0.346928	-1.25869	AT1G43760.1	DNAse I-like superfamily protein	putative acyl-activating enzyme 19
Storvum058396t1	1.19779	1.54713	0.0459857	0.135378	0.0519451	-0.887806	0.428303	-1.20975	-1.30897	AT5G54280.2	myosin 2	---NA---
Storvum058414t1	1.21176	0.734991	1.03437	0.55255	-0.0140089	-0.753436	-0.0201357	-1.0006	-1.74549	AT4G26200.1	1-amino-cyclopropane-1-carboxylate synthase 7	PREDICTED: uncharacterized protein LOC107843201 isoform X1
Storvum058421t1	0.688668	1.1398	0.204762	0.990069	-0.0328618	-0.323084	0.396757	-1.8836	-1.18051	NA	NA	---NA---
Storvum058737t1	1.22198	0.384804	0.123388	0.940362	-0.806309	-1.91873	0.758147	-0.742447	0.0388097	AT4G22100.1	beta glucosidase 2	---NA---
Storvum058947t1	1.32324	0.216806	1.08462	1.03415	-0.948704	-0.379582	-0.0313496	-0.783576	-1.51561	NA	NA	---NA---
Storvum059144t1	1.19403	1.05749	1.45435	-0.499668	0.235463	-0.664952	-0.805302	-0.95528	-1.01613	AT4G27010.1		---NA---
Storvum059776t1	1.33875	0.899144	-0.190873	0.609298	-1.08912	0.111905	-0.314441	0.493016	-1.85768	AT2G36410.3	Family of unknown function (DUF662)	structural maintenance of chromosomes protein 1A-like isoform X2
Storvum059930t1	-0.37971	0.221356	0.589813	1.12861	-0.981115	-1.07431	1.57294	-1.25074	0.173161	AT3G62900.1	CW-type Zinc Finger	---NA---
Storvum059943t1	1.15166	0.552503	0.737223	0.826968	-1.05148	-0.995659	0.835359	-0.688045	-1.36853	AT1G67120.1	ATPases;nucleotide binding;ATP binding;nucleoside-triphosphatases;transcription factor binding	---NA---
Storvum060342t1	1.4153	0.177283	0.749702	0.358189	-0.148313	-1.19709	0.900117	-0.644375	-1.61081	AT3G48195.1	Phox (PX) domain-containing protein	---NA---
Storvum061421t1	0.631647	2.06968	0.440811	0.0656413	-0.468299	-1.52361	-0.206436	-0.390584	-0.618853	NA	NA	---NA---
Storvum061438t1	0.369338	1.42946	0.41906	1.44262	-0.35927	-1.16244	-0.370269	-0.447095	-1.32141	AT3G06210.1	ARM repeat superfamily protein	ubiquitin-conjugating enzyme E2-17 kDa-like
Storvum061491t1	-0.0404254	0.344243	0.33641	1.72376	0.697126	-1.30775	0.378398	-0.762763	-1.369	AT4G24740.1	FUS3-complementing gene 2	---NA---
Storvum061539t1	1.98538	0.0934906	0.0356451	0.377721	-0.153375	0.215071	0.199169	-1.43291	-1.32019	AT3G54530.2		---NA---
Storvum061919t1	1.23789	0.781377	0.97899	0.945892	-0.957863	-1.02696	-0.224522	-0.37923	-1.35558	AT1G06910.1	TRF-like 7	---NA---
Storvum062445t1	1.02358	0.80486	1.00705	0.540895	0.247283	-0.808164	0.0493488	-1.13462	-1.73023	AT5G60600.2	4-hydroxy-3-methylbut-2-enyl diphosphate synthase	---NA---
Storvum062835t1	1.45112	-1.15996	0.220211	0.673169	-0.572281	0.0960314	1.29533	-0.88939	-1.11422	AT1G45248.4	Nucleolar histone methyltransferase-related protein	---NA---
Storvum063077t1	0.0492637	0.797484	1.086	0.570773	0.0530017	-0.764026	0.866869	-0.628872	-2.0305	AT1G11090.1	alpha/beta-Hydrolases superfamily protein	---NA---
Storvum063091t1	1.0093	0.988984	1.58057	0.124458	-0.36942	-0.760272	-0.29808	-0.917349	-1.35819	NA	NA	---NA---
Storvum063872t1	1.81555	0.403865	0.324969	0.199966	-0.30738	-0.668888	0.694856	-1.64214	-0.820799	AT3G14020.1	nuclear factor Y, subunit A6	---NA---
Storvum063952t1	1.50608	0.52257	0.743707	0.727194	-1.15966	-0.959497	0.531851	-0.963293	-0.94895	AT5G47300.1	F-box and associated interaction domains-containing protein	hypothetical protein BC332_18163
Storvum064096t1	0.737465	1.28493	0.344714	0.937461	0.323981	-0.955211	0.0329419	-1.10115	-1.60513	AT3G61640.1	arabinogalactan protein 20	Arabinogalactan peptide 20
Storvum064189t1	1.69144	-0.101413	-0.338017	0.219863	0.704991	-0.0255193	0.665933	-1.24054	-1.57674	NA	NA	---NA---
Storvum065205t1	1.30338	0.853969	-0.00119258	1.22669	-0.357304	-0.903296	0.263592	-0.870456	-1.51538	NA	NA	---NA---
Storvum065341t1	1.35675	0.995074	-0.0024254	0.632064	0.327408	-0.378601	0.072733	-1.45294	-1.55006	AT3G61900.1	SAUR-like auxin-responsive protein family	---NA---
Storvum065353t1	0.608491	0.593838	1.42109	0.561407	-0.591488	-1.40536	0.450397	-0.0868816	-1.55149	AT2G14680.3	myosin heavy chain-related	---NA---
Storvum065982t1	1.60844	1.12659	0.850064	-0.317461	-0.0717299	-0.609897	-0.210745	-0.990344	-1.38492	AT1G32700.2	PLATZ transcription factor family protein	PLATZ transcription factor family protein
Storvum066853t1	0.482147	1.25877	1.2602	-0.0473944	-1.05384	-1.02017	0.862194	-0.570221	-1.17168	AT1G05260.1	Peroxidase superfamily protein	peroxidase 3-like
Storvum066981t1	1.42866	1.34772	0.954509	-0.0920037	-1.00783	-0.349715	-0.277561	-1.01563	-0.98816	NA	NA	---NA---
Storvum067306t1	1.13584	1.15822	1.04873	-0.10854	0.0545008	-0.605697	-0.00475015	-0.951698	-1.72661	AT2G14820.1	Phototropic-responsive NPH3 family protein	BTB/POZ domain-containing protein NPY2
Storvum068968t1	0.385268	-0.228584	0.440033	1.18235	-0.645575	-0.514331	1.68359	-1.29393	-1.00882	AT3G51080.1	GATA transcription factor 6	---NA---
Storvum072067t1	0.629878	1.54748	0.776772	0.869539	-0.74372	-0.598271	-0.108663	-0.951317	-1.4217	AT3G10080.1	RmlC-like cupins superfamily protein	germin-like protein subfamily 3 member 2
Storvum072875t1	1.51393	1.03795	-0.581092	1.14469	-0.169895	-0.480868	-0.170211	-0.97226	-1.32224	AT2G22900.1	Galactosyl transferase GMA12/MNN10 family protein	---NA---
Storvum072996t1	0.458627	1.46035	0.13821	1.43058	-0.575382	-1.01073	-0.397602	-0.0629933	-1.44107	AT3G30768.1		---NA---
Storvum074077t1	1.2314	0.834516	1.05689	0.592908	-0.0362826	-1.01416	-0.12392	-1.12196	-1.4194	AT3G22450.1	Ribosomal L18p/L5e family protein	---NA---
Storvum074493t1	1.19212	1.13315	0.587032	-0.613354	0.270186	-1.03793	0.809591	-1.05078	-1.29001	AT1G30220.1	inositol transporter 2	---NA---
Storvum076323t1	0.415075	1.21787	0.734972	0.984911	-1.49159	-1.14366	0.617816	-0.549101	-0.786293	AT4G34710.2	arginine decarboxylase 2	---NA---
Storvum076634t1	1.22496	1.00446	0.774838	0.40657	-0.171953	-1.21533	0.0602038	-0.319521	-1.76424	AT1G64870.1		---NA---
Storvum078887t1	0.790067	0.64985	1.08528	0.576579	0.74572	-0.496088	-0.522353	-0.986504	-1.84255	AT1G76050.1	Pseudouridine synthase family protein	---NA---
Storvum079658t1	1.4976	-0.0918852	0.689362	0.28378	-1.54826	0.0183817	1.01944	-0.860711	-1.00771	AT4G17250.1		---NA---
Storvum084775t1	1.47201	1.7209	-0.426794	-0.456848	0.101132	-1.16616	0.187961	-0.873785	-0.558414	AT4G15920.1	Nodulin MtN3 family protein	---NA---
Storvum087245t1	-0.0979018	1.4752	1.26341	0.757051	-0.422481	-1.15674	-0.569012	0.0907436	-1.34027	NA	NA	---NA---
Storvum087948t1	0.904679	0.0162752	0.972197	0.561434	-1.30634	-1.52164	1.23565	-0.445532	-0.416728	ATCG00350.1	Photosystem I, PsaA/PsaB protein	photosystem I P700 chlorophyll a apoprotein A1 (chloroplast)
Storvum088832t1	1.64985	0.19257	0.186339	0.893937	-1.17341	-1.20505	0.171672	0.445873	-1.16179	AT5G58410.1	HEAT/U-box domain-containing protein	---NA---
Storvum091799t1	1.33521	0.49624	1.34087	0.649001	-0.244617	-0.905311	-0.508272	-0.711075	-1.45205	AT1G23530.1		---NA---
Storvum096120t1	1.20242	-0.228981	-0.449579	0.178735	-0.257591	-0.130722	1.51423	0.139228	-1.96774	AT3G59410.1	protein kinase family protein	---NA---
Storvum103808t1	1.38478	0.821757	0.596767	0.99223	-0.153987	-0.820396	-0.366492	-0.893636	-1.56102	NA	NA	---NA---
Storvum104802t1	0.300009	1.37281	1.22001	0.61374	0.293864	-1.22343	-0.67196	-0.558195	-1.34686	AT1G06080.1	delta 9 desaturase 1	---NA---
Storvum111939t1	0.180977	1.04487	0.752658	1.68409	-0.794647	-1.1306	-0.12985	-0.447201	-1.1603	AT3G12670.1	CTP synthase family protein	---NA---
Storvum119638t1	0.277569	0.243033	1.05841	1.31635	0.334706	-1.13471	0.334364	-0.691551	-1.73817	AT1G79900.1	Mitochondrial substrate carrier family protein	---NA---
Storvum124678t1	-0.0751695	1.04193	1.59125	0.782705	0.154268	-0.67478	-0.441576	-0.82807	-1.55056	NA	NA	---NA---
Storvum125729t1	0.898852	0.513215	-0.770358	1.24573	-0.438816	-1.04639	0.983452	0.19278	-1.57847	NA	NA	---NA---
Storvum129386t1	0.788172	1.13617	1.09317	-0.245322	0.32552	-0.687017	0.389175	-1.0969	-1.70297	AT2G02690.1	Cysteine/Histidine-rich C1 domain family protein	---NA---

## Sheet: Cluster 4
	Scaled expression									Arabidopsis (TAIR10) BLASTX hit		NCBI non-redundant database BLASTX hit
Accession	Mock.1d	Mock.2d	Mock.3d	A2-J.1d	A2-J.2d	A2-J.3d	A2-O.1d	A2-O.2d	A2-O.3d	AGI locus code	Short description
Storvum000007t1	-0.165737	0.118344	0.524065	-0.675504	-0.0727657	2.38962	-0.811324	-0.658065	-0.648629	AT5G40450.1		titin isoform X13
Storvum000342t1	-0.45046	-0.302537	-0.0605176	-0.71678	0.797332	2.34886	-0.400768	-0.868684	-0.346443	AT3G06880.2	Transducin/WD40 repeat-like superfamily protein	putative E3 ubiquitin-protein ligase LIN
Storvum000373t1	-0.942963	-0.569313	-0.544262	-0.770588	-0.273433	2.36884	0.386141	0.202031	0.143552	AT4G30110.1	heavy metal atpase 2	cadmium/zinc-transporting ATPase HMA3-like isoform X2
Storvum000442t1	-0.205802	-1.00629	-0.0136237	-0.777629	0.707417	1.94084	0.904865	-0.93788	-0.611898	AT2G47000.1	ATP binding cassette subfamily B4	ABC transporter B family member 21-like isoform X2
Storvum000465t1	-0.928508	0.064776	-0.152923	-1.08487	-0.0374377	2.28831	-0.554095	-0.189198	0.593951	AT1G74770.1	zinc ion binding	zinc finger protein BRUTUS-like At1g74770 isoform X1
Storvum000615t1	-0.559039	-0.166942	-0.416428	-0.293597	1.32976	2.07809	-0.551096	-0.72248	-0.69827	AT5G36930.2	Disease resistance protein (TIR-NBS-LRR class) family	TMV resistance protein N-like
Storvum000616t1	-0.592938	-0.618756	-0.275898	-0.835637	0.627677	2.3943	-0.0852908	-0.597466	-0.0159926	AT3G01810.3		PREDICTED: uncharacterized protein LOC102601194
Storvum000687t1	-0.743048	-0.755403	-0.79346	-0.957281	1.08947	1.73637	-0.528728	0.030747	0.92133	AT1G14790.1	RNA-dependent RNA polymerase 1	probable RNA-dependent RNA polymerase 1
Storvum000772t1	-0.653454	-0.877256	-0.682727	-0.678818	1.10384	2.13948	-0.0802484	-0.272465	0.00165052	AT5G57110.2	autoinhibited Ca2+ -ATPase, isoform 8	calcium-transporting ATPase 10, plasma membrane-type
Storvum000802t1	-0.618407	-0.563291	-0.718757	-0.97267	1.47173	1.85854	-0.465876	0.0176812	-0.00894632	AT3G21180.1	autoinhibited Ca(2+)-ATPase 9	calcium-transporting ATPase 9, plasma membrane-type
Storvum000949t1	-0.862106	-0.93189	-0.751866	-0.656687	1.04737	2.06912	0.11433	-0.0209679	-0.00730172	AT4G37640.1	calcium ATPase 2	calcium-transporting ATPase 2, plasma membrane-type-like
Storvum000952t1	0.26614	-0.316172	-0.192244	-0.0652196	1.30553	1.71994	-0.270581	-1.05442	-1.39298	AT1G27770.1	autoinhibited Ca2+-ATPase 1	calcium-transporting ATPase 1, chloroplastic
Storvum000990t1	-0.716202	-0.604145	-0.201311	-0.718858	0.650586	2.41237	-0.426973	-0.373059	-0.0224088	AT5G66150.1	Glycosyl hydrolase family 38 protein	alpha-mannosidase
Storvum001065t1	-0.445088	-0.133509	-0.0685696	-0.587462	0.0115239	2.5851	-0.156286	-0.595288	-0.610418	AT1G58370.1	glycosyl hydrolase family 10 protein / carbohydrate-binding domain-containing protein	endo-1,4-beta-xylanase A-like
Storvum001107t1	-0.827762	-0.565568	-0.731148	-0.684362	0.85779	2.11152	-0.639719	-0.130253	0.609506	AT2G01820.1	Leucine-rich repeat protein kinase family protein	receptor-like kinase TMK3
Storvum001180t1	-0.292251	-0.466486	-0.834743	-0.319277	0.644515	2.38979	-0.526346	-0.696096	0.100897	AT2G01820.1	Leucine-rich repeat protein kinase family protein	receptor-like kinase TMK3
Storvum001234t1	-0.215532	0.0249378	0.370275	-1.17725	-0.4987	2.35467	0.163926	-0.720048	-0.302283	AT3G51480.1	glutamate receptor 3.6	glutamate receptor 3.6-like
Storvum001326t1	-0.981893	-0.570381	0.612948	-0.739343	0.383777	1.99483	0.756688	-0.846931	-0.609694	AT5G54650.2	formin homology5	formin-like protein 3
Storvum001328t1	-0.425324	0.00263495	0.181528	-0.720879	0.481114	2.31011	-0.942722	-0.899723	0.013263	AT1G68560.1	alpha-xylosidase 1	alpha-xylosidase 1-like
Storvum001329t1	-0.598255	-0.70806	-0.648994	-0.6995	0.266807	2.18697	-0.53263	-0.274809	1.00847	AT1G68560.1	alpha-xylosidase 1	alpha-xylosidase 1-like
Storvum001374t1	-0.869468	-0.733133	-0.652671	-0.931311	0.904387	2.12136	-0.0489767	-0.0831313	0.292941	AT3G50950.1	HOPZ-ACTIVATED RESISTANCE 1	disease resistance RPP13-like protein 4
Storvum001388t1	-0.808936	-0.830905	-0.367509	-0.542684	0.702118	2.36509	-0.150229	-0.340206	-0.0267408	AT5G54650.2	formin homology5	formin-like protein 3
Storvum001506t1	0.280315	0.466534	-0.374552	-0.695807	-0.827384	2.40371	-0.211958	-0.643592	-0.397266	AT4G35290.1	glutamate receptor 2	glutamate receptor 3.2-like
Storvum001670t1	-0.489632	-0.645452	-0.202203	-0.692184	-0.174698	2.43108	-0.303965	-0.589021	0.666079	AT5G19420.2	Regulator of chromosome condensation (RCC1) family with FYVE zinc finger domain	PH, RCC1 and FYVE domains-containing protein 1 isoform X1
Storvum001678t1	-0.606751	-0.677774	-0.256451	-0.757148	0.789716	2.37793	-0.243656	-0.315583	-0.310282	AT2G28470.1	beta-galactosidase 8	beta-galactosidase 8
Storvum001699t1	-0.637714	-0.56586	-0.454285	-0.809278	-0.313915	2.28327	-0.299981	-0.189229	0.986991	AT1G55020.1	lipoxygenase 1	lipoxygenase
Storvum001742t1	-0.387122	-0.273279	-0.444268	-0.656432	0.140374	2.58185	-0.0307054	-0.583005	-0.347412	AT2G23360.1	Plant protein of unknown function (DUF869)	filament-like plant protein 7 isoform X1
Storvum001951t1	-0.342316	-0.751296	-0.769568	-0.839963	-0.0196004	2.22528	-0.41386	-0.0351671	0.946494	AT5G53020.1	Ribonuclease P protein subunit P38-related	nucleoprotein TPR
Storvum001964t1	-0.507879	0.000618509	0.110467	-0.55022	1.32666	1.92948	-0.474983	-0.781848	-1.05229	AT5G60450.1	auxin response factor 4	auxin response factor 4
Storvum002042t1	-0.787104	-0.537319	-0.841113	-0.984936	0.641889	2.01395	-0.320238	-0.0983303	0.913199	AT1G12380.1		Ribonuclease H-like domain containing protein
Storvum002097t1	-0.507462	-0.961073	-0.498109	-0.558552	0.454203	2.43519	-0.0633353	-0.341516	0.040659	AT2G24370.1	Protein kinase protein with adenine nucleotide alpha hydrolases-like domain	U-box domain-containing protein 52-like isoform X1
Storvum002206t1	-0.584453	-0.452214	-0.645605	-0.601028	0.23814	2.50414	-0.378664	-0.357818	0.277497	AT5G67360.1	Subtilase family protein	subtilisin-like protease SBT1.7
Storvum002289t1	-0.7749	-0.775374	-0.740013	-0.717052	-0.389979	2.21863	0.14236	0.747167	0.28916	AT5G67090.1	Subtilisin-like serine endopeptidase family protein	subtilisin-like protease SBT1.9
Storvum002360t1	-0.587037	-0.317138	-0.476979	-0.635223	-0.254714	2.56844	-0.427298	-0.123441	0.253389	AT5G67360.1	Subtilase family protein	subtilisin-like protease SBT1.7
Storvum002443t1	-0.240502	-0.469036	-0.305748	-0.677708	0.376329	2.22793	0.772225	-1.00101	-0.682478	AT1G55180.1	phospholipase D alpha 4	phospholipase D alpha 4
Storvum002530t1	-0.864467	-0.727405	-0.506404	-0.727741	0.904485	2.10638	-0.637246	-0.0689246	0.521328	AT1G26150.1	proline-rich extensin-like receptor kinase 10	proline-rich receptor-like protein kinase PERK9
Storvum002617t1	-0.318859	-0.707537	0.0298551	-0.537562	0.534126	1.62731	1.39793	-1.30365	-0.721617	AT1G05020.1	ENTH/ANTH/VHS superfamily protein	clathrin coat assembly protein AP180-like
Storvum002663t1	0.292516	-1.10086	-0.315904	0.139821	-0.238628	2.35591	0.226307	-0.656668	-0.702499	AT5G07740.1	actin binding	formin-like protein 20
Storvum002826t1	-0.843968	-0.666609	-0.510843	-0.675457	0.428569	2.1732	-0.652294	-0.133686	0.881087	AT1G55850.1	cellulose synthase like E1	cellulose synthase-like protein E6
Storvum003156t1	-1.01751	-0.64163	-0.59335	-1.00826	0.457262	2.0731	-0.281633	0.29853	0.713493	AT2G16750.1	Protein kinase protein with adenine nucleotide alpha hydrolases-like domain	calmodulin-binding receptor-like cytoplasmic kinase 2
Storvum003183t1	-0.852007	-0.699937	-0.374024	-0.881192	0.316774	2.21116	-0.333399	-0.231924	0.84455	AT3G15730.1	phospholipase D alpha 1	phospholipase D alpha 1-like
Storvum003234t1	-0.575214	-0.20452	-0.11376	-0.661442	0.196283	2.19838	0.892304	-0.797976	-0.934059	AT3G25620.2	ABC-2 type transporter family protein	ABC transporter G family member 21
Storvum003235t1	-0.68349	-0.432496	-0.406393	-0.816552	0.301209	2.42568	-0.700132	0.143313	0.168866	AT2G36570.1	Leucine-rich repeat protein kinase family protein	leucine-rich repeat receptor-like protein kinase PXC1
Storvum003254t1	-1.03364	-0.635349	0.0434546	-0.860194	1.12065	1.95375	-0.268454	-0.703148	0.382928	AT4G36870.2	BEL1-like homeodomain 2	BEL1-like homeodomain protein 4
Storvum003274t1	-0.501254	-0.668173	-0.253795	0.133723	-0.549493	2.57182	-0.396134	0.0440303	-0.380722	AT1G75260.1	oxidoreductases, acting on NADH or NADPH	flocculation protein FLO11
Storvum003287t1	-0.458125	-0.470085	-0.377211	-0.557695	0.438802	2.53981	-0.289097	-0.567436	-0.258966	AT5G19670.1	Exostosin family protein	probable glycosyltransferase At3g07620 isoform X1
Storvum003339t1	-0.943537	-0.465209	-0.746746	-0.685789	1.36001	1.60265	-0.604262	-0.453378	0.93626	AT1G10390.2	Nucleoporin autopeptidase	nuclear pore complex protein NUP98B-like isoform X3
Storvum003341t1	-0.991775	-0.319818	-0.535533	-1.01438	0.672309	2.14478	-0.407963	-0.146307	0.598687	AT1G09910.1	Rhamnogalacturonate lyase family protein	rhamnogalacturonate lyase-like isoform X2
Storvum003421t1	-0.299658	-0.118173	0.0719824	-0.385796	0.354297	2.42038	-0.603074	-0.296903	-1.14306	AT3G15990.1	sulfate transporter 3;4	probable sulfate transporter 3.4
Storvum003536t1	-0.774041	-0.570386	-0.0151307	-0.13646	0.204307	2.54064	-0.260906	-0.449662	-0.538358	AT3G51895.1	sulfate transporter 3;1	sulfate transporter 3.1-like
Storvum003571t1	-0.78107	0.299695	-0.719457	-1.07002	-0.238951	2.20057	-0.451607	0.0307307	0.730113	AT5G41410.1	POX (plant homeobox) family protein	homeobox protein BEL1 homolog
Storvum003581t1	0.275864	0.171765	0.053199	0.0307836	0.873789	1.84158	-0.698636	-1.2911	-1.25724	AT1G68400.1	leucine-rich repeat transmembrane protein kinase family protein	probable inactive receptor kinase At2g26730
Storvum003656t1	-0.518507	-0.802911	0.0499149	-0.339432	1.80223	1.4559	-1.19798	-0.0443047	-0.404923	AT2G23770.1	protein kinase family protein / peptidoglycan-binding LysM domain-containing protein	protein LYK5-like
Storvum003747t1	0.13785	-0.279573	-0.0251556	-0.704254	0.870332	2.18233	-0.283939	-0.999636	-0.897951	AT1G09890.1	Rhamnogalacturonate lyase family protein	probable rhamnogalacturonate lyase B isoform X1
Storvum003771t1	-0.562537	-0.062686	-0.41016	-0.916569	0.653739	2.33549	-0.624202	-0.603064	0.18999	AT2G13610.1	ABC-2 type transporter family protein	ABC transporter G family member 5
Storvum003887t1	-0.474855	-0.411572	-0.611341	-0.712954	-0.0210238	2.54915	-0.156168	-0.386453	0.225212	AT1G70370.2	polygalacturonase 2	polygalacturonase-1 non-catalytic subunit beta-like
Storvum003911t1	-0.564504	-0.482822	-0.366823	-0.721451	0.443061	2.46197	-0.651719	-0.286792	0.169082	AT1G73680.1	alpha dioxygenase	alpha-dioxygenase 2
Storvum004016t1	-0.591298	-0.304479	-0.374898	-0.749294	0.478694	2.43796	-0.600786	-0.520868	0.224968	AT3G25560.1	NSP-interacting kinase 2	protein NSP-INTERACTING KINASE 2-like
Storvum004082t1	0.0186875	0.0464009	0.601748	-0.629114	0.956818	1.43352	-1.46197	0.429394	-1.39548	AT1G21280.1		retrovirus-related Pol polyprotein from transposon TNT 1-94
Storvum004158t1	-0.933839	0.746787	0.338565	-1.06434	0.346976	2.05866	-0.155383	-0.820122	-0.517306	AT5G11540.1	D-arabinono-1,4-lactone oxidase family protein	L-gulonolactone oxidase 3
Storvum004311t1	-0.529693	-0.151812	0.791402	-0.859415	0.237694	2.26022	-0.527972	-0.877492	-0.342936	AT1G32900.1	UDP-Glycosyltransferase superfamily protein	granule-bound starch synthase 1, chloroplastic/amyloplastic
Storvum004392t1	-0.226124	-0.231327	-0.18388	-0.429828	-0.382973	2.65264	-0.422452	-0.471735	-0.304322	AT2G17650.1	AMP-dependent synthetase and ligase family protein	probable acyl-activating enzyme 1, peroxisomal
Storvum004455t1	-0.668139	-0.41356	-0.283907	-0.923817	0.779316	2.26852	0.322222	-0.60058	-0.48006	AT5G58300.2	Leucine-rich repeat protein kinase family protein	probable inactive receptor kinase At5g58300
Storvum004482t1	-0.37895	-0.336126	0.762155	-1.1475	-0.57205	1.91939	0.611198	-1.16823	0.310108	AT1G29200.2	O-fucosyltransferase family protein	O-fucosyltransferase 8 isoform X2
Storvum004569t1	-0.242411	-0.81604	0.101475	-0.701879	1.12641	2.01668	0.0562184	-1.12159	-0.418861	AT3G52600.1	cell wall invertase 2	apoplastic invertase
Storvum004623t1	-0.970595	-0.285684	-0.405565	-0.602194	-0.0118952	2.38543	-0.578102	-0.162432	0.631037	AT1G73590.1	Auxin efflux carrier family protein	probable auxin efflux carrier component 1b
Storvum004711t1	-0.696723	-0.40152	0.147075	-0.559569	0.357629	2.15116	0.79816	-0.817566	-0.978645	AT5G04960.1	Plant invertase/pectin methylesterase inhibitor superfamily	probable pectinesterase/pectinesterase inhibitor 46
Storvum004878t1	-0.719223	-0.0914578	-0.0220212	-0.976582	0.418425	2.35582	-0.707461	-0.490362	0.232861	AT5G04770.1	cationic amino acid transporter 6	cationic amino acid transporter 6, chloroplastic-like
Storvum004883t1	-0.564657	-0.00296218	0.0322614	-0.575953	-0.146092	2.57783	-0.193329	-0.495438	-0.631662	AT2G36780.1	UDP-Glycosyltransferase superfamily protein	zeatin O-glucosyltransferase-like
Storvum004898t1	-0.464586	-0.873024	0.0686199	-0.533565	-0.046575	2.17334	0.916761	-1.06577	-0.175202	AT1G61080.1	Hydroxyproline-rich glycoprotein family protein	protein diaphanous homolog 1-like
Storvum004925t1	-0.862126	-0.509798	-0.338061	-0.87306	1.08929	2.14431	0.129549	-0.475571	-0.304536	AT5G04960.1	Plant invertase/pectin methylesterase inhibitor superfamily	probable pectinesterase/pectinesterase inhibitor 46
Storvum004928t1	-0.813119	-0.36832	-0.257498	-0.697613	-0.0139951	2.32232	0.739053	-0.840012	-0.0708182	AT3G13840.1	GRAS family transcription factor	nodulation-signaling pathway 1 protein-like
Storvum004956t1	-0.828559	-0.388186	0.0275637	-0.682737	-0.147843	2.33244	-0.623144	-0.476146	0.786612	AT4G38650.1	Glycosyl hydrolase family 10 protein	endo-1,4-beta-xylanase UM03411 isoform X1
Storvum004996t1	-0.331012	-0.292925	-0.277808	-0.413312	-0.267681	2.6626	-0.397541	-0.389831	-0.292485	AT4G31970.1	cytochrome P450, family 82, subfamily C, polypeptide 2	cytochrome P450 82C2-like
Storvum005095t1	-1.21476	0.356076	0.745962	-1.45721	-0.434846	1.71536	-0.292215	-0.116335	0.697974	AT4G38470.1	ACT-like protein tyrosine kinase family protein	serine/threonine-protein kinase STY46-like isoform X1
Storvum005098t1	-0.657744	0.0114641	0.0604165	-0.932821	0.279519	2.41326	0.00100971	-0.36278	-0.812324	AT5G03260.1	laccase 11	laccase-11-like
Storvum005142t1	-0.346077	-0.406069	1.185	-0.475808	1.01558	1.46001	-0.0369177	-1.35691	-1.03881	AT3G24620.1	RHO guanyl-nucleotide exchange factor 8	rho guanine nucleotide exchange factor 8-like
Storvum005176t1	-0.320769	0.0268817	-0.353895	-0.945288	0.422194	2.46272	-0.615727	-0.453504	-0.222611	AT3G45650.1	nitrate excretion transporter1	protein NRT1/ PTR FAMILY 2.7-like
Storvum005196t1	-0.21367	-0.601229	-0.443554	-0.877952	0.258767	2.42711	-0.785625	0.0122266	0.223926	AT1G30760.1	FAD-binding Berberine family protein	berberine bridge enzyme-like 13
Storvum005266t1	-0.527929	0.171233	1.1947	-0.515844	-0.093015	2.054	-0.748022	-0.896339	-0.638782	AT5G09760.1	Plant invertase/pectin methylesterase inhibitor superfamily	probable pectinesterase/pectinesterase inhibitor 51
Storvum005420t1	-0.760154	-1.03375	-0.75822	-0.685633	1.21385	1.91852	-0.177047	-0.0627045	0.345133	AT2G15490.3	UDP-glycosyltransferase 73B4	zeatin O-glucosyltransferase-like
Storvum005423t1	-0.695238	-0.440131	-0.181121	-0.9322	0.299141	2.25697	-0.900272	0.651027	-0.0581798	AT3G05620.1	Plant invertase/pectin methylesterase inhibitor superfamily	putative pectinesterase/pectinesterase inhibitor 22
Storvum005429t1	-0.876384	-0.104071	-0.25222	-0.609647	-0.219364	2.44598	-0.334325	-0.591506	0.541542	AT1G64950.1	cytochrome P450, family 89, subfamily A, polypeptide 5	cytochrome P450 89A2-like
Storvum005438t1	-0.0381616	0.35885	0.0406271	-0.322473	0.353312	2.23106	-0.418701	-1.27019	-0.934321	AT5G19740.1	Peptidase M28 family protein	probable glutamate carboxypeptidase 2
Storvum005453t1	0.297097	0.612632	0.0302666	-1.30264	0.0443797	2.15971	-0.59534	-0.479035	-0.767072	AT4G25650.1	ACD1-like	protochlorophyllide-dependent translocon component 52, chloroplastic
Storvum005535t1	-0.63573	-0.709103	-0.316319	-0.652609	0.254754	2.47144	-0.375893	-0.373371	0.336833	AT5G50300.1	Xanthine/uracil permease family protein	adenine/guanine permease AZG2
Storvum005574t1	-0.424945	-0.584439	-0.46139	-0.710307	0.406471	2.48116	-0.242015	-0.601438	0.136899	AT5G13750.1	zinc induced facilitator-like 1	protein ZINC INDUCED FACILITATOR-LIKE 1-like isoform X1
Storvum005586t1	-1.00455	0.2108	0.0132106	-1.03961	0.994527	2.05861	-0.19629	-0.69533	-0.341371	AT3G60380.1		MICAL C-terminal-like protein
Storvum005593t1	-0.550215	0.0959589	0.845614	-0.888419	-0.521752	2.22328	-0.689317	-0.682214	0.167061	AT3G08040.2	MATE efflux family protein	protein DETOXIFICATION 43
Storvum005644t1	-0.670097	-0.85007	-0.718634	-0.867371	0.856387	1.89629	-0.568826	-0.0294377	0.951764	AT5G24910.1	cytochrome P450, family 714, subfamily A, polypeptide 1	cytochrome P450 714A1-like
Storvum005678t2	-0.53767	-0.28638	-0.482618	-0.688088	-0.0022306	2.34959	-0.761911	-0.402665	0.811976	AT1G60590.1	Pectin lyase-like superfamily protein	polygalacturonase At1g48100-like
Storvum005820t1	-0.161335	-0.40188	-0.0699657	-0.685659	1.34996	2.00672	-0.87066	-0.427196	-0.739984	AT5G04310.1	Pectin lyase-like superfamily protein	probable pectate lyase 5
Storvum005846t1	-0.0714283	-0.26231	-0.0673662	-0.565632	0.785675	2.28333	-0.546966	-1.13966	-0.415638	AT3G19850.1	Phototropic-responsive NPH3 family protein	BTB/POZ domain-containing protein At3g19850-like
Storvum005899t1	-0.612573	-0.183028	-0.322992	-0.928424	-0.306302	2.54752	-0.202685	0.0127304	-0.00424974	AT3G62160.1	HXXXD-type acyl-transferase family protein	acyl transferase 4
Storvum005930t1	-1.11736	-1.41998	0.327368	-1.05688	1.0143	1.39659	0.170499	-0.0231511	0.708614	AT2G12900.1	Basic-leucine zipper (bZIP) transcription factor family protein	CYCLOPS/IPD3-like protein
Storvum005973t1	-0.851291	-0.512437	-0.203731	-0.782149	1.14203	2.14303	0.0141479	-0.398861	-0.550746	AT2G26170.1	cytochrome P450, family 711, subfamily A, polypeptide 1	cytochrome P450 711A1
Storvum006002t1	-0.585127	-0.348989	-0.628819	-0.512206	-0.398212	2.57794	-0.0979614	-0.182368	0.175748	AT1G16390.1	organic cation/carnitine transporter 3	organic cation/carnitine transporter 3-like
Storvum006076t1	-0.314307	-0.351764	-0.272983	-0.488506	0.00590691	2.63724	-0.39535	-0.501141	-0.319092	AT2G20340.1	Pyridoxal phosphate (PLP)-dependent transferases superfamily protein	tyrosine decarboxylase 1-like
Storvum006273t1	-0.876866	0.429747	-0.217725	-0.796546	-0.294224	2.46047	-0.428533	-0.104704	-0.171617	AT3G20015.1	Eukaryotic aspartyl protease family protein	protein ASPARTIC PROTEASE IN GUARD CELL 2-like
Storvum006278t1	-0.764561	-0.326621	0.250019	-0.840438	-0.378457	1.96121	-0.339966	-0.861907	1.30072	AT3G26300.1	cytochrome P450, family 71, subfamily B, polypeptide 34	premnaspirodiene oxygenase-like
Storvum006283t1	-0.671512	-0.584561	-0.62155	-0.638111	0.117551	2.30719	-0.550383	-0.212368	0.853742	AT3G48310.1	cytochrome P450, family 71, subfamily A, polypeptide 22	cytochrome P450 71A22-like
Storvum006285t1	0.0875695	-0.432543	0.0131683	-0.183121	-0.634234	2.50406	-0.398704	-0.969443	0.0132472	AT3G48310.1	cytochrome P450, family 71, subfamily A, polypeptide 22	cytochrome P450 71A4-like
Storvum006287t1	-0.826389	-1.47535	-0.387498	-0.205619	1.80836	0.859254	0.80167	-0.54398	-0.0304421	AT4G02050.1	sugar transporter protein 7	hexose carrier protein HEX6-like
Storvum006354t1	-0.187064	-0.188463	0.830979	-0.631517	-0.475039	2.35503	-0.576301	-0.787901	-0.339724	AT2G26710.1	Cytochrome P450 superfamily protein	cytochrome P450 CYP749A22-like
Storvum006453t1	-0.0816664	0.267025	0.0777535	-0.806907	-0.871537	2.38037	0.262343	-0.521182	-0.706195	AT4G22790.1	MATE efflux family protein	protein DETOXIFICATION 56-like
Storvum006520t1	-0.51623	-0.683458	-0.270469	-0.838954	0.530892	2.38271	0.240141	-0.663	-0.181634	AT4G34880.1	Amidase family protein	putative amidase C869.01
Storvum006525t1	-0.457138	-0.571102	-0.650548	-0.956847	1.20858	2.02092	0.340733	-0.586602	-0.347998	AT3G63470.1	serine carboxypeptidase-like 40	serine carboxypeptidase-like 40
Storvum006583t1	-0.71949	0.0162364	0.115303	-0.606569	-0.91411	2.49136	-0.119152	-0.0631383	-0.200444	AT3G45010.1	serine carboxypeptidase-like 48	serine carboxypeptidase-like
Storvum006632t1	-0.805884	0.203166	-0.608492	-0.760863	0.547448	1.84196	-1.45038	0.63978	0.39327	AT4G23030.1	MATE efflux family protein	protein DETOXIFICATION 49-like
Storvum006642t1	-0.51778	-0.7126	-0.875631	-0.830068	0.0647374	2.35594	0.145065	-0.0639351	0.434274	AT4G36380.1	Cytochrome P450 superfamily protein	3-epi-6-deoxocathasterone 23-monooxygenase
Storvum006742t1	-0.609358	-0.115971	-0.0672685	-0.674239	-0.00757348	2.54532	-0.0230418	-0.271113	-0.776758	AT4G01070.1	UDP-Glycosyltransferase superfamily protein	anthocyanidin 3-O-glucosyltransferase 5-like
Storvum006746t1	-1.25288	-0.912632	-0.105205	-0.666486	0.729444	2.04672	-0.267521	-0.144583	0.573138	AT1G17720.2	Protein phosphatase 2A, regulatory subunit PR55	serine/threonine protein phosphatase 2A 55 kDa regulatory subunit B beta isoform-like isoform X1
Storvum006766t1	-0.916794	-0.166961	0.0957511	-0.116137	0.083878	2.43915	-0.502391	0.0316808	-0.948182	AT1G25510.1	Eukaryotic aspartyl protease family protein	protein ASPARTIC PROTEASE IN GUARD CELL 1-like
Storvum006797t1	-0.89449	-0.859612	-0.420259	-0.902096	1.2668	1.8271	-0.355411	-0.245781	0.583753	AT1G06550.1	ATP-dependent caseinolytic (Clp) protease/crotonase family protein	3-hydroxyisobutyryl-CoA hydrolase-like protein 5
Storvum006819t3	-0.243773	-0.292338	-0.764987	-0.917389	-0.0523307	2.33429	-0.462881	-0.384517	0.783923	AT3G18490.1	Eukaryotic aspartyl protease family protein	protein ASPARTIC PROTEASE IN GUARD CELL 1-like
Storvum006843t1	-0.932276	-0.283025	-0.0393696	-0.577252	-0.488403	2.49042	-0.44514	-0.00261033	0.277654	AT2G41370.1	Ankyrin repeat family protein / BTB/POZ domain-containing protein	regulatory protein NPR5-like
Storvum006865t1	-0.555346	-0.600765	-0.44729	-0.67249	-0.367436	2.43201	-0.242168	-0.25658	0.710064	AT5G42650.1	allene oxide synthase	9-divinyl ether synthase-like
Storvum006918t1	-0.798511	-0.507753	-0.0397377	-0.47675	1.1673	2.1089	-0.00588386	-0.818339	-0.629227	AT3G07070.1	Protein kinase superfamily protein	serine/threonine-protein kinase CDL1-like
Storvum006975t1	-0.697747	-0.658123	-0.609687	-0.655707	0.0367077	2.36899	-0.418081	-0.0635386	0.697186	AT3G23560.1	MATE efflux family protein	protein DETOXIFICATION 18-like
Storvum007020t1	-0.802172	-0.224648	-0.546649	-0.572237	0.767015	2.3872	-0.268707	-0.216831	-0.522972	AT3G57400.1		putative mediator of RNA polymerase II transcription subunit 24
Storvum007026t1	-0.765105	-0.708001	-0.133019	-0.883463	-0.132766	2.29268	-0.622097	0.500332	0.451436	AT4G08250.1	GRAS family transcription factor	nodulation-signaling pathway 2 protein-like
Storvum007085t1	-0.414365	0.142223	0.244112	-0.499201	-0.319769	2.49661	-0.184767	-0.901134	-0.563713	AT5G58090.1	O-Glycosyl hydrolases family 17 protein	glucan endo-1,3-beta-glucosidase 5-like
Storvum007133t2	-0.567261	-0.00182617	-0.134215	-0.824926	0.0346193	2.45502	-0.821968	-0.43442	0.294974	AT1G48100.1	Pectin lyase-like superfamily protein	polygalacturonase At1g48100
Storvum007155t1	-0.142683	-0.618252	-0.588122	-0.279841	0.918546	2.22423	0.136561	-0.796309	-0.854127	AT2G15490.3	UDP-glycosyltransferase 73B4	zeatin O-glucosyltransferase-like
Storvum007170t1	-1.04016	-0.609168	0.105625	-1.00048	0.123265	2.09586	0.0769185	-0.614282	0.862431	AT2G35710.1	Nucleotide-diphospho-sugar transferases superfamily protein	putative glucuronosyltransferase PGSIP8
Storvum007336t1	-0.365384	-0.615313	-0.672153	-0.749617	-0.178638	2.24082	-0.402719	-0.329488	1.07249	AT5G36110.1	cytochrome P450, family 716, subfamily A, polypeptide 1	beta-amyrin 28-oxidase-like
Storvum007467t1	0.895499	-0.371197	0.147327	-0.481224	-1.33905	1.69217	-0.72184	-0.809059	0.987376	AT2G15490.1	UDP-glycosyltransferase 73B4	zeatin O-glucosyltransferase-like
Storvum007474t1	-0.910282	-0.31124	-0.490253	-1.03619	1.51186	1.75997	-0.181798	0.206923	-0.548995	AT1G50420.1	scarecrow-like 3	scarecrow-like protein 3
Storvum007586t1	-0.668163	-0.271253	-0.399939	-0.510676	0.09738	2.55005	-0.615903	-0.365681	0.184181	AT1G71140.1	MATE efflux family protein	protein DETOXIFICATION 14-like
Storvum007590t1	-0.869598	-0.643144	-0.983549	-0.706746	1.1482	1.6991	-0.705646	0.310681	0.750709	AT5G42240.1	serine carboxypeptidase-like 42	serine carboxypeptidase-like 42
Storvum007616t1	-0.552141	-0.386357	-0.469484	-0.600242	-0.241393	2.54157	-0.391131	-0.330811	0.429988	AT5G18280.1	apyrase 2	apyrase-like
Storvum007640t1	-1.06707	-0.260888	0.0696904	-0.961944	0.0796872	2.36512	-0.169142	-0.368906	0.313456	AT2G22590.1	UDP-Glycosyltransferase superfamily protein	putative UDP-rhamnose:rhamnosyltransferase 1
Storvum007645t1	0.222834	-0.615245	0.108349	-0.192792	-0.384104	2.30303	0.357706	-1.30231	-0.497461	AT2G22970.1	serine carboxypeptidase-like 11	serine carboxypeptidase-like 13
Storvum007646t1	-0.21573	0.13405	0.0767397	-0.192546	0.146465	2.40245	-0.733021	-1.16443	-0.453976	AT4G30610.1	alpha/beta-Hydrolases superfamily protein	serine carboxypeptidase 24-like
Storvum007697t1	-0.35149	-0.280781	0.308708	-0.713446	1.49234	1.47631	0.361497	-1.0308	-1.26234	AT3G18180.1	Glycosyltransferase family 61 protein	protein O-linked-mannose beta-1,4-N-acetylglucosaminyltransferase 2-like
Storvum007716t1	-0.553231	-0.504594	-0.37769	-0.813769	-0.161395	2.25499	-0.589241	-0.297895	1.04283	AT3G30390.2	Transmembrane amino acid transporter family protein	probable sodium-coupled neutral amino acid transporter 6
Storvum007731t1	-0.606299	-0.460068	-0.419172	-0.634037	1.01644	2.2021	-0.00178868	-0.972098	-0.125082	AT5G39380.1	Plant calmodulin-binding protein-related	microtubule-associated protein futsch-like
Storvum007751t1	-0.51085	-0.219142	-0.272059	-0.68723	-0.137107	2.60021	-0.218142	-0.563185	0.00750586	AT2G39220.1	PATATIN-like protein 6	patatin-like protein 6
Storvum007772t1	-0.758332	-0.430449	-0.344119	-0.359361	1.41103	2.01083	-0.780977	-0.558017	-0.190606	AT5G27350.1	Major facilitator superfamily protein	sugar transporter ERD6-like 5 isoform X1
Storvum007813t1	-0.659344	-0.535228	-0.374578	-0.716403	-0.561045	2.44961	0.458802	-0.251666	0.18985	AT5G01210.1	HXXXD-type acyl-transferase family protein	uncharacterized acetyltransferase At3g50280
Storvum007829t1	-0.371842	-0.24118	-0.233232	-0.846632	1.30222	2.04456	-0.551932	-0.90067	-0.201299	AT1G27620.1	HXXXD-type acyl-transferase family protein	omega-hydroxypalmitate O-feruloyl transferase
Storvum007880t1	-0.529378	-0.357267	-0.638177	-0.812662	0.1426	2.52591	-0.0508695	0.0624874	-0.34264	AT1G23460.1	Pectin lyase-like superfamily protein	probable polygalacturonase At1g80170
Storvum007892t1	-0.650185	0.67012	0.0138768	-1.00953	-0.128541	2.07449	0.386399	-0.0786211	-1.27801	AT1G31490.1	HXXXD-type acyl-transferase family protein	anthranilate N-benzoyltransferase protein 1
Storvum007897t1	-0.412954	-0.903276	-0.401732	-0.441676	0.232539	2.45812	0.336659	-0.622109	-0.245571	AT2G44280.2	Major facilitator superfamily protein	major facilitator superfamily domain-containing protein 12-like
Storvum007946t1	-0.353726	-0.361436	-0.182243	-0.455892	-0.224497	2.65648	-0.318592	-0.432723	-0.32737	AT3G48310.1	cytochrome P450, family 71, subfamily A, polypeptide 22	premnaspirodiene oxygenase-like
Storvum008052t1	-0.510792	-0.254516	-0.213004	-0.32509	-0.365719	2.57559	0.200474	-0.780417	-0.326523	AT3G23820.1	UDP-D-glucuronate 4-epimerase 6	UDP-glucuronate 4-epimerase 6-like
Storvum008097t1	-0.0910066	-0.235581	-0.431224	-0.990345	0.160431	2.53119	-0.244135	-0.477476	-0.221856	AT4G19160.2		transglutaminase-like and tetratricopeptide repeat-containing protein isoform 2
Storvum008102t1	-0.94572	-0.792147	-0.0813797	-0.907902	0.46487	2.13118	-0.351928	-0.327987	0.811012	AT4G26200.1	1-amino-cyclopropane-1-carboxylate synthase 7	1-aminocyclopropane-1-carboxylate synthase 7-like
Storvum008115t1	-0.425095	-0.354999	-0.483594	-0.608485	-0.291447	2.41141	-0.617554	-0.423224	0.79299	AT1G09750.1	Eukaryotic aspartyl protease family protein	aspartyl protease AED3-like
Storvum008161t1	-0.543582	-0.150682	-0.006505	-0.974725	0.207091	2.22536	-0.677806	-0.837698	0.758544	AT3G56200.1	Transmembrane amino acid transporter family protein	probable sodium-coupled neutral amino acid transporter 6
Storvum008170t1	-0.128934	-0.487046	-0.398799	-0.48868	0.505771	2.47331	-0.406579	-0.879862	-0.189181	AT3G19320.1	Leucine-rich repeat (LRR) family protein	hypothetical protein BC332_25457
Storvum008176t1	-0.308375	-0.779635	-0.409449	-0.632148	0.72569	2.12262	0.767292	-0.792278	-0.693715	AT3G26040.1	HXXXD-type acyl-transferase family protein	acylsugar acyltransferase 3
Storvum008230t1	-1.01388	0.845401	0.452566	-1.09261	-0.682329	1.83834	-0.654215	-0.365595	0.672327	AT1G18740.1	Protein of unknown function (DUF793)	UPF0496 protein
Storvum008252t1	-0.623736	-0.424706	-0.474832	-0.625319	1.50786	1.97075	-0.240984	-0.491986	-0.597047	AT5G37540.1	Eukaryotic aspartyl protease family protein	aspartic proteinase PCS1-like
Storvum008359t1	-0.65234	-0.321515	-0.5106	-0.801381	0.28092	2.45656	-0.640935	-0.018981	0.208268	AT5G42720.1	Glycosyl hydrolase family 17 protein	glucan endo-1,3-beta-glucosidase 7
Storvum008386t3	-0.34749	-0.345883	-0.240578	-0.472088	-0.212185	2.6558	-0.39192	-0.419139	-0.226513	AT3G26040.1	HXXXD-type acyl-transferase family protein	acylsugar acyltransferase 3-like
Storvum008399t1	-0.466749	-0.626471	-0.729946	-0.660853	1.10607	1.97706	-0.918262	-0.284178	0.603329	AT5G57180.2	chloroplast import apparatus 2	protein CHLOROPLAST IMPORT APPARATUS 2-like
Storvum008452t1	-0.0263149	-0.195621	0.458126	-0.360286	0.368343	2.21526	-0.436132	-1.42465	-0.598718	AT2G26980.4	CBL-interacting protein kinase 3	CBL-interacting serine/threonine-protein kinase 3-like isoform X1
Storvum008454t1	-0.693828	0.387953	-0.392532	-0.85329	-0.892205	2.14802	0.0904039	-0.620655	0.826129	AT1G61590.1	Protein kinase superfamily protein	serine/threonine-protein kinase At5g01020
Storvum008473t1	-0.489805	0.430578	-0.0122407	-0.227767	-0.0687358	2.2742	0.0378492	-0.495187	-1.4489	AT1G25530.1	Transmembrane amino acid transporter family protein	lysine histidine transporter-like 6
Storvum008503t1	-0.763866	-0.80042	-0.0101462	-0.709762	1.21277	2.07713	-0.136587	-0.647123	-0.221993	AT3G07070.1	Protein kinase superfamily protein	serine/threonine-protein kinase At3g07070-like
Storvum008567t1	-0.678561	-0.718971	-0.657787	-0.653531	1.67888	1.6324	-0.629974	-0.36189	0.389436	AT1G50430.1	Ergosterol biosynthesis ERG4/ERG24 family	7-dehydrocholesterol reductase
Storvum008573t1	-0.904273	-0.752916	-0.351004	-1.07603	0.210732	2.07345	-0.209301	0.0369243	0.972409	AT3G20300.1	Protein of unknown function (DUF3537)	PREDICTED: uncharacterized protein LOC102604757
Storvum008646t1	-0.0152268	-0.853664	0.964286	0.213807	-0.191869	1.26742	0.379207	-2.09704	0.333082	AT5G22500.1	fatty acid reductase 1	fatty acyl-CoA reductase 3-like isoform X2
Storvum008702t1	-0.920554	-0.440358	0.0560204	-0.656279	1.26104	1.95447	0.204502	-0.795539	-0.663298	AT5G05840.1	Protein of unknown function (DUF620)	PREDICTED: uncharacterized protein LOC102591372
Storvum008722t1	-0.864808	-0.833623	-0.64103	-0.75078	0.159409	2.14649	-0.238154	0.0809687	0.941523	AT5G25220.1	KNOTTED1-like homeobox gene 3	homeobox protein knotted-1-like LET12
Storvum008730t1	-0.722478	-0.945598	-0.0111514	-0.80428	0.313848	2.27222	-0.483586	-0.238989	0.620012	AT1G08980.1	amidase 1	Amidase 1
Storvum008784t1	-0.402701	-0.268885	-0.425307	-0.429126	-0.393068	2.4864	0.304935	-0.979446	0.107194	AT1G11170.1	Protein of unknown function (DUF707)	PREDICTED: uncharacterized protein LOC102578269
Storvum008810t1	-0.61814	-0.414261	0.26031	-0.507034	0.798981	2.20552	-0.820901	-0.969856	0.065384	AT5G09690.2	magnesium transporter 7	magnesium transporter MRS2-I-like isoform X1
Storvum008813t1	-0.559598	-0.733179	-0.574973	-0.581076	-0.0978699	2.42216	-0.508296	0.0462073	0.586629	AT5G05810.1	RING/U-box superfamily protein	RING-H2 finger protein ATL43
Storvum008924t1	-0.744408	-0.652497	-0.284078	-0.773877	1.08059	2.09787	0.361388	-0.704624	-0.380366	AT4G26010.1	Peroxidase superfamily protein	peroxidase 44-like
Storvum008972t1	-0.604439	-1.42726	-1.18974	0.272805	0.660676	1.84551	-0.0809485	0.508449	0.0149472	AT4G19510.1	Disease resistance protein (TIR-NBS-LRR class)	TMV resistance protein N-like
Storvum009083t1	-1.03035	-0.487665	0.528202	-0.410831	1.82746	1.33121	-0.322966	-0.658183	-0.776874	AT2G36270.1	Basic-leucine zipper (bZIP) transcription factor family protein	protein ABSCISIC ACID-INSENSITIVE 5 isoform X1
Storvum009163t1	-0.466143	-0.465884	-0.476551	-0.457532	0.110632	2.6066	-0.475893	-0.301058	-0.0741724	AT1G61820.1	beta glucosidase 46	beta-glucosidase 18-like
Storvum009212t2	-0.862143	-0.71195	0.15194	-0.774824	1.43056	1.73457	0.37499	-0.552145	-0.790999	AT5G09530.1	hydroxyproline-rich glycoprotein family protein	adhesive plaque matrix protein-like
Storvum009366t1	-0.278099	-0.26661	-0.114468	-0.873493	1.00596	2.24759	-0.446963	-0.655368	-0.618547	AT5G08370.1	alpha-galactosidase 2	alpha-galactosidase
Storvum009402t1	-0.242764	-0.355741	-0.464891	-0.361504	-0.634401	1.99564	0.124784	-1.26855	1.20742	AT1G69550.1	disease resistance protein (TIR-NBS-LRR class)	putative disease resistance protein RGA4
Storvum009409t1	-0.279554	-0.0854771	-0.256283	-0.684998	-0.171418	2.51104	-0.65486	-0.710984	0.332529	AT3G54050.2	high cyclic electron flow 1	fructose-1,6-bisphosphatase, chloroplastic-like
Storvum009441t1	-0.450484	-0.424947	0.0785108	-0.476458	0.307439	2.45433	-0.923515	-0.63786	0.072988	AT4G37050.1	PATATIN-like protein 4	patatin-like protein 3
Storvum009470t1	-0.788431	-0.5224	-0.534094	-0.653174	0.478937	2.35655	-0.549267	-0.272695	0.484573	AT2G26560.1	phospholipase A 2A	Patatin-like protein 1
Storvum009503t1	-0.636557	0.0351952	0.0626689	-0.799061	0.627669	2.33923	-0.907419	-0.335316	-0.38641	AT5G19730.1	Pectin lyase-like superfamily protein	probable pectinesterase 53
Storvum009637t1	-0.889897	-0.663437	-0.0745467	-0.736192	0.913729	2.20203	0.213306	-0.59533	-0.369661	AT4G22080.1	root hair specific 14	probable pectate lyase 16
Storvum009656t1	-0.0962493	-0.0610356	0.129339	-0.458425	1.69646	1.48152	-0.53711	-0.879991	-1.27451	AT4G19420.1	Pectinacetylesterase family protein	pectin acetylesterase 8-like
Storvum009709t1	-1.07653	-0.592652	-0.991064	-0.294857	0.333328	2.18308	0.0465617	-0.285966	0.678098	AT4G38660.1	Pathogenesis-related thaumatin superfamily protein	thaumatin-like protein 1
Storvum009788t1	-0.383407	-0.481502	-0.348011	-0.296908	-0.570689	2.19125	-0.340828	-0.919842	1.14994	AT4G18550.1	alpha/beta-Hydrolases superfamily protein	Phospholipase A1-II 1
Storvum009842t1	-0.729913	-0.245464	-0.937866	-0.672792	1.63843	1.6157	-0.636891	-0.447855	0.416653	AT5G15630.1	COBRA-like extracellular glycosyl-phosphatidyl inositol-anchored protein family	COBRA-like protein 4
Storvum009891t1	-0.501557	0.434628	-0.0145314	-0.951591	-0.545543	2.43819	-0.431635	-0.472384	0.0444276	AT1G09380.1	nodulin MtN21 /EamA-like transporter family protein	WAT1-related protein At1g09380-like
Storvum009906t1	-0.305412	-0.396085	-0.69794	-0.141718	-0.0787682	2.42499	-0.376132	-0.963596	0.534662	AT5G58600.1	Plant protein of unknown function (DUF828)	protein PMR5-like
Storvum009968t1	-0.407714	-0.386532	-0.290661	-0.429817	-0.175502	2.65763	-0.257892	-0.394291	-0.315222	AT5G13930.1	Chalcone and stilbene synthase family protein	chalcone synthase
Storvum010010t1	-0.617784	-0.735746	0.0282435	-0.491097	-0.167234	2.4728	0.106647	-0.799631	0.203797	AT5G55250.1	IAA carboxylmethyltransferase 1	indole-3-acetate O-methyltransferase 1-like
Storvum010023t1	-1.17191	-0.106453	-0.258623	-1.22037	0.362342	1.94488	-0.598987	0.180925	0.868188	AT1G47710.1	Serine protease inhibitor (SERPIN) family protein	serpin-ZX-like
Storvum010046t1	-0.371684	0.164037	0.543796	-1.2507	-0.189363	1.92627	-0.732964	-0.963213	0.873824	AT5G42250.1	Zinc-binding alcohol dehydrogenase family protein	alcohol dehydrogenase-like 7
Storvum010073t1	-0.0462736	-0.618816	0.344764	-0.278935	0.935728	2.07022	-0.341558	-1.09512	-0.970004	AT4G30420.1	nodulin MtN21 /EamA-like transporter family protein	WAT1-related protein At4g30420
Storvum010152t1	-0.791166	-0.729233	-0.223107	-0.822791	1.31276	1.98324	0.189476	-0.476922	-0.442256	AT5G09530.1	hydroxyproline-rich glycoprotein family protein	adhesive plaque matrix protein-like
Storvum010286t1	-0.458473	-0.481462	-0.152835	-0.516657	0.351644	2.53655	-0.136033	-0.710233	-0.432497	AT5G57850.1	D-aminoacid aminotransferase-like PLP-dependent enzymes superfamily protein	D-amino-acid transaminase, chloroplastic-like isoform X1
Storvum010302t1	-0.754246	-0.461561	-0.542397	-0.619713	0.740815	2.33041	-0.592277	-0.370132	0.269098	AT5G03980.1	SGNH hydrolase-type esterase superfamily protein	acetylajmalan esterase-like
Storvum010321t1	-0.227123	0.137378	0.184375	-0.514116	0.0671572	2.4209	-0.214029	-0.943454	-0.911083	AT2G37460.1	nodulin MtN21 /EamA-like transporter family protein	WAT1-related protein At2g37460-like
Storvum010351t1	-0.549813	-0.0333132	-0.18152	-0.697489	0.728386	2.38362	-0.397299	-0.519858	-0.732713	AT4G35350.1	xylem cysteine peptidase 1	xylem cysteine proteinase 1-like
Storvum010366t1	-0.175462	-0.00784331	-0.120704	-0.408499	0.330073	2.41864	-0.136963	-0.891988	-1.00725	AT1G06620.1	2-oxoglutarate (2OG) and Fe(II)-dependent oxygenase superfamily protein	1-aminocyclopropane-1-carboxylate oxidase homolog
Storvum010384t1	-0.733646	-0.232287	-0.720337	-0.663288	-0.221155	2.43269	0.0394303	-0.438385	0.536979	AT5G20540.1	BREVIS RADIX-like 4	protein Brevis radix-like 4
Storvum010434t1	-0.778499	-0.932362	-0.765773	-0.308102	1.36022	1.80816	-0.583023	-0.326843	0.526215	AT1G04360.1	RING/U-box superfamily protein	RING-H2 finger protein ATL16-like
Storvum010438t1	-0.591099	-0.670048	-0.574826	-0.572119	1.6873	1.76787	-0.0168825	-0.657579	-0.372618	AT1G10070.2	branched-chain amino acid transaminase 2	branched-chain-amino-acid aminotransferase 2, chloroplastic-like
Storvum010459t1	-0.684951	-0.464864	-0.141951	-0.438039	1.44523	1.29498	1.07303	-0.954163	-1.12927	AT4G25190.1	Family of unknown function (DUF566)	QWRF motif-containing protein 7
Storvum010579t1	-0.337255	-0.140127	0.33986	-0.551099	0.7644	1.89388	0.427558	-0.866784	-1.53043	AT1G68170.1	nodulin MtN21 /EamA-like transporter family protein	WAT1-related protein At1g68170-like
Storvum010589t1	-1.2169	0.446871	-0.820506	1.06918	-0.510325	1.84833	-0.721532	-0.435618	0.340507	AT1G13920.1	Remorin family protein	chromodomain-helicase-DNA-binding protein 7-like isoform X1
Storvum010595t1	0.404427	-0.289247	0.0847923	-0.316631	0.608238	2.19292	-0.765267	-1.0995	-0.819728	AT4G25420.1	2-oxoglutarate (2OG) and Fe(II)-dependent oxygenase superfamily protein	gibberellin 20 oxidase 1-like
Storvum010613t1	-0.713664	-0.396732	-0.0828116	-0.682999	0.313028	2.47862	-0.0942947	-0.7796	-0.0415475	AT5G28840.2	GDP-D-mannose 3',5'-epimerase	GDP-mannose 3,5-epimerase 1
Storvum010619t1	-0.640865	0.408567	1.12247	-1.18744	-0.300287	1.65068	-1.33554	-0.0975011	0.379921	AT4G21200.1	gibberellin 2-oxidase 8	Gibberellin 2-beta-dioxygenase 8
Storvum010623t1	-0.348728	-0.562735	-0.459329	-0.909842	-0.409075	2.29803	-0.322597	-0.240972	0.955246	AT4G17370.1	Oxidoreductase family protein	inositol 2-dehydrogenase/D-chiro-inositol 3-dehydrogenase
Storvum010639t1	-0.838832	-0.551734	-0.52191	-0.836167	0.687228	2.34573	-0.0614081	-0.203775	-0.0191297	NA	NA	predicted protein
Storvum010715t1	-0.403781	-0.360928	-0.484757	-0.387432	0.190703	2.53873	-0.612047	-0.658595	0.178104	AT5G53870.1	early nodulin-like protein 1	CT099
Storvum010837t1	-0.551428	-0.429765	-0.22428	-0.432927	0.482475	2.52779	-0.535323	-0.503523	-0.333018	AT5G13930.1	Chalcone and stilbene synthase family protein	chalcone synthase
Storvum010883t1	-0.574483	-0.0401376	0.326627	-0.709205	-0.237283	2.52399	-0.266317	-0.648529	-0.37466	AT3G19000.1	2-oxoglutarate (2OG) and Fe(II)-dependent oxygenase superfamily protein	protein DMR6-LIKE OXYGENASE 2-like
Storvum010884t1	-0.427094	0.405061	0.403637	-0.495188	-0.463006	2.39575	-0.275399	-0.881311	-0.66245	AT4G35160.1	O-methyltransferase family protein	(RS)-norcoclaurine 6-O-methyltransferase-like
Storvum010900t1	-0.334137	-1.28769	-0.397883	-0.401123	0.667968	2.22134	-0.62698	-0.17052	0.329022	AT5G07440.2	glutamate dehydrogenase 2	glutamate dehydrogenase A-like
Storvum010923t1	0.235319	-0.241353	-0.632146	-0.266488	-1.03675	2.11785	0.416776	-1.16435	0.571136	AT3G14130.1	Aldolase-type TIM barrel family protein	peroxisomal (S)-2-hydroxy-acid oxidase GLO4-like isoform X1
Storvum010928t1	-1.16684	0.719559	1.04557	-0.978983	-0.715734	1.56407	-0.987586	0.26222	0.257733	AT4G08300.1	nodulin MtN21 /EamA-like transporter family protein	WAT1-related protein At4g08300-like
Storvum010933t1	-0.156031	0.417715	-0.150943	-0.697771	-0.574657	2.49404	-0.655059	-0.541817	-0.135479	AT1G27660.1	basic helix-loop-helix (bHLH) DNA-binding superfamily protein	transcription factor bHLH110-like
Storvum011001t1	-0.220721	0.260207	-0.14038	-0.773465	-0.000442043	1.98347	0.481958	-1.75295	0.162317	AT2G21280.1	NAD(P)-binding Rossmann-fold superfamily protein	epimerase family protein SDR39U1 homolog, chloroplastic
Storvum011102t1	-0.126583	-0.806893	0.206827	-0.507015	0.529428	1.92195	-1.26147	-0.83445	0.878206	AT3G18440.1	aluminum-activated malate transporter 9	aluminum-activated malate transporter 9-like
Storvum011124t1	-0.877167	-0.0136486	0.018634	-0.682364	-0.669908	2.22493	-0.29851	-0.635776	0.933805	AT3G28050.1	nodulin MtN21 /EamA-like transporter family protein	WAT1-related protein At3g28050-like
Storvum011152t1	-0.838366	-0.205857	-0.609891	-0.799575	1.11845	2.01622	-0.622482	-0.548	0.4895	AT1G64150.1	Uncharacterized protein family (UPF0016)	GDT1-like protein 1, chloroplastic
Storvum011160t1	-0.757018	-0.0777128	0.204638	-0.375804	-0.604586	2.5193	-0.215554	-0.692043	-0.00121902	AT1G20020.1	ferredoxin-NADP(+)-oxidoreductase 2	ferredoxin--NADP reductase, leaf-type isozyme, chloroplastic
Storvum011167t1	-0.844021	-0.624783	-0.699059	-0.789633	0.421788	2.14487	-0.609258	0.239847	0.76025	AT3G21420.1	2-oxoglutarate (2OG) and Fe(II)-dependent oxygenase superfamily protein	protein SRG1
Storvum011178t1	-0.984763	-0.46119	-0.477055	-0.599229	0.71487	2.30069	-0.491237	0.303374	-0.305464	AT1G02170.1	metacaspase 1	metacaspase-3-like
Storvum011190t1	-0.85961	-0.61311	-0.00178627	-0.818771	1.57929	1.69369	-0.424052	0.23101	-0.786664	AT4G03020.2	transducin family protein / WD-40 repeat family protein	LEC14B protein
Storvum011217t3	-0.977294	-0.394133	0.0045281	-0.692729	0.821053	2.1745	-0.756671	-0.547044	0.367789	AT2G36290.1	alpha/beta-Hydrolases superfamily protein	alpha/beta-hydrolases superfamily protein precursor
Storvum011224t1	-0.572529	-0.351061	-0.274116	-0.625979	0.105483	2.55808	-0.474291	-0.525792	0.160204	AT4G35160.1	O-methyltransferase family protein	(RS)-norcoclaurine 6-O-methyltransferase-like
Storvum011244t1	-1.08828	-0.426687	0.250713	-0.995575	-0.520844	2.27875	0.26787	0.0263892	0.207672	AT1G19715.3	Mannose-binding lectin superfamily protein	agglutinin-like isoform X1
Storvum011300t1	-0.774544	-0.628947	-0.522569	-0.767242	0.579878	2.36429	0.137383	-0.441533	0.0532892	AT3G13550.2	Ubiquitin-conjugating enzyme family protein	constitutive photomorphogenesis protein 10
Storvum011309t1	-0.725949	-0.5491	-0.487446	-0.744199	-0.070029	2.23212	-0.460611	-0.251781	1.057	AT1G29660.1	GDSL-like Lipase/Acylhydrolase superfamily protein	GDSL esterase/lipase At1g29670-like
Storvum011323t1	-0.538837	-0.289525	-0.0772715	-0.63694	0.00247058	2.55901	-0.651448	-0.478479	0.111025	AT1G15125.1	S-adenosyl-L-methionine-dependent methyltransferases superfamily protein	probable S-adenosylmethionine-dependent methyltransferase At5g38780
Storvum011400t1	-0.718328	-0.463725	-0.387179	-0.480858	-0.428088	2.52973	-0.012261	-0.409594	0.370304	AT1G12050.1	fumarylacetoacetase, putative	fumarylacetoacetase
Storvum011463t1	-0.215843	-0.255765	-0.164537	-1.65783	1.24527	1.63641	-0.683105	-0.406604	0.502002	AT3G19000.1	2-oxoglutarate (2OG) and Fe(II)-dependent oxygenase superfamily protein	protein DMR6-LIKE OXYGENASE 2-like
Storvum011473t1	-1.39155	-0.293936	-1.00885	-0.802498	1.01174	1.59843	0.778854	-0.195479	0.30329	AT1G02170.1	metacaspase 1	metacaspase-1-like isoform X1
Storvum011559t1	-0.780707	-1.00101	0.108587	-1.09189	0.648324	2.07103	-0.543942	0.24343	0.346176	AT4G16580.1	Protein phosphatase 2C family protein	probable protein phosphatase 2C 55
Storvum011574t1	-0.494674	-0.359197	-0.218635	-0.577021	-0.165342	2.60147	-0.455101	-0.472746	0.141251	AT5G25610.1	BURP domain-containing protein	BURP domain-containing protein 5-like
Storvum011598t1	-0.358742	-0.359582	-0.194138	-0.454672	-0.288984	2.65576	-0.385025	-0.416623	-0.197992	AT5G24530.1	2-oxoglutarate (2OG) and Fe(II)-dependent oxygenase superfamily protein	hyoscyamine 6-dioxygenase
Storvum011629t1	-0.715665	-0.813754	-0.859416	-0.692585	1.4192	1.74061	-0.347663	-0.316132	0.585405	AT3G45140.1	lipoxygenase 2	linoleate 13S-lipoxygenase 2-1, chloroplastic
Storvum011630t1	-0.407058	-0.0314764	0.61829	-0.444806	-0.369401	2.44243	-0.441019	-0.577509	-0.789452	AT4G10500.1	2-oxoglutarate (2OG) and Fe(II)-dependent oxygenase superfamily protein	hyoscyamine 6-dioxygenase-like
Storvum011632t1	-0.435221	-0.176467	-0.632731	-0.214156	1.44819	1.98206	-0.74469	-0.606279	-0.620708	AT1G15550.1	gibberellin 3-oxidase 1	gibberellin 3-beta-dioxygenase 1-like
Storvum011691t8	-0.385628	-0.402044	-0.390477	-0.426706	-0.111202	2.65329	-0.36013	-0.345908	-0.231194	AT1G23820.1	spermidine synthase 1	putrescine N-methyltransferase
Storvum011722t1	-0.607779	-0.0597895	-0.183699	-0.811623	0.692622	2.39087	-0.283129	-0.492901	-0.644567	AT1G80170.1	Pectin lyase-like superfamily protein	polygalacturonase QRT2-like
Storvum011724t1	-0.66982	-0.50296	-0.57129	-0.597705	0.0144168	2.2729	-0.596494	-0.338148	0.9891	AT4G37980.1	elicitor-activated gene 3-1	8-hydroxygeraniol dehydrogenase-like
Storvum011808t1	-0.591822	-0.303547	-0.313047	-0.518607	-0.233697	2.48257	-0.836772	-0.176531	0.491452	AT3G12750.1	zinc transporter 1 precursor	zinc transporter 8-like
Storvum011821t1	-0.222211	-0.751341	-0.39326	-1.0112	0.94123	2.21123	-0.650708	-0.0966617	-0.0270728	AT5G42750.1	BRI1 kinase inhibitor 1	BRI1 kinase inhibitor 1-like
Storvum011843t1	-1.17535	-0.587193	-0.603222	-0.615188	-0.0617627	2.31144	0.287321	0.265233	0.178718	AT5G16990.1	Zinc-binding dehydrogenase family protein	NADP-dependent alkenal double bond reductase P2-like
Storvum011986t1	-0.685426	-0.550217	0.0147845	-0.563114	0.189847	2.54567	-0.460431	-0.420319	-0.0707908	AT1G37140.1	MEI2 C-terminal RRM only like 1	protein terminal ear1 homolog
Storvum012007t1	-0.615938	1.08229	0.114462	-1.35218	-0.231616	1.7904	-1.00826	-0.281776	0.502628	AT5G14700.1	NAD(P)-binding Rossmann-fold superfamily protein	cinnamoyl-CoA reductase-like SNL6 isoform X1
Storvum012057t1	-0.879155	-0.605811	-0.493629	-0.705771	0.151828	2.16281	-0.437445	-0.267379	1.07456	AT5G16970.1	alkenal reductase	2-alkenal reductase (NADP(+)-dependent)-like
Storvum012143t1	-0.76905	-0.661003	0.48153	-1.078	0.650765	2.07094	0.00402195	-0.906801	0.207605	AT5G51780.1	basic helix-loop-helix (bHLH) DNA-binding superfamily protein	transcription factor bHLH118-like
Storvum012205t1	-0.328778	-0.2996	-0.114414	-1.04147	0.160976	2.48463	0.122691	-0.546334	-0.437696	AT1G12260.1	NAC 007	NAC domain-containing protein 7-like
Storvum012355t1	-0.749513	-0.515252	-0.254926	-0.735662	0.404983	2.40491	-0.653557	-0.256185	0.355197	AT5G24310.1	ABL interactor-like protein 3	protein ABIL2-like
Storvum012420t1	-0.84223	-0.575885	-0.554896	-0.965422	1.54064	1.74085	-0.508451	-0.0634718	0.228867	AT1G14720.1	xyloglucan endotransglucosylase/hydrolase 28	probable xyloglucan endotransglucosylase/hydrolase protein 28
Storvum012574t1	-1.02578	-0.801384	-0.0246736	-0.847838	1.31031	1.87509	0.187923	-0.550186	-0.123453	AT5G22410.1	root hair specific 18	peroxidase 60-like
Storvum012612t1	-0.357862	0.450766	0.560976	-0.73941	-0.00213369	2.04817	-1.52284	-0.533066	0.0954018	AT3G50210.3	2-oxoglutarate (2OG) and Fe(II)-dependent oxygenase superfamily protein	probable 2-oxoglutarate-dependent dioxygenase At3g49630
Storvum012622t1	-0.245722	-0.116189	-0.248333	-0.940318	-0.43946	2.32198	0.015634	-0.990764	0.64317	AT3G50820.1	photosystem II subunit O-2	oxygen-evolving enhancer protein 1, chloroplastic
Storvum012665t1	-0.158607	-0.711106	-1.32319	-0.549404	-0.263975	2.20822	-0.0879004	0.255374	0.630584	AT1G21510.1		TPRXL
Storvum012747t1	-0.899249	-0.0447595	-0.386377	-0.876296	0.0225526	2.20909	-0.733542	-0.194547	0.903126	AT3G01470.1	homeobox 1	homeobox-leucine zipper protein HAT5-like
Storvum012754t1	-0.377923	0.454592	0.204134	-0.595548	-0.534392	2.45996	-0.357106	-0.583364	-0.67035	AT5G06570.2	alpha/beta-Hydrolases superfamily protein	probable carboxylesterase 15
Storvum012755t1	-0.68841	-0.529521	-0.370546	-0.578453	-0.133261	2.34069	-0.582363	-0.358056	0.899925	AT1G05260.1	Peroxidase superfamily protein	peroxidase 5-like
Storvum012811t1	-0.361663	-0.986327	-0.440022	-0.594446	0.616176	2.07346	-0.624624	-0.625471	0.942917	AT4G01680.3	myb domain protein 55	myb-related protein 330-like isoform X2
Storvum012851t1	-0.697662	-0.268319	-0.667264	-1.61843	0.478014	1.94522	0.121764	0.129924	0.576753	AT4G11960.1	PGR5-like B	PGR5-like protein 1B, chloroplastic
Storvum012899t1	-0.396332	-0.68778	-0.610405	-1.3155	0.151743	2.18157	-0.070809	0.690028	0.0574858	AT5G67350.1		probable membrane-associated kinase regulator 1
Storvum012949t1	-0.834068	-0.910427	-0.515334	-0.739822	0.941576	1.91259	-0.555642	-0.180214	0.881339	AT2G22430.1	homeobox protein 6	homeobox-leucine zipper protein ATHB-6-like
Storvum012996t1	-0.293331	0.162099	0.782167	-0.672958	-0.677664	2.32568	-0.329984	-0.704212	-0.591795	AT1G52800.1	2-oxoglutarate (2OG) and Fe(II)-dependent oxygenase superfamily protein	probable 2-oxoglutarate-dependent dioxygenase AOP1
Storvum013079t1	-1.2037	-0.332172	0.408067	-1.2919	0.88966	1.68858	0.642751	-0.738501	-0.0627912	AT5G19260.1	Protein of unknown function (DUF3049)	protein FANTASTIC FOUR 3-like
Storvum013080t1	-0.351365	0.376039	0.400444	-0.613312	-0.374457	2.40847	-0.337254	-0.699264	-0.809301	AT1G52800.1	2-oxoglutarate (2OG) and Fe(II)-dependent oxygenase superfamily protein	probable 2-oxoglutarate-dependent dioxygenase AOP1
Storvum013097t11	-0.527818	-0.292591	-0.27478	-0.556702	-0.25302	2.56383	-0.385886	-0.598554	0.325522	AT1G52820.1	2-oxoglutarate (2OG) and Fe(II)-dependent oxygenase superfamily protein	probable 2-oxoglutarate-dependent dioxygenase AOP1
Storvum013107t1	-0.254857	0.206608	-0.0531956	-0.499488	-0.412829	2.1883	0.777747	-1.26798	-0.684308	AT1G63120.1	RHOMBOID-like 2	RHOMBOID-like protein 2
Storvum013130t1	-0.720811	-0.346069	0.103018	-0.940213	0.324455	2.43496	-0.200648	-0.624995	-0.029695	AT5G09430.1	alpha/beta-Hydrolases superfamily protein	uncharacterized hydrolase YugF-like
Storvum013159t1	-1.16249	-0.240593	-0.162596	-0.629435	0.296448	2.39923	-0.443688	-0.278853	0.221976	AT5G51890.1	Peroxidase superfamily protein	Peroxidase 66
Storvum013207t1	-1.07537	-0.287562	-0.692877	-0.77656	0.923553	2.05505	-0.591155	-0.0542726	0.499195	AT1G19400.2	Erythronate-4-phosphate dehydrogenase family protein	Erythronate-4-phosphate dehydrogenase family protein
Storvum013274t1	-0.346099	-0.32178	-0.553206	-0.611064	-0.268216	2.46171	0.00865131	-0.854605	0.484605	AT5G42180.1	Peroxidase superfamily protein	peroxidase 64-like
Storvum013277t1	-1.32469	-0.867424	-0.318666	-0.881476	0.934986	1.79277	0.396414	-0.273961	0.542039	AT2G28200.1	C2H2-type zinc finger family protein	zinc finger protein ZAT5-like
Storvum013294t1	-0.52384	-0.618967	-1.2391	-0.294867	0.495415	2.02642	1.00375	-0.406851	-0.441955	NA	NA	extensin-2-like
Storvum013315t1	-0.446325	-0.17207	-0.336475	-0.387598	0.774714	2.38103	-0.375558	-0.89731	-0.540407	AT4G30170.1	Peroxidase family protein	peroxidase 16-like
Storvum013345t1	-0.401643	0.125765	0.136553	-0.466264	-0.397547	2.55315	-0.346291	-0.783221	-0.420505	AT1G52820.1	2-oxoglutarate (2OG) and Fe(II)-dependent oxygenase superfamily protein	probable 2-oxoglutarate-dependent dioxygenase AOP1
Storvum013455t1	0.02248	-0.0697975	-0.0869298	-0.426829	0.451539	2.23295	0.131495	-1.2938	-0.961107	AT1G45688.1		NDR1/HIN1-Like protein
Storvum013623t1	-0.568804	0.403732	0.688005	-1.03963	0.372083	2.11238	-0.843206	-0.474637	-0.649923	AT3G53420.2	plasma membrane intrinsic protein 2A	aquaporin PIP2-1-like
Storvum013639t1	-0.441322	-0.285906	-1.25857	-0.491451	0.822841	2.12289	-0.578672	-0.376922	0.487112	AT1G14500.1	Ankyrin repeat family protein	chitinase 2-like
Storvum013688t1	-1.11008	-0.325939	-0.0818782	-1.0153	1.47565	1.77142	-0.359559	-0.418431	0.0641259	AT2G44210.1	Protein of Unknown Function (DUF239)	carboxyl-terminal peptidase
Storvum013812t1	-0.781489	-0.257394	-0.242032	-0.886589	-0.489696	2.4335	0.154097	-0.346331	0.415939	AT5G64260.1	EXORDIUM like 2	protein EXORDIUM-like 2
Storvum013895t1	-0.723011	0.46712	-0.441414	-0.750304	0.738458	1.89093	0.683574	-0.638314	-1.22703	AT5G14090.1		protein LAZY 1-like isoform X1
Storvum013951t1	-0.152147	0.187768	0.0685351	-0.341221	-0.048794	2.27909	0.251271	-0.977699	-1.2668	AT2G36870.1	xyloglucan endotransglucosylase/hydrolase 32	probable xyloglucan endotransglucosylase/hydrolase protein 32
Storvum014016t1	-0.812971	-0.67595	-0.37386	-0.69208	0.8649	2.23596	0.036268	-0.706488	0.124225	AT1G53580.1	glyoxalase II 3	persulfide dioxygenase ETHE1 homolog, mitochondrial-like
Storvum014028t1	-0.429738	-0.425267	-0.322806	-0.656291	0.42451	2.52341	-0.39185	-0.623244	-0.0987275	AT3G44990.1	xyloglucan endo-transglycosylase-related 8	xyloglucan endotransglucosylase/hydrolase protein 31-like
Storvum014038t1	-0.864444	-0.399489	0.0428453	-0.853339	1.53864	1.5983	0.465594	-0.932575	-0.595535	AT4G28850.1	xyloglucan endotransglucosylase/hydrolase 26	probable xyloglucan endotransglucosylase/hydrolase protein 26
Storvum014042t1	-0.678343	-0.322051	0.0754143	-0.864904	-0.201411	2.19263	-0.189229	-0.954291	0.942179	AT1G70830.1	MLP-like protein 28	kirola-like
Storvum014053t1	-0.21212	0.260371	-0.0172129	-0.527416	0.938708	2.02606	-0.299128	-1.38491	-0.784348	AT1G73760.1	RING/U-box superfamily protein	E3 ubiquitin-protein ligase MBR2-like
Storvum014074t1	-0.356665	-0.702869	-0.333665	-0.766992	0.904922	2.16555	-0.051834	-1.06149	0.20305	AT1G72210.1	basic helix-loop-helix (bHLH) DNA-binding superfamily protein	transcription factor bHLH96-like
Storvum014216t1	-1.11566	-0.682077	0.0152121	-1.02094	0.182248	1.3492	1.77972	-0.0328338	-0.474864	AT5G62180.1	carboxyesterase 20	probable carboxylesterase 120
Storvum014255t1	-0.868551	-0.562969	-0.166617	-0.852203	1.44309	1.91429	-0.00471385	-0.552456	-0.349876	AT4G28850.1	xyloglucan endotransglucosylase/hydrolase 26	probable xyloglucan endotransglucosylase/hydrolase protein 26
Storvum014297t1	-1.1045	-0.373581	-0.658149	-0.802708	0.299526	2.09663	0.392201	-0.600085	0.750664	AT2G17070.1	Arabidopsis protein of unknown function (DUF241)	hypothetical protein BC332_12214
Storvum014347t1	-0.986313	-0.352278	-0.0944547	-0.490198	1.1209	2.18097	-0.512358	-0.393598	-0.472664	AT4G33950.1	Protein kinase superfamily protein	serine/threonine-protein kinase SAPK2
Storvum014393t1	-0.616135	-0.282429	-0.298276	-0.806542	-0.0539568	2.31256	-0.511156	-0.63238	0.888316	AT3G55250.1		photosystem I assembly factor PSA3, chloroplastic
Storvum014525t1	-0.213553	0.207159	0.0662141	-0.265723	-0.10847	2.33981	0.129005	-1.15647	-0.997969	AT1G52340.1	NAD(P)-binding Rossmann-fold superfamily protein	secoisolariciresinol dehydrogenase-like
Storvum014562t1	-1.12027	-0.205424	-0.520117	-1.0258	0.199849	2.21425	0.0980816	-0.246274	0.605707	AT5G52260.1	myb domain protein 19	transcription factor LAF1-like
Storvum014602t1	-0.483399	-0.898726	-0.455429	-1.08082	1.03009	1.87561	-0.62371	-0.135968	0.772361	AT5G12250.1	beta-6 tubulin	tubulin beta chain-like
Storvum014667t1	-0.73677	-0.0420309	-0.0132574	-0.782677	0.180632	2.52121	-0.272153	-0.343825	-0.511126	AT5G47650.1	nudix hydrolase homolog 2	nudix hydrolase 2-like isoform X1
Storvum014744t1	-0.476188	-0.412348	-0.950605	-0.35839	1.99983	1.4092	-0.612103	-0.425454	-0.173948	AT5G19650.1	ovate family protein 8	transcription repressor OFP8
Storvum014791t1	-0.742321	-0.561585	0.238495	-0.401501	1.47549	1.7048	0.124382	-0.66599	-1.17177	AT1G73830.1	BR enhanced expression 3	transcription factor BEE 3-like
Storvum014801t1	-0.468353	-0.248802	-0.354761	-0.332715	1.98719	1.46159	-0.707246	-0.708385	-0.628514	AT5G50740.1	Heavy metal transport/detoxification superfamily protein	heavy metal-associated isoprenylated plant protein 7-like isoform X2
Storvum014836t1	-0.292832	0.746878	0.845071	-1.43349	-0.217855	1.86295	-0.683139	-0.774501	-0.0530778	AT1G44575.1	Chlorophyll A-B binding family protein	photosystem II 22 kDa protein, chloroplastic
Storvum014863t1	-1.67881	1.12299	0.214099	-0.659836	0.336544	1.57114	-0.913598	-0.103115	0.110574	AT5G08305.1	Pentatricopeptide repeat (PPR) superfamily protein	Ulp1 protease family, C-terminal catalytic domain containing protein
Storvum014887t1	-0.297905	0.03168	-0.391032	-0.408969	0.171812	2.54383	-0.65565	-0.784854	-0.208909	AT2G10940.2	Bifunctional inhibitor/lipid-transfer protein/seed storage 2S albumin superfamily protein	36.4 kDa proline-rich protein-like
Storvum014944t1	-0.723692	-0.324655	-0.0966418	-0.298812	0.31145	2.09097	0.590672	-1.56649	0.0171977	AT4G28500.1	NAC domain containing protein 73	NAC domain-containing protein 73
Storvum015001t1	0.716647	-0.768444	-0.377733	-0.608199	-1.36135	1.68507	1.09896	-0.64457	0.259628	AT3G54890.1	photosystem I light harvesting complex gene 1	Chlorophyll a-b binding protein 6A, chloroplastic
Storvum015041t1	0.634606	0.103341	0.547488	-0.651921	-0.536756	2.10808	-0.805608	-1.20052	-0.198713	AT5G54270.1	light-harvesting chlorophyll B-binding protein 3	chlorophyll a-b binding protein 13, chloroplastic
Storvum015065t1	0.144836	0.31136	-0.537777	-1.02062	-0.375089	2.39721	-0.620769	0.192316	-0.491468	NA	NA	chitinase 2-like
Storvum015075t1	-0.711798	-0.614691	0.397254	-0.559413	1.36817	1.67843	0.315129	-0.71052	-1.16257	AT5G11890.1		NDR1/HIN1-like protein 6
Storvum015130t1	-0.954449	-0.0189062	0.579936	-0.765434	0.138796	1.72093	1.13432	-1.24541	-0.589793	AT5G51790.1	basic helix-loop-helix (bHLH) DNA-binding superfamily protein	transcription factor bHLH118-like
Storvum015182t1	-0.711634	-0.426455	-0.488495	-0.559304	0.307304	2.52115	-0.401531	0.123765	-0.3648	AT1G08465.1	Plant-specific transcription factor YABBY family protein	keratin, type I cytoskeletal 9-like
Storvum015184t1	-0.730641	-0.864208	-0.0119064	-0.129773	-0.269776	2.42514	-0.0556169	-0.764356	0.401138	AT4G37470.1	alpha/beta-Hydrolases superfamily protein	probable esterase KAI2
Storvum015225t1	-0.601141	-0.238258	-0.558512	-0.415911	0.353031	2.54724	-0.603245	-0.281986	-0.201214	AT2G44940.1	Integrase-type DNA-binding superfamily protein	ethylene-responsive transcription factor ERF039-like
Storvum015231t1	-0.722727	-0.20015	0.0377787	-1.16188	0.167372	2.35181	-0.643816	-0.135524	0.307144	AT5G43180.1	Protein of unknown function, DUF599	DUF599 domain-containing protein
Storvum015262t1	-0.0316618	-0.25655	-0.355404	-0.570478	-0.32516	2.63121	-0.459184	-0.172534	-0.460236	AT5G40020.1	Pathogenesis-related thaumatin superfamily protein	thaumatin-like protein
Storvum015266t1	-0.687877	-0.342757	-1.0501	-0.556138	0.231163	2.26966	-0.521434	-0.0614776	0.718961	AT2G18670.1	RING/U-box superfamily protein	RING-H2 finger protein ATL56-like
Storvum015296t1	-0.954898	-0.249349	0.164268	-0.95047	0.70837	2.077	0.535027	-0.431216	-0.898728	AT5G06990.1	Protein of unknown function, DUF617	protein MIZU-KUSSEI 1
Storvum015317t1	-0.389991	-0.0339415	-0.652834	-0.181369	-0.537214	2.50462	0.039601	-0.895952	0.147077	AT4G25150.1	HAD superfamily, subfamily IIIB acid phosphatase	acid phosphatase 1-like
Storvum015386t1	0.536098	0.806488	0.242401	-1.73367	-0.398499	1.42305	-0.667158	-0.925046	0.716335	AT1G15820.1	light harvesting complex photosystem II subunit 6	chlorophyll a-b binding protein CP24 10A, chloroplastic
Storvum015405t1	-1.09874	-0.0060058	0.998056	-1.4016	0.572775	1.46295	0.0407461	-1.05893	0.490757	AT3G59400.1	enzyme binding;tetrapyrrole binding	tetrapyrrole-binding protein, chloroplastic
Storvum015436t1	-0.604339	-0.522569	-0.773939	0.0709174	-0.349224	2.2265	-0.752997	-0.303856	1.00951	AT4G35000.1	ascorbate peroxidase 3	L-ascorbate peroxidase 3, peroxisomal-like
Storvum015443t1	-0.811201	-0.381962	-0.112115	-0.582459	0.971795	2.03264	0.560296	-0.993647	-0.683344	AT1G12560.1	expansin A7	expansin-A7-like
Storvum015476t1	-1.34539	-0.223259	-0.0317187	-0.857599	1.50895	1.50817	0.257269	0.0675209	-0.883942	AT3G10870.1	methyl esterase 17	methylesterase 17-like
Storvum015537t1	-0.902365	-0.864941	0.251849	-1.17165	1.69118	1.40518	-0.18501	0.119626	-0.343872	AT4G34135.1	UDP-glucosyltransferase 73B2	scopoletin glucosyltransferase-like
Storvum015570t1	-0.725578	0.0343745	0.031677	-0.129955	-0.589151	2.52146	-0.360407	0.00477798	-0.787199	AT4G19840.1	phloem protein 2-A1	protein PHLOEM PROTEIN 2-LIKE A1-like
Storvum015595t1	0.369391	0.7412	-0.335318	-1.08553	-0.487596	1.9463	-0.312847	-1.2983	0.462703	AT1G06680.1	photosystem II subunit P-1	Oxygen-evolving enhancer protein 2, chloroplastic
Storvum015676t1	-0.637133	-0.537873	-0.759016	-0.629042	0.122637	2.29143	-0.657836	0.0103342	0.7965	AT2G01990.1		protein XRI1-like
Storvum015762t1	-0.796692	0.491659	-0.966573	-0.111369	0.922531	2.09889	-0.648461	-0.565438	-0.424551	AT4G15630.1	Uncharacterised protein family (UPF0497)	CASP-like protein 1E2
Storvum015763t1	-0.958537	-0.753885	-0.379618	-0.83612	1.31186	1.80662	-0.584647	-0.167002	0.561324	AT2G40610.1	expansin A8	expansin A10
Storvum015784t1	0.0389003	-0.440368	0.65483	-0.416021	0.853541	1.97151	-0.597031	-1.25406	-0.811295	AT2G36885.1		Di-heme cytochrome, transmembrane
Storvum015851t1	-1.28121	0.055677	-0.605465	-0.925157	0.972529	1.81662	-0.629434	-0.0973294	0.693764	AT1G06460.1	alpha-crystallin domain 32.1	putative small heat shock protein
Storvum015943t1	-0.567464	0.434574	-0.305256	-1.26961	0.606811	1.86066	-0.851379	-0.736704	0.828359	AT3G52740.1		protein BIC1-like
Storvum016017t1	-1.20479	-0.0851346	-0.406075	-0.412489	0.170203	2.2661	-0.825062	-0.0960715	0.593317	AT1G72830.1	nuclear factor Y, subunit A3	nuclear transcription factor Y subunit A-7-like
Storvum016027t1	-0.389491	0.272405	-0.463848	-0.0544873	-0.588333	2.27183	0.560044	-1.27413	-0.33399	AT4G13580.1	Disease resistance-responsive (dirigent-like protein) family protein	dirigent protein 25-like
Storvum016099t2	-0.878772	-1.31759	-0.30956	-0.88444	0.694822	1.17885	1.57915	0.319143	-0.381604	AT5G16030.2		PREDICTED: uncharacterized protein LOC107799285
Storvum016211t1	-0.655916	0.0218957	-0.314013	-0.806362	1.71171	1.51416	-0.787743	-0.951596	0.267859	AT3G17730.1	NAC domain containing protein 57	NAC domain-containing protein 86 isoform X1
Storvum016245t1	-0.642311	-0.58225	-0.329353	-0.83443	0.533622	2.384	-0.133382	-0.633444	0.237549	AT1G01200.1	RAB GTPase homolog A3	ras-related protein RABA3
Storvum016276t1	-1.0893	0.638219	-0.612385	-0.245396	-0.873412	1.97636	0.583766	-0.855949	0.4781	NA	NA	glycine-rich cell wall structural protein 1.8-like
Storvum016305t1	-0.575658	-0.185586	-0.893534	-0.919045	-0.170225	2.21584	-0.184989	-0.261326	0.974524	AT5G66440.1		PREDICTED: uncharacterized protein LOC107059094
Storvum016686t1	-0.858932	-0.744004	-0.834915	-0.567594	1.3177	1.62205	-0.719623	-0.105267	0.890594	AT4G20970.1	basic helix-loop-helix (bHLH) DNA-binding superfamily protein	transcription factor bHLH162-like
Storvum016853t1	-0.216935	0.154854	-0.72406	-0.760134	-0.542646	2.29466	-0.212728	-0.778068	0.785054	AT5G23230.1	nicotinamidase 2	nicotinamidase 2-like
Storvum016859t1	-0.804968	-0.179231	-0.0495955	-0.586428	0.55311	1.96429	1.00224	-0.929446	-0.969967	AT5G17390.1	Adenine nucleotide alpha hydrolases-like superfamily protein	PREDICTED: uncharacterized protein LOC102582716
Storvum016916t1	-1.29909	-0.616405	-0.0945088	-1.10674	0.842811	1.72025	-0.342063	-0.0575088	0.953253	AT2G42760.1		PREDICTED: uncharacterized protein LOC107061093
Storvum017135t1	-1.15808	-0.068628	-0.573372	-0.852845	0.506753	2.10911	-0.649566	0.000359241	0.686265	AT2G44840.1	ethylene-responsive element binding factor 13	Ethylene-responsive transcription factor 2
Storvum017151t2	-0.249004	0.250138	-0.579784	-0.350686	-0.477118	2.52679	-0.834046	0.0403701	-0.326663	AT1G10460.1	germin-like protein 7	germin-like protein subfamily 1 member 1
Storvum017167t11	0.789797	-0.422365	-0.147319	-1.2279	0.0568132	2.22773	-0.505718	-0.658832	-0.112204	AT1G31330.1	photosystem I subunit F	photosystem I reaction center subunit III, chloroplastic-like
Storvum017252t1	-0.688205	0.0492391	-0.904251	-0.630062	0.840522	2.20634	-0.769791	-0.31356	0.209771	AT3G05327.1	Cyclin family protein	cyclin-P3-1-like isoform X2
Storvum017270t1	-1.05907	-0.540675	-0.148851	-0.369806	1.49131	1.7258	0.358443	-0.860107	-0.597048	AT2G30395.1	ovate family protein 17	transcription repressor OFP17-like
Storvum017288t2	-0.0733495	-0.0477465	-0.444512	-0.257592	1.86364	1.44654	-0.586842	-0.869111	-1.03103	AT1G72610.1	germin-like protein 1	auxin-binding protein ABP19a-like
Storvum017353t1	-0.814523	-0.374337	0.0416028	-0.803426	0.171044	2.24387	-0.841698	-0.405104	0.782567	AT1G17100.1	SOUL heme-binding family protein	heme-binding protein 2-like
Storvum017358t1	-0.928558	-0.381779	-0.691433	-0.771663	0.394377	2.21068	-0.441823	-0.192127	0.802327	AT2G01818.1	PLATZ transcription factor family protein	PREDICTED: uncharacterized protein LOC107017234
Storvum017380t1	-0.840671	-0.155181	-0.284946	-0.992267	0.0942766	2.2111	-0.675979	-0.244491	0.888158	AT5G20700.1	Protein of unknown function (DUF581)	protein MARD1
Storvum017431t1	-0.794505	-0.586644	-0.68784	-0.818414	0.800916	1.99868	-0.777117	0.0667196	0.798203	AT5G64620.1	cell wall / vacuolar inhibitor of fructosidase 2	cell wall / vacuolar inhibitor of fructosidase 2
Storvum017453t1	-0.411002	0.568915	-0.246747	-0.457361	-0.24387	2.42215	-0.504618	-1.02245	-0.105012	AT4G24015.1	RING/U-box superfamily protein	probable E3 ubiquitin-protein ligase RHA4A
Storvum017454t1	-0.34459	0.321399	-0.192811	-0.179048	-0.361053	2.11423	-0.660717	-1.45067	0.753264	AT5G59350.1		Serine/threonine-protein kinase roco5
Storvum017481t1	-0.728827	-0.451082	-0.7764	-0.310853	0.287763	2.20085	0.918498	-0.840159	-0.299787	AT5G54750.2	Transport protein particle (TRAPP) component	extensin-2-like
Storvum017617t1	-0.728606	-0.692648	-0.498078	-0.648079	-0.191875	2.38409	-0.296787	-0.0426447	0.71463	AT1G17180.1	glutathione S-transferase TAU 25	probable glutathione S-transferase
Storvum017649t1	-0.350403	-0.360638	-0.0850141	-0.492756	-0.176498	2.64316	-0.482832	-0.397729	-0.297287	AT1G78380.1	glutathione S-transferase TAU 19	probable glutathione S-transferase
Storvum017714t2	-0.490474	-0.0937877	-0.284238	-0.932125	0.318952	2.48873	-0.630438	-0.324567	-0.0520486	AT5G43270.1	squamosa promoter binding protein-like 2	citrate-binding protein-like
Storvum017733t1	-0.684393	-0.323952	0.0991453	-0.702199	1.34845	1.69876	0.528781	-0.910637	-1.05395	AT4G09720.1	RAB GTPase homolog G3A	ras-related protein Rab7-like
Storvum018035t1	-0.786429	-0.61919	0.0769511	-0.942005	1.30507	1.90843	0.23649	-0.525657	-0.653662	AT5G09530.1	hydroxyproline-rich glycoprotein family protein	extensin-2-like
Storvum018057t1	-0.819189	-0.508686	-0.415428	-0.746869	1.07236	2.1647	-0.699504	-0.105723	0.0583389	AT5G53730.1	Late embryogenesis abundant (LEA) hydroxyproline-rich glycoprotein family	protein YLS9
Storvum018074t1	-0.695367	0.346392	0.187566	-1.66254	0.736295	1.50844	-0.995242	-0.271444	0.845901	NA	NA	---NA---
Storvum018088t1	-0.55373	-0.40268	-0.0937011	-0.604062	0.839599	2.31408	-0.649846	-0.821313	-0.0283486	AT5G54530.1	Protein of unknown function, DUF538	PREDICTED: uncharacterized protein LOC102580459
Storvum018117t2	-0.143092	-0.542076	0.0912473	-0.618561	0.99747	2.06959	-0.0414918	-1.33737	-0.475719	AT2G20430.1	ROP-interactive CRIB motif-containing protein 6	CRIB domain-containing protein RIC6-like
Storvum018170t3	0.00836262	-1.33591	-1.25194	0.00794972	0.724908	1.76767	-0.292461	-0.463602	0.835022	AT2G14095.1		PREDICTED: uncharacterized protein LOC107019868
Storvum018216t1	-0.452517	-0.463206	-0.188593	-0.922614	-0.0594426	2.38077	-0.565785	-0.441078	0.712461	AT1G71750.1	Hypoxanthine-guanine phosphoribosyltransferase	hypoxanthine-guanine phosphoribosyltransferase
Storvum018247t1	-1.01168	-0.622288	-0.509232	-0.845625	1.20551	2.01709	0.0490092	-0.300383	0.01759	AT1G21550.1	Calcium-binding EF-hand family protein	probable calcium-binding protein CML44
Storvum018281t1	-0.72699	-0.69556	-0.547467	-0.507834	-0.0580511	2.52175	-0.130471	-0.0691232	0.21375	AT1G12060.1	BCL-2-associated athanogene 5	BAG family molecular chaperone regulator 5, mitochondrial
Storvum018411t1	-1.21868	0.0283684	-0.646912	-0.451611	0.452143	2.12294	-0.921302	0.0627736	0.572278	AT1G65870.1	Disease resistance-responsive (dirigent-like protein) family protein	dirigent protein 22-like
Storvum018447t1	-0.819551	0.0899149	-0.183301	-0.456703	0.395818	2.45473	-0.679202	-0.638591	-0.163112	AT3G16300.1	Uncharacterised protein family (UPF0497)	CASP-like protein 3A1
Storvum018471t3	-1.31358	-0.621739	0.569834	-0.102108	0.249436	2.24948	-0.274904	-0.192752	-0.563665	AT2G32280.1	Protein of unknown function (DUF1218)	hypothetical protein BC332_18933
Storvum018527t1	0.0539488	0.142859	0.443133	-0.440053	-0.382205	2.34706	-0.24803	-1.0878	-0.828905	AT4G05200.1	cysteine-rich RLK (RECEPTOR-like protein kinase) 25	antifungal protein ginkbilobin-2-like
Storvum018588t1	-1.00759	-0.492812	-0.165836	-0.67597	0.771023	1.96717	-0.908237	-0.390841	0.903097	AT4G25780.1	CAP (Cysteine-rich secretory proteins, Antigen 5, and Pathogenesis-related 1 protein) superfamily protein	pathogenesis-related protein PR-1
Storvum018589t1	-0.786549	-0.65281	-0.515436	-0.594552	0.5493	2.29823	-0.793532	0.251489	0.243857	AT4G00300.1	fringe-related protein	hypothetical protein A4A49_06396
Storvum018590t1	-1.16641	0.235827	0.353449	-0.470511	0.489491	2.23502	-0.377958	-0.559339	-0.73957	AT1G11700.1	Protein of unknown function, DUF584	Immunoglobulin-like and fibronectin type III domain-containing protein
Storvum018704t1	-0.381973	-0.563658	-1.05302	-1.04634	0.805966	1.11236	1.63009	-0.826987	0.323564	AT2G33470.2	glycolipid transfer protein 1	glycolipid transfer protein 1-like
Storvum018823t1	-0.769346	-0.210275	-0.50141	-0.605168	0.968875	1.70595	-1.20987	-0.476945	1.09818	AT3G61920.1		UvrABC system protein C
Storvum018921t1	-0.917286	-0.722784	-1.08804	0.691152	-0.669429	2.09824	0.192492	0.223101	0.192564	AT1G54400.1	HSP20-like chaperones superfamily protein	17.5 kDa class I heat shock protein-like
Storvum018962t1	-1.06004	-0.804452	1.36438	-1.3745	0.65998	1.14447	-0.657999	0.231919	0.496238	NA	NA	craniofacial development protein 2-like
Storvum019036t1	-0.981887	-0.290599	-0.146361	-0.769114	1.66781	1.70419	-0.0563009	-0.646305	-0.481428	AT2G47540.1	Pollen Ole e 1 allergen and extensin family protein	pistil-specific extensin-like protein
Storvum019123t2	-0.679189	-0.33041	-0.555174	-0.814474	0.0247148	2.42153	-0.627502	0.13414	0.426367	AT1G43790.1	tracheary element differentiation-related 6	glyceraldehyde-3-phosphate dehydrogenase, testis-specific-like
Storvum019188t1	-0.186824	0.551739	-0.321012	-0.598155	-1.36422	2.20667	-0.0186322	-0.599908	0.330349	AT1G67740.1	photosystem II BY	photosystem II core complex proteins psbY, chloroplastic
Storvum019244t1	-1.1557	-0.588667	-0.958624	0.0266647	1.41287	1.40083	0.907156	-0.333617	-0.710908	AT1G24620.1	EF hand calcium-binding protein family	probable calcium-binding protein CML25
Storvum019247t2	-0.464436	-0.306599	-0.329292	-1.12436	1.31356	1.9772	-0.788357	-0.245777	-0.0319424	AT5G49230.1	Drought-responsive family protein	protein DEHYDRATION-INDUCED 19 homolog 5-like isoform X2
Storvum019250t1	-0.911733	-0.967326	-0.0930054	-0.691685	0.961342	2.1734	-0.112579	-0.282117	-0.0763001	AT1G05990.1	EF hand calcium-binding protein family	calmodulin-like protein 3
Storvum019484t1	-0.611715	-0.379372	0.144591	-0.704964	-0.0233112	2.56358	-0.521678	-0.162023	-0.305112	AT3G01570.1	Oleosin family protein	oleosin 5-like
Storvum019683t1	-0.910804	0.70483	-0.0265682	-0.431922	0.736466	2.05083	-0.35466	-1.04076	-0.727412	AT3G48020.1		IS10 transposase, putative
Storvum019755t1	-0.93617	-0.26986	-0.519997	-0.906597	1.79337	1.47741	0.286393	-0.304025	-0.62053	AT2G30395.1	ovate family protein 17	transcription repressor OFP17-like
Storvum019802t2	0.40823	0.806266	-0.557078	-1.2911	0.677697	1.66533	0.200431	-1.18901	-0.720761	AT5G42655.1	Disease resistance-responsive (dirigent-like protein) family protein	dirigent protein 11
Storvum019943t2	-0.868762	-0.739646	-0.620925	-0.581363	0.287357	2.28344	0.711517	-0.409757	-0.0618595	AT5G39510.1	Vesicle transport v-SNARE family protein	predicted protein
Storvum020097t1	-0.778742	0.333611	-0.190061	-0.772833	-0.353142	2.50072	-0.318881	-0.410841	-0.00982925	AT1G63310.1		hypothetical protein CQW23_02396
Storvum020195t1	-0.614732	0.327627	-0.200955	-0.498148	1.41948	1.80637	-0.815406	-0.345205	-1.07903	AT3G25400.1		dCTP pyrophosphatase 1-like
Storvum020267t1	-0.599916	0.373741	-0.168835	-0.902835	-0.0940922	2.49574	-0.378466	-0.443174	-0.282159	AT5G38410.1	Ribulose bisphosphate carboxylase (small chain) family protein	ribulose bisphosphate carboxylase
Storvum020462t2	-0.926334	-0.609709	-0.745397	-0.547508	0.605489	2.12423	-0.776821	0.282096	0.593952	AT4G33040.1	Thioredoxin superfamily protein	glutaredoxin-C6
Storvum020484t1	-0.0366452	0.355905	0.103479	-0.0347298	-0.903772	2.35733	-0.219354	-1.05848	-0.563731	AT2G26900.1	Sodium Bile acid symporter family	Succinate dehydrogenase [ubiquinone] iron-sulfur subunit 2, mitochondrial
Storvum020553t1	-0.192695	0.391261	-0.445346	-0.373143	-0.783161	2.12683	0.548091	-1.41895	0.147109	AT1G47960.1	cell wall / vacuolar inhibitor of fructosidase 1	invertase inhibitor
Storvum020603t1	-0.986374	-0.482699	-0.430505	-0.952629	0.628953	2.26988	-0.00503184	-0.296832	0.255235	AT3G54040.1	PAR1 protein	Zinc finger protein
Storvum020649t1	-1.41926	0.152282	0.721048	-0.461833	0.385805	1.55369	-0.714421	-1.14125	0.92394	AT5G50720.1	HVA22 homologue E	HVA22-like protein e
Storvum020727t1	-0.722776	0.411282	-0.0810365	-0.906034	-0.0873213	1.78568	-0.570518	-1.12803	1.29875	AT2G26500.1	cytochrome b6f complex subunit (petM), putative	Cytochrome b6-f complex subunit 7
Storvum020879t1	-0.312889	0.789615	-0.662677	-0.788623	0.495898	2.20949	-0.40526	-0.816044	-0.509514	AT1G10155.1	phloem protein 2-A10	protein PHLOEM PROTEIN 2-LIKE A9-like
Storvum021025t1	-0.799306	-0.520036	-0.670389	-0.596536	0.405095	2.4481	0.00705976	-0.349725	0.0757348	AT3G13550.1	Ubiquitin-conjugating enzyme family protein	constitutive photomorphogenesis protein 10
Storvum021064t1	-1.65365	-0.69851	0.175104	-1.1223	0.799982	1.3685	0.40281	-0.159059	0.887127	AT1G18530.1	EF hand calcium-binding protein family	probable calcium-binding protein CML15
Storvum021354t1	-0.648854	-0.378004	-0.622179	-0.589938	0.177994	2.4202	-0.699269	-0.19406	0.534106	AT5G41050.1	Pollen Ole e 1 allergen and extensin family protein	pollen allergen Che a 1
Storvum021476t1	-1.09811	-0.693061	-0.367683	-0.909823	1.25684	1.71209	-0.708922	0.332168	0.476499	AT4G34590.1	G-box binding factor 6	bZIP transcription factor 53-like
Storvum021535t1	-1.0989	-0.940244	0.850892	0.0881883	-0.17645	1.80474	0.00141736	-1.19972	0.670074	AT5G38420.1	Ribulose bisphosphate carboxylase (small chain) family protein	ribulose bisphosphate carboxylase small chain clone 512-like
Storvum021675t1	-1.00126	-0.609716	-0.338794	-1.02612	1.11347	1.76862	-0.628893	-0.10424	0.826932	AT2G06925.1	Phospholipase A2 family protein	phospholipase A2-alpha
Storvum021696t1	-0.594017	-0.572392	-0.61344	-0.50946	0.211681	2.5036	-0.594051	0.127741	0.0403419	NA	NA	glycine-rich cell wall structural protein-like
Storvum021698t1	-0.845467	-0.236943	-0.499751	-1.09201	0.0594088	2.38918	0.18452	-0.121205	0.162269	AT1G12663.1		thionin-like protein 2
Storvum021802t1	-0.639135	-0.568741	-0.449817	-0.426272	0.0759349	2.59259	-0.0291789	-0.306456	-0.248922	AT2G27740.1	Family of unknown function (DUF662)	calponin homology domain-containing protein DDB_G0272472-like
Storvum021894t1	-0.535337	-0.611008	-0.123624	-0.665593	-0.13158	2.38618	-0.591173	-0.490068	0.762198	AT1G72060.1	serine-type endopeptidase inhibitors	trypsin proteinase inhibitor precursor
Storvum022005t1	-0.947472	-0.0255289	0.116284	-0.678655	0.431043	2.37993	-0.705676	-0.527137	-0.0427878	AT5G53300.3	ubiquitin-conjugating enzyme 10	ubiquitin-conjugating enzyme E2 10-like
Storvum022110t2	-1.04977	0.0894801	-0.933275	0.156847	0.818849	2.04823	-0.744042	-0.693357	0.307035	AT5G13910.1	Integrase-type DNA-binding superfamily protein	ethylene-responsive transcription factor LEP-like
Storvum022226t2	-0.813	0.585692	-0.235463	-0.599273	-0.641808	2.13269	-1.07675	-0.0308932	0.678802	AT5G59320.1	lipid transfer protein 3	non-specific lipid-transfer protein 1-like
Storvum022378t1	-0.577167	-0.493657	-0.474363	-0.424703	-0.462922	2.25414	-0.574221	-0.368264	1.12116	AT2G45180.1	Bifunctional inhibitor/lipid-transfer protein/seed storage 2S albumin superfamily protein	14 kDa proline-rich protein DC2.15-like
Storvum022625t1	-0.486508	0.727663	-0.130809	0.228523	-0.927392	2.24553	-1.02678	-0.382717	-0.247514	AT4G16447.1		hypothetical protein T459_19802
Storvum022654t1	-0.327242	0.894067	0.274478	-1.94116	-0.157644	1.54647	-0.371502	0.629612	-0.547076	AT4G21880.1	Pentatricopeptide repeat (PPR) superfamily protein	---NA---
Storvum022721t1	-0.526403	-0.417026	-0.455865	-0.572002	-0.13593	2.44463	-0.566807	-0.464826	0.694227	AT5G28010.1	Polyketide cyclase/dehydrase and lipid transport superfamily protein	kirola-like
Storvum022864t1	-0.329056	-0.304322	-1.06355	-0.273431	1.16455	1.71609	-0.806584	-0.956318	0.852616	AT1G58007.2		multidrug resistance protein
Storvum022997t1	-0.959624	-0.365162	-0.517206	-0.84129	0.335155	2.20038	-0.434766	-0.282247	0.864756	AT4G39700.1	Heavy metal transport/detoxification superfamily protein	heavy metal-associated isoprenylated plant protein 23
Storvum023003t1	-0.746558	0.373183	0.927965	-0.872174	1.49742	1.16167	-0.611501	-1.19624	-0.53377	AT3G12480.1	nuclear factor Y, subunit C11	putative disease resistance RPP13-like protein 1
Storvum023009t1	0.353334	-1.04485	0.31904	0.687822	-0.7703	2.03573	0.0923354	-0.659318	-1.01379	AT1G05460.1	P-loop containing nucleoside triphosphate hydrolases superfamily protein	---NA---
Storvum023087t1	-0.754852	-0.526995	-0.178701	-0.96013	0.168022	2.29309	0.76233	-0.334971	-0.467796	AT3G07600.1	Heavy metal transport/detoxification superfamily protein	heavy metal-associated isoprenylated plant protein 16-like
Storvum023114t1	-0.397645	0.0844719	0.0323631	-0.625779	1.92005	1.35965	-0.809717	-0.661026	-0.902367	AT3G24450.1	Heavy metal transport/detoxification superfamily protein	heavy metal-associated isoprenylated plant protein 45 isoform X1
Storvum023371t1	-0.482123	0.115089	-0.487147	-0.830864	1.3559	1.95145	-0.759728	-0.0915591	-0.77102	AT4G27960.1	ubiquitin conjugating enzyme 9	ubiquitin-conjugating enzyme E2 5B-like
Storvum023419t1	-0.60243	-0.0298887	-0.177688	-0.72528	-0.53601	2.0389	-0.260606	-0.976735	1.26974	AT4G14815.1	Bifunctional inhibitor/lipid-transfer protein/seed storage 2S albumin superfamily protein	non-specific lipid-transfer protein-like protein At2g13820
Storvum023474t1	-0.951341	-0.947953	-0.294341	-0.782099	1.01119	2.07122	0.310333	-0.174567	-0.24244	AT5G09530.1	hydroxyproline-rich glycoprotein family protein	PREDICTED: extensin-2-like
Storvum023497t1	0.54094	-0.203259	-0.283129	-0.874874	1.53289	1.45421	-0.00405715	-1.17442	-0.988305	AT3G24060.1	Plant self-incompatibility protein S1 family	S-protein homolog 31-like
Storvum023650t1	-0.570814	-0.460667	-0.372012	-0.669983	0.118345	2.43756	-0.621433	-0.441937	0.580942	AT1G70880.1	Polyketide cyclase/dehydrase and lipid transport superfamily protein	kirola-like
Storvum023657t3	-0.472289	-0.387335	-0.576729	-0.430892	-0.195555	2.52168	-0.482089	-0.477696	0.500902	AT2G45180.1	Bifunctional inhibitor/lipid-transfer protein/seed storage 2S albumin superfamily protein	14 kDa proline-rich protein DC2.15-like
Storvum023684t1	-0.544437	0.276948	-0.777102	-0.0399759	-0.0731176	2.11239	-0.862583	-0.99621	0.904084	AT1G74670.1	Gibberellin-regulated family protein	protein GAST1-like
Storvum023702t2	-0.846481	-0.639902	-0.261895	-0.902069	0.832607	2.16148	-0.599456	-0.214499	0.470219	AT4G04900.1	ROP-interactive CRIB motif-containing protein 10	CRIB domain-containing protein RIC10-like
Storvum023786t1	-0.687187	0.229413	-0.307985	-0.906703	0.951603	2.03867	-0.966123	-0.67645	0.32476	AT2G05620.1	proton gradient regulation 5	protein PROTON GRADIENT REGULATION 5, chloroplastic
Storvum023804t1	-0.116628	1.10489	-0.468698	-1.44188	-0.795033	1.84108	-0.478644	-0.0992908	0.454211	AT3G16140.1	photosystem I subunit H-1	photosystem i reaction center subunit vi, chloroplastic
Storvum023902t1	-1.0426	-0.598766	-0.759291	-0.688407	0.564694	2.11665	-0.40468	0.0812312	0.731168	AT1G68760.1	nudix hydrolase 1	nudix hydrolase 1-like
Storvum024098t1	-1.20811	-0.891485	0.294731	0.0153751	0.0365843	2.20485	0.260624	-0.843167	0.130597	AT1G77765.2		uncharacterized LOC101244159
Storvum024265t1	-0.75727	-0.621965	-0.250032	-0.986768	1.76748	1.46485	-0.764953	-0.187859	0.336513	AT3G51380.1	IQ-domain 20	protein IQ-DOMAIN 1-like
Storvum024622t2	-0.94578	-0.567989	0.431752	-1.47125	0.57673	1.90522	-0.424739	-0.0400678	0.536123	AT5G16980.1	Zinc-binding dehydrogenase family protein	uncharacterized protein LOC104649334
Storvum024851t2	-0.387255	0.00594604	-0.364155	-0.472643	0.169946	2.57938	-0.373863	-0.613383	-0.543973	AT2G45180.1	Bifunctional inhibitor/lipid-transfer protein/seed storage 2S albumin superfamily protein	14 kDa proline-rich protein DC2.15-like
Storvum024909t1	-0.543981	-0.398059	-0.637422	-0.538082	0.0618007	2.45917	-0.630905	-0.319011	0.546489	AT4G23160.1	cysteine-rich RLK (RECEPTOR-like protein kinase) 8	Retrovirus-related Pol polyprotein from transposon TNT 1-94
Storvum025057t1	-0.774967	-0.00791788	0.429629	-0.970834	0.2406	2.35291	-0.12858	-0.496566	-0.644273	AT4G30460.1	glycine-rich protein	---NA---
Storvum025573t1	-1.20879	-0.33895	0.238187	-0.623233	-0.255466	2.38039	-0.455591	0.0817323	0.181719	AT1G12050.1	fumarylacetoacetase, putative	Fumarylacetoacetase
Storvum025583t1	-1.3058	-1.13743	-0.971105	1.10995	0.129441	1.41296	-0.219541	0.866924	0.114603	AT5G50915.2	basic helix-loop-helix (bHLH) DNA-binding superfamily protein	PREDICTED: uncharacterized protein LOC102601442
Storvum025787t1	-0.574105	-0.451431	-0.678603	-1.00932	1.29226	1.66501	-0.916861	-0.152383	0.825435	AT2G10940.2	Bifunctional inhibitor/lipid-transfer protein/seed storage 2S albumin superfamily protein	36.4 kDa proline-rich protein-like
Storvum025804t1	-0.741484	0.140449	-0.238918	-1.03949	0.724566	1.99941	-0.603748	-0.950065	0.709287	AT3G18280.1	Bifunctional inhibitor/lipid-transfer protein/seed storage 2S albumin superfamily protein	Non-specific lipid-transfer protein 2
Storvum026156t1	-1.10327	-0.443734	-0.963989	-0.67642	0.454207	2.04942	-0.397432	0.382189	0.699033	AT3G18280.1	Bifunctional inhibitor/lipid-transfer protein/seed storage 2S albumin superfamily protein	non-specific lipid-transfer protein 2-like
Storvum026166t1	-0.709142	-0.273764	-0.257108	-0.529242	1.09563	2.01903	-0.820116	-0.965688	0.440409	AT1G57765.2		---NA---
Storvum026335t1	0.0795021	-0.924449	0.909695	-1.19219	-0.523785	1.14414	0.501516	-1.23319	1.23876	AT4G35940.1		PREDICTED: uncharacterized protein LOC107061778
Storvum026405t1	-0.0630047	0.817209	-0.024895	-1.18974	-0.353007	2.13738	-0.669165	-0.855092	0.200316	NA	NA	---NA---
Storvum027056t1	-0.591458	-0.410414	-0.499523	-0.568423	-0.0782781	2.4798	-0.499874	-0.410669	0.57884	AT2G29620.1		organ-specific protein S2-like
Storvum027285t1	-0.787471	-0.418167	-0.35687	-0.532908	0.750841	2.40735	-0.427256	-0.476018	-0.159501	AT3G11750.1	Dihydroneopterin aldolase	dihydroneopterin aldolase 1-like isoform X2
Storvum027340t1	-0.78216	-0.198506	0.591361	-0.261528	0.279034	2.34219	-0.678492	-0.456031	-0.83587	NA	NA	---NA---
Storvum027567t1	-0.561446	-0.148935	-0.21531	-0.493207	1.50016	1.9316	-0.83596	-0.593279	-0.583623	AT1G22690.3	Gibberellin-regulated family protein	gibberellin-regulated protein 9-like
Storvum027791t1	-0.645021	-0.318264	-0.602046	-0.512908	-0.0984178	2.41337	-0.23456	-0.696794	0.694638	AT3G08770.1	lipid transfer protein 6	non-specific lipid-transfer protein 1-like
Storvum027810t1	-0.980532	0.193058	-0.417597	-0.317975	0.503249	1.88693	0.990455	-1.24949	-0.608104	AT3G51380.1	IQ-domain 20	protein IQ-DOMAIN 1-like
Storvum028517t2	-1.03094	-0.0044235	0.552694	-0.853073	-0.0800925	2.13399	-0.972128	-0.300973	0.554946	AT5G05960.1	Bifunctional inhibitor/lipid-transfer protein/seed storage 2S albumin superfamily protein	xylem sap protein 10 kDa precursor
Storvum028776t1	-0.814028	-0.6906	-0.275429	-0.709333	1.16357	2.08116	0.261612	-0.435254	-0.581706	AT5G09400.1	K+ uptake permease 7	adhesive plaque matrix protein-like
Storvum028955t1	-0.836046	-0.256288	-0.42633	-0.815837	0.8575	2.2812	-0.408922	-0.516608	0.121331	AT3G29780.1	ralf-like 27	Protein RALF-like 27
Storvum029397t1	-0.839678	-0.424896	-0.54251	-0.671799	0.954288	2.26429	-0.00126586	-0.540182	-0.198248	AT4G10440.1	S-adenosyl-L-methionine-dependent methyltransferases superfamily protein	---NA---
Storvum029691t1	-1.01409	-0.631793	-0.268878	-0.885639	0.725838	2.26717	0.0455703	-0.0229787	-0.215202	NA	NA	---NA---
Storvum029910t1	-0.541846	-0.19063	-0.526767	-0.478735	1.63975	1.80957	-0.956731	-0.378621	-0.375993	AT3G22540.1	Protein of unknown function (DUF1677)	Taste receptor type 1 member 2 like
Storvum030237t1	-0.997369	-0.52394	-0.909287	-0.607055	1.474	1.60987	0.457087	-0.718271	0.21496	AT1G01040.1	dicer-like 1	---NA---
Storvum030252t2	-0.757002	-1.01327	0.310328	-0.869939	1.18892	1.78094	-0.0362146	0.321936	-0.925699	AT1G72060.1	serine-type endopeptidase inhibitors	proteinase inhibitor PSI-1.2-like
Storvum031000t1	-0.537193	-0.618583	0.0249116	-0.725439	0.156715	2.29235	0.768745	-0.632433	-0.72907	AT1G68940.3	Armadillo/beta-catenin-like repeat family protein	probable serine/threonine-protein kinase kinX
Storvum031549t1	-0.499761	-0.0629294	-0.735672	-0.467956	-0.807299	2.26138	-0.526462	-0.124545	0.963243	AT3G57450.1		hypothetical protein BC332_13138
Storvum031987t1	-1.46468	-0.545596	0.799233	0.940202	-0.405973	1.49805	-0.621842	-0.880325	0.680928	AT3G11230.1	Yippee family putative zinc-binding protein	Protein yippee-like
Storvum032306t1	-0.651765	0.336033	0.780938	-0.56423	0.291022	2.1443	-0.633113	-0.844273	-0.858911	AT5G39950.1	thioredoxin 2	thioredoxin H2-like
Storvum032758t1	-0.479045	-0.211088	-1.61339	0.0570634	0.750144	1.75898	0.43193	-1.06672	0.372127	AT4G17100.2		poly(U)-specific endoribonuclease-B isoform X2
Storvum033347t1	-1.71929	0.523779	0.457589	-0.472124	0.391968	1.54334	-1.14997	0.653508	-0.228798	AT1G67890.1	PAS domain-containing protein tyrosine kinase family protein	serine/threonine-protein kinase EDR1-like isoform X3
Storvum033861t2	-1.08831	-0.288601	-0.549332	-0.642607	0.544948	2.20887	-0.74638	0.0288972	0.532521	AT5G06060.1	NAD(P)-binding Rossmann-fold superfamily protein	tropinone reductase 2
Storvum034335t1	-1.16498	0.0352009	-0.409738	-1.02008	0.495583	2.16181	-0.61591	0.242601	0.275512	AT3G06330.2	RING/U-box superfamily protein	PREDICTED: uncharacterized protein LOC107828656 isoform X3
Storvum034784t1	-0.578229	-0.301518	-0.144565	-1.30035	-0.244969	2.165	0.534347	0.576139	-0.705861	AT5G05365.1	Heavy metal transport/detoxification superfamily protein	copper transport protein CCH
Storvum034874t1	-1.06694	0.357479	-0.529528	-0.696739	1.45052	1.62975	-1.09718	0.0148119	-0.0621682	AT5G40960.1	Protein of unknown function (DUF 3339)	PREDICTED: uncharacterized protein LOC102579145
Storvum035483t2	-0.61988	-0.204423	-0.450293	-0.614823	-0.00959704	2.41338	-0.795284	-0.357908	0.638823	AT5G48485.1	Bifunctional inhibitor/lipid-transfer protein/seed storage 2S albumin superfamily protein	putative lipid-transfer protein DIR1
Storvum035719t3	-0.81053	-0.69713	-0.450745	-0.757481	0.920241	2.21005	-0.443509	-0.260956	0.290059	AT5G47400.1		WAT1-related protein At2g37460-like
Storvum035949t1	-0.653483	-0.217441	0.10762	-0.017366	-0.396443	2.54026	-0.168356	-0.881633	-0.313162	AT4G13310.2	cytochrome P450, family 71, subfamily A, polypeptide 20	premnaspirodiene oxygenase-like
Storvum036845t1	-0.0588364	-1.25939	0.306701	1.32757	-0.142494	1.54868	-1.30386	-0.626128	0.207762	AT4G30830.1	Protein of unknown function, DUF593	---NA---
Storvum036988t1	-0.21829	-0.247275	0.440602	0.0554318	1.27497	1.62572	-0.470652	-1.52767	-0.932839	AT2G35330.1	RING/U-box superfamily protein	---NA---
Storvum037377t1	-0.813602	-0.880808	-0.694394	-0.606799	1.33992	1.64114	-0.834699	0.136715	0.712521	NA	NA	---NA---
Storvum037471t1	-1.47392	-0.389432	-0.817102	-0.615975	0.681789	2.00031	0.058482	0.327018	0.228828	AT1G73380.1		UPF0415 protein C7orf25 homolog
Storvum038423t1	-0.975428	-0.528073	-0.878363	-0.499425	0.0119897	2.19296	-0.491056	0.491616	0.675775	AT3G51680.1	NAD(P)-binding Rossmann-fold superfamily protein	secoisolariciresinol dehydrogenase-like
Storvum038483t2	-0.719528	-0.710531	0.0160061	-0.43061	-0.0586025	2.49395	-0.705939	-0.120607	0.235863	AT1G62630.1	Disease resistance protein (CC-NBS-LRR class) family	Putative polyprotein, identical
Storvum038867t1	-0.769559	-1.14622	-1.16477	0.181873	-0.118392	1.93034	0.635218	-0.253064	0.704579	AT4G21820.1	binding;calmodulin binding	---NA---
Storvum038944t1	-1.17866	0.0828509	-0.175494	1.62399	-0.179424	1.19053	-1.38182	0.545953	-0.527921	AT2G04400.1	Aldolase-type TIM barrel family protein	---NA---
Storvum038985t1	-0.23246	-0.443973	-0.590143	-0.902737	1.03341	1.65426	-0.451091	-1.1684	1.10114	AT3G54250.1	GHMP kinase family protein	---NA---
Storvum040873t1	-0.864052	-0.222297	-0.0903334	-0.674409	1.02931	2.09312	-0.618039	-0.920374	0.267077	AT5G57850.1	D-aminoacid aminotransferase-like PLP-dependent enzymes superfamily protein	D-amino-acid transaminase, chloroplastic-like isoform X2
Storvum041748t1	-0.783357	-0.796203	-0.120168	-0.824144	2.0908	1.20939	-0.138007	-0.288101	-0.350206	NA	NA	hypothetical protein COLO4_07391
Storvum042407t1	-0.874922	-0.41853	-0.623859	-0.84804	0.811943	2.28714	-0.208092	-0.131788	0.006147	AT5G39570.1		PREDICTED: extensin-2-like
Storvum042737t1	-1.36862	-1.05009	0.933292	-0.539799	0.494442	1.79658	-0.581031	0.19152	0.123706	AT4G32785.1		---NA---
Storvum042923t1	-0.200823	-1.27827	0.565684	0.0587937	1.3343	1.19533	0.553048	-1.06353	-1.16453	NA	NA	---NA---
Storvum043017t1	-0.656818	0.518873	0.296693	-0.551278	0.780337	1.95737	-0.213412	-0.792511	-1.33925	AT3G27870.1	ATPase E1-E2 type family protein / haloacid dehalogenase-like hydrolase family protein	---NA---
Storvum043330t1	-0.165686	-0.622723	-0.69887	-0.563983	0.985908	2.16469	-0.490667	-0.893561	0.28489	AT3G57450.1		hypothetical protein BC332_13138
Storvum043940t1	0.189545	-0.533974	-0.405559	-0.890449	0.196544	2.23456	-0.661152	-0.853481	0.723965	AT2G39570.1	ACT domain-containing protein	ACT domain-containing protein ACR9
Storvum044839t1	-0.036223	-0.163656	0.630592	-0.546348	-0.640972	2.36231	-0.167344	-0.386029	-1.05233	AT2G43670.1	Carbohydrate-binding X8 domain superfamily protein	---NA---
Storvum044861t2	-0.765661	-1.27424	-0.435062	0.367361	0.391904	0.436383	2.17134	-0.377931	-0.514093	AT5G61250.1	glucuronidase 1	---NA---
Storvum045532t1	-0.56125	0.495516	0.181138	-1.34975	1.35496	1.63941	-0.451458	-0.629139	-0.679422	AT2G25590.1	Plant Tudor-like protein	---NA---
Storvum045835t1	0.610075	-0.848233	-1.01846	0.317429	0.482603	1.98799	-1.01087	-0.722842	0.202315	AT4G14180.1	putative recombination initiation defect 1	---NA---
Storvum046737t1	-1.90662	-0.297848	0.233502	0.00462082	1.11934	1.36532	0.211075	0.265372	-0.994758	AT1G73875.1	DNAse I-like superfamily protein	carbon catabolite repressor protein 4 homolog 5 isoform X1
Storvum046857t1	0.81025	-1.40851	-0.926745	-0.0129473	1.00111	1.51517	-0.841286	0.424143	-0.561183	AT1G52310.1	protein kinase family protein / C-type lectin domain-containing protein	---NA---
Storvum047359t1	-1.00883	-0.334083	-0.0898088	-1.57729	0.462009	1.89965	0.404753	-0.301937	0.545536	AT2G47000.1	ATP binding cassette subfamily B4	ABC transporter B family member 21-like isoform X2
Storvum047499t1	-0.97001	-0.728987	0.0980687	-1.0784	1.31706	1.80052	0.310658	-0.403239	-0.345668	AT5G09530.1	hydroxyproline-rich glycoprotein family protein	hypothetical protein BC332_16901
Storvum047501t1	-1.06406	0.254755	0.195804	-0.228021	-0.00186595	2.07064	-1.54041	0.195896	0.117258	AT5G19610.1	GNOM-like 2	FRIGIDA-like protein 5
Storvum047600t1	-1.0673	-1.19294	1.92496	-0.64189	-0.614612	0.676682	0.540826	0.43422	-0.0599489	AT5G63220.1		Golgi to ER traffic protein 4 homolog
Storvum047675t1	-0.959607	-0.49238	-0.435646	-0.0868149	-0.368678	2.27949	-0.349415	-0.535091	0.948139	AT3G11340.1	UDP-Glycosyltransferase superfamily protein	UDP-glucose iridoid glucosyltransferase-like
Storvum048268t1	0.198923	-1.10291	-0.674153	-0.379884	1.50328	0.946642	0.19279	-1.50803	0.823347	AT5G56810.1	F-box/RNI-like/FBD-like domains-containing protein	---NA---
Storvum048663t1	-0.609805	-0.633081	0.916128	-1.29085	-0.59055	1.78295	0.479124	-0.720888	0.666981	AT1G60220.1	UB-like protease 1D	ubiquitin-like-specific protease 1D isoform X2
Storvum048948t1	-0.349591	-0.346794	-0.290642	-0.616653	1.78143	1.49648	-0.0681126	-0.262051	-1.34407	AT3G42850.1	Mevalonate/galactokinase family protein	---NA---
Storvum050065t1	-1.07929	0.619274	-0.384888	-1.33081	1.18858	1.66971	-0.487871	0.0960724	-0.290777	AT5G54780.1	Ypt/Rab-GAP domain of gyp1p superfamily protein	TBC1 domain family member 15-like
Storvum050406t1	-0.41577	0.300094	0.349144	-1.20887	0.479138	1.33145	-0.585441	-1.4992	1.24945	AT5G20120.1		---NA---
Storvum050574t1	-0.83587	0.2449	-0.26625	-0.991666	1.97058	1.16676	-0.177781	-0.171811	-0.938853	AT4G35670.1	Pectin lyase-like superfamily protein	---NA---
Storvum051220t1	-0.803597	-0.761473	-0.198635	-0.364023	-0.3691	2.35471	-0.273456	-0.408824	0.824401	AT1G12160.1	Flavin-binding monooxygenase family protein	---NA---
Storvum051245t1	0.174926	0.161536	-0.90308	-1.51373	1.52857	1.2892	-0.274179	0.340824	-0.804058	AT1G66680.1	S-adenosyl-L-methionine-dependent methyltransferases superfamily protein	---NA---
Storvum051324t1	-1.15292	-0.079406	-0.409513	-0.923675	0.58738	2.27222	-0.248926	0.16795	-0.213112	NA	NA	---NA---
Storvum051369t1	-1.06221	-0.400652	-0.822127	-0.307692	0.727717	2.23322	-0.0763178	-0.579181	0.287237	AT3G13330.1	proteasome activating protein 200	---NA---
[truncated: 38 more rows]

## Sheet: Cluster 5
	Scaled expression									Arabidopsis (TAIR10) BLASTX hit		NCBI non-redundant database BLASTX hit
[truncated: 522 more rows]

## Sheet: Cluster 6
	Scaled expression									Arabidopsis (TAIR10) BLASTX hit		NCBI non-redundant database BLASTX hit
[truncated: 334 more rows]

[truncated: 3 more sheets: Cluster 7, Cluster 8, Cluster 9]
